# Supplementary material for: A big-data approach to understanding metabolic rate and response to obesity in laboratory mice
Source: eLife. 2020 May 1;9:e53560. doi: 10.7554/eLife.53560 (PMC7274785; doi:10.7554/eLife.53560)
Supplement: Figure 3—source data 1. [file elife-53560-fig3-data1.xlsx]

## Sheet: Figure 3
panel	contrast	estimate	SE	df	t.ratio	p.value
3B	male - female	-0.0112191	0.0026737	9354	-4.1961	2.74057e-05
3D	California, USA - Cambridgeshire, UK	0.0107599	0.00369291	6449	2.91365	0.101892
3D	California, USA - Canada	-0.0108627	0.00625881	6449	-1.73559	0.775142
3D	California, USA - China	-0.010705	0.00595468	6449	-1.79774	0.736899
3D	California, USA - France	-0.0260265	0.00511647	6449	-5.0868	1.65343e-05
3D	California, USA - Germany	-0.0172296	0.00387465	6449	-4.44676	0.000377234
3D	California, USA - Japan	-0.00732072	0.00768845	6449	-0.952171	0.994657
3D	California, USA - Korea	0.015441	0.00636102	6449	2.42744	0.309411
3D	California, USA - Oxfordshire, UK	-0.0196069	0.00440737	6449	-4.44867	0.000373978
3D	California, USA - Texas, USA	-0.0226411	0.00709529	6449	-3.19101	0.0461846
3D	Cambridgeshire, UK - Canada	-0.0216226	0.0058833	6449	-3.67525	0.00905685
3D	Cambridgeshire, UK - China	-0.0214648	0.00555866	6449	-3.86151	0.00447688
3D	Cambridgeshire, UK - France	-0.0367863	0.0046496	6449	-7.91172	0
3D	Cambridgeshire, UK - Germany	-0.0279895	0.00323317	6449	-8.65698	0
3D	Cambridgeshire, UK - Japan	-0.0180806	0.00738599	6449	-2.44796	0.297476
3D	Cambridgeshire, UK - Korea	0.00468112	0.00599192	6449	0.781239	0.998839
3D	Cambridgeshire, UK - Oxfordshire, UK	-0.0303668	0.00385557	6449	-7.87608	0
3D	Cambridgeshire, UK - Texas, USA	-0.033401	0.00676637	6449	-4.93633	3.58288e-05
3D	Canada - China	0.000157775	0.00751225	6449	0.0210024	1
3D	Canada - France	-0.0151637	0.00686687	6449	-2.20825	0.451042
3D	Canada - Germany	-0.0063669	0.00599905	6449	-1.06132	0.988209
3D	Canada - Japan	0.00354202	0.00894919	6449	0.395792	0.999996
3D	Canada - Korea	0.0263037	0.00783826	6449	3.35581	0.0274479
3D	Canada - Oxfordshire, UK	-0.0087442	0.00635615	6449	-1.37571	0.934755
3D	Canada - Texas, USA	-0.0117784	0.00844505	6449	-1.39471	0.929195
3D	China - France	-0.0153215	0.00659085	6449	-2.32466	0.372897
3D	China - Germany	-0.00652467	0.00568102	6449	-1.1485	0.979554
3D	China - Japan	0.00338424	0.00873918	6449	0.387249	0.999997
3D	China - Korea	0.026146	0.00759761	6449	3.44134	0.0206587
3D	China - Oxfordshire, UK	-0.00890198	0.0060569	6449	-1.46973	0.904145
3D	China - Texas, USA	-0.0119362	0.00822218	6449	-1.4517	0.910622
3D	France - Germany	0.00879684	0.00479521	6449	1.8345	0.713154
3D	France - Japan	0.0187058	0.00819106	6449	2.28368	0.399757
3D	France - Korea	0.0414675	0.00696016	6449	5.95783	1.20661e-07
3D	France - Oxfordshire, UK	0.00641953	0.00523508	6449	1.22625	0.968315
3D	France - Texas, USA	0.00338534	0.00763704	6449	0.443279	0.99999
3D	Germany - Japan	0.00990891	0.00747851	6449	1.32499	0.948103
3D	Germany - Korea	0.0326706	0.0061056	6449	5.35092	4.02632e-06
3D	Germany - Oxfordshire, UK	-0.00237731	0.00402998	6449	-0.589905	0.999884
3D	Germany - Texas, USA	-0.0054115	0.00686724	6449	-0.788017	0.998757
3D	Japan - Korea	0.0227617	0.00902096	6449	2.5232	0.256019
3D	Japan - Oxfordshire, UK	-0.0122862	0.00776789	6449	-1.58167	0.857309
3D	Japan - Texas, USA	-0.0153204	0.00955292	6449	-1.60374	0.846743
3D	Korea - Oxfordshire, UK	-0.0350479	0.00645682	6449	-5.42805	2.63061e-06
3D	Korea - Texas, USA	-0.0380821	0.00852107	6449	-4.46917	0.000340575
3D	Oxfordshire, UK - Texas, USA	-0.0030342	0.0071813	6449	-0.422514	0.999993

## Sheet: Figure 4
panel	contrast	estimate	SE	df	t.ratio	p.value
4C	18-22 - 22-26	0.0065562	0.00216066	3143	3.03435	0.00686369
4C	18-22 - 26-29	0.00859168	0.00271477	3143	3.1648	0.00446615
4C	22-26 - 26-29	0.00203548	0.00277722	3143	0.732919	0.743939
