# Supplementary material for: A big-data approach to understanding metabolic rate and response to obesity in laboratory mice
Source: eLife. 2020 May 1;9:e53560. doi: 10.7554/eLife.53560 (PMC7274785; doi:10.7554/eLife.53560)
Supplement: Figure 6—source data 1. [file elife-53560-fig6-data1.xlsx]

## Sheet: males
institution	strain	zygosity	sex	room_temp	duration	diet_kcal	total_mass_1	total_mass_2	lean_mass	fat_mass	mass_change	ee	vo2	vco2	amb_act	loc_act	food_intake	water_intake	energy_intake	rer	age_in_weeks	resid	sd
ICS	Ppp6c	heterozygote	male	21	20.4286	3.145	24.7429	25.3571	15.9485	2.17285	0.614286	2.73592	135.249	109.299	712.604	1155.42	0.258571	0.148254	3.40246	0.80687	11	0.777708	5.74368
UC Davis	Foxn1	homozygote	male	24.15	25.5	3.1	23.11	23.21	18.8602	3.25025	0.1	2.62881	126.52	117.256	NaN	NaN	NaN	NaN	NaN	0.926775	11	0.908489	4.85332
BCM	Usf3	homozygote	male	22.75	21	3.1	21.5	22.5	15.7185	2.52941	1	2.56328	122.59	117.098	NaN	NaN	NaN	NaN	NaN	0.9552	11	0.77476	4.13892
MARC	Usp16	heterozygote	male	24	47.8155	NaN	26.6571	27.2571	19.7311	6.04665	0.6	2.59275	124.272	117.474	NaN	NaN	NaN	NaN	NaN	0.945258	10	0.744476	3.97714
MARC	Psmd14	heterozygote	male	24	21.375	NaN	25.5	25.7	21.0285	4.02324	0.2	2.53861	120.989	117.473	NaN	NaN	NaN	NaN	NaN	0.967287	10	0.727867	3.88841
BCM	Nos1ap	heterozygote	male	22.75	21.3333	3.1	27.6833	26.8667	NaN	NaN	-0.816667	2.66781	127.65	121.657	NaN	NaN	NaN	NaN	NaN	0.952291	10.6667	0.678739	3.62596
BCM	Nos1ap	homozygote	male	22.75	21.3	3.1	27.7	27.8	19.8414	3.74147	0.1	2.66812	127.182	123.391	NaN	NaN	NaN	NaN	NaN	0.970665	10.3	0.678504	3.6247
WTSI	Acer1	homozygote	male	21.5	21.3714	3.4	31.0714	30.3286	23.8441	6.82702	-0.742857	2.59137	125.899	111.377	1648.05	2401.19	0.186893	0.155102	2.65867	0.884794	11.7143	0.490593	3.62322
BCM	Fmc1	heterozygote	male	22.75	21.2857	3.1	27.6143	27.8857	NaN	NaN	0.271429	2.66149	127.878	119.479	NaN	NaN	NaN	NaN	NaN	0.933595	10.4286	0.674658	3.60415
ICS	Gm12258	homozygote	male	21	20.5	3.145	23.5333	24.1667	16.775	1.20872	0.633333	2.42432	121.595	90.6136	857.265	1330.05	0.281111	0.150476	3.69905	0.745305	10	0.482867	3.56617
BCM	Ckap4	heterozygote	male	22.75	21	3.1	24.7	25.0333	16.3776	4.51721	0.333333	2.5568	121.404	119.925	NaN	NaN	NaN	NaN	NaN	0.992493	11	0.664494	3.54985
ICS	Cdon	heterozygote	male	21	21	3.145	26.0444	26.8556	NaN	NaN	0.811111	2.45715	116.465	115.99	643.672	1053.26	0.281323	0.144422	3.70184	0.996423	11	0.477663	3.52773
ICS	Stradb	homozygote	male	21	21	3.145	25.68	27	16.9602	3.73851	1.32	2.46115	116.973	115.045	869.245	1376.95	0.319143	0.148889	4.1995	0.983371	10.4	0.476515	3.51925
BCM	Pyroxd1	heterozygote	male	22.75	21	3.1	25.5714	25.5	18.1464	3.44105	-0.0714286	2.57271	123.346	116.443	NaN	NaN	NaN	NaN	NaN	0.943836	10.5714	0.652134	3.48382
MARC	Usp39	heterozygote	male	24	21.375	NaN	27.2429	27.8	NaN	NaN	0.557143	2.50497	118.691	118.393	NaN	NaN	NaN	NaN	NaN	0.995254	11	0.637701	3.40672
ICS	Cdc27	heterozygote	male	21	21	3.145	25.3857	26.0714	16.7999	3.27941	0.685714	2.42517	115.532	112.403	750.351	1211.52	0.292585	0.151973	3.85003	0.9724	10.2857	0.452444	3.34148
BCM	Anapc4	heterozygote	male	22.75	21.1429	3.1	28.2714	28.3143	20.2438	3.959	0.0428571	2.62903	125.412	121.254	NaN	NaN	NaN	NaN	NaN	0.967132	10.2857	0.620888	3.3169
UC Davis	Cd248	homozygote	male	24.15	25.5667	3.1	28.14	28.2	21.0132	6.22361	0.06	2.27849	109.832	101.016	207.833	554.25	0.0733333	0.174	0.951163	0.919726	10	0.444044	3.27944
BCM	Nr6a1	heterozygote	male	22.75	21	3.1	22.5	23.3	15.8612	3.26027	0.8	2.42633	115.275	113.568	NaN	NaN	NaN	NaN	NaN	0.985211	10	0.605374	3.23402
BCM	Thegl	homozygote	male	22.75	21	3.1	25.9	25.9625	18.3963	3.5721	0.0625	2.53526	121.139	116.215	NaN	NaN	NaN	NaN	NaN	0.958113	10.375	0.604025	3.22682
BCM	Usf3	heterozygote	male	22.75	21	3.1	26.7444	26.8111	18.587	4.28137	0.0666667	2.5596	122.184	117.75	NaN	NaN	NaN	NaN	NaN	0.964342	10.5556	0.600982	3.21056
ICS	Morc3	heterozygote	male	21	21	3.145	23.9875	24.85	16.128	2.624	0.8625	2.37332	112.835	110.807	933.159	1451.57	0.278988	0.148452	3.67112	0.981685	10.125	0.418525	3.09097
ICS	Mir124a-2	heterozygote	male	21	21	3.145	24.7571	25.2429	18.5718	3.63686	0.485714	2.37119	115.688	100.182	755.656	1219.86	0.260476	0.151361	3.42752	0.865998	10.2857	0.410276	3.03005
BCM	Tead1	heterozygote	male	22.75	21.1875	3.1	25.9625	25.7563	18.7426	3.41388	-0.20625	2.50039	120.076	112.466	NaN	NaN	NaN	NaN	NaN	0.936192	10.4375	0.567129	3.02971
ICS	Nlk	heterozygote	male	21	21	3.145	26.8375	26.975	15.8336	3.78921	0.1375	2.41141	115.415	109.847	1094.16	1649.86	0.229762	0.101905	3.02336	0.951644	10	0.394157	2.91101
ICS	Dcaf7	heterozygote	male	21	21	3.145	23.375	24.075	15.8411	2.49585	0.7	2.32881	111.256	106.818	849.75	1348.12	0.257738	0.159388	3.39149	0.960236	10	0.389736	2.87835
BCM	Memo1	heterozygote	male	22.75	21	3.1	24.4273	25.1364	17.6553	3.06584	0.709091	2.42084	115.898	110.165	NaN	NaN	NaN	NaN	NaN	0.947195	10	0.537374	2.87075
BCM	Dgcr2	homozygote	male	22.75	21.25	3.1	25.825	25.9	17.7908	3.81787	0.075	2.46169	117.562	113.061	NaN	NaN	NaN	NaN	NaN	0.962073	10	0.53289	2.8468
BCM	Ckap4	homozygote	male	22.75	22.3333	3.1	23.4667	23.6333	16.2798	3.68068	0.166667	2.37995	113.291	110.616	NaN	NaN	NaN	NaN	NaN	0.978878	10.3333	0.527642	2.81877
BCM	Awat1	hemizygote	male	22.75	21.2333	3.1	25.8	26.1714	18.7533	3.25507	0.371429	2.44973	117.565	110.467	NaN	NaN	NaN	NaN	NaN	0.939958	11	0.521747	2.78727
BCM	Fgfr4	heterozygote	male	22.75	21.3333	3.1	25.4667	25.2667	NaN	NaN	-0.2	2.43762	116.865	110.345	NaN	NaN	NaN	NaN	NaN	0.94791	10.6667	0.520444	2.78031
BCM	Smco2	homozygote	male	22.75	20.5	3.1	26.3375	26.0625	19.083	3.38343	-0.275	2.4632	117.881	112.253	NaN	NaN	NaN	NaN	NaN	0.94943	10.125	0.51778	2.76608
BCM	Fbxw9	heterozygote	male	22.75	20.9905	3.1	26.5857	26.4571	19.0834	3.3387	-0.128571	2.45981	117.756	111.965	NaN	NaN	NaN	NaN	NaN	0.949775	10.5714	0.506338	2.70495
KMPC	Dnase1l2	homozygote	male	22	20	NaN	23.4713	23.4387	18.3238	4.64641	-0.0325	2.42181	115.845	110.562	NaN	NaN	0.185	0.124048	NaN	0.954083	10	0.504848	2.69699
BCM	1700125H20Rik	homozygote	male	22.75	20.625	3.1	26.8	26.725	18.7021	4.00006	-0.075	2.46177	117.866	111.994	NaN	NaN	NaN	NaN	NaN	0.952541	10.5	0.501345	2.67828
BCM	Hyal4	homozygote	male	22.75	20.5714	3.1	25.6714	26.1714	18.7895	2.88742	0.5	2.41974	115.356	111.856	NaN	NaN	NaN	NaN	NaN	0.970135	10.1429	0.495922	2.64931
ICS	Gemin4	heterozygote	male	21	21	3.145	23.8833	24.65	18.5446	3.54615	0.766667	2.30095	109.394	107.432	735.015	1177.05	0.284127	0.148286	3.73874	0.981399	10.6667	0.35851	2.64773
BCM	Acat2	heterozygote	male	22.75	21	3.1	26.125	26.2625	18.1354	3.81934	0.1375	2.42738	116.176	110.586	NaN	NaN	NaN	NaN	NaN	0.952236	10.625	0.488854	2.61155
ICS	Pik3ap1	homozygote	male	21	21	3.145	25.77	26.59	19.5117	3.36255	0.82	2.3405	111.623	108.036	897.836	1401.39	0.28919	0.133214	3.80536	0.968089	10	0.353207	2.60857
BCM	Ftsj1	hemizygote	male	22.75	21.5	3.1	24.8875	25.1625	17.8055	3.4985	0.275	2.38352	113.407	110.975	NaN	NaN	NaN	NaN	NaN	0.981025	10.875	0.485126	2.59164
BCM	Tbx10	homozygote	male	22.75	21.3333	3.1	24.2	24.4333	17.436	3.53623	0.233333	2.35809	112.339	109.285	NaN	NaN	NaN	NaN	NaN	0.970532	10.3333	0.481994	2.5749
BCM	Wdr1	heterozygote	male	22.75	21.2333	3.1	27.4286	27.0143	19.7178	3.45462	-0.414286	2.46277	119.211	107.419	NaN	NaN	NaN	NaN	NaN	0.901532	10.7143	0.481963	2.57474
ICS	Bscl2	homozygote	male	21	21	3.145	22.6571	22.8714	NaN	NaN	0.214286	2.26409	109.539	98.9481	701.558	1139.25	0.320884	0.676286	4.22241	0.903051	10.8571	0.346725	2.5607
ICS	Dync1h1	heterozygote	male	21	21	3.145	24.1	24.4875	16.2409	2.6255	0.3875	2.31465	110.239	107.381	1144.5	1745.57	0.24875	0.150655	3.27322	0.974451	11	0.346614	2.55988
ICS	Tubg1	heterozygote	male	21	21	3.145	25.36	26.44	19.6061	3.65458	1.08	2.32001	110.5	107.609	790.436	1247.95	0.311238	0.161429	4.09548	0.97395	10.4	0.346405	2.55834
ICS	Nrp1	heterozygote	male	21	21.2222	3.145	24.6667	24.8778	17.0012	2.84579	0.211111	2.30225	110.049	105.378	722.636	1156.89	0.247672	0.118503	3.25904	0.957901	10	0.345453	2.55131
BCM	2210010C04Rik	homozygote	male	22.75	21.875	3.1	25.6375	26.1	17.3731	4.33924	0.4625	2.39825	114.382	110.685	NaN	NaN	NaN	NaN	NaN	0.96859	10.25	0.475536	2.54041
BCM	Ap4e1	homozygote	male	22.75	20.6593	3.1	26.3333	26.5333	19.1678	3.17107	0.2	2.4191	116.212	108.67	NaN	NaN	NaN	NaN	NaN	0.938381	10.5556	0.473817	2.53122
BCM	Clic5	homozygote	male	22.75	21.2333	3.1	23.725	23.875	16.8837	3.41264	0.15	2.32078	112.116	102.015	NaN	NaN	NaN	NaN	NaN	0.910252	10.5	0.460092	2.4579
BCM	Car13	homozygote	male	22.75	21.2333	3.1	23.8286	24.3857	16.996	3.21889	0.557143	2.31836	111.942	102.115	NaN	NaN	NaN	NaN	NaN	0.913505	10.5714	0.454315	2.42704
BCM	Pde12	heterozygote	male	22.75	21.7143	3.1	28.0714	27.6	20.1034	4.00437	-0.471429	2.44977	117.394	111.085	NaN	NaN	NaN	NaN	NaN	0.945853	10.7143	0.448106	2.39387
ICS	Enpp4	homozygote	male	21	21	3.145	25.3375	26.6125	19.8844	3.46577	1.275	2.29587	108.126	110.853	768.489	1241.84	0.293095	0.168155	3.85675	1.02566	10.5	0.322932	2.38498
ICS	Fam3b	homozygote	male	21	21	3.145	23.9714	24.1	18.6065	3.0599	0.128571	2.27292	111.5	93.8701	852.747	1333.38	0.238435	0.145646	3.13749	0.84097	10	0.322894	2.3847
ICS	Rcan1	homozygote	male	21	20.4286	3.145	26	26.7143	19.8995	3.42088	0.714286	2.30784	110.789	103.947	793.354	1252.34	0.269365	0.160476	3.54449	0.936854	11	0.321714	2.37599
BCM	Mapkap1	heterozygote	male	22.75	20.8667	3.1	27.1667	26.8533	19.3612	3.96455	-0.313333	2.41586	116.457	107.096	NaN	NaN	NaN	NaN	NaN	0.912614	10.6667	0.443547	2.36951
ICS	Rnf10	homozygote	male	21	21	3.145	20	20.6	13.3165	2.16238	0.6	2.24013	109.886	92.5341	1852.44	2600.84	0.231905	0.167024	3.05156	0.841869	10.75	0.31901	2.35602
ICS	Cd19	homozygote	male	21	20.7143	3.145	25.9714	26.8286	21.3956	3.59539	0.857143	2.30169	109.3	107.926	706.916	1186.4	0.269864	0.182109	3.55105	0.987789	11	0.318607	2.35304
ICS	1500015O10Rik	homozygote	male	21	21	3.145	26.1125	27.275	16.925	4.45189	1.1625	2.30032	108.682	109.83	721.937	1162.09	0.295833	0.139932	3.89278	1.01051	8	0.315425	2.32954
BCM	Asb8	homozygote	male	22.75	21.2333	3.1	26.8143	26.8571	19.646	3.26891	0.0428571	2.39644	115.779	105.315	NaN	NaN	NaN	NaN	NaN	0.910038	10	0.435558	2.32683
ICS	Ttc39a	homozygote	male	21	21	3.145	25.175	25.8625	19.7509	3.30307	0.6875	2.2869	108.511	107.54	819.045	1298.03	0.271786	0.138452	3.57634	0.991106	11	0.314977	2.32623
BCM	Zfp609	homozygote	male	22.75	21.2333	3.1	24.2	25.7	17.7402	2.98884	1.5	2.31066	109.016	110.875	NaN	NaN	NaN	NaN	NaN	1.01705	11	0.434563	2.32152
ICS	Hmgn1	homozygote	male	21	21	3.145	24.475	25.575	13.683	5.67902	1.1	2.26858	107.215	108.199	835.381	1329.81	0.276667	0.134405	3.64057	1.00911	10	0.308969	2.28186
BCM	Fgfr4	homozygote	male	22.75	20.75	3.1	24.1375	24.225	16.9499	3.57826	0.0875	2.28758	110.008	102.353	NaN	NaN	NaN	NaN	NaN	0.933619	10.625	0.413516	2.20908
BCM	Adsl	heterozygote	male	22.75	20.7143	3.1	24.9143	24.1857	17.891	3.2826	-0.728571	2.31109	111.053	103.711	NaN	NaN	NaN	NaN	NaN	0.928583	10.7143	0.411828	2.20007
ICS	Gatad2b	heterozygote	male	21	21	3.145	25.6333	26.7667	20.2181	3.20556	1.13333	2.27674	108.227	106.356	795.72	1257.64	0.291587	0.130556	3.8369	0.983846	10	0.297493	2.1971
BCM	Ginm1	homozygote	male	22.75	21.2333	3.1	24.025	24.2	17.6159	2.68588	0.175	2.28127	110.14	100.52	NaN	NaN	NaN	NaN	NaN	0.912282	11	0.410854	2.19486
ICS	Tti2	heterozygote	male	21	20.6	3.145	25.58	25.76	19.5947	3.08928	0.18	2.27182	108.83	103.146	737.064	1183.05	0.26381	0.140635	3.47139	0.947856	10.7	0.29641	2.1891
BCM	Tfeb	heterozygote	male	22.75	21	3.1	23.7824	24.1294	16.3719	4.38061	0.347059	2.27139	108.961	102.584	NaN	NaN	NaN	NaN	NaN	0.941011	10.3529	0.408839	2.1841
BCM	Smdt1	heterozygote	male	22.75	21	3.1	26.2286	25.5286	19.0617	3.56963	-0.7	2.34966	113.197	104.407	NaN	NaN	NaN	NaN	NaN	0.917616	10	0.407773	2.1784
BCM	Ccdc114	heterozygote	male	22.75	21.1095	3.1	26.6429	26.6286	19.0105	3.68308	-0.0142857	2.36059	113.423	105.961	NaN	NaN	NaN	NaN	NaN	0.934512	11	0.405264	2.165
TCP	Ggnbp2	homozygote	male	26.65	21.2667	3.1	24.79	25.55	19.7601	4.36843	0.76	2.03022	96.9496	93.2684	1330.45	3199.49	0.13619	NaN	1.76644	0.958674	11	0.293095	2.16463
BCM	Snrnp27	heterozygote	male	22.75	21	3.1	26.525	26.0375	18.996	3.29492	-0.4875	2.35613	112.822	107.139	NaN	NaN	NaN	NaN	NaN	0.948388	10.25	0.404631	2.16162
MRC Harwell	Alpk3	homozygote	male	20.1	22	NaN	25.7	NaN	20.4543	4.36181	NaN	2.38496	115.552	103.642	2017.07	3045.27	NaN	NaN	NaN	0.896926	11	0.289495	2.13804
ICS	Fam207a	homozygote	male	21	21	3.145	25.1857	25.6571	NaN	NaN	0.471429	2.26007	109.149	99.4675	861.87	1352.38	0.276122	0.138952	3.63341	0.912335	10	0.28589	2.11141
ICS	Klf12	heterozygote	male	21	21	3.145	25.5625	26.2	20.6804	3.50263	0.6375	2.26186	108.71	101.42	772.142	1207.88	0.244107	0.16381	3.21213	0.932344	11	0.285857	2.11116
BCM	G3bp1	homozygote	male	22.75	21.2333	3.1	25.8	25.2	18.4031	2.91069	-0.6	2.32004	111	105.835	NaN	NaN	NaN	NaN	NaN	0.953822	11	0.392051	2.09441
ICS	Lrrc3	homozygote	male	21	21	3.145	24.6625	25.9125	19.2306	3.1201	1.25	2.25101	106.949	105.352	924.068	1450.43	0.29619	0.15127	3.89748	0.984993	11	0.283241	2.09185
BCM	Trim59	homozygote	male	22.75	21.2333	3.1	25.95	26.2	NaN	NaN	0.25	2.32378	111.904	103.422	NaN	NaN	NaN	NaN	NaN	0.924068	10.25	0.390929	2.08842
ICS	Dyrk2	heterozygote	male	21	21	3.145	25.2333	25.9333	18.9842	4.10306	0.7	2.2795	109.161	103.624	1278.07	1935.1	0.251958	0.148231	3.31543	0.950331	10.6667	0.282462	2.08609
ICS	Exd1	homozygote	male	21	21	3.145	23.975	24.7	19.3842	2.58074	0.725	2.23369	106.324	103.835	910.443	1414.17	0.262857	0.128155	3.45885	0.97692	11	0.280546	2.07194
RBRC	Izumo1r	homozygote	male	23	19.8333	3.339	25.9857	26.6286	18.9511	4.11328	0.642857	2.12502	102.873	92.6498	322.122	323.898	0.160952	0.169683	2.24857	0.899922	11	0.27996	2.06762
BCM	Ccdc180	homozygote	male	22.75	21.2333	3.1	27.25	27.5875	19.7617	3.65333	0.3375	2.3507	112.47	107.22	NaN	NaN	NaN	NaN	NaN	0.954204	10.75	0.375677	2.00694
ICS	Sun1	homozygote	male	21	21	3.145	23.4778	23.9889	18.7724	2.53994	0.511111	2.20457	105.283	101.253	717.47	1179.43	0.256349	0.117381	3.37322	0.960669	10	0.269862	1.99303
BCM	Yju2	heterozygote	male	22.75	22	3.1	26.4286	26.0857	18.9614	3.4713	-0.342857	2.31395	110.235	107.243	NaN	NaN	NaN	NaN	NaN	0.973735	10	0.365571	1.95295
ICS	Tm7sf2	homozygote	male	21	21	3.145	23.625	24.125	18.7011	3.008	0.5	2.21268	104.945	104.209	951.983	1468.28	0.260476	0.142721	3.42752	0.99246	9.625	0.264254	1.95162
ICS	Taf2	heterozygote	male	21	21	3.145	26.0286	26.9714	20.9194	3.04523	0.942857	2.25727	107.87	103.422	959.383	1485.95	0.271293	0.146939	3.56985	0.958534	10.7143	0.261804	1.93352
BCM	Arhgap33	heterozygote	male	22.75	20.8571	3.1	27.5143	27.0429	18.4887	5.0235	-0.471429	2.345	112.137	107.175	NaN	NaN	NaN	NaN	NaN	0.955127	11	0.361413	1.93074
BCM	Sbk1	heterozygote	male	22.75	21.2333	3.1	25.3714	25.7	18.5386	3.0082	0.328571	2.27423	108.514	104.792	NaN	NaN	NaN	NaN	NaN	0.965563	10.2857	0.360142	1.92395
ICS	Ptchd1	hemizygote	male	21	21	3.145	27.45	27.7	20.0905	2.09454	0.25	2.35588	112.875	106.898	2470.82	3431.01	0.289881	0.190714	3.81445	0.947916	12	0.259748	1.91834
BCM	Kyat1	homozygote	male	22.75	21.2333	3.1	26.1	24.5	19.71	2.88	-1.6	2.29523	110.34	102.824	NaN	NaN	NaN	NaN	NaN	0.931876	10	0.357517	1.90992
BCM	Nr1d1	heterozygote	male	22.75	21	3.1	26.3333	26.1667	18.626	4.25949	-0.166667	2.29882	110.003	104.801	NaN	NaN	NaN	NaN	NaN	0.953576	10	0.353535	1.88865
BCM	Mrpl33	heterozygote	male	22.75	21.2333	3.1	24.9429	25.6571	17.5168	4.19179	0.714286	2.25336	108.42	100.616	NaN	NaN	NaN	NaN	NaN	0.928845	10.1429	0.353169	1.8867
BCM	Gm17359	homozygote	male	22.75	21.2333	3.1	27	26.75	NaN	NaN	-0.25	2.31977	111.388	104.392	NaN	NaN	NaN	NaN	NaN	0.937405	11	0.352857	1.88503
ICS	Padi3	homozygote	male	21	21	3.145	25.4	26.175	13.8442	6.30734	0.775	2.22287	105.443	104.636	712.273	1140.13	0.265774	0.120952	3.49723	0.992421	11	0.252554	1.86521
BCM	Ptgr1	homozygote	male	22.75	21.375	3.1	26.25	26.25	17.746	4.79427	-4.44089e-16	2.29167	110.238	102.418	NaN	NaN	NaN	NaN	NaN	0.928164	10.5	0.349085	1.86488
BCM	Defb47	homozygote	male	22.75	21.2333	3.1	25.66	24.74	18.6679	3.05576	-0.92	2.27207	110.245	98.1566	NaN	NaN	NaN	NaN	NaN	0.890727	10	0.348624	1.86242
BCM	Ublcp1	heterozygote	male	22.75	20.875	3.1	25.2125	25.5125	17.223	4.25526	0.3	2.25732	107.653	104.207	NaN	NaN	NaN	NaN	NaN	0.968135	10.25	0.348384	1.86113
BCM	Cox5b	heterozygote	male	22.75	21	3.1	25.1	24.9143	17.7936	3.51252	-0.185714	2.25242	107.788	102.666	NaN	NaN	NaN	NaN	NaN	0.952898	11	0.347132	1.85445
BCM	Rnft2	homozygote	male	22.75	21.2333	3.1	27.34	26.78	19.4412	3.96167	-0.56	2.32189	108.175	116.301	NaN	NaN	NaN	NaN	NaN	1.09448	11	0.343954	1.83747
WTSI	Arvcf	homozygote	male	21.5	21.0467	3.4	31.74	31.1	25.6021	5.96019	-0.64	2.35761	115.281	98.6991	1587.78	2285.83	0.191119	0.158095	2.71878	0.855533	11.6	0.248273	1.8336
ICS	Cflar	heterozygote	male	21	21	3.145	22.7429	23.4857	13.268	3.87836	0.742857	2.15873	102.688	100.591	590.584	963.513	0.23619	0.124048	3.10795	0.97928	11	0.246329	1.81924
RBRC	Trpc5	hemizygote	male	23	20.1133	3.339	26.8	27.12	NaN	NaN	0.32	2.10553	101.389	93.7255	284.01	284.562	0.164952	0.159333	2.30445	0.922795	11.6	0.246244	1.81861
BCM	Ddx39	heterozygote	male	22.75	21.2333	3.1	25.6143	25.4	18.9223	3.21538	-0.214286	2.26208	108.294	102.949	NaN	NaN	NaN	NaN	NaN	0.949839	10.4286	0.340113	1.81695
WTSI	4933434E20Rik	heterozygote	male	21	21.4286	3.4	28.8143	28.6571	23.4855	4.50662	-0.157143	2.25998	109.413	98.5109	372.785	569.79	0.209932	3.79184	2.98641	0.901154	11.1429	0.245258	1.81133
BCM	Bbox1	homozygote	male	22.75	21	3.1	26.8667	26.8	NaN	NaN	-0.0666667	2.3014	110.331	104.189	NaN	NaN	NaN	NaN	NaN	0.944232	10	0.338819	1.81003
ICS	Prrt2	homozygote	male	21	21	3.145	24.6333	25.7	19.6432	3.20763	1.06667	2.21862	105.5	103.515	1047.33	1641.21	0.284444	0.14873	3.74291	0.980051	10	0.244228	1.80372
BCM	Cdipt	heterozygote	male	22.75	22.25	3.1	26.7125	26.825	17.5423	5.51271	0.1125	2.29309	109.47	105.462	NaN	NaN	NaN	NaN	NaN	0.963553	11	0.335503	1.79232
BCM	Mboat4	homozygote	male	22.75	21.2333	3.1	25.8714	26.0714	18.3025	3.75826	0.2	2.26219	108.894	100.837	NaN	NaN	NaN	NaN	NaN	0.926298	10.4286	0.331884	1.77299
ICS	Kcnip3	homozygote	male	21	21	3.145	23.76	24.96	NaN	NaN	1.2	2.17368	103.368	101.4	651.073	1056.25	0.279952	0.136455	3.6838	0.98054	10	0.238166	1.75895
UC Davis	Krtap17-1	homozygote	male	24.15	30.3	3.1	26.7257	27.3171	21.0486	4.38437	0.591429	2.16389	104.049	96.8605	NaN	NaN	NaN	NaN	NaN	0.931849	10.8571	0.3263	1.74316
MARC	Usp10	heterozygote	male	24	21.375	NaN	26.8286	28.6714	19.1365	6.7385	1.84286	2.17737	103.977	100.025	NaN	NaN	NaN	NaN	NaN	0.962301	11	0.323533	1.72838
BCM	Paqr6	homozygote	male	22.75	21	3.1	27.025	27.625	18.5186	4.58604	0.6	2.28938	109.179	105.697	NaN	NaN	NaN	NaN	NaN	0.967725	10.5	0.321663	1.71839
MARC	Lsm14a	heterozygote	male	24	21.5795	NaN	25.8364	25.9182	18.8161	6.21237	0.0818182	2.14328	105.401	87.5853	NaN	NaN	NaN	NaN	NaN	0.843786	11	0.321626	1.71819
BCM	Vps37d	heterozygote	male	22.75	20.875	3.1	25.5375	25.55	17.4467	4.07814	0.0125	2.24081	107.064	102.736	NaN	NaN	NaN	NaN	NaN	0.959809	10.5	0.321341	1.71666
BCM	Dhx40	homozygote	male	22.75	21	3.1	26.1667	25.7667	19.4527	3.10204	-0.4	2.2601	108.57	101.541	NaN	NaN	NaN	NaN	NaN	0.935192	10.8333	0.320218	1.71067
BCM	Nadk	heterozygote	male	22.75	21.2333	3.1	26.8714	27.0571	19.717	3.18242	0.185714	2.27937	109.565	102.157	NaN	NaN	NaN	NaN	NaN	0.932729	10	0.316631	1.6915
ICS	Adipor1	homozygote	male	21	21	3.145	22.1857	22.7857	17.3298	2.69467	0.6	2.15821	103.019	99.2987	1104.38	1712.49	0.253129	0.105578	3.33085	0.96371	10	0.228359	1.68652
BCM	Rims3	homozygote	male	22.75	21.2333	3.1	26.8286	27.1286	19.1485	3.4564	0.3	2.27573	109.03	103.278	NaN	NaN	NaN	NaN	NaN	0.947851	10	0.314386	1.67951
BCM	Fbxo31	homozygote	male	22.75	21.9	3.1	28.85	29.07	19.438	5.50465	0.22	2.34078	111.444	108.735	NaN	NaN	NaN	NaN	NaN	0.977316	10.8	0.313871	1.67676
MRC Harwell	Emc8	heterozygote	male	20.375	20.825	NaN	28.925	27.9488	22.6669	5.09413	-0.97625	2.38502	115.35	104.375	2393.43	3462.54	NaN	NaN	NaN	0.905249	10.125	0.226169	1.67035
BCM	Ap1ar	homozygote	male	22.75	21.2333	3.1	26.86	26.16	20.1067	3.18242	-0.7	2.27439	108.334	105.468	NaN	NaN	NaN	NaN	NaN	0.972378	10.2	0.312024	1.66689
ICS	Cx3cl1	homozygote	male	21	21	3.145	23.6375	24.8	13.249	5.31722	1.1625	2.16669	101.977	104.848	794.023	1266.57	0.288333	0.126259	3.79409	1.02801	9.75	0.225621	1.6663
ICS	Olig1	homozygote	male	21	20.75	3.145	24.4	25.225	18.6999	3.65033	0.825	2.19665	104.184	103.458	1146.64	1736.95	0.279107	0.154762	3.67268	0.993342	11	0.223157	1.6481
BCM	Celf6	homozygote	male	22.75	20.8889	3.1	24.6	24.7778	17.202	3.72489	0.177778	2.19519	104.345	102.565	NaN	NaN	NaN	NaN	NaN	0.982233	10.5556	0.306122	1.63536
RBRC	Ikzf3	homozygote	male	23	20.0476	3.339	26.4714	26.9857	19.1225	4.44969	0.514286	2.07286	100.305	90.5285	302.293	304.014	0.165	0.171565	2.30511	0.899812	11	0.219177	1.61871
ICS	Phf8	heterozygote	male	21	21	3.145	28.325	29.05	NaN	NaN	0.725	2.25523	108.477	100.818	898.409	1405.13	0.264405	0.119048	3.47922	0.929569	10.5	0.218498	1.61369
BCM	Hoxb13	heterozygote	male	22.75	21.2333	3.1	24.9455	25.2	17.5277	3.84493	0.254545	2.20233	106.33	97.0383	NaN	NaN	NaN	NaN	NaN	0.91472	11	0.302059	1.61366
UC Davis	Abca8b	homozygote	male	24.15	36.2667	3.1	30.18	31.14	NaN	NaN	0.96	2.10252	100.984	94.518	414.554	850.695	0.111108	0.0518154	1.44111	0.935653	10.6	0.217552	1.60671
BCM	Ascc2	heterozygote	male	22.75	21	3.1	26.2824	26.5235	18.3721	4.02678	0.241176	2.2427	107.012	103.332	NaN	NaN	NaN	NaN	NaN	0.966476	10.6471	0.299066	1.59767
BCM	Cfap299	homozygote	male	22.75	21.125	3.1	26.2	25.975	19.05	3.43557	-0.225	2.23799	107.07	102.108	NaN	NaN	NaN	NaN	NaN	0.951856	10.125	0.29703	1.58679
TCP	Zfp260	homozygote	male	26.2	20.9	3.1	24.91	26.65	20.569	3.9472	1.74	2.01232	95.3352	95.1536	1753.69	4174.17	0.339048	NaN	4.39758	0.998096	10	0.212371	1.56844
BCM	Pmepa1	homozygote	male	22.75	21.2333	3.1	22.7667	22.6	16.6063	2.66585	-0.166667	2.12307	102.284	94.3247	NaN	NaN	NaN	NaN	NaN	0.922918	11	0.293462	1.56773
MRC Harwell	Fbxo11	heterozygote	male	20.5714	21.6881	NaN	27.1143	26	NaN	NaN	-1.38	2.36004	113.802	104.494	3070.01	4384.23	NaN	NaN	NaN	0.917023	11	0.211819	1.56437
RBRC	Dbn1	heterozygote	male	23	19.9048	3.339	26.3857	27.1857	19.2145	4.35211	0.8	2.06088	99.3958	91.1774	262.537	264.272	0.171071	0.18373	2.38993	0.916825	11.4286	0.210345	1.55348
ICS	Sh3tc1	homozygote	male	21	21	3.145	23.4	24.3	18.9072	2.46899	0.9	2.14795	102.028	100.614	887.034	1395.05	0.273274	0.124762	3.59592	0.986315	10	0.206625	1.526
BCM	Tmem132a	heterozygote	male	22.75	21.125	3.1	26.35	25.9625	17.4337	4.8176	-0.3875	2.22926	107.37	99.1521	NaN	NaN	NaN	NaN	NaN	0.924663	11	0.283437	1.51418
WTSI	Ap4m1	homozygote	male	21	20.8333	3.4	28.2667	28.3167	23.5109	4.78377	0.05	2.21625	106.636	98.957	522.814	761.307	0.20963	3.48651	2.98211	0.928521	12	0.204885	1.51316
UC Davis	Cox15	heterozygote	male	24.15	24.9	3.1	27.99	28.0167	20.9374	6.0695	0.0266667	2.03188	97.973	89.982	174.623	446.123	0.0568651	0.026746	0.737563	0.91883	10	0.204402	1.50959
BCM	Cts6	homozygote	male	22.75	23	3.1	24.6571	24.8571	17.4209	3.44574	0.2	2.1726	103.809	99.5965	NaN	NaN	NaN	NaN	NaN	0.96104	10	0.281677	1.50477
BCM	Gstcd	homozygote	male	22.75	21.2333	3.1	26.0857	25.9714	18.7004	3.21605	-0.114286	2.21862	107.515	96.3356	NaN	NaN	NaN	NaN	NaN	0.89577	10.5714	0.281364	1.5031
ICS	Kif5c	heterozygote	male	21	21	3.145	26.5857	28.1143	19.9624	3.90692	1.52857	2.21433	105.896	101.175	1034.91	1610.05	0.268912	0.156735	3.53852	0.955062	11	0.203433	1.50244
BCM	Gnai1	homozygote	male	22.75	21.2333	3.1	26.5	26.5	19.4241	2.93819	-1.77636e-15	2.23168	107.628	98.7563	NaN	NaN	NaN	NaN	NaN	0.917228	10.25	0.280993	1.50112
BCM	Dnajc15	homozygote	male	22.75	21	3.1	26.66	26.28	18.0114	4.72675	-0.38	2.23599	107.015	101.868	NaN	NaN	NaN	NaN	NaN	0.951458	10.8	0.280106	1.49638
MRC Harwell	Ap4e1	homozygote	male	20.5437	21.3625	NaN	27.7875	26.5825	21.7738	4.58554	-1.205	2.3881	115.345	105.061	3609.4	4993	NaN	NaN	NaN	0.911171	10.75	0.202503	1.49556
BCM	Fbxw9	homozygote	male	22.75	21	3.1	26.85	26.86	19.2573	3.73546	0.01	2.24171	107.133	102.687	NaN	NaN	NaN	NaN	NaN	0.957672	10.7	0.279668	1.49404
BCM	Ogfod3	heterozygote	male	22.75	20.6667	3.1	24.9667	24.7	17.7092	4.90408	-0.266667	2.17816	105.503	94.7624	NaN	NaN	NaN	NaN	NaN	0.898078	10.6667	0.277206	1.48089
BCM	Fgf3	heterozygote	male	22.75	21.2333	3.1	25	25.2571	18.3926	3.06282	0.257143	2.17739	104.642	97.6604	NaN	NaN	NaN	NaN	NaN	0.934114	10	0.275349	1.47097
MRC Harwell	F2	homozygote	male	20.7	21.5333	NaN	28.5	29.17	22.8748	4.23944	0.67	2.33385	112.13	104.792	2353.61	3514.82	NaN	NaN	NaN	0.934561	11	0.198428	1.46547
MRC Harwell	Commd9	heterozygote	male	20.7812	21.7667	NaN	27.9475	26.6612	22.1663	4.27256	-1.28625	2.30336	111.238	101.38	2238.33	3243.54	NaN	NaN	NaN	0.911671	10.5	0.193112	1.42621
MRC Harwell	Nrxn1	heterozygote	male	20.55	21.9333	NaN	30.84	NaN	26.2657	5.28718	NaN	2.39376	115.644	105.215	2675.65	3847.23	NaN	NaN	NaN	0.911074	10	0.192727	1.42337
BCM	Ccdc180	heterozygote	male	22.75	21.2333	3.1	26.025	26.5875	18.2172	3.91057	0.5625	2.19973	105.069	100.968	NaN	NaN	NaN	NaN	NaN	0.961153	10.125	0.264446	1.41272
BCM	Aph1a	heterozygote	male	22.75	21.2333	3.1	26.1667	26.3	18.8715	3.29174	0.133333	2.20412	105.352	100.91	NaN	NaN	NaN	NaN	NaN	0.958854	10.6667	0.264241	1.41162
UC Davis	Slc39a7	heterozygote	male	24.15	33.4333	3.1	28.228	28.778	20.3568	6.72709	0.55	2.03934	98.2666	90.5461	438.033	880.67	0.0537667	0.0478867	0.697375	0.920116	11	0.1909	1.40987
HMGU	Gria1	homozygote	male	21.9	20.6667	3.339	24.3125	23.35	15.2931	6.64637	-0.9625	2.21595	107.226	96.7877	NaN	NaN	0.154167	NaN	2.15377	0.902263	10.125	0.263101	1.40553
BCM	Rbm34	homozygote	male	22.75	21.2333	3.1	25.4714	25.4429	17.4302	4.49409	-0.0285714	2.18022	104.117	100.143	NaN	NaN	NaN	NaN	NaN	0.961763	10.4286	0.262888	1.4044
BCM	Tspyl2	hemizygote	male	22.75	20.6875	3.1	27.225	26.6125	17.9625	5.29287	-0.6125	2.23644	108.321	97.3148	NaN	NaN	NaN	NaN	NaN	0.89677	10.375	0.262238	1.40093
MARC	Zswim1	homozygote	male	24	31.8542	NaN	25.675	26.6	22.2966	3.71026	0.925	2.0786	100.599	90.7215	NaN	NaN	NaN	NaN	NaN	0.901151	11.375	0.262185	1.40064
ICS	Pdpr	homozygote	male	21	21	3.145	23.2429	24	17.8462	3.22169	0.757143	2.12152	100.301	101.056	779.513	1244.36	0.262517	0.132286	3.45438	1.00696	10.4286	0.188903	1.39512
BCM	Zscan21	homozygote	male	22.75	21.2333	3.1	25.4	27.7	18.8918	3.07331	2.3	2.17566	106.009	92.4154	NaN	NaN	NaN	NaN	NaN	0.871765	10	0.260643	1.39241
MARC	Uchl5	heterozygote	male	24	21.75	NaN	30.5857	30.6286	20.8182	8.616	0.0428571	2.23599	109.058	94.5921	NaN	NaN	NaN	NaN	NaN	0.880605	11	0.260301	1.39058
MARC	Htr2b	heterozygote	male	24	21.75	NaN	28.8571	29.1571	19.4348	8.69955	0.3	2.1796	104.79	97.6123	NaN	NaN	NaN	NaN	NaN	0.922186	10	0.259972	1.38882
UC Davis	Cldn18	homozygote	male	24.15	23.2333	3.1	25.74	25.95	NaN	NaN	0.21	1.98117	95.1647	89.0289	411.833	710.024	0.117143	0.0657143	1.51939	0.935525	10	0.187163	1.38227
BCM	Wbp1l	homozygote	male	22.75	21.2333	3.1	25.1857	25.2	18.2334	3.16138	0.0142857	2.16649	105.351	92.7824	NaN	NaN	NaN	NaN	NaN	0.8813	11	0.258427	1.38057
BCM	Bicdl1	heterozygote	male	22.75	21.2333	3.1	24.8167	24.8667	17.6217	3.58749	0.05	2.15227	103.638	95.8108	NaN	NaN	NaN	NaN	NaN	0.925114	10.1667	0.256173	1.36853
UC Davis	Socs1	heterozygote	male	24.15	32.8667	3.1	25.535	25.235	19.8884	4.73246	-0.3	1.98398	95.4793	88.5168	455.305	943.737	0.104492	0.0428814	1.3553	0.92699	10	0.185136	1.3673
TCP	Pik3c2a	heterozygote	male	26.6	20.9917	3.1	28.0237	28.425	22.1494	4.83747	0.40125	1.96889	95.0063	86.9408	990.612	2715.76	0.164422	NaN	2.13262	0.91582	10.375	0.184942	1.36587
UC Davis	Lipe	homozygote	male	24.15	24.9	3.1	28.57	28.81	22.7114	4.22018	0.24	2.02407	97.4223	90.2553	219.988	495.69	0.0571429	0.0338095	0.741166	0.926433	11	0.183529	1.35543
BCM	Ctdspl2	heterozygote	male	22.75	21.1429	3.1	27.4	27.4571	20.3151	2.95344	0.0571429	2.2333	106.878	101.776	NaN	NaN	NaN	NaN	NaN	0.947328	10.2857	0.253416	1.3538
WTSI	Ap4e1	homozygote	male	21	21.7143	3.4	28.8857	27.9286	23.3597	4.7366	-0.957143	2.23028	107.977	97.2071	1050.88	1392.58	0.162245	3.60816	2.30803	0.900047	11.4286	0.183195	1.35297
BCM	Oasl1	homozygote	male	22.75	21.2333	3.1	23.7333	23.9333	16.9873	3.33282	0.2	2.11206	101.275	95.5436	NaN	NaN	NaN	NaN	NaN	0.947711	11	0.251106	1.34146
UC Davis	Fgf15	heterozygote	male	24.15	24.9	3.1	26.2433	26.4967	21.3324	3.91638	0.253333	1.97537	94.9103	88.683	150.032	456.929	0.0542063	0.0388095	0.703078	0.9372	10	0.181186	1.33813
BCM	Lamtor5	heterozygote	male	22.75	21.1333	3.1	25.4714	25.5	18.9103	3.12071	0.0285714	2.16359	103.725	97.9473	NaN	NaN	NaN	NaN	NaN	0.940929	10.4286	0.246256	1.31555
BCM	Ism2	homozygote	male	22.75	21.1667	3.1	24.7571	24.6857	17.4215	3.45228	-0.0714286	2.13981	103.122	94.9591	NaN	NaN	NaN	NaN	NaN	0.919203	10.5714	0.245647	1.31229
MRC Harwell	Usp54	homozygote	male	20.3	21.6	NaN	28.9375	28.7675	23.1829	4.70091	-0.17	2.33604	111.822	106.361	2293.32	3340.51	NaN	NaN	NaN	0.950897	11	0.177567	1.3114
HMGU	Syde1	heterozygote	male	21.95	20.6667	3.339	25.4143	24.7714	15.9449	6.93279	-0.642857	2.22914	108.014	96.8322	NaN	NaN	0.123129	NaN	1.72016	0.893137	10.5714	0.244855	1.30806
BCM	Kyat1	heterozygote	male	22.75	21.2333	3.1	25.7	25.8875	18.8471	3.56511	0.1875	2.16892	104.118	97.7011	NaN	NaN	NaN	NaN	NaN	0.939341	10.625	0.244179	1.30445
BCM	Bcl7a	heterozygote	male	22.75	21.1167	3.1	26.2833	26.6167	19.1879	3.31724	0.333333	2.18761	104.388	100.778	NaN	NaN	NaN	NaN	NaN	0.963996	10.1667	0.24395	1.30323
BCM	Has3	homozygote	male	22.75	21.1095	3.1	25.6714	25.7143	19.105	3.12286	0.0428571	2.16696	103.682	98.8294	NaN	NaN	NaN	NaN	NaN	0.953693	10.2857	0.243146	1.29893
UC Davis	Abca8b	homozygote	male	24.15	27.7667	3.1	29.215	29.155	NaN	NaN	-0.06	2.1589	103.94	96.1682	NaN	NaN	NaN	NaN	NaN	0.925363	11	0.24057	1.28517
BCM	Ppara	homozygote	male	22.75	21.2333	3.1	25.8	25	NaN	NaN	-0.8	2.16845	104.026	97.9265	NaN	NaN	NaN	NaN	NaN	0.941369	11	0.240461	1.28459
BCM	Nr1d1	homozygote	male	22.75	21.5714	3.1	23.6714	23.7857	17.5335	2.62151	0.114286	2.09812	101.046	93.3452	NaN	NaN	NaN	NaN	NaN	0.922207	10.1429	0.239172	1.2777
UC Davis	Arl10	heterozygote	male	24.15	26.6333	3.1	30.02	31.37	24.0813	3.96689	1.35	2.18286	102.307	107.164	NaN	NaN	NaN	NaN	NaN	1.04747	10	0.238419	1.27368
BCM	Zfp111	homozygote	male	22.75	21.1167	3.1	24.7625	24.6875	17.5769	3.30607	-0.075	2.13186	102.78	94.4581	NaN	NaN	NaN	NaN	NaN	0.917143	10.375	0.237523	1.26889
MRC Harwell	Grin3a	homozygote	male	20.2688	21.7792	NaN	27.475	26.2143	22.1549	4.75149	-1.01429	2.3145	111.992	101.1	2542.1	3646.5	NaN	NaN	NaN	0.902858	10.75	0.171074	1.26345
BCM	Gcdh	homozygote	male	22.75	21.2333	3.1	24.9667	25.5333	18.0304	3.51581	0.566667	2.13709	103.677	92.3935	NaN	NaN	NaN	NaN	NaN	0.888637	11	0.236132	1.26146
ICS	Cdkl5	heterozygote	male	21	21	3.145	24.02	23.81	NaN	NaN	-0.21	2.11647	102.464	92.2591	729.814	1199.38	0.205667	0.119405	2.7063	0.900518	11	0.170545	1.25954
MRC Harwell	Fam151b	homozygote	male	19.3389	20.8148	NaN	27.5333	27.4611	21.5475	3.73639	-0.0722222	2.38293	114.078	108.455	2871.22	4149.42	NaN	NaN	NaN	0.949491	10.2222	0.170245	1.25733
WTSI	Cand2	homozygote	male	21.5	20.75	3.4	29.48	28.56	25.0445	4.52947	-0.92	2.22417	109.528	90.36	1313.83	1972.78	0.178032	0.159048	2.53261	0.823892	12	0.17023	1.25721
BCM	Il1rl1	homozygote	male	22.75	21.2333	3.1	25.1667	25.1667	18.2756	3.19898	0	2.14141	102.273	98.3287	NaN	NaN	NaN	NaN	NaN	0.961991	10.6667	0.233965	1.24988
MRC Harwell	Nrxn1	homozygote	male	20.4937	21.9354	NaN	25.45	24.4871	20.5076	3.67038	-0.87	2.25958	109.354	98.6317	2568.99	3597.66	NaN	NaN	NaN	0.901765	10.375	0.168971	1.24792
BCM	Scarb1	heterozygote	male	22.75	21	3.1	28.35	28.325	19.2028	4.60836	-0.025	2.24388	106.844	104.187	NaN	NaN	NaN	NaN	NaN	0.97674	11	0.23319	1.24574
HMGU	Camk2b	heterozygote	male	22.2125	20.6667	3.339	27.025	25.85	17.647	6.9023	-1.175	2.2454	108.615	98.2024	NaN	NaN	0.140476	NaN	1.96251	0.902826	10.75	0.23145	1.23645
BCM	Wdr59	heterozygote	male	22.75	21	3.1	26.5714	25.8571	18.4237	4.12218	-0.714286	2.18339	105.395	96.2765	NaN	NaN	NaN	NaN	NaN	0.915075	10.2857	0.23038	1.23074
BCM	Dsg2	homozygote	male	22.75	21.2333	3.1	24.3	24.4667	17.3208	3.43304	0.166667	2.10965	100.768	96.8293	NaN	NaN	NaN	NaN	NaN	0.96332	10	0.230318	1.23041
BCM	Cacna1i	homozygote	male	22.75	21.2857	3.1	25.8214	25.4857	18.4309	3.31316	-0.335714	2.15848	103.777	96.6595	NaN	NaN	NaN	NaN	NaN	0.931608	10.7143	0.229797	1.22762
MRC Harwell	Mapk11	homozygote	male	20.1083	20.7972	NaN	26.9667	26.348	22.6571	3.93495	-0.612	2.28988	110.267	101.929	2136.5	3162.98	NaN	NaN	NaN	0.924378	10.3333	0.165986	1.22587
HMGU	Dnajb11	homozygote	male	22.45	20.75	3.339	27.8	24.5	23.1667	2.50972	-3.3	2.24702	109.298	96.1191	NaN	NaN	0.0857143	NaN	1.19746	0.879425	10	0.228355	1.21992
ICS	Sez6l2	homozygote	male	21	21	3.145	24.0429	24.7571	NaN	NaN	0.714286	2.12977	101.602	98.2032	1098.39	1706.88	0.245578	0.177063	3.23149	0.964352	11.5714	0.164299	1.21341
BCM	Mmp15	homozygote	male	22.75	21.2333	3.1	25.1714	25.5143	18.2294	3.09707	0.342857	2.13409	102.523	95.8556	NaN	NaN	NaN	NaN	NaN	0.936061	10.4286	0.226494	1.20997
BCM	Fbxl16	heterozygote	male	22.75	21	3.1	25.2875	25.15	17.6571	4.14282	-0.1375	2.13776	102.179	97.875	NaN	NaN	NaN	NaN	NaN	0.957587	10.75	0.226395	1.20944
BCM	Hibadh	homozygote	male	22.75	21.2333	3.1	24.3333	24.0333	17.8545	2.79364	-0.3	2.10622	100.652	96.501	NaN	NaN	NaN	NaN	NaN	0.957923	10.5	0.2258	1.20627
MRC Harwell	Trp53bp2	heterozygote	male	19.9937	20.6833	NaN	28.4875	27.0712	NaN	NaN	-1.41625	2.38375	115.655	103.014	3488.17	4816.28	NaN	NaN	NaN	0.890011	11	0.162197	1.19789
BCM	Qrfpr	homozygote	male	22.75	21.2333	3.1	26.9	27.1	18.7084	3.74024	0.2	2.18763	105.322	97.4507	NaN	NaN	NaN	NaN	NaN	0.925397	10.3333	0.22396	1.19644
ICS	Gpr108	homozygote	male	21	21	3.145	22.4857	23.2	14.9647	2.76988	0.714286	2.06998	97.9019	98.467	592.286	978.006	0.270204	0.119444	3.55553	1.00551	10	0.161994	1.19639
UC Davis	Fjx1	homozygote	male	24.15	23.2333	3.1	26.11	26.61	NaN	NaN	0.5	1.96623	94.7479	87.2867	376.5	805.667	0.0969048	0.0580952	1.25689	0.921252	10	0.161489	1.19266
MRC Harwell	Creld2	homozygote	male	19.4273	20.9091	NaN	27.2273	26.8245	20.912	4.31647	-0.402727	2.35637	114.165	102.407	2842.57	3980.38	NaN	NaN	NaN	0.897473	10	0.160628	1.1863
TCP	Lypd3	homozygote	male	26.9167	21.2667	3.1	25.4833	26.1067	20.124	4.81563	0.623333	1.89344	91.4673	83.2457	1350.82	3107.85	0.161905	NaN	2.09997	0.9116	10.6667	0.160499	1.18535
BCM	Sbk1	homozygote	male	22.75	21.2333	3.1	23.2	22.95	17.19	2.78169	-0.25	2.06526	98.6476	94.7909	NaN	NaN	NaN	NaN	NaN	0.961912	10.5	0.221601	1.18383
ICS	Nox1	hemizygote	male	21	21	3.145	23.5333	24.2667	18.0637	2.95776	0.733333	2.08593	99.3788	96.6515	561.258	935.977	0.245	0.124524	3.22388	0.972992	10.5	0.159313	1.17659
HMGU	Wrnip1	homozygote	male	21.6	20.6667	3.339	26.59	26.28	NaN	NaN	-0.31	2.27267	108.721	103.719	NaN	NaN	0.190952	NaN	2.66768	0.954256	10.9	0.220145	1.17605
BCM	Ctdspl2	homozygote	male	22.75	21	3.1	24.4	23.6	17.5716	3.00448	-0.8	2.10268	100.815	95.1526	NaN	NaN	NaN	NaN	NaN	0.943831	10	0.220097	1.1758
BCM	Ntn4	homozygote	male	22.75	21	3.1	24.9714	24.6571	17.317	4.03973	-0.314286	2.11934	101.253	97.195	NaN	NaN	NaN	NaN	NaN	0.960505	10.4286	0.218229	1.16582
MARC	Otud6a	homozygote	male	24	21.375	NaN	29.8143	29.1571	NaN	NaN	-0.657143	2.16764	103.802	98.548	NaN	NaN	NaN	NaN	NaN	0.950024	11	0.216971	1.1591
BCM	Exoc6	homozygote	male	22.75	21.2333	3.1	18.6	18.4	13.9935	2.34673	-0.2	1.91105	91.1549	88.164	NaN	NaN	NaN	NaN	NaN	0.967189	10	0.216585	1.15704
TCP	Dbndd2	homozygote	male	26.25	20.9524	3.1	28.0543	28.44	22.7599	4.71518	0.385714	1.9442	93.3155	87.6298	882.895	2303.87	0.164127	NaN	2.12879	0.939231	10.7143	0.15665	1.15692
UC Davis	Fbxo41	homozygote	male	24.15	27.2	3.1	28.1157	28.72	NaN	NaN	0.604286	2.09453	100.215	95.5332	NaN	NaN	NaN	NaN	NaN	0.956979	10.8571	0.211854	1.13176
BCM	Rhoh	homozygote	male	22.75	21.2333	3.1	24.45	24.45	17.7361	3.33094	8.88178e-16	2.09491	100.116	95.9659	NaN	NaN	NaN	NaN	NaN	0.958461	10.5	0.21071	1.12565
BCM	Akap7	homozygote	male	22.75	21.2333	3.1	25.0429	25.5714	17.8347	3.64759	0.528571	2.11389	100.805	97.6147	NaN	NaN	NaN	NaN	NaN	0.969557	10.5714	0.210463	1.12433
WTSI	Zranb1	homozygote	male	21.5	20.8976	3.4	28.6143	27.9571	24.775	4.24173	-0.657143	2.19699	106.56	95.0617	1447.37	2193.07	0.202857	0.160544	2.88576	0.891779	12	0.151458	1.11858
BCM	Fmnl3	homozygote	male	22.75	21.2333	3.1	24.2	24.4667	17.7952	2.44504	0.266667	2.08471	100.524	92.3097	NaN	NaN	NaN	NaN	NaN	0.918432	10	0.208619	1.11448
TCP	Man2b2	homozygote	male	25.9812	21.5875	3.1	28.0938	27.7912	21.8344	5.28128	-0.3025	1.94548	94.226	84.6629	698.581	2094.64	0.137468	NaN	1.78301	0.898714	10.375	0.150829	1.11393
WTSI	Myh7b	homozygote	male	21	20.7143	3.4	28.6	28.1571	23.8248	4.03318	-0.442857	2.16449	104.13	96.6994	421.851	657.545	0.180476	3.74966	2.56738	0.928514	11.4286	0.150591	1.11218
MRC Harwell	Sdc4	homozygote	male	20.16	21.77	NaN	28.1	27.398	22.8399	4.61582	-0.702	2.29775	110.539	102.659	2269.62	3309.1	NaN	NaN	NaN	0.929304	10.8	0.149211	1.10199
UC Davis	Lama4	homozygote	male	24.15	26.6333	3.1	24.9243	25.37	19.76	3.8475	0.445714	1.98518	94.4915	92.2944	NaN	NaN	NaN	NaN	NaN	0.977101	10.4286	0.206011	1.10055
HMGU	Scmh1	homozygote	male	21.7357	20.6667	3.339	27.1429	26.4571	NaN	NaN	-0.685714	2.26475	109.512	99.1859	NaN	NaN	0.152381	NaN	2.12882	0.905791	10.7143	0.205966	1.10031
BCM	Gpr173	hemizygote	male	22.75	21.8905	3.1	22.3143	22.6429	15.4831	3.21797	0.328571	2.0203	96.355	93.2445	NaN	NaN	NaN	NaN	NaN	0.966914	11	0.20537	1.09713
MRC Harwell	Ncoa3	heterozygote	male	20.4187	21.8167	NaN	27.3475	26.9887	20.9551	5.53554	-0.35875	2.28531	110.715	99.3446	2635.07	3754.34	NaN	NaN	NaN	0.897671	10.75	0.148222	1.09468
ICS	Rrp1b	homozygote	male	21	21	3.145	25.2125	26.225	19.3448	3.14346	1.0125	2.12289	101.472	97.1818	865.17	1365.59	0.260417	0.141293	3.42674	0.958434	11	0.147699	1.09081
BCM	Esyt2	homozygote	male	22.75	21.2333	3.1	27.175	27.05	19.9704	3.46057	-0.125	2.17667	105.017	96.1703	NaN	NaN	NaN	NaN	NaN	0.916523	10.25	0.20408	1.09024
UC Davis	Coro1a	homozygote	male	24.15	28.5333	3.1	29.3867	29.8167	22.3244	5.87921	0.43	2.02053	97.0509	90.8134	478.354	937.725	0.0902645	0.0599841	1.17077	0.935571	11	0.147585	1.08998
MRC Harwell	Ryr2	heterozygote	male	20.7875	21	NaN	29.1125	27.89	21.3507	6.84083	-1.2225	2.30771	111.906	99.9406	2840.15	3986.18	NaN	NaN	NaN	0.89304	10.625	0.147345	1.0882
KMPC	Dbn1	heterozygote	male	22	20	NaN	29.6529	31.2286	NaN	NaN	1.57571	2.26463	106.774	108.917	1511.01	4284.56	0.23415	0.175374	NaN	1.02133	11.7143	0.146768	1.08394
BCM	Il3	homozygote	male	22.75	21.2333	3.1	25.075	25.475	17.5754	4.03004	0.4	2.10729	100.687	96.6063	NaN	NaN	NaN	NaN	NaN	0.959431	10.75	0.202821	1.08351
WTSI	Dact3	homozygote	male	21	21.2857	3.4	25.7143	25.9571	22.0164	3.52429	0.242857	2.10068	100.355	96.3636	364.944	556.543	0.219841	3.74354	3.12737	0.963201	11.7143	0.146274	1.08029
BCM	Ogfod3	homozygote	male	22.75	20.8333	3.1	26.0417	25.6	17.9255	4.28022	-0.441667	2.137	103.339	93.5779	NaN	NaN	NaN	NaN	NaN	0.905352	10.6667	0.201174	1.07471
TCP	S100a14	homozygote	male	26.2	22.7333	3.1	27.1	26.92	22.8336	4.28496	-0.18	1.98002	95.0046	89.3513	1622.76	3971.4	NaN	NaN	NaN	0.940494	11	0.145448	1.07419
MRC Harwell	Slc25a43	hemizygote	male	20.375	21.85	NaN	29.475	27.4275	23.2408	5.9784	-1.8225	2.33353	112.988	101.666	2819.56	3974.82	NaN	NaN	NaN	0.900257	10	0.144777	1.06923
BCM	Spata5	heterozygote	male	22.75	21.2333	3.1	24.9286	24.7429	17.9152	2.85105	-0.185714	2.09986	101.369	92.5699	NaN	NaN	NaN	NaN	NaN	0.913357	10.8571	0.200135	1.06916
BCM	Fastkd2	homozygote	male	22.75	21.2333	3.1	24.76	24.76	17.9326	3.26076	0	2.09389	99.9599	96.3016	NaN	NaN	NaN	NaN	NaN	0.963653	10.8	0.199633	1.06648
BCM	Foxj3	heterozygote	male	22.75	21.1815	3.1	25.5778	25.6778	19.6389	2.5936	0.1	2.11973	101.841	95.1823	NaN	NaN	NaN	NaN	NaN	0.93359	10.2222	0.198945	1.0628
ICS	Tmem50b	homozygote	male	21	21	3.145	22.7571	23.9714	17.5261	2.98559	1.21429	2.07128	98.6299	96.1558	864.162	1369.77	0.263537	0.124286	3.4678	0.975387	10	0.143313	1.05843
TCP	Rnf20	heterozygote	male	26.8813	21.175	3.1	28.485	27.5675	22.269	5.451	-0.9175	1.98168	96.6634	83.7987	1778.33	4323	0.107808	NaN	1.39832	0.866445	10	0.14319	1.05752
BCM	Cacna1i	heterozygote	male	22.75	22	3.1	29.3	29.8	NaN	NaN	0.5	2.23903	106.205	105.412	NaN	NaN	NaN	NaN	NaN	0.992531	11	0.19752	1.05519
BCM	Flywch1	heterozygote	male	22.75	21.2333	3.1	24.9167	24.7833	17.4882	3.47923	-0.133333	2.09656	100.369	95.4223	NaN	NaN	NaN	NaN	NaN	0.949983	10.6667	0.197223	1.0536
BCM	Spo11	homozygote	male	22.75	21.2333	3.1	27.1	26.74	19.086	3.6039	-0.36	2.16706	104.751	95.0444	NaN	NaN	NaN	NaN	NaN	0.906309	10.6	0.196912	1.05194
WTSI	Ssr2	heterozygote	male	21	20.5714	3.4	28.6714	28.7	22.3111	5.61337	0.0285714	2.15813	103.994	95.8097	443.013	683.882	0.210952	3.76939	3.00092	0.920831	11.4286	0.141862	1.04771
RBRC	Rufy3	heterozygote	male	23	19.9762	3.339	29.3571	29.9286	NaN	NaN	0.571429	2.04995	98.6818	91.3613	275.755	276.231	0.175374	0.19068	2.45004	0.925892	11.5714	0.141638	1.04605
TCP	Atp6v1b2	heterozygote	male	27.3562	22.4583	3.1	27.6137	27.6262	21.2542	5.74568	0.0125	1.88014	91.2	81.3241	1044.09	2782.82	0.16145	NaN	2.09407	0.891154	11	0.141591	1.04571
UC Davis	Crygc	homozygote	male	24.15	24.9	3.1	32.55	33.43	22.2671	8.84522	0.88	2.05825	98.4969	93.8139	217.75	509.833	0.0716667	0.0285714	0.929545	0.952455	11	0.140386	1.0368
MRC Harwell	Sort1	heterozygote	male	20.2375	20.95	NaN	28.3125	27.25	21.2555	6.35983	-1.0625	2.29856	111.426	99.6727	2516.57	3580.67	NaN	NaN	NaN	0.895026	10.125	0.139799	1.03247
WTSI	Rnf10	homozygote	male	21	21.7143	3.4	25.4143	24.9857	21.6921	3.55673	-0.428571	2.10047	101.204	93.2899	610.195	885.908	0.208299	3.77075	2.96318	0.923649	11.1429	0.139449	1.02988
WTSI	Sgsm1	homozygote	male	21	21	3.4	28.6857	28.0571	23.7213	4.14376	-0.628571	2.15293	103.996	94.6764	385.266	608.636	0.189728	3.87211	2.69899	0.909731	11.2857	0.139221	1.0282
BCM	Ell3	homozygote	male	22.75	21.2333	3.1	26	26.3667	17.5111	3.9968	0.366667	2.12644	101.645	97.331	NaN	NaN	NaN	NaN	NaN	0.957949	11	0.19196	1.02549
HMGU	Fut1	homozygote	male	21.875	20.6667	3.339	27.7	26.9	17.234	8.3196	-0.8	2.25633	109.042	99.0437	NaN	NaN	0.13869	NaN	1.93756	0.905868	10.25	0.191454	1.02278
BCM	Nup133	heterozygote	male	22.75	21.2333	3.1	26.2857	26.0571	18.7266	3.24483	-0.228571	2.13409	102.742	95.0753	NaN	NaN	NaN	NaN	NaN	0.925196	11.4286	0.190345	1.01686
BCM	Dhx16	heterozygote	male	22.75	21.2333	3.1	26.6857	26.6429	19.227	3.39597	-0.0428571	2.14661	102.811	97.5359	NaN	NaN	NaN	NaN	NaN	0.94953	11	0.189899	1.01448
TCP	Slc52a2	heterozygote	male	27.4062	22.0917	3.1	28.9225	28.9525	22.7688	5.36738	0.03	1.88047	91.1046	81.7356	879.516	2307.68	0.139375	NaN	1.80775	0.894945	10.875	0.137205	1.01331
HMGU	Vgll4	heterozygote	male	22.45	20.6667	3.339	27.5	27.04	16.4401	10.8844	-0.46	2.1971	105.511	98.8254	NaN	NaN	0.161905	NaN	2.26187	0.937311	10	0.188173	1.00525
TCP	Clcf1	heterozygote	male	26.9625	21.5875	3.1	28.7762	29.1825	22.3941	5.53812	0.40625	1.9643	94.522	87.6744	1625.04	4017.73	0.171886	NaN	2.22943	0.927037	11	0.135989	1.00433
HMGU	Tyk2	homozygote	male	22.325	20.6667	3.339	27.9167	27.1167	18.1597	6.87005	-0.8	2.22049	107.423	97.0661	NaN	NaN	0.153175	NaN	2.13991	0.902046	10	0.187296	1.00057
BCM	G3bp1	heterozygote	male	22.75	21.2333	3.1	26.3286	26.6429	18.4818	4.15424	0.314286	2.13077	101.862	97.4942	NaN	NaN	NaN	NaN	NaN	0.957949	10.8571	0.185634	0.991692
BCM	Pla2g4e	heterozygote	male	22.75	21.2333	3.1	24.3	24.3	16.8517	4.09655	0	2.06478	99.3773	92.0873	NaN	NaN	NaN	NaN	NaN	0.926643	11	0.185444	0.990678
BCM	Fgf12	homozygote	male	22.75	21.2333	3.1	24.6429	25.1429	17.8099	3.39797	0.5	2.07538	99.0242	95.6362	NaN	NaN	NaN	NaN	NaN	0.967225	11	0.184925	0.987905
BCM	1700086L19Rik	homozygote	male	22.75	21.2333	3.1	23	22.8857	16.4743	3.20336	-0.114286	2.02207	96.7466	92.2307	NaN	NaN	NaN	NaN	NaN	0.95419	10.2857	0.184895	0.987745
BCM	Pla2g4e	homozygote	male	22.75	21.2333	3.1	24.3	25.1	17.3045	3.77386	0.8	2.06395	97.9193	97.1028	NaN	NaN	NaN	NaN	NaN	0.991661	11	0.184613	0.986236
UC Davis	Emx1	homozygote	male	24.15	23.2333	3.1	26.77	26.745	21.3551	4.42855	-0.025	1.95788	94.0473	87.9789	527.321	995.571	0.116548	0.0707381	1.51167	0.934706	10.5	0.133254	0.98413
BCM	Ash2l	heterozygote	male	22.75	21.2333	3.1	24.7714	25.0286	17.4981	3.64856	0.257143	2.07658	100.741	89.776	NaN	NaN	NaN	NaN	NaN	0.892233	10	0.181951	0.972016
MRC Harwell	Slc17a6	heterozygote	male	20.1938	22.1	NaN	28.95	28.0613	22.689	6.08616	-0.88875	2.31816	112.752	99.1851	2810.3	3933.53	NaN	NaN	NaN	0.88059	10	0.131496	0.971151
HMGU	Paox	homozygote	male	22.35	20.75	3.339	24.9286	24.3	15.2526	4.72519	-0.628571	2.11548	102.602	91.5527	NaN	NaN	0.14966	NaN	2.0908	0.89429	10.2857	0.181352	0.968815
TCP	Hgsnat	homozygote	male	26.175	21.6792	3.1	29.9812	29.7512	24.8884	3.84672	-0.23	1.94239	93.3779	87.0155	644.195	1844.65	NaN	NaN	NaN	0.931067	10.25	0.130976	0.967308
MRC Harwell	Prkab1	homozygote	male	19.7	22	NaN	26.55	25.6667	20.7122	4.90119	-0.883333	2.31905	112.084	101.757	3199.88	4511.48	NaN	NaN	NaN	0.907593	10.8333	0.130813	0.966104
BCM	Zscan21	heterozygote	male	22.75	21.2333	3.1	25.1625	25.8375	18.3869	3.06881	0.675	2.08815	102.328	86.6208	NaN	NaN	NaN	NaN	NaN	0.847102	10	0.180835	0.966056
WTSI	Pepd	homozygote	male	21	21.375	3.4	25.525	24.9625	21.2644	4.2507	-0.5625	2.09115	100.98	92.0744	553.683	813.121	0.170952	3.92798	2.4319	0.912562	11	0.130733	0.965518
HMGU	Thg1l	heterozygote	male	22.35	20.6667	3.339	30.225	28.675	19.7235	7.75095	-1.55	2.28509	111.266	97.3333	NaN	NaN	0.131548	NaN	1.83777	0.874147	10.75	0.179174	0.957184
WTSI	Ldhb	homozygote	male	21	20.8571	3.4	27.1571	26.8	22.8224	4.27239	-0.357143	2.1099	100.973	96.1529	322.377	511.316	0.227506	3.67891	3.2364	0.952482	11	0.129355	0.955341
BCM	Bbox1	heterozygote	male	22.75	21	3.1	25.68	25.94	NaN	NaN	0.26	2.10237	100.512	96.1662	NaN	NaN	NaN	NaN	NaN	0.957326	10	0.178271	0.952359
BCM	Foxj3	homozygote	male	22.75	21	3.1	25.54	25.61	18.3915	4.15497	0.07	2.09697	100.216	96.056	NaN	NaN	NaN	NaN	NaN	0.961198	10.6	0.177419	0.947806
HMGU	Gm4951	homozygote	male	22.4833	20.6667	3.339	27.0167	25.7333	15.8178	9.86009	-1.28333	2.16725	105.138	93.7064	NaN	NaN	0.123016	NaN	1.71858	0.894264	10.6667	0.176869	0.944866
UC Davis	Mctp1	homozygote	male	24.15	23.2333	3.1	27.786	27.92	20.5763	6.09835	0.134	1.98037	95.1485	88.9138	662.538	1216.38	0.0955238	0.0686	1.23898	0.935879	10.6	0.127819	0.943992
BCM	Pak6	homozygote	male	22.75	21.2333	3.1	25.2	25.34	17.5576	4.06425	0.14	2.08507	99.5488	95.8613	NaN	NaN	NaN	NaN	NaN	0.964904	10.8	0.176545	0.943138
BCM	Alg14	heterozygote	male	22.75	21.2333	3.1	26.8429	26.8429	18.4561	4.63894	5.0754e-16	2.13777	102.31	97.4124	NaN	NaN	NaN	NaN	NaN	0.953593	11	0.175962	0.940024
UC Davis	Sik1	homozygote	male	24.15	26.9167	3.1	25.99	26.5012	21.4656	2.9909	0.51125	1.98947	94.5618	92.971	NaN	NaN	NaN	NaN	NaN	0.982487	10.125	0.175735	0.938809
BCM	Cyp2ab1	heterozygote	male	22.75	21.2333	3.1	28.1	27.5	20.7477	2.71935	-0.6	2.17745	106.285	91.8196	NaN	NaN	NaN	NaN	NaN	0.863896	11	0.174864	0.934158
UC Davis	Myrip	homozygote	male	24.15	27.7667	3.1	29.4971	30.0271	20.8271	7.63638	0.53	2.10189	100.931	94.5699	NaN	NaN	NaN	NaN	NaN	0.937286	11	0.174408	0.93172
UC Davis	Scarf2	homozygote	male	24.15	27.4429	3.1	25.28	26.1486	19.6195	4.41582	0.868571	1.96489	94.3217	88.5166	NaN	NaN	NaN	NaN	NaN	0.939668	11	0.17419	0.930559
BCM	Fmnl3	heterozygote	male	22.75	21.2333	3.1	24.1667	24.5667	16.395	4.27618	0.4	2.04847	97.0122	96.9906	NaN	NaN	NaN	NaN	NaN	0.99988	11	0.173461	0.92666
KMPC	Hdac11	homozygote	male	22	20	NaN	29.7963	29.3813	22.3882	6.41366	-0.415	2.29526	110.079	103.759	2002.73	5595.61	0.197024	0.140357	NaN	0.940828	11.25	0.125263	0.92512
TCP	Nhlh1	homozygote	male	27.25	22.7333	3.1	25.37	24.97	NaN	NaN	-0.4	1.83511	88.6236	80.7736	1175.98	3021.3	NaN	NaN	NaN	0.911423	10	0.125253	0.925046
HMGU	Zdhhc5	homozygote	male	21.8278	20.6667	3.339	26.9222	26.0556	17.4277	6.94584	-0.866667	2.21628	106.959	97.8078	NaN	NaN	0.14709	NaN	2.0549	0.914501	10.1111	0.172566	0.92188
BCM	Prdm14	homozygote	male	22.75	21.2474	3.1	26.7263	26.3684	18.5401	4.11521	-0.357895	2.13028	103.037	93.1991	NaN	NaN	NaN	NaN	NaN	0.901855	10.4737	0.172247	0.920175
UC Davis	Alox15	homozygote	male	24.15	23.2333	3.1	28.02	28.81	20.4625	6.79901	0.79	1.96774	93.7834	91.0492	386.976	855.929	0.106905	0.0504762	1.3866	0.970845	11	0.124248	0.917623
TCP	Lmbrd1	heterozygote	male	26.1	21.725	3.1	26.955	26.8038	21.2695	4.21612	-0.15125	1.92899	93.0662	85.2313	1110.12	3124.86	0.154659	NaN	2.00599	0.916398	10	0.123801	0.91432
WTSI	Washc2	heterozygote	male	21	20.2857	3.4	29.9286	29.3857	23.1194	6.26275	-0.542857	2.15948	104.254	95.1748	365.517	563.293	0.176627	3.6449	2.51262	0.912121	11.1429	0.123501	0.912105
BCM	Tarbp1	homozygote	male	22.75	21.2333	3.1	25.1286	25.3429	18.2306	3.35108	0.214286	2.07691	99.0992	95.6999	NaN	NaN	NaN	NaN	NaN	0.9665	10.4286	0.170702	0.911924
WTSI	Pam16	heterozygote	male	21	20.5714	3.4	28.9286	28.2857	22.7041	4.78804	-0.642857	2.13936	103.014	95.2459	350.125	552.821	0.190658	3.81769	2.71222	0.924581	11.1429	0.123072	0.908937
WTSI	1700123O20Rik	homozygote	male	21.5	20.8214	3.4	29.0429	28.3571	23.0626	5.86047	-0.685714	2.17964	106.108	92.9233	1566.94	2273.59	0.164422	0.134014	2.339	0.875846	11.5714	0.12281	0.907002
WTSI	Wrap53	heterozygote	male	21	20.2857	3.4	29.3143	28.7714	24.0216	4.82749	-0.542857	2.1474	103.979	93.5469	379.168	580.301	0.185238	3.79252	2.63512	0.897646	12	0.122637	0.905725
TCP	Epdr1	homozygote	male	26.1812	21.3125	3.1	26.4213	25.49	21.7465	4.33826	-0.93125	1.8646	90.0711	81.9902	641.856	1836.11	0.212056	NaN	2.75045	0.90975	10.625	0.122539	0.905002
WTSI	Ydjc	homozygote	male	21.5	20.3167	3.4	30.425	30.275	26.2792	3.82673	-0.15	2.18831	105.435	97.1976	1183.49	1811.31	0.219643	0.188095	3.12455	0.921704	12	0.122219	0.902634
WTSI	3830406C13Rik	homozygote	male	21	21.25	3.4	29.0375	28.4125	23.9	4.42135	-0.625	2.14052	103.573	93.5049	392.086	557.023	0.20433	3.80298	2.90672	0.901691	11.25	0.12197	0.900798
UC Davis	Emx1	homozygote	male	24.15	26.0667	3.1	26.172	26.188	21.6753	3.14767	0.016	1.98822	95.4369	89.5832	NaN	NaN	NaN	NaN	NaN	0.939096	10	0.168585	0.900614
BCM	Sirpa	homozygote	male	22.75	20.7048	3.1	24.8714	25.4	18.1344	3.14593	0.528571	2.06639	98.5456	95.3975	NaN	NaN	NaN	NaN	NaN	0.96446	10.8571	0.168515	0.900241
UC Davis	Ucn3	homozygote	male	24.15	22.1	3.1	26.4433	26.0767	19.3812	5.46535	-0.366667	1.99557	96.7056	86.6505	NaN	NaN	NaN	NaN	NaN	0.897101	10.6667	0.167132	0.892854
RBRC	Galp	homozygote	male	23	19.9762	3.339	26.2143	27.0714	19.1444	4.35264	0.857143	1.96883	94.8597	87.4492	289.224	290.565	0.170884	0.160381	2.38732	0.922908	11	0.120615	0.890786
ICS	Ogfr	heterozygote	male	21	21	3.145	25.025	25.3	18.8868	3.66071	0.275	2.09005	100.443	93.75	842.807	1318.64	0.240714	0.112721	3.16748	0.934444	10	0.120246	0.888064
UC Davis	Zzef1	homozygote	male	24.15	27.4429	3.1	27.68	28.7829	21.6275	4.38288	1.10286	2.03414	97.5488	91.9805	NaN	NaN	NaN	NaN	NaN	0.943106	10	0.16559	0.884613
TCP	Hook3	heterozygote	male	26.55	21.6333	3.1	29.72	29.16	23.8866	5.3012	-0.56	1.94042	94.4392	82.8094	979.111	2767.62	0.151136	NaN	1.9603	0.8792	10	0.119145	0.879932
BCM	Tbccd1	homozygote	male	22.75	21.1556	3.1	24.8	24.9167	17.8353	3.14739	0.116667	2.06026	99.1433	91.945	NaN	NaN	NaN	NaN	NaN	0.927179	10	0.164711	0.879919
TCP	Atp6v1d	heterozygote	male	26.5813	21.4042	3.1	27.6438	26.5587	23.112	4.16601	-1.085	1.87193	90.3946	82.4206	702.593	2065.32	0.123333	NaN	1.59968	0.911547	10.125	0.118812	0.877475
HMGU	Lsm1	homozygote	male	24.05	20.75	3.339	23.275	22.05	NaN	NaN	-1.225	1.89849	92.881	79.3006	NaN	NaN	0.0940476	NaN	1.31388	0.855671	10.5	0.164217	0.877278
BCM	Zfp609	heterozygote	male	22.75	21.2333	3.1	25.625	26.15	18.4161	3.63773	0.525	2.08621	99.3116	96.9521	NaN	NaN	NaN	NaN	NaN	0.975827	10.25	0.163898	0.875574
UC Davis	Cdh10	homozygote	male	24.15	28.6167	3.1	28.0738	28.105	22.1606	4.48428	0.03125	2.04407	98.0851	92.2169	NaN	NaN	NaN	NaN	NaN	0.939938	10.875	0.162757	0.86948
ICS	Smc5	heterozygote	male	21	21	3.145	26.25	28	18.5762	3.18722	1.75	2.10436	100.667	96.0455	710.856	1157.94	0.284841	0.181667	3.74814	0.953697	10	0.116967	0.863849
RBRC	Ap4e1	homozygote	male	23	20.119	3.339	25.5143	25.8429	18.8128	3.63221	0.328571	1.95056	94.7321	83.9561	265.497	267.361	0.16881	0.190397	2.35833	0.886519	11	0.116726	0.862068
BCM	Tmtc3	heterozygote	male	22.75	21.2333	3.1	25.3857	25.3286	17.3854	4.26548	-0.0571429	2.07584	100.155	91.7065	NaN	NaN	NaN	NaN	NaN	0.915773	10.4286	0.161292	0.86165
MARC	Prickle4	homozygote	male	24	33.7917	NaN	26.3143	26.9429	20.4933	4.54796	0.628571	1.99767	96.3375	88.4162	NaN	NaN	NaN	NaN	NaN	0.916945	10.5714	0.160517	0.857512
UC Davis	Mplkip	homozygote	male	24.15	23.2333	3.1	26.75	26.98	NaN	NaN	0.23	1.94781	93.2893	88.5031	629.603	1193.71	0.12246	0.0584683	1.58836	0.948246	10.3333	0.116106	0.857488
WTSI	Nacc2	homozygote	male	21	21	3.4	28.5714	27.8286	21.9769	6.56097	-0.742857	2.1301	103.252	92.3971	424.883	677.403	0.182925	3.63333	2.60222	0.893857	11.2857	0.116014	0.856811
TCP	Lpin2	homozygote	male	26.2125	21.2667	3.1	25.21	25.0237	19.9226	4.04411	-0.18625	1.89597	91.9232	82.1687	1525.28	3520.24	0.127973	NaN	1.65986	0.893843	10.375	0.115518	0.853143
MRC Harwell	Cabp1	homozygote	male	19.8	21.7	NaN	27.5875	26.19	22.205	3.74077	-1.3975	2.27887	110.673	98.1032	2403.75	3464.21	NaN	NaN	NaN	0.88578	10.5	0.115335	0.851797
MRC Harwell	Pparg	heterozygote	male	20.7875	21.85	NaN	27.525	27.1562	20.7953	5.69092	-0.36875	2.25791	109.154	98.9875	3166.46	4363.15	NaN	NaN	NaN	0.907513	11	0.113991	0.841871
MRC Harwell	Mapkbp1	homozygote	male	18.8625	20.1667	NaN	25.55	24.3575	20.7294	3.23508	-1.1925	2.30343	110.903	102.59	2751.44	3885.21	NaN	NaN	NaN	0.92403	10.75	0.113755	0.840125
ICS	Cd276	homozygote	male	21	21	3.145	23.8875	24.725	18.621	3.45916	0.8375	2.05579	97.3513	97.364	728.352	1166.62	0.236599	0.127483	3.11333	1.00098	10	0.113659	0.839419
TCP	Eprs	heterozygote	male	26.95	21.4762	3.1	27.7343	27.1714	22.176	4.68586	-0.562857	1.83572	88.4499	81.5253	539.414	1725.14	0.168566	NaN	2.18637	0.921474	10.4286	0.113178	0.835863
HMGU	Zfp445	homozygote	male	23.6	20.75	3.339	21.3	20	NaN	NaN	-1.3	1.86438	90.1548	81.6429	NaN	NaN	0.128571	NaN	1.79619	0.905586	11	0.155455	0.830471
BCM	Ldlrad1	homozygote	male	22.75	21.2333	3.1	26.1857	25.8714	18.6349	3.59885	-0.314286	2.09554	100.601	94.3751	NaN	NaN	NaN	NaN	NaN	0.93766	10	0.155044	0.828273
WTSI	Ifi27	homozygote	male	21	20.5714	3.4	30.7286	30.5	23.6912	6.1747	-0.228571	2.16347	104.697	94.4569	377.869	568.767	0.193492	4.01429	2.75254	0.900257	11.7143	0.111848	0.826041
TCP	Dbn1	heterozygote	male	26.5125	21.45	3.1	27.4225	27.455	22.1083	4.60504	0.0325	1.88214	91.0482	82.2989	1023.47	2569.76	0.160574	NaN	2.0827	0.903553	10.375	0.110664	0.817296
BCM	Dcakd	homozygote	male	22.75	21.2333	3.1	25.1	25.06	17.6848	4.05693	-0.04	2.058	97.9081	95.8573	NaN	NaN	NaN	NaN	NaN	0.979224	10	0.152717	0.815845
WTSI	Lrrc71	homozygote	male	21	20.4286	3.4	31.1	30.0286	24.199	6.45539	-1.07143	2.17295	105.775	92.6638	438.674	668.059	0.167755	3.83401	2.38642	0.875807	11	0.110419	0.815488
BCM	Pja2	homozygote	male	22.75	21.2333	3.1	23.6	23.75	17.5176	2.81744	0.15	2.00908	96.3305	90.9072	NaN	NaN	NaN	NaN	NaN	0.943737	10.5	0.152448	0.814409
UC Davis	S100a6	heterozygote	male	24.15	27.5238	3.1	28.4929	28.9671	22.4144	4.86885	0.474286	2.04724	96.7024	97.8287	NaN	NaN	NaN	NaN	NaN	1.02036	10.8571	0.152332	0.813788
HMGU	C4bp	homozygote	male	22.6	20.6667	3.339	28.725	27.9667	15.701	10.9141	-0.566667	2.18803	106.345	93.8929	NaN	NaN	0.136905	NaN	1.91261	0.883445	10	0.152271	0.813463
WTSI	Atp8b2	homozygote	male	21.5	20.8	3.4	28.875	28.4	24.9178	4.45444	-0.475	2.16491	105.173	93.0755	1575.14	2311	0.147083	0.158333	2.09235	0.884624	12	0.109914	0.811758
TCP	Gtpbp2	heterozygote	male	26.15	21.5875	3.1	29.2413	28.9587	21.2619	7.54639	-0.2825	1.95026	95.274	81.9599	1081.99	2961.21	0.10924	NaN	1.41688	0.861923	10.5	0.109761	0.810631
ICS	Ptpra	homozygote	male	21	21	3.145	24.4286	25.2714	19.3788	2.8551	0.842857	2.06005	98.0195	95.9026	684.045	1106.01	0.249592	0.119048	3.2843	0.978006	10	0.109757	0.810598
UC Davis	Uts2b	homozygote	male	24.15	27.4429	3.1	28.8557	29.3329	21.8373	6.02621	0.477143	2.05611	98.5398	93.1981	NaN	NaN	NaN	NaN	NaN	0.946176	11	0.149432	0.798295
HMGU	Pkn2	heterozygote	male	22.7	20.75	3.339	25.1286	24.6714	19.2623	3.50377	-0.457143	2.05983	99.6752	89.9558	NaN	NaN	0.139456	NaN	1.94825	0.902946	10.8571	0.149318	0.797685
HMGU	Pepd	homozygote	male	22.2	20.6667	3.339	23.13	22.19	14.8325	6.44367	-0.94	2.03793	99.3508	86.3794	NaN	NaN	0.114762	NaN	1.60327	0.870196	10.8	0.149235	0.797243
BCM	Nlrp2	homozygote	male	22.75	21.2333	3.1	23.7	23.6	16.9689	3.23942	-0.1	2.0083	95.5063	93.6762	NaN	NaN	NaN	NaN	NaN	0.981625	10.5	0.148429	0.792935
ICS	Mbnl1	homozygote	male	21	21	3.145	24.9167	25.2	NaN	NaN	0.283333	2.05814	97.6364	96.8561	499.598	874.902	0.233016	0.142762	3.06618	0.991029	8.16667	0.107136	0.79124
WTSI	Alox12e	homozygote	male	21	21	3.4	29.2333	27.3667	25.4742	4.22776	-1.86667	2.13186	104.32	88.97	424.23	646.419	0.151587	3.9619	2.15642	0.851552	11.3333	0.106163	0.784057
BCM	Ift172	heterozygote	male	22.75	21.2333	3.1	28.6571	28.6857	19.7256	4.91869	0.0285714	2.16734	104.152	97.2375	NaN	NaN	NaN	NaN	NaN	0.93403	10	0.146679	0.783586
MRC Harwell	Alpk3	heterozygote	male	20.1625	22.0125	NaN	28.2688	27.36	21.9399	5.05232	-0.44	2.27281	110.124	98.7486	2606.28	3712.58	NaN	NaN	NaN	0.896947	11	0.105959	0.782551
TCP	Ifi44	homozygote	male	27.025	21.4958	3.1	29.5412	28.635	22.4811	5.82651	-0.90625	1.87014	90.9414	80.086	761.869	2017.75	0.14497	NaN	1.88032	0.879759	10.625	0.105685	0.780522
UC Davis	Rab32	heterozygote	male	24.15	26.0667	3.1	27.7	27.96	21.886	4.99438	0.26	2.01483	96.4149	91.849	NaN	NaN	NaN	NaN	NaN	0.952691	10.5	0.145637	0.77802
MARC	Bod1	heterozygote	male	24	28.9958	NaN	26.16	27.13	21.1092	4.95434	0.97	1.97771	94.9633	89.0004	NaN	NaN	NaN	NaN	NaN	0.936493	11	0.145565	0.777634
BCM	Lypla1	homozygote	male	22.75	21.2333	3.1	22.4333	22.2167	16.4093	3.05113	-0.216667	1.96352	93.6966	90.4471	NaN	NaN	NaN	NaN	NaN	0.967382	11	0.144728	0.773166
WTSI	Denr	heterozygote	male	21	20.8571	3.4	28.1571	27.8714	22.1825	5.61788	-0.285714	2.10995	102.464	90.8504	419.861	661.582	0.183379	3.77415	2.60867	0.88664	11.5714	0.104447	0.771384
ICS	Satb1	heterozygote	male	21	20.75	3.145	25.5625	26.4375	16.9487	3.40886	0.875	2.08941	102.5	86.2818	927.557	1455.2	0.245298	0.154286	3.22779	0.841294	10	0.104095	0.768786
UC Davis	Ivl	homozygote	male	24.15	23.2333	3.1	29.65	30.24	24.3086	3.6543	0.59	1.97446	93.6209	93.0814	330.524	735.988	0.116071	0.084131	1.50549	0.993476	10	0.104036	0.76835
BCM	Adamts13	homozygote	male	22.75	21	3.1	26.75	26.2167	18.8092	3.97785	-0.533333	2.10235	100.638	95.716	NaN	NaN	NaN	NaN	NaN	0.951039	10.3333	0.143554	0.766893
WTSI	Gmnc	heterozygote	male	21	20.8571	3.4	28.8143	28.4714	22.9076	5.33513	-0.342857	2.12868	102.572	94.5131	584.698	851.301	0.197302	3.8966	2.80673	0.921658	11.4286	0.103357	0.763335
TCP	Kctd15	heterozygote	male	26.0688	21.9083	3.1	29.125	28.0225	21.1689	7.76599	-1.1025	1.9442	94.6037	83.0392	1153.86	2916.85	0.0866759	NaN	1.12422	0.878983	10.625	0.103317	0.763036
ICS	Slc7a11	homozygote	male	21	21	3.145	22.6125	23.2625	16.8219	1.58549	0.65	2.02089	96.8006	91.7841	702.506	1167.81	0.23119	0.184694	3.04216	0.948086	9.375	0.103315	0.763022
BCM	Trim59	heterozygote	male	22.75	21.2333	3.1	27.8	27.5	NaN	NaN	-0.3	2.13564	103.251	93.5963	NaN	NaN	NaN	NaN	NaN	0.906576	11	0.14278	0.76276
BCM	Tek	heterozygote	male	22.75	21.2333	3.1	25.075	25.2125	17.6769	3.87568	0.1375	2.04715	99.5664	87.6035	NaN	NaN	NaN	NaN	NaN	0.880713	11	0.142678	0.762212
TCP	Ampd1	heterozygote	male	26.1562	21.725	3.1	29.3075	29.5825	21.6423	7.09853	0.275	1.92789	93.1887	84.5573	1003.55	2532.04	0.146844	NaN	1.90463	0.907438	10	0.102607	0.757795
RBRC	Slc2a2	heterozygote	male	23	19.9048	3.339	28.6143	28.7857	20.3246	5.3237	0.171429	1.9974	96.4796	87.8522	300.306	300.81	0.162286	0.174694	2.26719	0.910475	11.5714	0.102495	0.756962
UC Davis	Il18r1	homozygote	male	24.15	23.2333	3.1	27.72	28.15	NaN	NaN	0.43	1.95008	93.9407	86.6732	552.5	1119.17	0.0983333	0.0574524	1.27542	0.922636	11	0.102469	0.756777
TCP	Cox19	heterozygote	male	26.3375	21.3125	3.1	27.9237	27.9675	22.6064	4.73121	0.04375	1.91446	92.4148	84.4117	1341.48	3154.37	0.174821	NaN	2.26749	0.916553	10	0.102031	0.753536
UC Davis	Adgrl3	homozygote	male	24.15	23.2333	3.1	28.64	28.9167	21.0893	6.51162	0.276667	1.95459	93.5098	89.1826	365.651	792.024	0.0915079	0.0495238	1.18689	0.949469	11	0.101542	0.749926
ICS	Diaph2	homozygote	male	21	21	3.145	24.4125	25.5375	18.5067	3.55727	1.125	2.05261	97.3864	96.5511	710.972	1138.32	0.266667	0.114762	3.50898	0.991446	10	0.101412	0.748969
BCM	Hoxb13	homozygote	male	22.75	21.2333	3.1	25.75	26.45	18.3262	3.84447	0.7	2.06636	98.4978	95.5616	NaN	NaN	NaN	NaN	NaN	0.97073	10.5	0.13999	0.747855
HMGU	Il13ra2	hemizygote	male	22.15	20.6667	3.339	27.28	27.12	17.8126	7.30084	-0.16	2.16711	104.348	96.4905	NaN	NaN	0.159048	NaN	2.22196	0.924174	10.6	0.139515	0.745313
BCM	Cyp7b1	homozygote	male	22.75	21.1944	3.1	25.1	24.9667	17.8552	3.1934	-0.133333	2.04409	98.5798	90.4579	NaN	NaN	NaN	NaN	NaN	0.916549	10.3333	0.138807	0.741536
WTSI	Tent5c	heterozygote	male	21	20.7143	3.4	32.3714	31.5714	23.0554	9.63442	-0.8	2.18795	106.437	93.5483	450.62	682.531	0.16839	3.7483	2.39545	0.878151	11.2857	0.100344	0.74108
UC Davis	Nsg1	homozygote	male	24.15	27.3619	3.1	27.5671	28.5457	NaN	NaN	0.978571	2.00356	95.437	92.8977	NaN	NaN	NaN	NaN	NaN	0.973181	11	0.138673	0.740816
MRC Harwell	Fstl1	homozygote	male	20.2125	21	NaN	26.2625	25.7912	19.6524	5.79049	-0.47125	2.24233	108.869	96.6333	2965.81	4163.52	NaN	NaN	NaN	0.888519	10.5	0.0998583	0.737493
MARC	Mast1	homozygote	male	24	33.6964	NaN	27.9	27.9	NaN	NaN	5.07536e-16	2.02632	98.312	87.571	NaN	NaN	NaN	NaN	NaN	0.892863	11	0.137732	0.735793
UC Davis	Hpcal4	homozygote	male	24.15	27.0381	3.1	30.8	30.42	23.4693	6.48384	-0.38	2.10712	101.064	95.2288	NaN	NaN	NaN	NaN	NaN	0.943144	10.7143	0.137382	0.733923
ICS	Bmx	hemizygote	male	21	21	3.145	23.5667	24.3833	NaN	NaN	0.816667	2.03403	97.2879	92.8864	698.576	1133.39	0.255556	0.181714	3.36277	0.954834	10	0.0993359	0.733635
BCM	1700012B09Rik	homozygote	male	22.75	21.2333	3.1	26.2	26.3167	18.0604	4.65188	0.116667	2.07816	99.5104	94.5047	NaN	NaN	NaN	NaN	NaN	0.950502	10.5	0.1372	0.73295
TCP	Ddost	heterozygote	male	27.4125	21.7708	3.1	27.5738	27.0725	20.3748	6.89904	-0.50125	1.84935	90.0648	78.7161	1293.92	3192.54	0.128377	NaN	1.6651	0.87234	10.625	0.099125	0.732077
BCM	Esyt2	heterozygote	male	22.75	21.2333	3.1	25.9	24.95	18.5323	3.59525	-0.95	2.06751	100.157	89.9002	NaN	NaN	NaN	NaN	NaN	0.897594	10.5	0.136278	0.728022
UC Davis	Elfn2	homozygote	male	24.15	26.6333	3.1	27.7829	28.5143	NaN	NaN	0.731429	2.00776	96.1705	91.1921	NaN	NaN	NaN	NaN	NaN	0.947618	11	0.135879	0.725893
MRC Harwell	Txnip	homozygote	male	19.8562	21	NaN	29.175	27.864	23.0793	5.67341	-1.756	2.29206	111.072	99.5293	2486.7	3534.39	NaN	NaN	NaN	0.895375	10.125	0.0982268	0.725444
TCP	Plekhm1	homozygote	male	27.0214	21.7905	3.1	24.6557	25.7957	20.0897	3.37066	1.14	1.79013	86.1865	79.7389	970.492	2593	0.159273	NaN	2.06583	0.926006	10.5714	0.0980944	0.724466
UC Davis	Lst1	heterozygote	male	24.15	27.2	3.1	28.26	29.6	22.9842	3.59636	1.34	2.0229	96.913	91.8171	NaN	NaN	NaN	NaN	NaN	0.947418	11	0.135538	0.724072
WTSI	Hecw2	heterozygote	male	21.5	21.6	3.4	29.875	30.1	25.471	4.44646	0.225	2.15614	103.808	96.0433	1254.51	1882.2	0.230476	0.194048	3.27866	0.924787	12	0.0979904	0.723698
TCP	Vps13d	heterozygote	male	26.3786	21.6857	3.1	29.2129	29.1729	21.5791	7.08773	-0.04	1.93981	94.0138	84.1926	1353.82	3345.47	0.158701	NaN	2.05842	0.897344	10.1429	0.0974867	0.719978
MRC Harwell	Adamtsl5	homozygote	male	20.2188	22	NaN	27.6875	26.3075	22.1296	4.71439	-1.38	2.25179	109.466	96.5492	2720.11	3761.21	NaN	NaN	NaN	0.882954	10	0.0972985	0.718588
UC Davis	Ccn5	homozygote	male	24.15	37.9667	3.1	26.895	27.25	21.0557	5.14475	0.355	1.93743	92.9052	87.6292	784.831	1361.69	0.122426	0.0523529	1.58792	0.943605	11	0.0966055	0.71347
MRC Harwell	Otud6b	heterozygote	male	20.1687	20.9	NaN	27.625	26.4387	21.0813	5.55293	-1.18625	2.26455	109.981	97.472	2931.07	4081.71	NaN	NaN	NaN	0.885719	11	0.0965539	0.713088
BCM	Alg10b	heterozygote	male	22.75	20.959	3.1	26.7769	26.2846	18.8504	3.99215	-0.492308	2.09122	101.483	90.2957	NaN	NaN	NaN	NaN	NaN	0.888368	10.3077	0.131544	0.702733
BCM	Cyp2ab1	homozygote	male	22.75	21.2333	3.1	24.8833	25.25	17.8004	3.1761	0.366667	2.02972	98.2677	88.4637	NaN	NaN	NaN	NaN	NaN	0.900454	10.1667	0.13146	0.702287
WTSI	Hibadh	homozygote	male	21	21.2857	3.4	29.0714	28.4286	23.0583	5.50975	-0.642857	2.12262	101.803	95.9431	519.47	781.674	0.209728	3.87075	2.98351	0.942467	11.1429	0.0949608	0.701323
MRC Harwell	Rtraf	heterozygote	male	20.3313	21.9	NaN	27.5	NaN	21.5092	5.96297	NaN	2.20891	106.481	97.9189	2079.5	2975.83	NaN	NaN	NaN	0.919091	11.5	0.0935618	0.690991
HMGU	Ttll12	homozygote	male	22.2	20.6667	3.339	26.8	25.65	15.5795	8.86938	-1.15	2.1363	104.376	89.7328	NaN	NaN	0.100794	NaN	1.40813	0.860462	10.8333	0.128575	0.686872
TCP	Phyh	homozygote	male	26.9429	21.2143	3.1	27.26	26.96	21.9726	4.47644	-0.3	1.83594	88.3902	81.7843	910.027	2499.71	0.142597	NaN	1.84955	0.926391	11	0.0929999	0.686841
ICS	Mapt	homozygote	male	21	21	3.145	26.2167	27.2667	19.7917	4.12041	1.05	2.08209	99.5568	95.1871	768.53	1224.01	0.281905	0.206905	3.70949	0.956279	11	0.0928503	0.685736
MRC Harwell	Slc15a3	homozygote	male	20.0938	20.7333	NaN	26.85	25.3475	NaN	NaN	-1.5025	2.24616	109.192	96.31	2857.25	3985.2	NaN	NaN	NaN	0.883495	10.5	0.0927787	0.685207
MARC	Rabggta	heterozygote	male	24	21.375	NaN	27.9857	27.7	21.2796	5.67537	-0.285714	2.01956	97.6413	88.5007	NaN	NaN	NaN	NaN	NaN	0.904702	10	0.128195	0.684841
UC Davis	Kcnh6	homozygote	male	24.15	26.0667	3.1	26.6671	26.8314	NaN	NaN	0.164286	1.96356	94.6415	87.0885	NaN	NaN	NaN	NaN	NaN	0.920068	11	0.127865	0.683079
TCP	Wee1	heterozygote	male	26.6375	21.175	3.1	27.55	27.1638	22.1041	3.88974	-0.38625	1.85024	88.9973	82.7122	839.272	2316.23	0.142542	NaN	1.84882	0.930928	10.875	0.0924603	0.682856
WTSI	Gtf2h2	heterozygote	male	21	20.5714	3.4	31.1429	30.4857	22.4652	8.48071	-0.657143	2.15256	104.569	92.5564	391.134	586.691	0.153175	3.90136	2.179	0.886179	12	0.0922707	0.681456
MRC Harwell	Btrc	heterozygote	male	19.6	21.3	NaN	25	25.83	18.1006	5.58695	0.83	2.24371	107.903	100.375	3060.79	4188.06	NaN	NaN	NaN	0.930236	11	0.092265	0.681414
HMGU	Palm3	homozygote	male	22.2	20.6667	3.339	25.77	24.89	15.2719	8.47331	-0.88	2.10163	102.168	90.1048	NaN	NaN	0.117619	NaN	1.64318	0.882403	10.5	0.127305	0.680089
WTSI	Cabp1	homozygote	male	21.5	20.75	3.4	28.8	28.5667	23.3066	6.18215	-0.233333	2.13238	105.065	86.4289	1293.05	1962.07	0.187143	0.161111	2.66222	0.823012	11.3333	0.0919625	0.679179
MRC Harwell	Igfbp3	homozygote	male	19.5286	21.4286	NaN	27.3714	26.8671	21.0376	4.88207	-0.504286	2.26726	110.053	97.8024	2437.99	3507.48	NaN	NaN	NaN	0.889076	11	0.0918981	0.678704
UC Davis	Mturn	homozygote	male	24.15	27.7667	3.1	30.3386	30.7914	24.7552	4.20932	0.452857	2.08171	99.6727	94.6937	NaN	NaN	NaN	NaN	NaN	0.949537	11	0.126937	0.678123
MRC Harwell	Atp2a1	heterozygote	male	20.4187	21.8167	NaN	28.775	26.6363	22.4165	5.17045	-2.13875	2.25337	109.643	96.2628	2610.72	3696.48	NaN	NaN	NaN	0.878346	10.25	0.0909174	0.671461
MRC Harwell	Ankib1	homozygote	male	20.1833	21.1667	NaN	26.5833	NaN	21.0472	5.07303	NaN	2.22559	107.072	99.4193	2626.08	3759	NaN	NaN	NaN	0.928207	10.6667	0.0906156	0.669232
TCP	Crybg1	heterozygote	male	26.3625	21.45	3.1	26.5725	26.8612	21.809	4.28351	0.28875	1.84035	88.3141	83.0099	840.45	2228.64	0.113615	NaN	1.47363	0.939906	10.25	0.0901805	0.666019
TCP	Sh3bp2	homozygote	male	26.375	21.2667	3.1	27.3	26.6475	21.8823	4.33176	-0.6525	1.88722	91.2644	82.6262	1191.16	3120.71	0.14401	NaN	1.86786	0.90549	11	0.0900864	0.665323
HMGU	Zmym6	homozygote	male	21.7	20.6667	3.339	27.7143	26.8429	17.3189	7.81542	-0.871429	2.20481	106.58	96.6803	NaN	NaN	0.140816	NaN	1.96726	0.908044	10.4286	0.124419	0.664673
MRC Harwell	Klf14	homozygote	male	20.3357	21.8881	NaN	27.4143	27.24	21.443	4.65328	-0.96	2.25207	108.999	98.275	3049.89	4267.28	NaN	NaN	NaN	0.901453	11	0.0899846	0.664572
UC Davis	Krt5	heterozygote	male	24.15	37.9667	3.1	27.935	27.79	21.3523	5.73481	-0.145	1.93529	93.3673	85.5208	458.89	948.125	0.0968382	0.0472059	1.25603	0.917203	10	0.0899723	0.664481
HMGU	Ica1l	homozygote	male	22	20.6667	3.339	27.6625	27.4625	17.4986	7.96657	-0.2	2.17715	104.81	97.0139	NaN	NaN	0.170833	NaN	2.38661	0.925304	10.5	0.124245	0.663741
WTSI	Natd1	homozygote	male	21	21	3.4	28.0375	27.1625	24.1325	3.72056	-0.875	2.0911	101.904	88.7723	402.785	613.051	0.178229	3.9119	2.53542	0.869942	11.5	0.0897378	0.662749
MRC Harwell	Mob2	heterozygote	male	20.1562	20.4	NaN	26.6375	25.9537	20.3178	4.89459	-0.68375	2.24816	108.688	98.538	3194.61	4322.78	NaN	NaN	NaN	0.908095	10.125	0.0894835	0.660871
BCM	Kctd7	homozygote	male	22.75	21.2333	3.1	25.9571	26.3714	17.3049	5.49355	0.414286	2.05653	98.9595	91.7921	NaN	NaN	NaN	NaN	NaN	0.928006	10.8571	0.123441	0.659448
TCP	Ubox5	homozygote	male	26.45	21.3125	3.1	27.8212	27.0738	22.1552	4.64822	-0.7475	1.85981	90.2211	80.4189	798.872	2258.17	0.134004	NaN	1.73809	0.89057	10.25	0.0890577	0.657726
TCP	Rsad1	heterozygote	male	27.2375	21.8167	3.1	26.7587	26.74	20.7161	5.28845	-0.01875	1.86627	90.7209	80.0344	1706.82	4081.43	0.126875	NaN	1.64562	0.882918	10.875	0.0890403	0.657598
MRC Harwell	Kcnj10	heterozygote	male	20.3643	21.85	NaN	29.6857	26.7643	24.5329	5.30529	-2.92143	2.28816	111.453	97.3306	2953.24	4127.98	NaN	NaN	NaN	0.874567	11	0.0890092	0.657368
HMGU	Sgip1	homozygote	male	24.1833	20.75	3.339	25.05	23.7833	NaN	NaN	-1.26667	1.90321	92.7897	80.6448	NaN	NaN	0.129365	NaN	1.80728	0.868071	10.3333	0.12283	0.656181
MRC Harwell	Ccnb1	heterozygote	male	20.525	18.9833	NaN	28.7667	27.7333	23.715	4.1554	-1.03333	2.24478	108.336	99.0637	2543.62	3677.24	NaN	NaN	NaN	0.913679	11	0.0888374	0.656099
UC Davis	Krt5	heterozygote	male	24.15	31.6222	3.1	28.5067	29.345	20.711	6.55697	0.838333	2.01798	97.2012	89.7284	NaN	NaN	NaN	NaN	NaN	0.923548	11	0.122624	0.655083
UC Davis	Tfec	homozygote	male	24.15	28.1714	3.1	28.5243	28.96	21.171	6.03706	0.435714	2.0185	97.5408	88.63	NaN	NaN	NaN	NaN	NaN	0.90974	10.7143	0.12257	0.65479
WTSI	Dusp5	homozygote	male	21.5	20.7778	3.4	29.1	28.5333	24.1756	5.92717	-0.566667	2.14823	103.982	93.7125	1523.78	2318.71	0.213333	0.173016	3.03479	0.900382	11.3333	0.0885993	0.654341
BCM	Cep19	homozygote	male	22.75	21.2333	3.1	29.6143	29.6286	18.8112	7.22749	0.0142857	2.17408	104.116	98.8215	NaN	NaN	NaN	NaN	NaN	0.949953	10.5714	0.122376	0.653755
MRC Harwell	Fcrl6	homozygote	male	20.3438	21.4625	NaN	27.99	25.7733	21.7126	5.90707	-2.09667	2.23072	108.157	96.6597	2378.77	3458.31	NaN	NaN	NaN	0.893988	10.375	0.0884103	0.652945
WTSI	L3mbtl2	heterozygote	male	21.5	20.7	3.4	30.5143	29.0857	24.9277	5.53352	-1.42857	2.16099	105.151	92.3065	1301.1	1951.83	0.15873	0.131293	2.25803	0.877409	11.5714	0.0878858	0.649071
UC Davis	Gdf2	homozygote	male	24.15	23.2333	3.1	28.805	29.63	20.7484	10.6743	0.825	1.94369	92.3474	90.9686	344	783.571	0.132976	0.055	1.72475	0.98516	10.5	0.0877736	0.648243
UC Davis	Panx1	homozygote	male	24.15	26.7042	3.1	31.0437	31.4563	22.5223	6.8796	0.4125	2.09886	100.867	94.1458	NaN	NaN	NaN	NaN	NaN	0.93404	11	0.121216	0.647559
BCM	Slc35d1	heterozygote	male	22.75	21.2333	3.1	21.94	22.02	15.597	3.2671	0.08	1.92388	91.4372	89.9309	NaN	NaN	NaN	NaN	NaN	0.984131	11	0.121086	0.646863
WTSI	Rnf157	homozygote	male	21	21	3.4	30.0286	29.5	24.2047	5.58145	-0.528571	2.12614	103.104	92.0658	388.662	580.844	0.185714	4.03129	2.6419	0.892409	11.5714	0.0875691	0.646732
TCP	Npc2	heterozygote	male	26.4688	21.4958	3.1	28.0362	28.265	22.0178	4.79213	0.22875	1.86535	90.0975	82.057	895.501	2361.48	0.157749	NaN	2.04607	0.90879	11	0.0875525	0.64661
BCM	Exoc6	heterozygote	male	22.75	21.2333	3.1	25.4143	25.6	18.7397	3.84016	0.185714	2.03631	97.3607	93.1214	NaN	NaN	NaN	NaN	NaN	0.957049	10.1429	0.120837	0.645535
HMGU	Psmc2	heterozygote	male	21.8	20.75	3.339	27.025	26.525	17.6366	7.64385	-0.5	2.17001	104.991	94.8244	NaN	NaN	0.147619	NaN	2.06229	0.903145	10	0.120581	0.644167
MRC Harwell	Elmod2	homozygote	male	20.275	21.3417	NaN	28.375	26.2767	21.6185	5.91342	-1.39	2.23409	107.85	98.4845	2203.12	3290.33	NaN	NaN	NaN	0.913401	10.5	0.0870421	0.64284
BCM	Marcks	homozygote	male	22.75	21.2333	3.1	24.7667	24.95	17.607	3.65976	0.183333	2.01473	96.5419	91.3747	NaN	NaN	NaN	NaN	NaN	0.948765	10.1667	0.120259	0.642444
TCP	Gart	heterozygote	male	26.65	21.3714	3.1	26.3657	26.5086	21.0596	4.04784	0.142857	1.84546	88.8213	82.3066	1128.45	2959.37	0.162044	NaN	2.10177	0.926705	10.5714	0.0869771	0.64236
UC Davis	Zhx3	homozygote	male	24.15	27.5542	3.1	31.1913	32.1587	23.1124	6.50126	0.9675	2.10226	100.339	96.7615	NaN	NaN	NaN	NaN	NaN	0.963113	10.875	0.119831	0.640159
TCP	Atp6v0a1	heterozygote	male	27.8875	21.3583	3.1	27.6863	26.77	22.627	4.16166	-0.91625	1.7936	86.9793	77.6637	998.379	2653.09	0.120905	NaN	1.56818	0.891159	10.5	0.0866533	0.639969
UC Davis	Pmch	homozygote	male	24.15	26.775	3.1	26.4163	26.445	21.3179	3.81423	0.02875	1.94698	93.8438	86.3484	NaN	NaN	NaN	NaN	NaN	0.920295	11	0.119424	0.637984
MRC Harwell	Areg	homozygote	male	20.9375	21.1896	NaN	26	25.1475	20.4638	4.22841	-0.8525	2.20912	106.9	96.473	3489.44	4795.87	NaN	NaN	NaN	0.902168	10.625	0.0862699	0.637137
TCP	Casq2	heterozygote	male	27.6	21.581	3.1	30.2829	30.3086	22.1284	7.84596	0.0257143	1.85807	89.8366	81.4143	1073.31	2670.55	0.126693	NaN	1.64325	0.904932	11	0.0851506	0.628871
MRC Harwell	Tardbp	heterozygote	male	20.3562	21.85	NaN	29.5625	27.95	23.5677	5.44688	-1.6125	2.27774	110.775	97.4946	2880.11	4012.35	NaN	NaN	NaN	0.880054	11	0.0848936	0.626973
BCM	Tmem86b	homozygote	male	22.75	21.2333	3.1	24.9667	24.9333	18.105	3.2208	-0.0333333	2.01741	96.3893	92.4964	NaN	NaN	NaN	NaN	NaN	0.959522	10.6667	0.116446	0.622077
RBRC	Atp6v0a4	heterozygote	male	23	19.9	3.339	27.8571	28.4	19.675	5.41169	0.542857	1.96311	94.5795	87.2115	263.361	263.932	0.162952	0.170272	2.27651	0.922467	11	0.0841971	0.621829
BCM	Npffr2	homozygote	male	22.75	21.2333	3.1	27.45	27.625	19.978	3.0248	0.175	2.09787	101.349	92.2118	NaN	NaN	NaN	NaN	NaN	0.90978	10.25	0.116368	0.621659
RBRC	Dnase1l2	homozygote	male	23	19.9667	3.339	21.8	22	15.3656	3.2652	0.2	1.84963	89.3739	81.2393	364.714	365.048	NaN	0.165238	NaN	0.908982	11	0.0837935	0.618848
HMGU	Mphosph9	homozygote	male	22.18	20.6667	3.339	28.06	26.63	17.2011	8.22196	-1.43	2.16611	105.154	93.4	NaN	NaN	0.129048	NaN	1.80284	0.88716	10.2	0.115791	0.618578
UC Davis	Vrk1	heterozygote	male	24.15	27.6048	3.1	27.5314	27.5114	NaN	NaN	-0.02	1.97923	95.3345	88.0057	NaN	NaN	NaN	NaN	NaN	0.922937	10.2857	0.115503	0.617038
BCM	Scarb1	homozygote	male	22.75	21.2333	3.1	25.3	26.0333	18.2732	2.96675	0.733333	2.02671	97.751	89.656	NaN	NaN	NaN	NaN	NaN	0.916893	10.6667	0.114944	0.614052
WTSI	Atp8b2	heterozygote	male	21.5	21.6667	3.4	28.4	27.6	23.9317	3.83519	-0.8	2.11556	102.078	93.4384	1320.2	1954.94	0.175714	0.147619	2.49964	0.91604	12	0.0831307	0.613953
UC Davis	Fam151a	heterozygote	male	24.15	36.8333	3.1	33.54	34.1	21.6842	11.2055	0.56	2.02337	98.6895	85.589	254.485	614.045	0.0975758	0.04	1.2656	0.867255	11	0.0824753	0.609113
ICS	Carmil2	homozygote	male	21	20.8182	3.145	23.8364	24.3909	17.8657	1.7724	0.554545	2.03608	97.6347	92.0936	987.463	1499.93	0.214286	0.138667	2.81972	0.944025	9.72727	0.0823799	0.608408
WTSI	Ppp1r42	homozygote	male	21.5	21	3.4	28.25	27.15	23.3711	5.16378	-1.1	2.12929	104.263	88.6197	1707.26	2421.57	0.171667	0.0952381	2.44206	0.847959	11.5	0.0821865	0.60698
BCM	Dact2	homozygote	male	22.75	21.2333	3.1	27.2571	27.4571	19.5186	3.39303	0.2	2.08877	100.832	92.0882	NaN	NaN	NaN	NaN	NaN	0.914378	10.4286	0.113518	0.606434
TCP	Gnpda1	heterozygote	male	26.5938	21.4958	3.1	28.0362	27.4713	22.3816	4.52771	-0.565	1.84876	89.7112	79.8492	836.363	2246.32	0.151561	NaN	1.96581	0.889048	10.25	0.0819181	0.604998
BCM	Gnai1	heterozygote	male	22.75	21.2333	3.1	25	25.2	17.8107	3.25408	0.2	2.01507	97.4998	88.0349	NaN	NaN	NaN	NaN	NaN	0.903221	11	0.11303	0.603829
TCP	Spop	heterozygote	male	26.69	21.8167	3.1	27.587	25.029	20.796	5.82639	-2.558	1.81851	89.3181	74.7119	628.315	1817.93	0.0848076	NaN	1.09999	0.837836	10.4	0.0815546	0.602313
HMGU	Il4i1	heterozygote	male	22.2556	20.6852	3.339	27.5889	26.4889	NaN	NaN	-1.1	2.14126	104.349	90.8986	NaN	NaN	0.111111	NaN	1.55226	0.86968	10.7778	0.112725	0.602197
BCM	Arhgap23	homozygote	male	22.75	21.2333	3.1	23.7857	24.0143	NaN	NaN	0.228571	1.97514	95.0106	88.2749	NaN	NaN	NaN	NaN	NaN	0.929182	10.2857	0.112479	0.600887
MRC Harwell	Plau	homozygote	male	20.35	21.8125	NaN	29.1375	28.0033	22.0473	6.17495	-1.48	2.26668	109.499	99.6534	2833.01	4022.19	NaN	NaN	NaN	0.909641	11	0.081336	0.600698
HMGU	Pebp4	homozygote	male	21.815	20.6667	3.339	25.02	24.43	NaN	NaN	-0.59	2.09535	101.102	92.5492	NaN	NaN	0.142857	NaN	1.99577	0.917476	10.8	0.112239	0.599604
HMGU	Acbd3	heterozygote	male	24.1056	20.75	3.339	24.9	24.2667	NaN	NaN	-0.633333	1.89426	91.9087	81.8505	NaN	NaN	0.128042	NaN	1.7888	0.890994	11	0.112058	0.598637
MRC Harwell	Arl6ip1	homozygote	male	20.2	21.9583	NaN	26.1875	24.7563	20.5503	4.40139	-1.43125	2.22261	107.857	95.9765	3070.86	4167.89	NaN	NaN	NaN	0.890298	10.75	0.0807564	0.596418
MRC Harwell	Chic2	heterozygote	male	20.425	21	NaN	27.6375	26.74	20.7651	5.6633	-0.8975	2.20015	106.59	95.6406	2183.18	3159.77	NaN	NaN	NaN	0.897868	10.625	0.0801883	0.592222
WTSI	Slc25a28	homozygote	male	21	20.8571	3.4	28.3	28.2429	23.0663	4.80514	-0.0571429	2.08612	100.083	94.185	403.904	605.955	0.206519	3.90952	2.93786	0.94081	12	0.0799597	0.590534
WTSI	Exosc9	heterozygote	male	21	21	3.4	31.0286	29.7571	23.4873	7.51869	-1.27143	2.13525	104.616	88.6491	338.266	526.623	0.156689	3.95986	2.229	0.847345	11	0.0794294	0.586618
BCM	Bicdl1	homozygote	male	22.75	21.2333	3.1	25.7714	26.3571	18.5326	2.92473	0.585714	2.03667	97.5204	92.6286	NaN	NaN	NaN	NaN	NaN	0.949982	10.5714	0.109606	0.585537
UC Davis	Entpd8	heterozygote	male	24.15	24.9333	3.1	23.23	24.04	18.5485	3.35313	0.81	1.83379	87.9396	82.9269	NaN	NaN	NaN	NaN	NaN	0.942998	10	0.10958	0.585395
MRC Harwell	Agl	homozygote	male	19.675	21.4	NaN	28.2	27.755	22.7744	3.76429	-0.445	2.26511	108.222	103.861	2510.16	3574.72	NaN	NaN	NaN	0.959702	10	0.0789813	0.583308
WTSI	Galnt18	homozygote	male	21	21	3.4	27.2286	26.6286	23.35	3.4201	-0.6	2.06201	99.2596	91.907	345.37	541.357	0.20068	4	2.8548	0.925849	11.2857	0.0789493	0.583072
HMGU	Napb	heterozygote	male	21.8	20.6667	3.339	24.475	23.7625	NaN	NaN	-0.7125	2.07564	100.387	90.8373	NaN	NaN	0.13869	NaN	1.93756	0.903643	10.75	0.108919	0.581869
UC Davis	Vti1a	homozygote	male	24.15	31.8625	3.1	27.3287	27.6625	NaN	NaN	0.33375	1.96599	94.9176	86.63	NaN	NaN	NaN	NaN	NaN	0.912448	11	0.108837	0.581428
WTSI	4930591A17Rik	homozygote	male	21.5	21.3333	3.4	30.2833	29.5667	26.0177	3.76952	-0.716667	2.13869	104.097	91.2409	1088.36	1721.19	0.183254	0.173016	2.6069	0.876459	11.3333	0.0787191	0.581371
MRC Harwell	Rel	homozygote	male	21.4438	21.25	NaN	27.7	26.845	21.3184	4.98861	-0.855	2.18529	105.727	95.5033	3002	4206.11	NaN	NaN	NaN	0.90366	10.875	0.0786279	0.580698
UC Davis	Ttc30a2	homozygote	male	24.15	27.2	3.1	29.3267	28.2733	NaN	NaN	-1.05333	2.0297	98.6446	87.1164	NaN	NaN	NaN	NaN	NaN	0.881486	11	0.107742	0.575579
MRC Harwell	Kcnn1	homozygote	male	20.1333	22.1	NaN	28.15	27.215	NaN	NaN	-0.935	2.24391	108.063	99.846	2602.18	3714.01	NaN	NaN	NaN	0.923822	10	0.0777532	0.574238
TCP	Ddx41	heterozygote	male	27	21.6333	3.1	28.6938	28.8113	22.0525	5.44962	0.1175	1.89152	90.7354	85.4394	1562.9	3726.71	0.174432	NaN	2.26245	0.940624	11	0.0777426	0.57416
ICS	Thra	heterozygote	male	21	21	3.145	21.8	23.1	14.7311	2.13309	1.3	2.05591	98.8636	92	NaN	NaN	0.229048	0.172857	3.01396	0.930575	11	0.107134	0.57233
ICS	Csf2rb	heterozygote	male	21	21	3.145	24.8	25.1286	18.7336	3.6207	0.328571	2.04424	98.4221	91.0519	892.669	1371.42	0.227687	0.110204	2.99606	0.924961	10	0.0767888	0.567116
RBRC	Psmf1	heterozygote	male	23	19.9762	3.339	26.0286	26.2571	18.7015	4.29999	0.228571	1.92092	92.5879	85.192	283.503	284.102	0.152063	0.168027	2.12438	0.920073	11.1429	0.0765355	0.565245
TCP	Dtnbp1	homozygote	male	26.65	21.6792	3.1	27.5613	26.98	22.1691	4.90193	-0.58125	1.82384	88.5943	78.4429	718.553	2058.03	0.115795	NaN	1.5019	0.884252	10.75	0.0762242	0.562946
MRC Harwell	Prkab2	heterozygote	male	20.2937	20.7667	NaN	28.8875	26.9138	21.7611	6.86069	-1.97375	2.21461	107.563	95.2986	2001.98	2833.32	NaN	NaN	NaN	0.885967	11	0.0758715	0.560341
RBRC	Sst	homozygote	male	23	20.119	3.339	26.7143	27.1143	18.3176	6.00077	0.4	1.93497	93.6212	84.5469	331.395	331.803	0.19	0.169683	2.65437	0.9033	11	0.0755609	0.558047
TCP	Zfp275	hemizygote	male	26.7125	21.3125	3.1	28.7888	28.0225	23.2551	4.34568	-0.76625	1.86807	90.2727	82.0215	1014.44	2711.03	NaN	NaN	NaN	0.907541	11	0.0754951	0.557561
TCP	Gps1	heterozygote	male	26.3	21.2667	3.1	29.6313	28.9587	24.3363	4.86345	-0.6725	1.91354	92.6807	83.2661	1115.3	2908.86	0.21776	NaN	2.82443	0.898692	10.875	0.0754275	0.557062
WTSI	Cyba	homozygote	male	21.5	21.1214	3.4	28.8143	28.2571	24.506	4.34416	-0.557143	2.11002	102.424	91.0094	1141.59	1802.04	0.182942	0.146939	2.60246	0.886769	12	0.0753594	0.556559
RBRC	Ube3c	homozygote	male	23	19.9048	3.339	25.0857	24.5	18.1186	4.42382	-0.585714	1.9093	92.9748	81.3022	495.197	495.741	0.150476	0.166667	2.10221	0.873174	11.1429	0.0751396	0.554936
UC Davis	Dpy19l1	homozygote	male	24.15	25.6889	3.1	21.49	21.31	NaN	NaN	-0.18	1.77052	84.7058	80.7772	NaN	NaN	NaN	NaN	NaN	0.954	10.6667	0.102746	0.548887
TCP	Fam210a	heterozygote	male	27.4312	21.4958	3.1	27.4138	26.93	21.9307	5.02901	-0.48375	1.80958	87.2472	80.1618	1187.55	2908.32	0.157273	NaN	2.03989	0.918305	10	0.0741365	0.547527
WTSI	Dip2a	homozygote	male	21	20.8571	3.4	27.5714	27.0857	22.7892	3.95628	-0.485714	2.07492	99.3401	94.41	580.075	844.685	0.187324	3.70408	2.6648	0.951032	12	0.0738233	0.545214
MRC Harwell	Pram1	homozygote	male	20.4563	20.6542	NaN	26.825	25.6775	20.97	5.68195	-1.1475	2.20669	106.336	97.9559	2837.82	3966.74	NaN	NaN	NaN	0.920862	10.25	0.0736679	0.544067
HMGU	Alkbh6	homozygote	male	21.5667	20.7222	3.339	25.8	25.1833	16.3005	6.98654	-0.616667	2.13136	102.88	93.996	NaN	NaN	0.146032	NaN	2.04012	0.914477	10.3333	0.101594	0.542736
UC Davis	Exosc3	homozygote	male	24.15	27.7667	3.1	28.87	29.4	20.4836	7.10746	0.53	2.00835	97.36	87.0799	NaN	NaN	NaN	NaN	NaN	0.894412	11	0.101203	0.540644
TCP	Rnf10	heterozygote	male	26.2714	21.5286	3.1	29.3657	28.9929	23.4751	5.25453	-0.372857	1.9691	95.5617	85.0078	1855.37	4540.69	0.148178	NaN	1.92193	0.890441	10.4286	0.0731599	0.540315
MRC Harwell	Elovl6	heterozygote	male	20.1938	21.9688	NaN	27.7	26.385	21.0204	5.58858	-1.315	2.211	106.828	97.1375	2252.9	3279.03	NaN	NaN	NaN	0.908509	10.25	0.0731063	0.539919
HMGU	Akr7a5	heterozygote	male	22.1	20.75	3.339	26.38	26.46	16.1452	7.77368	0.08	2.10354	101.202	93.9595	NaN	NaN	0.169524	NaN	2.36831	0.928658	11	0.10083	0.538656
BCM	Igfbp7	homozygote	male	22.75	21.1667	3.1	25.6143	26.2857	18.0958	3.58284	0.671429	2.02223	96.3275	93.76	NaN	NaN	NaN	NaN	NaN	0.971954	10.4286	0.100269	0.535655
WTSI	Ddhd1	homozygote	male	21.5	20.5111	3.4	28.3333	28.2167	24.0111	4.70652	-0.116667	2.10818	102.014	92.0699	1427.55	2085.71	0.208353	0.176984	2.96395	0.902418	11.1667	0.0721189	0.532627
RBRC	Prkab1	homozygote	male	23	19.9048	3.339	25.2714	25.8571	18.6188	4.01168	0.585714	1.90305	92.4151	81.9463	313.864	315.449	0.157415	0.16119	2.19915	0.88684	11.2857	0.0720967	0.532463
MRC Harwell	Krt74	homozygote	male	20.7286	20.8571	NaN	28.0429	24.5067	20.6202	5.86133	-1.19333	2.17879	105.03	96.5807	2082.45	3031.86	NaN	NaN	NaN	0.920233	10.8571	0.0718815	0.530873
HMGU	Prox2	homozygote	male	22.125	20.6667	3.339	25.63	24.86	15.9054	7.58423	-0.77	2.0756	100.216	91.4365	NaN	NaN	0.138095	NaN	1.92924	0.912271	10.6	0.0993646	0.530825
MRC Harwell	Ddx1	heterozygote	male	19.9875	22.1	NaN	28.8625	28.0912	22.1432	6.02775	-0.77125	2.22498	107.834	96.5728	1934.34	2807.87	NaN	NaN	NaN	0.895462	10	0.0714778	0.527892
MRC Harwell	Sirt3	heterozygote	male	20.25	20	NaN	24.5	24.19	20.1369	3.16397	-0.31	2.17336	105.246	94.6393	2898.64	4052.11	NaN	NaN	NaN	0.899221	10	0.0710745	0.524913
MRC Harwell	Grin3a	heterozygote	male	20.3938	22	NaN	27.825	27.135	NaN	NaN	-0.69	2.21014	106.86	96.8371	2409.36	3528.65	NaN	NaN	NaN	0.906078	10	0.0710112	0.524446
WTSI	Pramef20	homozygote	male	21	22	3.4	31.1429	30.2143	24.512	6.35438	-0.928571	2.13875	104.244	90.732	541.907	790.304	0.161565	3.97687	2.29835	0.868544	12	0.0707953	0.522851
UC Davis	Btnl1	homozygote	male	24.15	27.2708	3.1	26.6713	26.0888	20.1347	5.09502	-0.5825	1.93367	93.2197	85.6962	NaN	NaN	NaN	NaN	NaN	0.920056	10.25	0.0978451	0.522708
UC Davis	Slc45a3	homozygote	male	24.15	28.9	3.1	27.1614	28.3943	20.869	4.65439	1.23286	1.9493	93.2989	88.7902	NaN	NaN	NaN	NaN	NaN	0.953196	11	0.0975696	0.521236
ICS	Dnajc5b	homozygote	male	21	20	3.145	22.3	23.3	15.3168	2.15372	1	1.99301	97.0686	84.8053	911.636	1463.21	0.228857	0.177778	3.01146	0.873824	10.8	0.0703467	0.519538
MRC Harwell	Eif2b3	heterozygote	male	20.275	21.6979	NaN	27.325	26.595	21.8969	5.16232	-0.73	2.19944	106.282	96.5845	2298.41	3352.51	NaN	NaN	NaN	0.909344	10.375	0.070309	0.51926
TCP	Tep1	homozygote	male	26.7563	21.3125	3.1	26.525	26.0837	21.5195	4.47348	-0.44125	1.81078	87.4771	79.6017	942.937	2550.32	0.137063	NaN	1.77777	0.909395	10.25	0.0702463	0.518796
UC Davis	Pcdh18	homozygote	male	24.15	26.6333	3.1	26.425	26.42	21.0936	3.91665	-0.005	1.92489	92.4324	86.6039	NaN	NaN	NaN	NaN	NaN	0.938273	10.75	0.0970502	0.518461
MRC Harwell	Sell	homozygote	male	20.2437	21.3292	NaN	28.425	27.0825	23.0687	5.67377	-1.3425	2.27858	110.238	99.5892	3542.21	4854.3	NaN	NaN	NaN	0.903075	10.875	0.0700287	0.51719
WTSI	Ccdc159	homozygote	male	21.5	21	3.4	28.675	28.425	23.1603	5.53026	-0.25	2.09706	102.598	87.5842	1104.89	1671.82	0.194484	0.166667	2.76665	0.853321	11.75	0.0699825	0.516849
ICS	Tiam1	homozygote	male	21	21	3.145	23.2125	23.9	17.4417	2.7256	0.6875	1.99933	95.4375	91.983	751.318	1174.32	0.24756	0.143333	3.25756	0.964332	10	0.0699369	0.516512
UC Davis	Dzank1	homozygote	male	24.15	27.7667	3.1	29.06	29.4286	22.5767	4.92761	0.368571	2.00954	95.9989	92.1889	NaN	NaN	NaN	NaN	NaN	0.960646	11	0.0962389	0.514127
UC Davis	P2ry13	homozygote	male	24.15	23.2333	3.1	29.91	25.97	20.3305	8.80459	-3.94	1.94511	93.6027	86.8032	323.524	742.476	0.0919048	0.0447619	1.19204	0.927357	11	0.0694241	0.512725
MRC Harwell	Cry1	homozygote	male	20.2812	21.75	NaN	26.8875	NaN	19.9131	4.14972	NaN	2.21855	106.953	98.321	2923.03	4116.81	NaN	NaN	NaN	0.919266	10.875	0.0694117	0.512633
UC Davis	Eif4ebp3	homozygote	male	24.15	27.7667	3.1	27.36	27.455	20.4778	6.09678	0.095	1.95319	93.9771	87.2139	NaN	NaN	NaN	NaN	NaN	0.928221	10	0.095018	0.507605
WTSI	Pabpc4	homozygote	male	21.5	20.781	3.4	27.6143	27.0143	21.7995	5.95646	-0.6	2.09197	102.886	85.4609	1431.11	2130.69	0.183175	0.140816	2.60577	0.830805	11.5714	0.0680838	0.502826
MRC Harwell	Ccdc50	homozygote	male	20.1143	21.8524	NaN	27.5714	26.55	21.5736	5.32563	-1.02143	2.21858	107.401	96.7326	2519.2	3576.19	NaN	NaN	NaN	0.900882	10	0.0677664	0.500481
TCP	Plk1	heterozygote	male	26.2937	21.8167	3.1	26.9187	27.195	21.4288	4.35788	0.27625	1.86308	89.4265	83.9568	1243.77	3156.99	0.227727	NaN	2.95371	0.93925	11	0.0676296	0.499471
RBRC	Cck	homozygote	male	23	20.1143	3.339	26.0571	26.4714	NaN	NaN	0.414286	1.91448	92.4349	84.344	338.054	338.667	0.176122	0.168163	2.4605	0.912595	11	0.0674835	0.498392
BCM	Rundc3a	homozygote	male	22.75	21.06	3.1	23.16	23.8	17.0386	2.99614	0.64	1.93519	92.0317	90.2573	NaN	NaN	NaN	NaN	NaN	0.984175	10.6	0.0928293	0.495912
WTSI	Dhx35	heterozygote	male	21	20.7143	3.4	31.9857	31.6429	23.3654	8.29462	-0.342857	2.14054	103.408	94.0967	323.963	518.852	0.191814	3.90544	2.72867	0.909561	11.4286	0.0665401	0.491425
WTSI	Osbpl3	homozygote	male	21.5	21.0222	3.4	29.6167	29.25	24.5732	4.5697	-0.366667	2.11709	102.804	91.1795	1202.33	1815.3	0.181825	0.138889	2.58658	0.88628	11.6667	0.0664408	0.490691
WTSI	Ccdc69	homozygote	male	21	21	3.4	30.9143	30.5143	23.5418	6.87233	-0.4	2.12507	102.712	93.2328	441.357	663.396	0.191973	4.12245	2.73093	0.908333	11.2857	0.0663012	0.48966
BCM	Zfp831	homozygote	male	22.75	21.2333	3.1	23.68	23.58	16.6235	3.92824	-0.1	1.9507	93.6574	87.8167	NaN	NaN	NaN	NaN	NaN	0.939374	10.4	0.0914748	0.488676
MRC Harwell	Ncoa3	homozygote	male	20.3667	21.8778	NaN	24.25	23.6367	19.8948	3.62275	-0.613333	2.13733	102.845	95.4094	2408.64	3523.07	NaN	NaN	NaN	0.927663	10.3333	0.0659593	0.487135
UC Davis	Dbn1	heterozygote	male	24.15	26.6333	3.1	26.7225	27.4288	NaN	NaN	0.70625	1.9286	91.8394	89.5179	NaN	NaN	NaN	NaN	NaN	0.974626	10.375	0.0911073	0.486713
UC Davis	Hirip3	homozygote	male	24.15	22.7733	3.1	25.746	26.408	19.3773	5.68847	0.662	1.89647	90.4776	87.4274	NaN	NaN	NaN	NaN	NaN	0.964813	10.8	0.0906509	0.484274
MRC Harwell	Gnao1	heterozygote	male	20.6562	21.4542	NaN	27.4	26.0938	21.1506	4.91532	-1.30625	2.23306	109.35	92.9177	3572.06	4872.74	NaN	NaN	NaN	0.85005	10.25	0.0654204	0.483155
UC Davis	Rilp	homozygote	male	24.15	27.7667	3.1	28.0029	27.9386	20.8787	5.79843	-0.0642857	1.96921	94.6326	88.3424	NaN	NaN	NaN	NaN	NaN	0.934003	10	0.0901971	0.48185
TCP	Dpyd	homozygote	male	26.5857	21.581	3.1	27.48	25.9586	21.5863	5.37161	-1.52143	1.82372	89.0665	76.734	866.372	2298.06	0.121763	NaN	1.57931	0.858952	10.8571	0.0652308	0.481755
RBRC	Nxn	heterozygote	male	23	20.119	3.339	24.7429	25.3571	17.875	3.97972	0.614286	1.88758	91.3115	82.5352	362.721	363.633	0.172857	0.181349	2.41488	0.902427	11	0.0650084	0.480112
MRC Harwell	Ncbp3	heterozygote	male	20.2	20.7542	NaN	28.255	27.2087	20.9199	6.37734	-1.04625	2.23044	108.5	95.3795	2645.71	3748.18	NaN	NaN	NaN	0.879919	10.75	0.0644984	0.476346
BCM	Ndufs7	heterozygote	male	22.75	21.2333	3.1	25.8286	25.2429	18.1143	3.95239	-0.585714	2.01784	97.5317	88.52	NaN	NaN	NaN	NaN	NaN	0.908965	10.4286	0.0889269	0.475065
UC Davis	A830005F24Rik	heterozygote	male	24.15	27.7667	3.1	28.0367	28.6233	20.5426	6.29035	0.586667	1.96898	95.2114	86.2301	NaN	NaN	NaN	NaN	NaN	0.905451	11	0.08887	0.474761
TCP	Tmem100	heterozygote	male	26.475	21.7708	3.1	28.9525	29.0663	20.9542	7.38717	0.11375	1.87454	91.0713	80.5725	1127.78	2763.13	0.147844	NaN	1.91759	0.885256	10	0.0642686	0.474649
UC Davis	Cul5	heterozygote	male	24.15	28.4952	3.1	28.0657	27.89	22.3162	4.31854	-0.175714	1.96933	94.8159	87.7146	NaN	NaN	NaN	NaN	NaN	0.925789	11	0.0882757	0.471586
MRC Harwell	Gna11	homozygote	male	20.2056	21.3426	NaN	24.5889	22.3775	20.0402	4.38845	-2.3225	2.19045	105.627	96.9729	3388.52	4594.03	NaN	NaN	NaN	0.918016	10.4444	0.0636906	0.47038
MRC Harwell	Bbs5	homozygote	male	19.3929	21.4762	NaN	33.4429	31.1629	19.5011	13.2758	-2.28	2.33394	116.071	90.7685	1847.64	2736.5	NaN	NaN	NaN	0.783038	10.1429	0.0632762	0.46732
UC Davis	Ucn3	homozygote	male	24.15	25.5667	3.1	27.8075	28.2925	20.9311	5.71231	0.485	1.89571	91.3378	84.1988	328.629	689.667	0.0695	0.0509542	0.901443	0.921352	11	0.0625825	0.462196
UC Davis	Fbxo44	homozygote	male	24.15	26.2083	3.1	29.85	29.34	NaN	NaN	-0.51	2.02525	98.0529	88.2636	NaN	NaN	NaN	NaN	NaN	0.900564	10.75	0.0863197	0.461136
UC Davis	Tfap4	heterozygote	male	24.15	27.2	3.1	25.27	26.05	20.8894	3.4317	0.78	1.8764	90.1133	84.3895	NaN	NaN	NaN	NaN	NaN	0.936482	11	0.0860239	0.459556
TCP	Rhbdl1	heterozygote	male	26.4125	21.6333	3.1	26.3087	26.1088	20.6989	4.98241	-0.2	1.81302	87.472	80.1035	951.968	2452.44	0.127273	NaN	1.65078	0.914759	10.25	0.0621534	0.459027
BCM	9930012K11Rik	homozygote	male	22.75	21.2333	3.1	24.9333	25.0333	17.985	2.97448	0.1	1.98568	95.6282	88.3521	NaN	NaN	NaN	NaN	NaN	0.924544	10.1667	0.085798	0.45835
UC Davis	Wnt2b	homozygote	male	24.15	28.5762	3.1	27.6029	26.6857	20.4587	5.68854	-0.917143	1.95177	94.3413	85.6101	NaN	NaN	NaN	NaN	NaN	0.907232	10	0.0857242	0.457955
UC Davis	Cyren	homozygote	male	24.15	26.6333	3.1	28.1914	28.3129	21.6191	5.2759	0.121429	1.97082	94.7748	88.1827	NaN	NaN	NaN	NaN	NaN	0.929368	10.2857	0.0856873	0.457758
BCM	Btbd16	homozygote	male	22.75	21.2333	3.1	24.9	25.3571	18.4926	2.70415	0.457143	1.98448	95.5854	88.2458	NaN	NaN	NaN	NaN	NaN	0.922889	10	0.0856817	0.457728
UC Davis	Zc3hav1l	homozygote	male	24.15	27.0381	3.1	30.09	30.0457	22.1741	7.38165	-0.0442857	2.03229	97.768	90.8012	NaN	NaN	NaN	NaN	NaN	0.924	10.7143	0.0855811	0.457191
WTSI	Slc25a4	homozygote	male	21.5	21.081	3.4	27.6429	26.5714	22.4296	4.70764	-1.07143	2.0878	102.279	86.7233	1494.36	2181.36	0.172313	0.15034	2.45125	0.847169	11.8571	0.0614533	0.453857
WTSI	Lrmp	homozygote	male	21	21	3.4	28.3143	27.7857	22.3554	5.3678	-0.528571	2.06413	99.4362	91.7358	322.766	516.149	0.179932	4.03741	2.55964	0.922121	11.8571	0.0610697	0.451024
UC Davis	Dct	homozygote	male	24.15	26.7042	3.1	27.9537	28.3588	21.0703	5.54111	0.405	1.96148	93.8074	89.6122	NaN	NaN	NaN	NaN	NaN	0.955698	10.375	0.0840585	0.449057
TCP	Rock1	heterozygote	male	26.0429	21.4762	3.1	28.9214	27.6871	22.7807	5.87925	-1.23429	1.89473	92.4813	79.9118	1134.39	2802	0.148972	NaN	1.93222	0.865626	10.2857	0.0607306	0.448519
UC Davis	Nmur1	homozygote	male	24.15	27.7667	3.1	27.597	28.395	20.9219	5.51463	0.798	1.94973	93.3371	88.7478	NaN	NaN	NaN	NaN	NaN	0.950985	11.2	0.0838759	0.448081
MRC Harwell	Kcnj9	homozygote	male	19.3313	20.4167	NaN	26.85	26.21	21.0561	5.372	-0.64	2.23729	108.871	95.5369	2439.15	3534.54	NaN	NaN	NaN	0.877479	10.375	0.0605319	0.447052
WTSI	Tsfm	heterozygote	male	21.5	21.1143	3.4	29.0143	28.2286	22.8922	5.97218	-0.785714	2.10769	103.648	86.1405	1398.8	2045.15	0.161723	0.121088	2.30061	0.831272	12	0.0600107	0.443203
WTSI	Ddx55	heterozygote	male	21.5	20.6524	3.4	28.8	28.2	24.2615	4.70676	-0.6	2.0857	101.488	89.0882	988.255	1574.21	0.177256	0.144898	2.52158	0.878889	11.5714	0.0598924	0.442329
MRC Harwell	Pink1	homozygote	male	20.4875	21.3146	NaN	28.7	27.7625	21.5434	5.94398	-0.9375	2.1975	105.412	99.265	2170.95	3174.54	NaN	NaN	NaN	0.942639	10.625	0.059781	0.441506
UC Davis	Ccdc33	homozygote	male	24.15	28.9	3.1	28.2986	28.9743	22.0202	5.35494	0.675714	1.97113	94.286	89.9904	NaN	NaN	NaN	NaN	NaN	0.954419	10.4286	0.0825175	0.440824
BCM	Gstm4	homozygote	male	22.75	21.1333	3.1	23.4	23.5714	NaN	NaN	0.171429	1.93265	92.6278	87.5835	NaN	NaN	NaN	NaN	NaN	0.944702	10.1429	0.0825013	0.440738
HMGU	Golt1b	homozygote	male	21.96	20.6667	3.339	27.71	26.42	16.8226	9.08878	-1.29	2.13967	104.335	90.6048	NaN	NaN	0.118571	NaN	1.65649	0.868503	10.3	0.0817798	0.436883
TCP	Yars	heterozygote	male	26.6214	21.6857	3.1	27.2743	27.4557	20.9423	5.05014	0.181429	1.82978	88.4156	80.3635	1071.25	2776.78	0.137208	NaN	1.77964	0.909568	10.5714	0.0591278	0.436682
WTSI	Trappc10	homozygote	male	21	20.8571	3.4	32.6	31.6	23.7351	9.14372	-1	2.14422	104.654	90.4516	330.965	519.615	0.150975	3.71973	2.14771	0.866095	11.4286	0.058341	0.430871
MRC Harwell	Lta4h	homozygote	male	20.35	20.2667	NaN	25.85	25.2987	20.2248	3.97123	-0.55125	2.17642	104.698	97.2532	2754	3945.33	NaN	NaN	NaN	0.928835	10	0.0574003	0.423924
TCP	D630045J12Rik	homozygote	male	26.25	21.2667	3.1	27.3925	26.145	21.8298	4.62486	-1.2475	1.80202	87.7847	76.6137	504.458	1510.6	0.108607	NaN	1.40867	0.871267	10.375	0.0571129	0.421802
MRC Harwell	Ncf4	homozygote	male	20.4625	21.3	NaN	27.9625	27.0338	21.5244	5.53402	-0.92875	2.19145	105.793	96.599	2391.72	3431.41	NaN	NaN	NaN	0.914427	10.75	0.0569759	0.420789
WTSI	Reg3d	homozygote	male	21	20.875	3.4	30.6125	29.925	24.0104	6.17601	-0.6875	2.10558	102.161	90.9849	360.914	552.633	0.162664	3.88036	2.31399	0.891326	11.625	0.056804	0.41952
WTSI	Kcnh4	homozygote	male	21	20.3333	3.4	29.8	28.6833	22.3928	6.59699	-1.11667	2.09523	101.865	89.8045	452.354	699.983	0.160503	3.89683	2.28325	0.882166	11.5	0.0565885	0.417928
TCP	Tbx4	heterozygote	male	27.1875	21.45	3.1	27.1575	28.0837	21.1184	4.92073	0.92625	1.77836	85.1007	81.0641	927.878	2339.42	0.180516	NaN	2.34137	0.95329	11	0.0563845	0.416422
UC Davis	Gpx1	homozygote	male	24.15	26.8458	3.1	27.0475	27.6313	20.3136	5.78969	0.58375	1.92589	92.9934	84.8201	NaN	NaN	NaN	NaN	NaN	0.913051	10.875	0.077856	0.415922
WTSI	Pdcd2	heterozygote	male	21	21.4286	3.4	30.0571	29.0857	22.7875	6.87045	-0.971429	2.09771	102.274	88.8801	423.314	647.389	0.14449	3.88844	2.05545	0.868499	11.5714	0.0560819	0.414187
BCM	Dppa1	heterozygote	male	22.75	21.2333	3.1	27.0857	26.8714	19.5985	3.21929	-0.214286	2.04636	98.926	89.7152	NaN	NaN	NaN	NaN	NaN	0.906846	10	0.0766741	0.409608
HMGU	Il31	homozygote	male	21.75	20.6667	3.339	26.5714	25.6286	15.7751	8.88931	-0.942857	2.11522	102.932	90.3197	NaN	NaN	0.121769	NaN	1.70115	0.877229	10	0.0761934	0.40704
MRC Harwell	Rtn1	homozygote	male	19.225	21.3333	NaN	30	27.985	21.5469	6.70954	-2.015	2.34144	115.623	93.9846	3310.25	4685.77	NaN	NaN	NaN	0.812761	11	0.0549336	0.405707
HMGU	Tbl1xr1	homozygote	male	21.6	20.6667	3.339	22.95	22.35	NaN	NaN	-0.6	2.01028	97.4127	87.3095	NaN	NaN	0.157143	NaN	2.19534	0.894834	11	0.0758123	0.405004
MRC Harwell	Sptbn2	homozygote	male	20.0714	21.5548	NaN	27.3	25.7914	21.4647	5.11895	-1.50857	2.20465	106.804	95.8494	2496.65	3628.78	NaN	NaN	NaN	0.89746	10.2857	0.054827	0.404919
MRC Harwell	Ppp3cc	homozygote	male	20.2188	22.075	NaN	29.2	28.4262	22.8608	5.38693	-0.77375	2.22059	107.551	96.6298	2241.03	3286.02	NaN	NaN	NaN	0.898659	10.75	0.0548059	0.404763
UC Davis	Ccdc92	homozygote	male	24.15	23.2333	3.1	25.675	25.55	20.1294	4.44256	-0.125	1.84249	88.6603	82.2388	253.488	587.274	0.113333	0.0404762	1.46998	0.927781	11	0.0543663	0.401516
UC Davis	Parp12	homozygote	male	24.15	27.3889	3.1	26.81	26.9133	20.0547	5.28894	0.103333	1.91529	92.3828	84.7056	NaN	NaN	NaN	NaN	NaN	0.916801	10	0.0749605	0.400454
UC Davis	Pygo2	heterozygote	male	24.15	26.0667	3.1	27.9443	27.4843	21.8281	5.25516	-0.46	1.95198	93.6462	88.1334	NaN	NaN	NaN	NaN	NaN	0.939864	10.7143	0.0748648	0.399942
WTSI	Csmd1	homozygote	male	21	21	3.4	30.1571	30.1857	21.6041	8.34165	0.0285714	2.09201	100.421	94.251	320.545	502.636	0.195261	3.68776	2.7777	0.938565	11.4286	0.0539006	0.398077
MRC Harwell	Hhipl1	homozygote	male	20.6562	20.8208	NaN	27.0875	NaN	21.0011	4.32864	NaN	2.1426	103.307	94.9001	1995.63	2939.14	NaN	NaN	NaN	0.918422	10	0.05379	0.39726
KMPC	Prkab1	homozygote	male	22	20	NaN	25.4413	26.09	20.1609	4.75618	0.64875	2.08736	100.075	94.4821	1326.01	4208.69	0.202798	0.13869	NaN	0.944285	10.625	0.0536199	0.396004
WTSI	Zfyve28	homozygote	male	21	21.1429	3.4	27.8571	27.4429	23.67	3.72957	-0.414286	2.05213	98.7793	91.4839	430.331	630.418	0.173796	3.81565	2.47235	0.927502	12	0.0535896	0.39578
TCP	Skida1	heterozygote	male	26.9875	21.45	3.1	28.235	27.8575	21.1088	6.16077	-0.3775	1.83183	88.9152	79.0264	1287.75	3003.55	0.133784	NaN	1.73523	0.888938	10	0.0534726	0.394916
BCM	Gdpd5	heterozygote	male	22.75	21.2333	3.1	24.525	24.8	17.0467	3.24779	0.275	1.96022	94.7205	86.0853	NaN	NaN	NaN	NaN	NaN	0.908808	10	0.0735858	0.393109
MRC Harwell	Depdc5	heterozygote	male	20.5938	22.125	NaN	29.6	28.0063	21.7032	8.06079	-1.59375	2.20573	107.504	93.5892	2211.68	3255.26	NaN	NaN	NaN	0.87057	10.375	0.0532278	0.393109
UC Davis	Cdkn1a	homozygote	male	24.15	23.2333	3.1	25.9	26.5033	19.8098	5.03347	0.603333	1.88405	90.7646	83.7201	NaN	NaN	NaN	NaN	NaN	0.920708	10	0.0732332	0.391226
TCP	Atp6v0d1	heterozygote	male	26.5312	21.6792	3.1	26.8863	26.5725	21.8765	4.00704	-0.31375	1.79666	86.6694	79.429	841.732	2132.81	NaN	NaN	NaN	0.914877	11	0.0529728	0.391225
TCP	Ywhaz	heterozygote	male	26.075	21.5417	3.1	27.74	27.5837	22.3426	5.01774	-0.15625	1.85998	89.5065	83.002	1079.6	2736.23	0.180952	NaN	2.34702	0.928497	11	0.0529526	0.391076
HMGU	Tbl1xr1	heterozygote	male	21.6	20.6667	3.339	26.61	25.43	NaN	NaN	-1.18	2.12611	104.027	88.773	NaN	NaN	0.107619	NaN	1.50348	0.853386	11	0.0729388	0.389653
WTSI	Atp5e	heterozygote	male	21	21.1429	3.4	29.8857	29.4286	23.9222	5.33141	-0.457143	2.08968	101.003	91.6772	399.488	618.679	0.190726	3.79932	2.71319	0.90719	11.2857	0.0524437	0.387318
MRC Harwell	Rab23	heterozygote	male	20.2875	21.2167	NaN	30.2875	28.465	22.9443	5.80781	-1.8225	2.21793	107.915	94.7592	1905.91	2818.42	NaN	NaN	NaN	0.878106	10.625	0.0524117	0.387081
MRC Harwell	Ntrk1	heterozygote	male	20.9625	21.4	NaN	27.425	26.8575	20.9953	4.59719	-0.5675	2.17394	105.206	94.906	2905.64	4068.7	NaN	NaN	NaN	0.901528	10.875	0.0522927	0.386202
HMGU	Pacs1	heterozygote	male	21.6	20.6667	3.339	26.4889	25.9556	16.5553	8.50661	-0.533333	2.12152	102.887	91.8413	NaN	NaN	0.158201	NaN	2.21013	0.893481	10.8889	0.07227	0.38608
UC Davis	Thpo	homozygote	male	24.15	26.4917	3.1	27.4088	27.7087	20.8989	5.52626	0.3	1.93187	92.23	88.834	NaN	NaN	NaN	NaN	NaN	0.962962	10.75	0.0721256	0.385309
WTSI	Mlec	homozygote	male	21.5	20.6667	3.4	27.06	26.32	22.6717	4.22255	-0.74	2.06155	100.44	87.6012	1387.37	2030.61	0.165833	0.145238	2.35908	0.872426	11.7	0.0521296	0.384998
TCP	Ahcy	heterozygote	male	26.8188	21.5417	3.1	28.6687	28.22	22.9841	5.69737	-0.44875	1.84758	89.0817	81.836	1126.19	2998.03	0.166609	NaN	2.16098	0.918585	10	0.052129	0.384993
UC Davis	Reg2	homozygote	male	24.15	27.4429	3.1	28.31	28.5714	21.1124	5.82114	0.261429	1.961	94.3857	87.446	NaN	NaN	NaN	NaN	NaN	0.925835	10.8571	0.0720158	0.384722
UC Davis	Ap4e1	homozygote	male	24.15	27.6048	3.1	26.76	27.0414	20.9649	4.75539	0.281429	1.91042	91.5745	86.5327	NaN	NaN	NaN	NaN	NaN	0.944628	10.5714	0.0717089	0.383083
UC Davis	Ffar1	homozygote	male	24.15	23.2333	3.1	28.56	28.74	NaN	NaN	0.18	1.9061	91.8326	84.6797	416.262	867.262	0.0933333	0.0461905	1.21057	0.922109	11	0.0517609	0.382274
HMGU	Ywhab	homozygote	male	21.48	20.6667	3.339	26.32	25.78	NaN	NaN	-0.54	2.12543	103.038	92.1492	NaN	NaN	0.138095	NaN	1.92924	0.895847	10.4	0.0713406	0.381115
TCP	Pex26	heterozygote	male	27.0938	21.3125	3.1	29.3188	29.5463	21.4631	7.10681	0.2275	1.86371	90.065	81.8173	1417.73	3495.17	0.126926	NaN	1.64629	0.90752	11	0.0515477	0.3807
BCM	Nme7	heterozygote	male	22.75	21.2333	3.1	27.8	27.85	19.8645	3.9108	0.05	2.06355	98.3979	95.3111	NaN	NaN	NaN	NaN	NaN	0.968651	11	0.0706923	0.377652
HMGU	Acmsd	homozygote	male	22.0375	20.75	3.339	25.4625	24.8375	19.5185	3.41535	-0.625	2.04901	99.2068	89.2872	NaN	NaN	0.142857	NaN	1.99577	0.900238	10.625	0.0706873	0.377625
MRC Harwell	Arhgef11	homozygote	male	20.1438	20.65	NaN	26.0875	25.1388	19.7927	5.97235	-0.94875	2.19797	105.435	99.2833	3115.41	4277.13	NaN	NaN	NaN	0.940839	11	0.0509634	0.376385
MRC Harwell	Chmp4c	homozygote	male	20.15	21.0625	NaN	27	24.9525	20.0122	6.62418	-2.0475	2.20602	106.995	95.467	2902.6	4035.46	NaN	NaN	NaN	0.892485	10.375	0.0508343	0.375431
WTSI	Trmt2a	homozygote	male	21	21.1667	3.4	27.25	25.9	20.4014	6.35661	-1.35	2.05054	100.586	84.7032	707.073	993.274	0.116005	3.82222	1.65024	0.8431	11.6667	0.0500492	0.369633
WTSI	Map3k1	heterozygote	male	21.5	20.9143	3.4	30.4429	29.8286	24.4546	6.59199	-0.614286	2.12221	103.88	88.4519	1308.75	1964.31	0.18665	0.15034	2.6552	0.85084	12	0.050013	0.369366
UC Davis	Tex37	homozygote	male	24.15	27.7667	3.1	26.4857	26.9729	19.3966	5.85932	0.487143	1.89817	91.5079	84.1232	NaN	NaN	NaN	NaN	NaN	0.920303	11	0.0683577	0.36518
TCP	Rnf10	homozygote	male	27.3	21.6333	3.1	24.34	24.36	18.943	4.73576	0.02	1.77737	85.5587	79.2185	1858.25	4102.92	0.170909	NaN	2.21676	0.925897	11	0.0493129	0.364195
UC Davis	Fam151a	homozygote	male	24.15	27.4833	3.1	28.26	28.22	21.6493	5.6395	-0.04	1.95543	94.8496	84.5902	NaN	NaN	NaN	NaN	NaN	0.891439	10.6667	0.0680719	0.363653
HMGU	Dnmt3l	homozygote	male	22.325	20.6667	3.339	28.27	27.05	17.039	9.17697	-1.22	2.11237	102.702	90.5254	NaN	NaN	0.129048	NaN	1.80284	0.880662	10.1	0.0677117	0.361729
HMGU	Ddx43	homozygote	male	21.9	20.6667	3.339	25.2	25.16	15.5965	7.37258	-0.04	2.04926	98.6032	91.4921	NaN	NaN	0.170952	NaN	2.38827	0.928049	10.8	0.0676236	0.361258
TCP	Dhfr	heterozygote	male	27.0125	21.6792	3.1	24.5087	24.6112	19.0846	4.6757	0.1025	1.73361	83.8369	75.8962	959.181	2466.69	0.112602	NaN	1.46049	0.907226	11	0.0486879	0.359579
MRC Harwell	Ryr1	heterozygote	male	20.2875	22	NaN	26.7875	NaN	20.075	5.20013	NaN	2.17051	104.86	95.3993	2390.04	3458.59	NaN	NaN	NaN	0.9095	11.25	0.0484231	0.357624
UC Davis	Ccn5	homozygote	male	24.15	28.3619	3.1	28.1014	27.9457	20.917	6.13513	-0.155714	1.94911	93.9266	86.5122	NaN	NaN	NaN	NaN	NaN	0.921085	10.1429	0.0668902	0.357341
UC Davis	Adamts18	homozygote	male	24.15	27.8375	3.1	27.5825	27.95	21.0057	4.78346	0.3675	1.93219	93.062	85.9373	NaN	NaN	NaN	NaN	NaN	0.922662	9.75	0.0668048	0.356884
KMPC	Ap4e1	homozygote	male	22	20	NaN	26.2312	26.6625	NaN	NaN	0.43125	2.1409	102.558	97.2034	2030.63	5370.36	0.191845	0.168571	NaN	0.947653	10.5	0.0481725	0.355773
MRC Harwell	Sdc4	heterozygote	male	20.1062	21.5333	NaN	27.1125	26.7263	21.465	4.84942	-0.38625	2.18061	104.903	97.4302	2243.47	3314.87	NaN	NaN	NaN	0.928353	11	0.0480719	0.35503
TCP	Abcb9	homozygote	male	26.4286	21.3714	3.1	26.7986	25.8914	21.0543	4.73471	-0.907143	1.79892	86.9771	78.8212	825.451	2224.21	0.158568	NaN	2.05669	0.906562	11	0.0480507	0.354873
TCP	Fbxo9	homozygote	male	26.4312	21.45	3.1	27.4088	26.8863	21.4696	5.6458	-0.5225	1.82572	88.472	79.2857	975.672	2655.74	0.156728	NaN	2.03282	0.895671	10.875	0.0469696	0.346889
UC Davis	Tox	homozygote	male	24.15	23.2333	3.1	26.24	26.72	20.2288	5.47489	0.48	1.85386	87.8512	87.5777	333.238	797.071	0.147143	0.0538095	1.9085	0.996887	10	0.0469286	0.346586
WTSI	Rwdd1	homozygote	male	21	21.4444	3.4	26.8444	25.6556	21.1089	5.26247	-1.18889	2.02737	98.6092	86.739	454.607	669.283	0.160388	3.80212	2.28162	0.880308	11.2222	0.0469056	0.346417
RBRC	Penk	homozygote	male	23	19.9048	3.339	25.5571	25.6286	18.6396	4.15117	0.0714286	1.88463	91.2137	82.2463	375.932	376.782	0.151032	0.154381	2.10997	0.901172	11	0.0458525	0.338639
ICS	Lat	homozygote	male	21	21	3.145	24.2375	24.9875	18.2496	4.14439	0.75	2.00659	95.0429	94.9563	964.545	1481.61	0.235714	0.112321	3.10169	1.00004	10.5	0.0458412	0.338555
HMGU	Zfp445	heterozygote	male	23.6	20.75	3.339	27.03	25.68	NaN	NaN	-1.35	1.95809	95.6512	82.3095	NaN	NaN	0.10619	NaN	1.48352	0.858816	10.6	0.0633229	0.338283
BCM	Rps19bp1	heterozygote	male	22.75	21.2333	3.1	25.6	25.5714	18.0757	3.525	-0.0285714	1.98456	95.6321	88.0969	NaN	NaN	NaN	NaN	NaN	0.92164	10	0.0630599	0.336878
TCP	Col26a1	homozygote	male	26.1571	22.1571	3.1	27.2571	26.2771	22.718	3.91075	-0.98	1.80773	87.1103	80.2504	633.848	1908.1	NaN	NaN	NaN	0.91983	10.1429	0.0455524	0.336423
WTSI	Kng2	homozygote	male	21.5	20.7583	3.4	30.1667	29.8	24.3033	5.43569	-0.366667	2.11687	103.404	88.994	1390.74	2083.6	0.177429	0.162698	2.52403	0.860388	11.3333	0.0455082	0.336096
WTSI	Vxn	homozygote	male	21	20.75	3.4	31.6	30.8875	23.7486	7.50553	-0.7125	2.12028	103.486	89.4396	514.397	739.325	0.173764	3.83452	2.4719	0.863976	11.625	0.045417	0.335422
HMGU	Ppp4r3b	homozygote	male	21.6667	20.713	3.339	26.8778	26.6444	16.0151	8.42225	-0.233333	2.11846	102.506	92.5388	NaN	NaN	0.148677	NaN	2.07708	0.903791	10.7778	0.0623299	0.332978
ICS	Ap4e1	homozygote	male	21	21	3.145	25.08	25.56	18.1717	1.69718	0.48	2.05867	100.1	88.1909	1707.26	2461.93	0.199524	0.153333	2.62547	0.880669	11.4	0.044753	0.330519
WTSI	Cd300lg	homozygote	male	21.5	20.8548	3.4	29.3286	29.1857	24.5801	4.50779	-0.142857	2.09348	101.243	91.6388	1278.35	1922.57	0.216054	0.176871	3.0735	0.905348	11.8571	0.0443493	0.327537
UC Davis	Fnbp1l	homozygote	male	24.15	27.5333	3.1	24.7433	25.29	19.016	4.77717	0.546667	1.83422	87.6671	83.9905	NaN	NaN	NaN	NaN	NaN	0.958531	10.4444	0.060924	0.325468
UC Davis	Gm6890	hemizygote	male	24.15	25.8778	3.1	27.625	27.8133	20.1856	6.75929	0.188333	1.92762	92.8729	85.6242	NaN	NaN	NaN	NaN	NaN	0.921468	10.3333	0.060858	0.325115
BCM	Cilp	homozygote	male	22.75	21.2333	3.1	26.7667	26.6833	19.3775	3.27591	-0.0833333	2.01991	97.516	89.0225	NaN	NaN	NaN	NaN	NaN	0.913158	10	0.0605671	0.323561
ICS	Obp2a	homozygote	male	21	20	3.145	27.75	28.9	17.6586	4.55249	1.15	2.08001	98.9341	96.9568	1112.18	1688.75	0.267381	0.183333	3.51838	0.977988	11	0.043686	0.322639
WTSI	Arhgap22	homozygote	male	21.5	20.8333	3.4	28.7	28.1857	23.2549	5.62527	-0.514286	2.08043	101.452	88.0748	1290.5	1921.7	0.176395	0.158503	2.50932	0.867774	11	0.0434651	0.321007
MRC Harwell	Nedd4l	heterozygote	male	20.2312	21	NaN	26.375	25.1475	19.8448	4.23648	-1.2275	2.16632	104.674	95.1588	2512.84	3613.91	NaN	NaN	NaN	0.90834	10.625	0.043369	0.320297
TCP	Cldn1	heterozygote	male	26	21.3583	3.1	27.7587	27.1462	22.3115	4.8206	-0.6125	1.88885	91.1121	83.5191	1435.2	3650.67	0.18665	NaN	2.42093	0.915935	10.625	0.0430582	0.318002
WTSI	Pigl	heterozygote	male	21	21	3.4	28.9429	28.6286	21.2223	7.2738	-0.314286	2.05765	99.7306	89.2867	305.76	501.208	0.172313	3.8381	2.45125	0.895446	11.5714	0.0430248	0.317755
KMPC	Npas3	heterozygote	male	22	20	NaN	30.2929	29.3543	21.0058	8.49246	-0.938571	2.23215	106.866	101.57	2275.68	5854.95	0.167483	0.119592	NaN	0.95014	11.5714	0.0428107	0.316174
BCM	Cfap97d1	homozygote	male	22.75	22	3.1	28.34	27.96	20.3759	3.94151	-0.38	2.06948	99.1669	93.8534	NaN	NaN	NaN	NaN	NaN	0.946846	10.6	0.0591129	0.315792
RBRC	Ube2g1	homozygote	male	23	20.0611	3.339	23.9833	23.9333	NaN	NaN	-0.05	1.84665	89.3586	80.6486	256.754	257.23	0.149524	0.159333	2.0889	0.902719	10.8333	0.0427383	0.315639
UC Davis	Prg3	heterozygote	male	24.15	28.3333	3.1	27.87	28.06	NaN	NaN	0.19	1.93361	92.6145	87.8396	NaN	NaN	NaN	NaN	NaN	0.948443	11	0.0589034	0.314673
TCP	Arhgef5	homozygote	male	26.3214	21.6333	3.1	28.4029	28.2657	22.3199	5.32788	-0.137143	1.87189	90.1197	83.3913	1386.71	3341.11	0.152284	NaN	1.97518	0.92579	10.5714	0.0423393	0.312693
WTSI	Chmp6	heterozygote	male	21	20.7143	3.4	27.9857	27.4286	22.5341	5.13856	-0.557143	2.03726	98.3617	89.7588	287.75	468.998	0.187687	3.87211	2.66996	0.913129	11.5714	0.0423185	0.312539
UC Davis	Gkn2	homozygote	male	24.15	26.4714	3.1	29.26	30.0371	23.1991	4.9466	0.777143	1.97792	94.1586	91.9118	NaN	NaN	NaN	NaN	NaN	0.97595	10.5714	0.0581242	0.310511
BCM	Podn	homozygote	male	22.75	21.2333	3.1	25.6143	25.6143	18.362	3.49311	-1.01506e-15	1.97984	95.4748	87.6374	NaN	NaN	NaN	NaN	NaN	0.917884	10.2857	0.0578756	0.309182
HMGU	Tspo	homozygote	male	23.8167	20.75	3.339	24.45	23.8667	15.1414	6.08105	-0.583333	1.85008	89.5774	80.6111	NaN	NaN	0.129365	NaN	1.80728	0.897812	10	0.0576283	0.307861
WTSI	Klrb1a	homozygote	male	21	20.4286	3.4	29.2	28.6429	23.1418	5.40196	-0.557143	2.06374	99.1445	92.691	375.045	570.851	0.191111	3.73741	2.71867	0.93381	11.2857	0.0415287	0.306706
MRC Harwell	Sorl1	homozygote	male	20.4583	21.4833	NaN	25.7783	23.856	20.5419	4.8404	-1.558	2.11104	102.101	92.378	1929.54	2827.34	NaN	NaN	NaN	0.904966	10.3333	0.0412267	0.304476
UC Davis	Asic4	homozygote	male	24.15	23.2333	3.1	28.32	28.7033	NaN	NaN	0.383333	1.89207	90.8981	84.978	481.611	904.635	0.0953968	0.0594286	1.23733	0.93474	10.6667	0.0409546	0.302466
TCP	Lhfpl1	hemizygote	male	26.5063	21.8167	3.1	27.5188	26.6337	22.0769	4.87134	-0.885	1.80046	87.0816	78.7802	817.868	2205.79	NaN	NaN	NaN	0.90515	10.5	0.0404916	0.299047
TCP	C8a	homozygote	male	27.0214	21.5286	3.1	28.8714	27.87	22.9757	5.08644	-1.00143	1.83312	88.468	80.8992	1232.23	3113.93	0.120909	NaN	1.56824	0.914406	10.7143	0.0401247	0.296337
UC Davis	Socs1	heterozygote	male	24.15	27.2	3.1	26.76	26.865	20.1188	5.4923	0.105	1.89373	91.0765	84.7016	NaN	NaN	NaN	NaN	NaN	0.930161	10.5	0.0550241	0.293949
UC Davis	Wnt5b	homozygote	male	24.15	31.1667	3.1	26.3914	26.4329	NaN	NaN	0.0414286	1.88168	90.7949	83.1018	NaN	NaN	NaN	NaN	NaN	0.915586	11	0.0549318	0.293456
HMGU	Slc25a10	homozygote	male	21.95	20.6667	3.339	23.9	23.14	17.1518	6.28453	-0.76	1.99001	96.9048	84.7397	NaN	NaN	0.122857	NaN	1.71636	0.875298	10	0.0548368	0.292949
WTSI	Eef1akmt1	homozygote	male	21.5	21.1	3.4	27.34	26.62	22.4608	5.04484	-0.72	2.04843	99.5428	87.9632	1210.02	1875.51	0.184381	0.152381	2.62293	0.88379	11.6	0.0394423	0.291297
WTSI	Hmgxb3	heterozygote	male	21	20.5714	3.4	29.2286	28.5429	22.4895	6.09199	-0.685714	2.06231	99.9243	89.6047	373.738	574.457	0.159637	3.72653	2.27093	0.897393	11.4286	0.0394187	0.291123
TCP	Cbx4	heterozygote	male	26.0357	21.0571	3.1	26.2243	26.5357	18.9931	6.61333	0.311429	1.86157	89.7853	82.3518	1698.26	3864.69	0.157483	NaN	2.04262	0.917624	11	0.0392182	0.289642
UC Davis	Gpr17	homozygote	male	24.15	26.0667	3.1	25.7429	26.0586	NaN	NaN	0.315714	1.8599	88.8009	85.5002	NaN	NaN	NaN	NaN	NaN	0.963887	11	0.0541878	0.289482
TCP	Pgbd1	homozygote	male	26.0562	21.45	3.1	27.7937	27.1225	22.7192	4.32154	-0.67125	1.82578	87.5466	82.5955	814.48	2140.27	NaN	NaN	NaN	0.942398	10.25	0.0391636	0.289238
TCP	Eya4	heterozygote	male	26.25	21.6333	3.1	30.0714	29.7729	21.2188	8.26502	-0.298571	1.89057	90.7199	85.2896	1258.26	2968.78	0.166558	NaN	2.16033	0.939867	10	0.039064	0.288503
HMGU	Phactr4	heterozygote	male	21.9	20.6667	3.339	26.77	25.73	16.2725	8.02321	-1.04	2.08652	101.725	88.419	NaN	NaN	0.107143	NaN	1.49683	0.869313	10.6	0.053964	0.288286
BCM	Smarcad1	heterozygote	male	22.75	21.2333	3.1	25.525	25.775	18.446	3.09547	0.25	1.973	94.3578	90.1391	NaN	NaN	NaN	NaN	NaN	0.955525	11	0.0539307	0.288108
TCP	Ano6	heterozygote	male	26.4937	21.6792	3.1	28.0862	26.815	22.3458	4.7745	-1.27125	1.7999	87.3458	77.7178	671.472	1926.06	NaN	NaN	NaN	0.890489	10.25	0.0388542	0.286953
MRC Harwell	Bag3	heterozygote	male	19.2	21.6667	NaN	26.4286	26.2114	20.3917	4.78859	-0.217143	2.22444	108.34	94.6537	2700.9	3800.82	NaN	NaN	NaN	0.874032	10.1429	0.0388456	0.28689
MRC Harwell	Ctdsp1	homozygote	male	20.2083	21.8167	NaN	26.55	26.19	20.2425	4.48597	-0.36	2.18391	105.56	95.8013	2915.05	4079.49	NaN	NaN	NaN	0.906877	10.6667	0.0388366	0.286824
UC Davis	Klf14	homozygote	male	24.15	27.5606	3.1	27.2509	27.4418	21.1661	4.91028	0.190909	1.90831	91.5611	86.1261	NaN	NaN	NaN	NaN	NaN	0.940059	10.5455	0.0536837	0.286789
UC Davis	Pcgf2	heterozygote	male	24.15	28.05	3.1	26.9913	26.9838	20.6994	5.37755	-0.0075	1.89983	91.4966	84.5224	NaN	NaN	NaN	NaN	NaN	0.928117	11	0.0536213	0.286455
UC Davis	Mplkip	homozygote	male	24.15	26.0667	3.1	27.09	27.154	NaN	NaN	0.064	1.90303	91.2135	86.2222	NaN	NaN	NaN	NaN	NaN	0.94467	11	0.053616	0.286427
WTSI	Mir96	homozygote	male	21	20.5714	3.4	27.0286	26.9714	20.0894	6.15983	-0.0571429	2.02873	97.8205	89.8444	584.19	829.294	0.18941	3.88844	2.69448	0.9202	11.5714	0.0386923	0.285758
WTSI	Bivm	homozygote	male	21	21.2857	3.4	30.8714	30.1571	23.251	7.11773	-0.714286	2.09689	101.407	91.7912	428.644	671.664	0.184943	3.84422	2.63093	0.905352	11	0.0386318	0.285311
UC Davis	Iqub	homozygote	male	24.15	25.0143	3.1	28.2429	27.9957	21.2845	5.29373	-0.247143	1.94001	93.5249	85.9791	NaN	NaN	NaN	NaN	NaN	0.919355	11	0.0532119	0.284268
TCP	Fus	heterozygote	male	26.225	21.3583	3.1	26.1462	26.6925	19.7157	6.12304	0.54625	1.82548	87.9331	81.1538	1278.56	3232.63	0.161523	NaN	2.09502	0.922853	10.625	0.0384532	0.283992
RBRC	Clspn	heterozygote	male	23	20.0333	3.339	27.42	28.18	NaN	NaN	0.76	1.91018	91.9577	85.1152	299.219	300.314	0.185714	0.187905	2.5945	0.926069	11	0.0383311	0.283091
TCP	Notch4	homozygote	male	25.8438	21.9083	3.1	26.2312	26.7462	21.2364	4.76274	0.515	1.84726	88.812	82.7291	1380.4	3240.57	0.196364	NaN	2.54691	0.932483	10	0.0381224	0.281549
HMGU	Dnajb11	heterozygote	male	22.65	20.75	3.339	25.0667	24.3556	19.0309	2.8919	-0.711111	1.96514	94.8783	86.586	NaN	NaN	0.142857	NaN	1.99577	0.912274	10.3333	0.0523351	0.279584
BCM	Apeh	homozygote	male	22.75	21.2333	3.1	25.2667	25.6333	18.5473	3.63113	0.366667	1.96302	93.3186	91.6853	NaN	NaN	NaN	NaN	NaN	0.980359	10.6667	0.0523285	0.279549
WTSI	Mettl24	homozygote	male	21.5	20.9214	3.4	30.7429	30.2286	25.3213	5.61955	-0.514286	2.12585	103.564	90.367	1499.18	2230.44	0.184841	0.141497	2.62948	0.873471	11.8571	0.0378432	0.279487
TCP	Cln6	homozygote	male	27.3875	21.6792	3.1	25.0613	24.2075	20.3282	3.42376	-0.85375	1.70512	82.5222	74.4246	799.672	2256.76	0.143523	NaN	1.86155	0.900411	10.625	0.0372875	0.275383
WTSI	D6Wsu163e	homozygote	male	21	20.4286	3.4	27.6143	28.0714	21.3092	5.69467	0.457143	2.02749	97.3559	91.2314	338.972	535.44	0.232449	3.83537	3.30673	0.936513	11.5714	0.0372132	0.274834
MRC Harwell	Ube2e2	homozygote	male	19.6438	21.4875	NaN	27.4625	26.6262	19.8923	6.0411	-0.83625	2.21483	107.362	96.0632	2584.16	3686.25	NaN	NaN	NaN	0.895094	10	0.0370829	0.273872
ICS	Scaper	homozygote	male	21	21	3.145	21.7286	22.2714	16.7163	2.8595	0.542857	1.9499	93.6883	87.5325	935.903	1497.35	0.208571	0.115159	2.74452	0.933361	11	0.0369696	0.273035
WTSI	Smyd5	homozygote	male	21.5	21.2238	3.4	27.8857	27.1429	22.8843	5.19125	-0.742857	2.08401	102.324	85.7429	1842.7	2609.46	0.159082	0.120408	2.26303	0.838532	11.5714	0.0368598	0.272224
UC Davis	Gpr20	homozygote	male	24.15	27.1292	3.1	27.365	28.1062	20.7214	5.08291	0.74125	1.90919	91.3501	87.0685	NaN	NaN	NaN	NaN	NaN	0.953961	11	0.050865	0.271731
WTSI	Sik3	homozygote	male	21	20.4286	3.4	24.5571	24.6429	21.2047	2.73857	0.0857143	1.9698	95.3864	85.7839	368.814	583.348	0.191395	3.80408	2.7227	0.899679	11.2857	0.0367136	0.271144
HMGU	Pdgfc	heterozygote	male	22.1	20.6667	3.339	28.48	27.25	18.2732	7.50969	-1.23	2.12149	103.084	91.1333	NaN	NaN	0.129048	NaN	1.80284	0.883272	10.3	0.0506685	0.270681
MRC Harwell	Ppt2	homozygote	male	19.8438	20.9667	NaN	26.6125	25.39	20.1058	5.17819	-1.2225	2.18373	105.727	95.1667	2551.15	3593.33	NaN	NaN	NaN	0.901258	10.375	0.0364585	0.26926
TCP	Lypd3	heterozygote	male	26.4714	21.3714	3.1	27.0586	28.3257	20.6381	5.87518	1.26714	1.79623	85.8489	82.2599	931.311	2387.75	0.198395	NaN	2.57326	0.958597	10	0.0364532	0.269222
UC Davis	Ggnbp1	homozygote	male	24.15	28.4593	3.1	26.6411	26.5922	21.1399	5.08533	-0.0488889	1.88515	90.7768	83.9158	NaN	NaN	NaN	NaN	NaN	0.923995	10.8889	0.0503019	0.268723
HMGU	Nfatc3	heterozygote	male	24.3	20.75	3.339	25.6667	25.3	NaN	NaN	-0.366667	1.84047	89.1349	80.1111	NaN	NaN	0.142857	NaN	1.99577	0.899301	11	0.0501299	0.267804
WTSI	Tmem126a	homozygote	male	21.5	19.9333	3.4	31.1	30.8333	22.8965	9.00663	-0.266667	2.11387	102.709	90.8223	1180.65	1771.99	0.174444	0.12381	2.48158	0.884623	12	0.0362303	0.267575
MRC Harwell	Smurf1	heterozygote	male	18.1438	21.8167	NaN	27.3	NaN	22.217	5.58027	NaN	2.30631	110.921	103.146	2928.09	4116.19	NaN	NaN	NaN	0.927223	10.5	0.0361318	0.266848
HMGU	Ubac2	homozygote	male	21.875	20.6667	3.339	27.85	26.83	NaN	NaN	-1.02	2.11949	102.657	92.2222	NaN	NaN	0.141429	NaN	1.97581	0.898629	10.2	0.0497475	0.265761
HMGU	Tax1bp3	heterozygote	male	21.55	20.75	3.339	25.0556	24.2889	18.0656	3.64684	-0.766667	2.05672	99.8915	88.5119	NaN	NaN	0.133333	NaN	1.86272	0.88677	10.6667	0.0496572	0.265279
BCM	Pkia	homozygote	male	22.75	21.3867	3.1	24.28	23.98	17.4976	3.15935	-0.3	1.92776	93.1112	84.8053	NaN	NaN	NaN	NaN	NaN	0.909777	10.2	0.0490723	0.262153
HMGU	Syde1	homozygote	male	21.9944	20.6667	3.339	25.3889	25.0556	16.2177	6.54094	-0.333333	2.0287	97.9788	89.2734	NaN	NaN	0.15291	NaN	2.13621	0.910346	10.7778	0.0490587	0.262081
WTSI	Kera	homozygote	male	21	20.2857	3.4	29.5286	28.9857	21.9002	7.35329	-0.542857	2.06417	99.9077	90.0658	370.97	574.927	0.155057	3.8517	2.20577	0.900444	11.4286	0.0354719	0.261974
UC Davis	Chdh	homozygote	male	24.15	23.2333	3.1	28.9529	29.0457	20.6891	7.37526	0.0928571	1.8994	91.9685	82.7487	444.207	926.32	0.0937075	0.042449	1.21542	0.89986	10	0.0352606	0.260413
WTSI	Trp53rkb	homozygote	male	21.5	20.7	3.4	27.6429	27.2429	22.5246	4.51884	-0.4	2.04278	100.017	85.0539	1064.14	1681.85	0.159796	0.136735	2.27319	0.85037	11.4286	0.03524	0.260261
MRC Harwell	Atp2a2	heterozygote	male	20.5312	21.3917	NaN	26.85	25.7763	20.7953	4.7549	-1.07375	2.14498	103.539	94.587	2424.22	3446.32	NaN	NaN	NaN	0.913017	10.5	0.0350388	0.258775
UC Davis	Pfn4	homozygote	male	24.15	26.4714	3.1	27.5629	28.1843	21.1072	5.11697	0.621429	1.91293	91.6323	86.8693	NaN	NaN	NaN	NaN	NaN	0.947773	10	0.0481792	0.257383
MRC Harwell	Usp14	heterozygote	male	20.6938	21.375	NaN	26.45	25.9163	21.0534	4.1479	-0.53375	2.15917	104.057	95.8087	3069.14	4263.59	NaN	NaN	NaN	0.920665	10.25	0.0347762	0.256836
UC Davis	Ankub1	homozygote	male	24.15	26.9571	3.1	26.4971	26.4371	20.282	5.44117	-0.06	1.87797	89.8026	85.8347	NaN	NaN	NaN	NaN	NaN	0.95323	10.2857	0.0477875	0.25529
ICS	Dbn1	heterozygote	male	21	20.2857	3.145	24.8	25.8	15.9738	3.60651	1	2.00809	96.9248	88.5755	991.325	1533.64	0.263469	0.171905	3.46691	0.913363	9	0.0345322	0.255034
UC Davis	Mpig6b	homozygote	male	24.15	28.3333	3.1	28.1233	28.2867	20.6662	6.16996	0.163333	1.93063	93.2751	84.842	NaN	NaN	NaN	NaN	NaN	0.908734	10	0.0477073	0.254862
WTSI	Casp12	homozygote	male	21.5	21.1556	3.4	31.2167	30.8833	23.7438	7.29379	-0.333333	2.1207	103.533	89.3625	1310.56	1942.09	0.175899	0.15873	2.50228	0.863333	12	0.0344024	0.254075
HMGU	Cckar	homozygote	male	21.92	20.6667	3.339	27.49	26.18	17.4649	7.60774	-1.31	2.10154	101.702	91.7492	NaN	NaN	0.125714	NaN	1.75628	0.899262	10.7	0.0473493	0.252949
UC Davis	Tmem256	homozygote	male	24.15	27.6048	3.1	26.5486	28.5786	19.1223	6.57231	2.03	1.8788	88.8808	89.2985	NaN	NaN	NaN	NaN	NaN	1.00492	11	0.0469484	0.250807
WTSI	Os9	homozygote	male	21.5	20.9571	3.4	27.5	27.0429	23.1902	4.26064	-0.457143	2.05455	99.4624	89.5723	1393.65	2104.65	0.192143	0.162585	2.73335	0.90021	11	0.033846	0.249966
BCM	Brd4	heterozygote	male	22.75	21.2333	3.1	21.6143	22.0286	NaN	NaN	0.414286	1.83871	87.7976	84.4945	NaN	NaN	NaN	NaN	NaN	0.964315	10.8571	0.0464792	0.248301
HMGU	Rps26	homozygote	male	22.475	20.75	3.339	25.37	24.64	18.5949	4.10636	-0.73	1.98376	96.2607	85.6845	NaN	NaN	0.121429	NaN	1.6964	0.891497	10.8	0.0460676	0.246102
TCP	Nhs	hemizygote	male	26.2167	22.1222	3.1	27.5083	26.6417	21.3716	5.86893	-0.866667	1.83203	89.0592	78.5553	1094.69	2833.71	NaN	NaN	NaN	0.882893	10.6667	0.0332959	0.245904
WTSI	Adap1	homozygote	male	21.5	21.4048	3.4	30.6571	29.7143	22.4712	8.15533	-0.942857	2.11301	103.389	88.2124	1356.31	2055.51	0.142585	0.119048	2.02836	0.853253	11.5714	0.0332377	0.245474
UC Davis	Cnr1	heterozygote	male	24.15	27.2	3.1	26.5229	27.5971	20.3713	4.79594	1.07429	1.87683	90.2537	83.9818	NaN	NaN	NaN	NaN	NaN	0.931644	10.7143	0.0458168	0.244762
WTSI	Tuba3a	homozygote	male	21	21.125	3.4	31.2875	31.1125	23.5841	6.94872	-0.175	2.09507	100.675	94.0085	357.98	559.864	0.217004	3.87619	3.08701	0.933536	11.375	0.0329944	0.243677
UC Davis	Fastk	homozygote	male	24.15	27.2	3.1	28.0725	29.07	21.0282	5.75672	0.9975	1.92672	92.2515	87.6431	NaN	NaN	NaN	NaN	NaN	0.950401	11.75	0.0454403	0.242751
WTSI	Rbmx	hemizygote	male	21	20.5714	3.4	26.0286	25.8571	20.8312	4.96591	-0.171429	1.989	96.6633	85.3829	279.314	443.134	0.172982	3.71905	2.46077	0.883704	11.5714	0.032801	0.242249
UC Davis	AU021092	heterozygote	male	24.15	28.6167	3.1	27.435	26.54	21.1364	5.36079	-0.895	1.90584	91.8408	84.5943	NaN	NaN	NaN	NaN	NaN	0.921162	10	0.0452368	0.241664
TCP	Exoc8	heterozygote	male	26.9563	21.45	3.1	27.4138	28.0712	20.5502	6.19896	0.6575	1.81779	87.8136	79.9167	1505.64	3569.86	0.145275	NaN	1.88428	0.910124	10.5	0.0322976	0.23853
HMGU	Zfp69	homozygote	male	22.31	20.75	3.339	29.69	28.97	NaN	NaN	-0.72	2.1365	103.424	93.1679	NaN	NaN	0.139524	NaN	1.9492	0.901294	10.6	0.0445016	0.237736
UC Davis	Tbr1	heterozygote	male	24.15	23.2333	3.1	28.435	28.945	22.0371	5.63884	0.51	1.89471	91.245	84.3129	660.548	1150.3	0.100952	0.0646369	1.30939	0.924117	11	0.0321285	0.237281
UC Davis	Pdik1l	homozygote	male	24.15	26.6333	3.1	28.1743	28.5729	20.3215	7.23076	0.398571	1.92866	92.1428	88.4501	NaN	NaN	NaN	NaN	NaN	0.960693	10	0.0440808	0.235488
UC Davis	Acsl5	homozygote	male	24.15	27.1259	3.1	27.54	27.7878	20.8469	5.36362	0.247778	1.908	91.1958	87.3609	NaN	NaN	NaN	NaN	NaN	0.953249	10	0.043998	0.235046
MRC Harwell	Rsbn1	heterozygote	male	19.0562	21.2333	NaN	30.175	28.3113	21.7586	6.58864	-1.86375	2.33848	113.459	101.054	3558.24	4893.93	NaN	NaN	NaN	0.891031	10.75	0.0318252	0.235042
MRC Harwell	Sez6l	homozygote	male	20.505	21.81	NaN	27.45	25.239	21.8189	5.42052	-2.211	2.14535	104.664	90.6595	2185.27	3200.72	NaN	NaN	NaN	0.866258	10.5	0.0316926	0.234062
MRC Harwell	Slc17a3	homozygote	male	20.7625	21.7729	NaN	27.775	26.9162	20.1016	5.88178	-0.85875	2.15785	104.525	93.8589	2726.88	3729.29	NaN	NaN	NaN	0.901053	10.875	0.0316514	0.233758
MRC Harwell	Avp	heterozygote	male	21.35	21.9083	NaN	27.65	27.355	20.5299	5.35829	-0.295	2.0972	101.559	91.32	2012.28	3008.42	NaN	NaN	NaN	0.898499	10.25	0.0316399	0.233673
UC Davis	Bhlha9	homozygote	male	24.15	28.3333	3.1	25.665	28.275	NaN	NaN	2.61	1.84686	87.6475	86.7918	NaN	NaN	NaN	NaN	NaN	0.990232	10	0.0436705	0.233296
TCP	Ptpn12	heterozygote	male	26.0214	22.0524	3.1	27.1386	26.92	21.659	4.88445	-0.218571	1.82773	87.9577	81.5525	1006.35	2684.76	0.134545	NaN	1.74511	0.928018	10	0.0314146	0.232009
UC Davis	B3gnt7	homozygote	male	24.15	31.2476	3.1	26.7129	27.8943	NaN	NaN	1.18143	1.88043	90.009	85.6324	NaN	NaN	NaN	NaN	NaN	0.951815	10.5714	0.0432574	0.231089
UC Davis	Mpig6b	homozygote	male	24.15	37.9667	3.1	30.228	29.994	21.4422	7.3561	-0.234	1.91531	92.6641	83.7073	371.415	803.132	0.0926765	0.0442353	1.20205	0.903254	11	0.0312003	0.230427
MRC Harwell	Fbxl21	homozygote	male	20.5437	21.6667	NaN	26.5875	25.9025	NaN	NaN	-0.685	2.14594	103.667	94.3409	2680.82	3726.56	NaN	NaN	NaN	0.910148	11	0.0311758	0.230245
TCP	Stk31	homozygote	male	26.4688	21.6333	3.1	27.6125	27.1388	21.4303	5.36009	-0.47375	1.80885	86.9627	81.0175	973.761	2579.46	NaN	NaN	NaN	0.930901	10.375	0.0310216	0.229107
TCP	Abca6	homozygote	male	26.4875	21.4042	3.1	26.3238	26.0237	20.7529	4.90085	-0.3	1.78872	86.4058	78.653	1109.43	2752.55	0.117612	NaN	1.52547	0.91063	10.625	0.0302387	0.223324
WTSI	Gsto2	homozygote	male	21.5	20.9214	3.4	29.4286	28.9	NaN	NaN	-0.528571	2.09843	102.027	89.917	1686.23	2386.16	0.194558	0.142857	2.7677	0.880888	11	0.0299217	0.220984
UC Davis	Apof	homozygote	male	24.15	27.5542	3.1	29.1913	29.2225	21.485	6.335	0.03125	1.95866	94.2351	87.477	NaN	NaN	NaN	NaN	NaN	0.92786	10.875	0.0410932	0.219528
UC Davis	Tmbim7	homozygote	male	24.15	26.0667	3.1	25.5675	26.0925	19.2006	5.97812	0.525	1.84088	87.977	84.3259	NaN	NaN	NaN	NaN	NaN	0.958977	10	0.0408558	0.21826
HMGU	Car4	heterozygote	male	24.2	20.75	3.339	27.5286	26.3571	NaN	NaN	-1.17143	1.89939	93.0748	78.8044	NaN	NaN	0.0843537	NaN	1.17845	0.847598	11	0.040058	0.213998
KMPC	Slc25a1	heterozygote	male	22	20	NaN	31.5212	31.1737	21.9411	8.74038	-0.3475	2.2335	107.58	99.3198	2154.51	5633.44	0.165595	0.111667	NaN	0.922674	11	0.0287995	0.212696
TCP	Pmm2	heterozygote	male	26.35	22.0458	3.1	26.9812	25.6575	21.8422	4.74022	-1.32375	1.77585	86.0212	77.241	708.742	1919.65	NaN	NaN	NaN	0.896021	10.875	0.0287616	0.212416
MRC Harwell	Il12a	homozygote	male	20.0167	21.15	NaN	27.9667	26.72	21.8429	5.72724	-3.68	2.18442	104.973	98.0025	2362.93	3365.82	NaN	NaN	NaN	0.932749	10.5	0.0287356	0.212223
HMGU	Ndufb9	heterozygote	male	22.1	20.75	3.339	29.6111	28.2444	21.9424	5.24597	-1.36667	2.14716	104.474	91.7302	NaN	NaN	0.129101	NaN	1.80358	0.879479	10.5556	0.0396539	0.211839
UC Davis	Pfkfb4	homozygote	male	24.15	27.4429	3.1	30.6129	31.0986	23.1235	6.30252	0.485714	2.00325	95.81	91.5025	NaN	NaN	NaN	NaN	NaN	0.954783	11.4286	0.0395812	0.21145
TCP	Adnp2	homozygote	male	26.0687	21.2208	3.1	24.9512	24.3762	19.5923	5.34891	-0.575	1.79913	86.9945	78.8045	1414.14	3192.55	NaN	NaN	NaN	0.908787	10.875	0.0284042	0.209777
UC Davis	Synm	homozygote	male	24.15	27.2524	3.1	28.5343	28.5857	21.4097	6.15628	0.0514286	1.9355	93.025	86.7857	NaN	NaN	NaN	NaN	NaN	0.931122	11	0.039249	0.209676
WTSI	Kcnv2	homozygote	male	21.5	20.7357	3.4	27.7143	26.9714	NaN	NaN	-0.742857	2.05673	101.236	83.7243	1546.92	2205.53	0.165057	0.139456	2.34803	0.829467	11.1429	0.0280955	0.207497
WTSI	Dop1b	homozygote	male	21.5	21.2048	3.4	29.7714	28.8714	24.6858	5.29381	-0.9	2.08536	102.17	86.5827	1312.97	1921.08	0.168503	0.127891	2.39706	0.84603	11.5714	0.0277411	0.204879
UC Davis	Selenbp1	homozygote	male	24.15	27.2	3.1	28.8257	29.7957	21.8947	5.81288	0.97	1.94401	93.069	88.4678	NaN	NaN	NaN	NaN	NaN	0.950977	11	0.0383064	0.20464
WTSI	Vwa3a	homozygote	male	21	21.4286	3.4	31.6429	30.3143	23.036	8.13256	-1.32857	2.09949	101.985	90.2953	415.295	637.133	0.164354	3.95578	2.33803	0.88489	11.1429	0.0276517	0.204218
MRC Harwell	Rhbdl3	homozygote	male	18.9167	21.4889	NaN	26.7333	26.17	22.1406	3.47361	-0.563333	2.24793	107.981	101.01	2961.82	4170.38	NaN	NaN	NaN	0.93558	10	0.0275475	0.203449
TCP	Ppp2r2b	homozygote	male	26.6438	21.5417	3.1	26.5675	26.6513	20.2768	5.84206	0.08375	1.8188	87.2832	82.0257	1607.83	3722.64	0.18303	NaN	2.37398	0.939004	10.25	0.0273519	0.202004
MRC Harwell	Ramp1	homozygote	male	20.5562	20.2667	NaN	27.5375	26.7475	19.9591	7.21813	-0.79	2.14315	103.707	93.593	2386.67	3286.46	NaN	NaN	NaN	0.902612	10.625	0.0272868	0.201524
WTSI	Ccdc127	homozygote	male	21	20.7143	3.4	28.3	28.1143	23.2439	5.38256	-0.185714	2.03134	97.6327	91.078	357.263	553.884	0.185918	3.81837	2.6448	0.933029	11.5714	0.0271408	0.200445
TCP	Tox3	heterozygote	male	26.2531	21.6333	3.1	26.1212	25.8714	19.8626	6.02892	-0.249812	1.77677	86.3737	76.1836	880.029	2292.4	0.129659	NaN	1.68173	0.885592	10.625	0.0271137	0.200246
BCM	Cdkl2	homozygote	male	22.75	21.2333	3.1	27.3571	27.0286	18.876	5.13747	-0.328571	2.01575	98.1502	85.8639	NaN	NaN	NaN	NaN	NaN	0.875276	10	0.0372548	0.199022
TCP	Egr1	heterozygote	male	26.7	20.9	3.1	26.2237	26.0525	20.7023	4.999	-0.17125	1.74818	84.3611	77.1765	798.601	2114.77	0.184857	NaN	2.39767	0.914625	10.875	0.02688	0.19852
MRC Harwell	Cd5l	homozygote	male	20.5437	21.8167	NaN	26.8625	26.0063	21.0822	4.6812	-0.85625	2.13433	103.175	93.5865	2387.96	3394.76	NaN	NaN	NaN	0.906958	10.75	0.0267596	0.19763
TCP	Asxl2	homozygote	male	26.3167	21.6333	3.1	25.3733	24.9933	NaN	NaN	-0.38	1.84187	88.4148	82.9782	1919.77	4504.01	NaN	NaN	NaN	0.93884	10.6667	0.0267318	0.197425
WTSI	Rasal2	homozygote	male	21.5	20.8905	3.4	28.6286	27.8143	22.8544	5.8443	-0.814286	2.06057	100.489	87.2146	1216.91	1875.27	0.179603	0.130612	2.55496	0.867229	11.2857	0.0267315	0.197422
BCM	Ces1a	homozygote	male	22.75	21.2333	3.1	25.1143	25.1429	16.7528	4.98672	0.0285714	1.94262	92.6936	89.5034	NaN	NaN	NaN	NaN	NaN	0.966626	10	0.0368691	0.196962
BCM	Pptc7	homozygote	male	22.75	21.2333	3.1	24.4	25.2	18.1891	2.75055	0.8	1.91933	91.1486	89.9774	NaN	NaN	NaN	NaN	NaN	0.987151	11	0.0367542	0.196348
HMGU	Ap4e1	homozygote	male	24.4	20.75	3.339	26.2625	25.3125	NaN	NaN	-0.95	1.83778	89.8512	76.9762	NaN	NaN	0.106548	NaN	1.48851	0.854776	10	0.0367096	0.196109
WTSI	Sh3bp4	homozygote	male	21	20.7143	3.4	27.2286	26.8143	20.8804	5.55622	-0.414286	2.01398	96.8529	90.1034	447.357	659.874	0.174762	3.62721	2.48609	0.930389	11.1429	0.026457	0.195395
HMGU	Pla2g10	homozygote	male	24.2214	20.75	3.339	25.4714	24.8	NaN	NaN	-0.671429	1.82721	88.801	78.4354	NaN	NaN	0.12449	NaN	1.73917	0.883216	10.4286	0.0364439	0.19469
UC Davis	Adam8	homozygote	male	24.15	23.2333	3.1	28.695	29.6	23.0513	4.17796	0.905	1.89142	90.5236	86.1726	542.345	1085.62	0.0935714	0.0588095	1.21366	0.952929	11	0.0262569	0.193918
UC Davis	Htra4	homozygote	male	24.15	27.3619	3.1	27.0671	27.4157	20.8579	5.2276	0.348571	1.88485	90.0972	86.2726	NaN	NaN	NaN	NaN	NaN	0.957413	11	0.0361846	0.193305
MRC Harwell	Cyb5r2	homozygote	male	19.535	20.66	NaN	26.9	25.898	21.5743	4.20663	-1.002	2.20219	106.241	97.3244	2651.68	3777.13	NaN	NaN	NaN	0.915952	10.3	0.0261171	0.192885
UC Davis	Unc13b	homozygote	male	24.15	27.0111	3.1	23.83	24.32	19.4963	3.29385	0.49	1.77969	85.1171	81.2933	NaN	NaN	NaN	NaN	NaN	0.953102	10.6667	0.0360185	0.192418
BCM	Aldob	homozygote	male	22.75	21.2333	3.1	20.2143	19.8714	14.6018	2.62406	-0.342857	1.78266	86.2443	77.9184	NaN	NaN	NaN	NaN	NaN	0.903361	10.2857	0.0358434	0.191482
UC Davis	Kmo	homozygote	male	24.15	27.7667	3.1	30.1271	30.6129	NaN	NaN	0.485714	1.98348	95.0427	89.963	NaN	NaN	NaN	NaN	NaN	0.946318	11	0.0355601	0.189969
WTSI	Cyp2r1	homozygote	male	21	21.4	3.4	33.78	32.82	23.8938	10.3888	-0.96	2.14167	104.895	89.0429	467.393	713.966	0.153302	3.90095	2.18081	0.848894	11.8	0.0257042	0.189836
WTSI	Zfp239	homozygote	male	21	20.5714	3.4	30.4143	29.6571	22.6334	7.38129	-0.757143	2.07469	100.43	90.478	438.18	661.297	0.192902	3.94898	2.74415	0.901515	11.2857	0.0256472	0.189415
WTSI	Hpf1	homozygote	male	21	21.1429	3.4	27.9857	27.2286	21.7874	5.60332	-0.757143	2.01935	97.8436	87.7346	274.365	437.271	0.163401	3.8068	2.32448	0.897536	11.1429	0.0256022	0.189082
TCP	Gtpbp2	homozygote	male	26.5	21.7556	3.1	28.0667	26.8333	20.4992	7.0165	-1.23333	1.87807	91.7355	78.9698	1718.44	4374.71	0.0769697	NaN	0.998328	0.86266	10.3333	0.0255398	0.188622
TCP	Asxl2	heterozygote	male	26.4625	22	3.1	26.5825	26.3388	NaN	NaN	-0.24375	1.80174	86.6858	80.4676	1237.71	3057.23	NaN	NaN	NaN	0.928366	10.5	0.0254648	0.188067
TCP	Zgpat	homozygote	male	26.3571	21.0571	3.1	25.94	25.9429	21.2849	4.27512	0.00285714	1.8136	87.2129	81.1534	1354.8	3554.63	0.182619	NaN	2.36864	0.931185	10.7143	0.0254234	0.187762
MRC Harwell	Cfi	homozygote	male	20.1625	22.4833	NaN	26.5375	25.5862	20.5834	5.23385	-0.95125	2.1526	104.563	92.5885	2492.69	3546.61	NaN	NaN	NaN	0.886411	10	0.0254051	0.187626
WTSI	Crls1	heterozygote	male	21	21	3.4	28.9857	28.2571	22.845	5.86044	-0.728571	2.04253	98.3909	90.7928	358.282	554.026	0.168299	3.87823	2.39416	0.922842	11.1429	0.0250874	0.18528
BCM	Trim31	homozygote	male	22.75	21.2333	3.1	24.9167	24.8167	17.1365	4.54513	-0.1	1.93397	92.7821	87.3199	NaN	NaN	NaN	NaN	NaN	0.941496	11	0.0346336	0.185019
MRC Harwell	Cybb	hemizygote	male	20.4812	20.8854	NaN	26.7675	25.5337	20.1084	6.31055	-1.23375	2.12356	102.965	92.0047	2240.9	3120.56	NaN	NaN	NaN	0.892542	10.5	0.0248388	0.183445
WTSI	Zscan2	homozygote	male	21.5	20.9857	3.4	28.8571	28.4	23.5654	5.17187	-0.457143	2.06863	100.216	89.9306	1340.61	2023.11	0.186048	0.146939	2.64664	0.898156	11.5714	0.0248188	0.183297
WTSI	Slc25a30	homozygote	male	21.5	20.7143	3.4	28.6857	28.6857	25.146	3.32052	-5.07531e-16	2.05187	99.0085	90.6106	1086.61	1666.98	0.204966	0.157143	2.91576	0.916021	11.5714	0.0247672	0.182916
HMGU	Dnajc27	homozygote	male	23.05	20.75	3.339	23.4222	22.8	NaN	NaN	-0.622222	1.8591	90.0926	80.7235	NaN	NaN	0.131746	NaN	1.84054	0.895114	11	0.0340359	0.181827
MRC Harwell	Nisch	heterozygote	male	20.1167	20.1167	NaN	26.1667	25.3317	20.3471	6.24008	-0.835	2.16756	104.694	95.3519	2941.67	4090.69	NaN	NaN	NaN	0.911033	11	0.0246115	0.181766
UC Davis	Tmem114	homozygote	male	24.15	23.2333	3.1	23.545	23.62	17.8208	5.09347	0.075	1.79089	85.941	80.7763	511.238	1100.76	0.0988095	0.0471429	1.2816	0.939842	10.5	0.0245243	0.181122
UC Davis	Endou	homozygote	male	24.15	23.2333	3.1	28.15	27.92	21.6739	5.66452	-0.23	1.88233	90.6131	83.8885	684.667	1176.6	0.100714	0.0693333	1.3063	0.925787	10	0.0242544	0.179128
WTSI	Rpgrip1l	heterozygote	male	21.5	20.4	3.4	30.3571	29.3143	NaN	NaN	-1.04286	2.09872	103.187	85.8461	1402.26	2070.22	0.166122	0.129252	2.36319	0.831078	12	0.0241851	0.178617
WTSI	Tcf7l2	heterozygote	male	21.5	20.6944	3.4	26.4667	26.2	22.5694	4.16786	-0.266667	2.03566	98.5315	88.8076	1634.87	2389.8	0.177857	0.169048	2.53012	0.901052	11.5	0.02416	0.178432
MRC Harwell	P2rx4	homozygote	male	19.675	21.75	NaN	26.2875	24.7975	19.3832	6.26552	-1.49	2.19141	107.212	91.5355	2999.28	4057.77	NaN	NaN	NaN	0.854369	10.25	0.0239953	0.177215
UC Davis	Arhgap19	homozygote	male	24.15	26.4208	3.1	26.82	27.5975	21.1023	4.26539	0.7775	1.87332	89.9199	84.4125	NaN	NaN	NaN	NaN	NaN	0.939402	10	0.0326679	0.174518
ICS	Trmt1	heterozygote	male	21	20.5714	3.145	26.9286	27.4	19.713	2.09168	0.471429	2.02417	98.2768	87.2331	719.74	1166.3	0.231088	0.165794	3.04082	0.887206	10.5714	0.0233734	0.172622
UC Davis	2700097O09Rik	homozygote	male	24.15	29.8714	3.1	26.4557	27.0871	19.873	5.32767	0.631429	1.86098	89.5469	83.0755	NaN	NaN	NaN	NaN	NaN	0.929832	10.7143	0.0321461	0.17173
WTSI	Cd55b	homozygote	male	21.5	20.675	3.4	28.1333	27.9167	23.8543	3.97033	-0.216667	2.05287	98.7858	91.6216	1301.6	2018.26	0.186138	0.164286	2.64792	0.926828	12	0.0232063	0.171387
UC Davis	Retsat	homozygote	male	24.15	26.0667	3.1	26.05	27.19	19.4266	5.65291	1.14	1.84762	88.9996	82.1379	NaN	NaN	NaN	NaN	NaN	0.922902	10	0.0319421	0.170641
UC Davis	Afap1l2	homozygote	male	24.15	26.5524	3.1	23.89	24.3871	19.1383	3.12237	0.497143	1.7775	84.8496	81.7727	NaN	NaN	NaN	NaN	NaN	0.964633	10.4286	0.0318801	0.17031
WTSI	Sfxn3	homozygote	male	21	21.4286	3.4	31.9571	31.0286	23.8063	8.14352	-0.928571	2.10094	102.564	88.5473	429.362	639.517	0.172086	3.84694	2.44803	0.863209	12	0.0229517	0.169507
WTSI	Tcte1	homozygote	male	21.5	20.875	3.4	28.2375	28.175	23.2564	4.93062	-0.0625	2.05901	99.9362	88.8495	1462.69	2136.44	0.197262	0.166071	2.80617	0.888991	11	0.0228873	0.169032
KMPC	Asb2	heterozygote	male	22	20	NaN	27.5437	26.945	22.2499	4.93402	-0.59875	2.09964	100.947	94.0275	1944.29	4278.57	0.155782	0.136349	NaN	0.928741	10.75	0.0226964	0.167622
UC Davis	Col6a2	homozygote	male	24.15	26.6333	3.1	27.2857	27.6571	NaN	NaN	0.371429	1.88711	91.2297	82.7248	NaN	NaN	NaN	NaN	NaN	0.906471	10.7143	0.0313513	0.167485
MRC Harwell	Btrc	homozygote	male	19.8917	21.3	NaN	24.9167	24.6417	18.9173	4.68632	-0.275	2.15432	105.236	90.5602	2916.64	4115.78	NaN	NaN	NaN	0.860142	10.8333	0.0226388	0.167197
HMGU	Il4i1	homozygote	male	22.4	20.6667	3.339	26.2	26	NaN	NaN	-0.2	2.00149	96.7619	87.7302	NaN	NaN	0.138095	NaN	1.92924	0.90666	11	0.0304264	0.162544
HMGU	Rcn1	homozygote	male	22.1125	20.75	3.339	26.25	25.9	17.9283	6.45852	-0.35	2.0278	98.0446	88.8452	NaN	NaN	0.14881	NaN	2.07892	0.907139	10.25	0.0303873	0.162335
MRC Harwell	Daam1	heterozygote	male	20.8438	21	NaN	26.35	25.4887	20.5917	4.08225	-0.86125	2.10302	101.62	92.3609	2336.79	3378.16	NaN	NaN	NaN	0.909446	10.375	0.0218364	0.161271
WTSI	Dhrs2	homozygote	male	21.5	20.9714	3.4	28.6143	28.3143	23.1136	5.35686	-0.3	2.0581	100.198	87.7189	1233.94	1948.01	0.18898	0.155102	2.68835	0.87469	11.8571	0.0217989	0.160993
TCP	Clmn	homozygote	male	26.3	21.7905	3.1	26.1929	26.19	20.5364	5.13808	-0.00285714	1.77324	85.5741	78.2704	900.116	2372.2	0.16	NaN	2.07526	0.914846	10.8571	0.0216797	0.160113
UC Davis	Slc39a5	homozygote	male	24.15	27.2	3.1	29.6371	30.2014	22.1869	5.84572	0.564286	1.96198	94.4409	87.4611	NaN	NaN	NaN	NaN	NaN	0.925475	11	0.0299507	0.160003
UC Davis	P2ry13	homozygote	male	24.15	30.4111	3.1	25.7817	26.195	19.8692	5.17883	0.413333	1.83681	87.7746	84.1667	NaN	NaN	NaN	NaN	NaN	0.960542	10.8333	0.029835	0.159384
WTSI	Dars2	heterozygote	male	21.5	21.25	3.4	28.0714	27.4857	22.6581	5.44247	-0.585714	2.04112	100.158	84.1917	1174.14	1782.35	0.165442	0.134694	2.35351	0.840665	11.7143	0.0215258	0.158977
MARC	Bend3	heterozygote	male	24	33.6964	NaN	27.1714	26.9571	21.0222	5.77193	-0.214286	1.89444	91.8352	82.1512	NaN	NaN	NaN	NaN	NaN	0.899188	11	0.0294855	0.157517
BCM	Gyg	heterozygote	male	22.75	22	3.1	26.3429	26.3286	18.2659	4.47653	-0.0142857	1.97505	94.6011	89.7162	NaN	NaN	NaN	NaN	NaN	0.948475	10	0.0294582	0.157371
MRC Harwell	Rapsn	heterozygote	male	20.1875	20.2437	NaN	28.8375	28.5367	22.6501	5.52177	-0.23	2.19508	105.768	97.4735	2531.2	3641.33	NaN	NaN	NaN	0.922728	11	0.0212588	0.157005
WTSI	Tmc3	homozygote	male	21	21	3.4	33.325	31.4	22.8966	11.8937	-1.925	2.1351	105.468	85.5823	614.5	894.045	0.0975	3.65714	1.387	0.811246	12	0.0211314	0.156064
MRC Harwell	Atp1a3	heterozygote	male	17.7875	21.7667	NaN	27.325	26.7775	21.5622	4.62641	-0.5475	2.32046	111.744	103.271	3113.45	4377.47	NaN	NaN	NaN	0.923796	10.75	0.0211081	0.155892
TCP	4930402H24Rik	homozygote	male	26.675	21.4042	3.1	26.1088	25.3362	21.3217	4.33896	-0.7725	1.76885	85.255	78.4583	1152.56	2844.95	0.195476	NaN	2.5354	0.918369	10.375	0.0209533	0.154748
UC Davis	Exosc3	heterozygote	male	24.15	28.9	3.1	27.43	27.8486	21.0461	5.1861	0.418571	1.88919	91.4421	82.4184	NaN	NaN	NaN	NaN	NaN	0.900443	11	0.0287567	0.153624
HMGU	Ndufa10	heterozygote	male	22.1	20.75	3.339	27.51	26.64	16.131	8.48165	-0.87	2.06774	100.625	88.2798	NaN	NaN	0.117143	NaN	1.63653	0.877099	10.7	0.028376	0.15159
TCP	Acvr1b	heterozygote	male	26.0125	21.5417	3.1	30.245	28.5562	22.8604	6.78586	-1.68875	1.85954	90.9435	77.7871	809.101	2214.97	0.110628	NaN	1.43489	0.856449	10.75	0.0204992	0.151395
MRC Harwell	C8b	homozygote	male	20.2188	20.8	NaN	25.6125	25.475	18.8522	5.8258	-0.1375	2.14518	103.298	95.491	2862.75	4033.99	NaN	NaN	NaN	0.924241	10.875	0.0204538	0.151059
WTSI	Cnot4	heterozygote	male	21	21	3.4	25.5857	25.1	20.4923	4.55672	-0.485714	1.96898	95.3581	85.707	301.596	472.355	0.178753	3.88367	2.54287	0.897825	11.7143	0.020225	0.14937
UC Davis	Fam210b	homozygote	male	24.15	27.3619	3.1	26.5614	27.2314	19.523	5.87896	0.67	1.85971	88.8417	85.3125	NaN	NaN	NaN	NaN	NaN	0.960194	11	0.0274418	0.1466
HMGU	Cpeb4	heterozygote	male	22.075	20.6667	3.339	26.025	24.825	16.9503	6.56414	-1.2	2.02067	97.6726	88.629	NaN	NaN	0.135714	NaN	1.89598	0.90798	10.625	0.0273244	0.145972
HMGU	Nutf2	heterozygote	male	23.55	20.75	3.339	26.675	25.675	16.6698	6.73841	-1	1.91464	93.2932	81.3214	NaN	NaN	0.126786	NaN	1.77124	0.871603	10.75	0.027082	0.144677
UC Davis	Caskin2	homozygote	male	24.15	27.2	3.1	26.1686	26.52	20.2305	4.65023	0.351429	1.8465	88.4245	83.9452	NaN	NaN	NaN	NaN	NaN	0.950453	10.5714	0.0269765	0.144114
MRC Harwell	Sirt3	homozygote	male	19.6278	21.1111	NaN	24.3889	24.0578	19.5407	3.72818	-0.331111	2.14249	104.026	92.3129	2704.22	3785.47	NaN	NaN	NaN	0.887475	10	0.0194601	0.14372
UC Davis	Ccl27a	homozygote	male	24.15	23.2333	3.1	26.0067	26.11	20.6409	4.56671	0.103333	1.83024	87.7333	82.8934	523.81	1019.4	0.0943651	0.0665238	1.22395	0.943218	11	0.0194387	0.143562
MRC Harwell	Ovgp1	homozygote	male	20.3062	21	NaN	27.6375	25.99	20.8719	6.20547	-1.6475	2.17098	105.168	94.4037	2739.14	3842.19	NaN	NaN	NaN	0.897969	10.75	0.0190411	0.140626
UC Davis	Gkn1	homozygote	male	24.15	23.2333	3.1	23.21	23.2114	19.106	3.23436	0.00142857	1.77344	85.4733	78.6735	454.187	955.786	0.080034	0.0468707	1.03807	0.919653	10	0.0190044	0.140355
MRC Harwell	Cmpk2	homozygote	male	20.3429	21.8238	NaN	27.3429	25.4443	20.869	5.98679	-1.89857	2.14735	104.12	93.0304	2387.22	3420.32	NaN	NaN	NaN	0.894783	10.1429	0.0189103	0.13966
TCP	Ctla2b	heterozygote	male	25.7929	21.581	3.1	26.9143	26.5971	21.3645	4.7855	-0.317143	1.82891	88.3708	80.3341	1106.29	2844.53	0.146508	NaN	1.90027	0.908758	10.7143	0.0188046	0.13888
HMGU	Lct	homozygote	male	22.7	20.75	3.339	27.48	26.61	NaN	NaN	-0.87	2.01251	97.1679	88.6655	NaN	NaN	0.14619	NaN	2.04234	0.91271	10	0.0257365	0.137489
HMGU	Vdac1	homozygote	male	22.45	20.75	3.339	25.6667	25.2667	20.4299	3.10386	-0.4	1.97445	94.8492	88.7024	NaN	NaN	0.157143	NaN	2.19534	0.935185	11	0.0249857	0.133479
HMGU	Nup35	heterozygote	male	21.6875	20.6667	3.339	27.6125	26.7875	19.0936	6.95237	-0.825	2.10287	101.806	91.6667	NaN	NaN	0.139286	NaN	1.94587	0.90073	10.5	0.0247105	0.132008
UC Davis	Nudt14	homozygote	male	24.15	27.4833	3.1	26.3137	26.2312	NaN	NaN	-0.0825	1.84863	88.6348	83.6569	NaN	NaN	NaN	NaN	NaN	0.943786	11	0.0244013	0.130357
UC Davis	Fgfbp3	homozygote	male	24.15	27.2	3.1	27.0271	27.86	20.0633	6.28602	0.832857	1.87166	90.1218	83.335	NaN	NaN	NaN	NaN	NaN	0.925616	11	0.0242923	0.129774
UC Davis	Pnck	hemizygote	male	24.15	27.9556	3.1	27.19	27.8883	20.7901	5.03364	0.698333	1.87687	90.2058	84.1617	NaN	NaN	NaN	NaN	NaN	0.931063	11	0.0242212	0.129394
WTSI	Prkab1	homozygote	male	21	20.4286	3.4	26.6714	26.0857	22.0532	4.47275	-0.585714	2.00209	96.9768	87.0942	584.229	868.513	0.185896	4.20068	2.64448	0.900446	11.7143	0.0174691	0.129016
UC Davis	Popdc3	homozygote	male	24.15	26.9571	3.1	27.2629	27.35	20.2268	5.65424	0.0871429	1.87888	90.2748	84.3503	NaN	NaN	NaN	NaN	NaN	0.933742	11	0.0238685	0.12751
WTSI	Coro1c	homozygote	male	21.5	20.3667	3.4	33.4	31.7	24.4592	10.2247	-1.7	2.1861	107.965	87.7042	2227.71	3017.09	0.10381	0.128571	1.47675	0.812339	11	0.0172033	0.127053
HMGU	Prkd2	homozygote	male	21.95	20.6667	3.339	26.57	24.88	16.37	8.28203	-1.69	2.04554	100.448	84.1159	NaN	NaN	0.0933333	NaN	1.3039	0.837989	10.9	0.0237691	0.126979
UC Davis	C9orf72	homozygote	male	24.15	27.6958	3.1	27.005	27.4025	21.8344	3.51574	0.3975	1.87008	89.5538	85.0161	NaN	NaN	NaN	NaN	NaN	0.948039	10.75	0.0234243	0.125137
UC Davis	Ypel3	homozygote	male	24.15	27.2	3.1	24.6429	24.8671	19.1897	4.56376	0.224286	1.79341	85.8559	81.6254	NaN	NaN	NaN	NaN	NaN	0.951948	11	0.023373	0.124863
UC Davis	Notch3	homozygote	male	24.15	27.3619	3.1	27.0443	27.3929	21.9544	4.13338	0.348571	1.87104	89.6764	84.7876	NaN	NaN	NaN	NaN	NaN	0.945704	10.1429	0.0231152	0.123486
UC Davis	Pla2g4b	homozygote	male	24.15	26.0667	3.1	28.7557	28.8943	21.0316	6.99973	0.138571	1.92644	92.1199	88.0523	NaN	NaN	NaN	NaN	NaN	0.955936	10.8571	0.0230047	0.122896
BCM	Cilp	heterozygote	male	22.75	21.2333	3.1	27.1	26.2	18.8363	3.52422	-0.9	1.99295	96.0316	88.4869	NaN	NaN	NaN	NaN	NaN	0.921436	10	0.0227992	0.121798
WTSI	Usp22	heterozygote	male	21.5	20.9786	3.4	28.1857	27.5571	23.5441	4.68268	-0.628571	2.03998	99.1661	87.4807	1209.66	1829.19	0.179354	0.148299	2.55141	0.88161	11.7143	0.0164224	0.121286
HMGU	Rora	heterozygote	male	24.3	20.75	3.339	26.95	25.35	NaN	NaN	-1.6	1.85452	90.878	76.936	NaN	NaN	0.089881	NaN	1.25567	0.846732	11	0.0225546	0.120491
WTSI	Gpr152	homozygote	male	21	21.6667	3.4	29.45	28.1333	21.3954	7.99905	-1.31667	2.03935	100.034	84.2531	308.758	474.379	0.124841	4.07857	1.77594	0.843067	11	0.015956	0.117841
UC Davis	Asic5	homozygote	male	24.15	23.2333	3.1	25.74	26.05	NaN	NaN	0.31	1.81866	87.3458	81.7719	458.095	945.536	0.115476	0.0411905	1.49777	0.935502	10.5	0.0157871	0.116594
UC Davis	Fjx1	homozygote	male	24.15	27.3889	3.1	27.8617	27.5467	NaN	NaN	-0.315	1.89621	91.8159	82.6024	NaN	NaN	NaN	NaN	NaN	0.899596	10.8333	0.0217703	0.116301
WTSI	Galntl5	homozygote	male	21	21.4286	3.4	31.0143	29.5143	23.7874	6.85071	-1.5	2.07092	100.969	87.744	332.446	523.594	0.145374	3.83537	2.06803	0.869219	11.2857	0.0154849	0.114362
UC Davis	Ctdspl	homozygote	male	24.15	26.35	3.1	28.4612	28.9575	21.0113	6.37065	0.49625	1.91516	92.0907	85.7195	NaN	NaN	NaN	NaN	NaN	0.930735	10.875	0.021278	0.113671
UC Davis	Gpr65	homozygote	male	24.15	31.3083	3.1	27.5312	28.2375	21.2003	5.17341	0.70625	1.88498	90.1231	86.2087	NaN	NaN	NaN	NaN	NaN	0.957865	10.625	0.0212615	0.113583
HMGU	Slc22a4	homozygote	male	22.1	20.6667	3.339	25.325	24.275	15.7422	6.91414	-1.05	1.98974	97.006	84.3214	NaN	NaN	0.104762	NaN	1.46356	0.871742	10	0.0212529	0.113537
MRC Harwell	Cab39l	homozygote	male	20.0312	21.0167	NaN	26.45	25.7538	20.7422	5.96648	-0.69625	2.14161	104.264	91.2768	2407.35	3391.72	NaN	NaN	NaN	0.875832	10.25	0.0149887	0.110698
TCP	Prkab1	homozygote	male	27.2417	21.8167	3.1	24.7	25.4533	20.2603	3.96101	0.753333	1.70644	81.5998	77.9967	1155.95	2868	NaN	NaN	NaN	0.955763	10.6667	0.0148462	0.109645
UC Davis	Olah	homozygote	male	24.15	27.4833	3.1	27.375	27.735	21.3227	4.85191	0.36	1.87898	89.459	87.2784	NaN	NaN	NaN	NaN	NaN	0.975243	11	0.0203292	0.108603
TCP	Tcf19	homozygote	male	27.4688	21.45	3.1	26.4925	26.5925	21.6391	4.51814	0.1	1.71546	82.3855	77.1466	897.952	2513.2	0.190926	NaN	2.47639	0.937698	10	0.0146557	0.108238
UC Davis	Txndc5	heterozygote	male	24.15	32.903	3.1	27.7218	27.4745	20.9516	5.85011	-0.247273	1.8895	91.6271	81.826	NaN	NaN	NaN	NaN	NaN	0.892762	11	0.0195995	0.104704
UC Davis	Mid1ip1	homozygote	male	24.15	26.7143	3.1	30.0629	30.48	22.7425	5.56493	0.417143	1.96523	93.8418	90.2989	NaN	NaN	NaN	NaN	NaN	0.962266	10.7143	0.0193971	0.103623
WTSI	Ift80	heterozygote	male	21.5	21.2976	3.4	29.0571	28.7571	NaN	NaN	-0.3	2.07753	100.931	89.307	1662.1	2445.81	0.19	0.150272	2.70286	0.884924	11.5714	0.0139384	0.102941
UC Davis	Mas1	homozygote	male	24.15	26.0667	3.1	29.6814	30.0171	21.9716	5.51528	0.335714	1.95255	93.3788	89.2077	NaN	NaN	NaN	NaN	NaN	0.955678	11	0.0190847	0.101954
HMGU	Ndufs1	heterozygote	male	24.7	20.75	3.339	26.54	26.38	16.5674	6.55125	-0.16	1.80301	86.5905	81.081	NaN	NaN	0.147619	NaN	2.06229	0.93688	11	0.0187414	0.10012
UC Davis	Bfsp1	homozygote	male	24.15	23.2333	3.1	28.33	29.01	21.5565	5.55178	0.68	1.88434	90.2918	85.4688	808.024	1424.69	0.118571	0.0461905	1.53792	0.946584	11	0.0134536	0.0993603
HMGU	Mgat1	heterozygote	male	22.25	20.75	3.339	29.75	29.4	22.3618	5.31175	-0.35	2.11768	102.345	92.9435	NaN	NaN	0.145238	NaN	2.02903	0.908649	10	0.0185716	0.0992133
WTSI	Cpt2	heterozygote	male	21	21.4286	3.4	29.6143	28.9429	22.1006	7.05508	-0.671429	2.0457	99.2361	88.4679	412.261	631.041	0.181202	3.94626	2.5777	0.89178	12	0.0132374	0.0977631
RBRC	Apln	hemizygote	male	23	20	3.339	27.2833	27.8833	NaN	NaN	0.6	1.88037	90.659	83.3027	246.532	246.976	0.168476	0.188175	2.35368	0.919539	11	0.0131736	0.097292
HMGU	Eea1	heterozygote	male	21.95	20.6667	3.339	25.1	24.6	NaN	NaN	-0.5	1.99223	96.9663	85	NaN	NaN	NaN	NaN	NaN	0.876884	10.125	0.0181344	0.0968776
TCP	Cplane1	heterozygote	male	26.075	21.45	3.1	28.2888	27.055	22.078	5.43522	-1.23375	1.81989	88.1086	79.3196	894.608	2454.95	NaN	NaN	NaN	0.904578	10.625	0.0128649	0.0950122
MRC Harwell	Spice1	homozygote	male	20.3429	21.9333	NaN	26.1571	25.3671	20.843	4.2184	-0.79	2.09951	101.478	92.1068	1988.13	2925.12	NaN	NaN	NaN	0.908493	10.4286	0.0126016	0.0930677
TCP	Ptprv	homozygote	male	26.4375	21.4042	3.1	27.5475	27.1187	21.3455	5.67493	-0.42875	1.76593	85.1139	78.33	669.259	1920.8	0.124217	NaN	1.61115	0.920501	10.375	0.0125021	0.0923326
BCM	Dnase1l2	heterozygote	male	22.75	22	3.1	21.7	21.8	NaN	NaN	0.1	1.81193	86.8839	81.9646	NaN	NaN	NaN	NaN	NaN	0.94338	10	0.0169261	0.0904222
ICS	Rap1gap2	homozygote	male	21	21	3.145	23.95	24.7375	19.1924	3.33591	0.7875	1.96663	92.7396	94.5294	949.341	1462.5	0.245238	0.15585	3.22701	1.01957	10	0.0121537	0.0897599
WTSI	Rtbdn	homozygote	male	21.5	20.85	3.4	28.275	27.9	23.8736	3.98811	-0.375	2.05354	100.031	87.3314	1573.82	2258.49	0.198095	0.15	2.81802	0.874176	11	0.0120982	0.0893502
WTSI	Ube2d1	homozygote	male	21	20.5714	3.4	28.9714	28.1429	22.5972	6.12109	-0.828571	2.02737	98.1733	88.294	314.729	505.158	0.1522	3.79592	2.16513	0.899804	11.5714	0.0120515	0.0890048
TCP	Rsph9	heterozygote	male	26.575	21.5417	3.1	26.6775	27.345	20.7963	4.78396	0.6675	1.77982	85.52	79.8858	1179.55	2945.2	0.183298	NaN	2.37745	0.932475	10.875	0.0118877	0.0877955
UC Davis	Gabrr2	homozygote	male	24.15	28.7778	3.1	26.645	26.525	20.5011	5.38151	-0.12	1.85132	89.5113	81.1144	NaN	NaN	NaN	NaN	NaN	0.906251	11	0.0163448	0.0873172
WTSI	Pdia4	homozygote	male	21	20.8571	3.4	27.0571	26.4143	NaN	NaN	-0.642857	1.99686	97.2217	85.0899	461.799	689.018	0.152494	3.92653	2.16932	0.875018	11	0.0115471	0.08528
WTSI	Arhgef7	heterozygote	male	21.5	20.475	3.4	29.3125	29.1	22.8541	6.65428	-0.2125	2.06789	101.333	85.792	1452.57	2125.04	0.175833	0.156548	2.50133	0.847454	12	0.0114509	0.0845695
HMGU	Col11a2	heterozygote	male	21.9	20.75	3.339	27.2167	26.15	20.773	4.01039	-1.06667	2.06269	99.8274	90.0317	NaN	NaN	0.133333	NaN	1.86272	0.901077	10.6667	0.0156428	0.0835667
TCP	Bcas1	homozygote	male	26.5875	21.9542	3.1	26.7725	26.0025	21.7713	4.30387	-0.77	1.75131	84.3114	78.0299	819.909	2173.84	NaN	NaN	NaN	0.924762	10.625	0.011244	0.0830411
WTSI	Erp44	heterozygote	male	21.5	21.3333	3.4	27.8857	27.1143	23.9861	3.90593	-0.771429	2.01595	98.1824	85.7934	921.301	1482.85	0.172721	0.132653	2.45706	0.874134	12	0.0112243	0.0828959
UC Davis	Grk5	homozygote	male	24.15	27.3889	3.1	27.805	28.3133	21.4662	5.38854	0.508333	1.88803	90.9564	83.8981	NaN	NaN	NaN	NaN	NaN	0.924201	10.3333	0.0154305	0.0824327
BCM	Slc44a1	homozygote	male	22.75	21.2333	3.1	25.0571	25	18.2681	2.83858	-0.0571429	1.9185	92.515	84.9283	NaN	NaN	NaN	NaN	NaN	0.917811	10	0.0146065	0.0780305
MRC Harwell	Usp22	heterozygote	male	19.8071	20.8	NaN	26.4143	25.34	19.2062	6.42241	-1.07429	2.14089	105.528	86.6166	2207.16	3193.38	NaN	NaN	NaN	0.821757	10.7143	0.0105648	0.0780256
UC Davis	Itsn2	homozygote	male	24.15	24.5083	3.1	27.54	27.745	20.8744	5.34521	0.205	1.87856	90.2363	84.4169	NaN	NaN	NaN	NaN	NaN	0.935832	10	0.0145538	0.0777493
UC Davis	Ccl27a	homozygote	male	24.15	25.5	3.1	27.8525	28.21	21.5	5.34231	0.3575	1.88846	90.5011	85.6125	NaN	NaN	NaN	NaN	NaN	0.946416	11	0.0143166	0.076482
UC Davis	Krit1	heterozygote	male	24.15	25.5	3.1	28.3643	28.5729	19.954	6.75897	0.208571	1.90427	92.7558	80.9961	NaN	NaN	NaN	NaN	NaN	0.874294	11	0.0135338	0.0723
MRC Harwell	Daam2	homozygote	male	20.4438	20.7854	NaN	26.175	25.97	19.3611	5.66994	-0.563333	2.13911	103.101	94.8819	3024.11	4185.59	NaN	NaN	NaN	0.919868	10.875	0.00973715	0.0719127
UC Davis	Il18bp	homozygote	male	24.15	26.2792	3.1	28.2525	28.645	20.9801	6.10424	0.3925	1.90053	92.1757	82.2543	NaN	NaN	NaN	NaN	NaN	0.891838	10.75	0.0134158	0.07167
UC Davis	Pbld2	homozygote	male	24.15	25.7429	3.1	29.3929	29.33	22.0643	6.03736	-0.0628571	1.93745	92.8959	87.6661	NaN	NaN	NaN	NaN	NaN	0.945257	10.8571	0.0133478	0.0713065
MRC Harwell	Slc24a4	homozygote	male	20.525	21.8778	NaN	24.7333	22.92	19.4256	3.99677	-1.28	2.0966	101.446	91.5929	2816.61	3915.84	NaN	NaN	NaN	0.902189	10.3333	0.00949953	0.0701578
UC Davis	Prelp	homozygote	male	24.15	37.9667	3.1	26.045	26.03	19.6602	5.34213	-0.015	1.8147	87.0265	82.0544	425.647	853.007	0.103897	0.0522647	1.34759	0.943356	11	0.00942707	0.0696226
UC Davis	Stra6l	homozygote	male	24.15	28.7381	3.1	28.6914	29.1857	20.7302	7.14768	0.494286	1.91431	91.758	86.7211	NaN	NaN	NaN	NaN	NaN	0.944723	10.4286	0.012962	0.0692456
HMGU	Pard3b	homozygote	male	23.75	20.75	3.339	25.36	25.12	15.933	6.33043	-0.24	1.84065	89.3	79.5619	NaN	NaN	0.12381	NaN	1.72967	0.891164	10	0.0129498	0.0691805
WTSI	Dsg1b	homozygote	male	21.5	20.9167	3.4	29.2833	28.9	24.0098	4.9083	-0.383333	2.03585	98.8932	87.5614	827.871	1345.44	0.173254	0.173016	2.46464	0.885126	11.3333	0.00933177	0.0689188
MRC Harwell	Trim39	homozygote	male	20.1938	21.2167	NaN	25.6125	23.6112	19.7169	5.05692	-2.00125	2.10718	102.404	90.4632	2358.16	3289.9	NaN	NaN	NaN	0.883387	10.25	0.0091527	0.0675963
MRC Harwell	Ctso	homozygote	male	20.2063	20.8313	NaN	25.9875	24.8863	19.6249	5.91938	-1.10125	2.11737	102.748	91.4427	2378.29	3387.9	NaN	NaN	NaN	0.890138	10.875	0.00907864	0.0670493
UC Davis	Crtc3	heterozygote	male	24.15	27.3619	3.1	27.09	27.2043	21.3657	4.64655	0.114286	1.86195	90.1109	81.2747	NaN	NaN	NaN	NaN	NaN	0.901599	11	0.0125413	0.0669978
MRC Harwell	Sema4d	homozygote	male	21.1625	21.7563	NaN	27.925	27.6163	20.8833	5.75937	-0.30875	2.10809	101.638	93.3909	2415.11	3497.59	NaN	NaN	NaN	0.919454	10.125	0.00888619	0.065628
HMGU	Bccip	heterozygote	male	22.1643	20.75	3.339	26.4429	25.8	20.0144	4.11346	-0.642857	2.01123	97.1752	88.3622	NaN	NaN	0.14966	NaN	2.0908	0.909443	10.4286	0.0120145	0.0641837
WTSI	Dppa1	homozygote	male	21.5	20.7857	3.4	29.3	28.9429	24.9394	4.60053	-0.357143	2.05029	99.0556	90.1027	1122.78	1739.99	0.201304	0.162585	2.86367	0.909736	11.7143	0.00859246	0.0634587
HMGU	Farp1	homozygote	male	24.7	20.75	3.339	25.9	25.2429	16.0391	6.4908	-0.657143	1.77524	86.3316	76.0034	NaN	NaN	0.117687	NaN	1.64413	0.880727	10.5714	0.0117348	0.0626896
UC Davis	H1foo	homozygote	male	24.15	26.6333	3.1	28.1457	28.47	20.8186	5.76385	0.324286	1.89538	91.1982	84.625	NaN	NaN	NaN	NaN	NaN	0.928228	10	0.0117312	0.0626703
TCP	Ggnbp2	heterozygote	male	27.4937	21.45	3.1	27.0587	27.0063	20.7713	5.86462	-0.0525	1.7167	82.8179	75.8737	964.191	2457.44	0.14811	NaN	1.92104	0.916975	10.5	0.00839076	0.0619691
UC Davis	Ang6	homozygote	male	24.15	25.9833	3.1	26.1575	26.2937	19.9267	5.18771	0.13625	1.83074	86.0386	89.0412	NaN	NaN	NaN	NaN	NaN	1.06485	10.25	0.0115771	0.0618473
HMGU	Dpp9	heterozygote	male	24.5	20.75	3.339	25.6571	24.7571	NaN	NaN	-0.9	1.7844	87.0153	75.5476	NaN	NaN	0.0945578	NaN	1.32101	0.869037	10.5714	0.0115732	0.061826
WTSI	Crim1	heterozygote	male	21	20.4286	3.4	29.5	28.7429	22.0099	6.76713	-0.757143	2.03396	98.2912	89.297	325.135	507.603	0.15038	3.75782	2.13924	0.910929	11.7143	0.00834576	0.0616368
HMGU	Pef1	homozygote	male	24.3286	20.75	3.339	26.4	25.0429	NaN	NaN	-1.35714	1.8231	88.7857	77.602	NaN	NaN	0.108844	NaN	1.52059	0.872853	10.7143	0.0114334	0.0610795
WTSI	Dcn	homozygote	male	21	20.5714	3.4	30.1429	29.6143	22.1031	7.79777	-0.528571	2.04904	99.208	89.2895	380.956	581.795	0.160612	3.74014	2.28481	0.901007	11.2857	0.00823048	0.0607854
WTSI	4932431P20Rik	homozygote	male	21	20.8571	3.4	30.5286	29.8	21.571	8.37715	-0.728571	2.05723	99.1754	91.1753	389.643	603.75	0.163492	4.00204	2.32577	0.920555	11.5714	0.00815034	0.0601935
WTSI	Dennd4c	heterozygote	male	21	21.2857	3.4	28.8857	28.2143	21.5215	6.48109	-0.671429	2.02519	97.8522	88.9666	387.848	599.083	0.170431	3.84422	2.42448	0.912066	11	0.00798704	0.0589874
HMGU	Sec11c	homozygote	male	22	20.75	3.339	25.625	25.1625	14.7793	8.49679	-0.4625	1.99785	97.4122	84.625	NaN	NaN	0.101786	NaN	1.42198	0.870712	11	0.0110248	0.0588965
MRC Harwell	Fzd3	heterozygote	male	20.15	21.6708	NaN	29.0375	28.2575	21.6054	6.56185	-0.78	2.16177	104.879	93.4416	2024.44	2957.06	NaN	NaN	NaN	0.892321	10.125	0.00787608	0.058168
TCP	Ptpmt1	heterozygote	male	26.6875	21.5417	3.1	28.3125	28.485	20.603	6.87695	0.1725	1.80295	87.0149	79.5574	1244.41	2992.38	0.159407	NaN	2.06758	0.913361	10.125	0.00764597	0.0564685
MRC Harwell	Fgf2	homozygote	male	20.2125	20.9917	NaN	26.475	25.4838	19.9343	4.7168	-0.99125	2.13036	103.304	92.2665	2437.46	3530.85	NaN	NaN	NaN	0.892788	10.875	0.00761428	0.0562345
MRC Harwell	Lyplal1	homozygote	male	20.0143	21	NaN	26.6571	26.1043	NaN	NaN	-0.552857	2.17739	105.877	93.2616	3174.47	4408.94	NaN	NaN	NaN	0.881068	10.4286	0.00757806	0.055967
TCP	Lyst	homozygote	male	26.6375	21.4958	3.1	25.8388	25.3575	20.9455	4.20618	-0.48125	1.74403	84.4089	76.1096	980.988	2629.36	0.123297	NaN	1.59921	0.901477	10.75	0.00747681	0.0552192
WTSI	Adgrb1	heterozygote	male	21.5	20.8	3.4	29.48	28.54	24.5358	4.86172	-0.94	2.06986	101.328	86.2334	1514.03	2200.56	0.169206	0.13619	2.40706	0.850736	11.4	0.00733966	0.0542063
WTSI	Raph1	homozygote	male	21	20.5714	3.4	25.7286	25.1571	20.2609	4.78807	-0.571429	1.96171	94.3842	87.605	358.628	554.177	0.164841	3.81224	2.34497	0.927888	11.1429	0.00711113	0.0525185
HMGU	Gpbp1	heterozygote	male	21.9222	20.75	3.339	26.2667	25.2556	19.3448	5.06982	-1.01111	2.02413	97.7685	89.0344	NaN	NaN	0.148677	NaN	2.07708	0.909126	10.4444	0.00980268	0.0523678
UC Davis	Ncoa1	homozygote	male	24.15	27.6857	3.1	23.2	23.9057	18.731	3.51999	0.705714	1.73284	82.3153	81.1517	NaN	NaN	NaN	NaN	NaN	0.98504	10.7143	0.00959877	0.0512785
TCP	Fmnl2	homozygote	male	26.1286	21.4238	3.1	25.5443	24.9429	20.2954	4.54701	-0.601429	1.74322	84.1093	77.0021	803.792	2058.33	NaN	NaN	NaN	0.915182	10.7143	0.00691869	0.0510973
TCP	Satb2	heterozygote	male	26.975	22.0688	3.1	26.8687	25.6344	21.6474	4.81465	-1.23438	1.75767	85.2049	76.2214	1158.35	2954.53	0.135909	NaN	1.7628	0.894669	10.1875	0.00686017	0.0506651
HMGU	Siva1	homozygote	male	23.3167	20.75	3.339	27.1667	25.7833	17.3321	6.54702	-1.38333	1.93302	94.1726	82.1607	NaN	NaN	0.110317	NaN	1.54118	0.871183	10.5	0.00945084	0.0504882
HMGU	Idi1	heterozygote	male	22.7	20.75	3.339	26.28	25.5	NaN	NaN	-0.78	1.95701	94.8726	84.85	NaN	NaN	0.139524	NaN	1.9492	0.894154	10.1	0.00915502	0.0489079
UC Davis	Fbxo44	homozygote	male	24.15	23.2333	3.1	28	27.9	NaN	NaN	-0.1	1.85381	89.5798	81.409	483.675	970.365	0.0810317	0.0484127	1.05101	0.907995	11	0.00640117	0.0472751
TCP	L3mbtl4	homozygote	male	26.2437	21.725	3.1	28.0963	25.95	22.3504	4.82879	-2.14625	1.77369	86.2917	75.81	523.535	1741.16	NaN	NaN	NaN	0.878331	10.875	0.0061837	0.045669
UC Davis	Prodh	homozygote	male	24.15	27.3133	3.1	26.73	27.114	20.4134	5.14132	0.384	1.84607	88.7391	82.7308	NaN	NaN	NaN	NaN	NaN	0.932548	11	0.00833519	0.0445282
TCP	Ppl	homozygote	male	26.2833	21.7148	3.1	26.27	25.3133	20.9124	5.08468	-0.956667	1.7287	83.1894	77.1425	511.489	1542.79	NaN	NaN	NaN	0.925647	10	0.00599787	0.0442966
TCP	Nxn	heterozygote	male	26.7437	21.4958	3.1	26.2275	26.2312	19.1848	5.97911	0.00375	1.76638	85.2908	77.7971	1344.73	3213.83	0.165896	NaN	2.15173	0.913909	11	0.00594073	0.0438747
TCP	Atp5b	heterozygote	male	27.3	21.2208	3.1	26.3975	26.0587	21.6355	3.99151	-0.33875	1.73528	84.2968	74.6184	1189.7	3087.41	0.122335	NaN	1.58673	0.886089	10.875	0.00575569	0.042508
WTSI	Elmo1	homozygote	male	21.5	20.9286	3.4	28.7143	28.2857	23.6027	4.94098	-0.428571	2.04394	99.5864	86.8383	1290.92	1949.02	0.165873	0.147619	2.35964	0.871625	12	0.00567001	0.0418753
UC Davis	Cd248	homozygote	male	24.15	26.7952	3.1	25.9429	26.3043	19.2994	5.59102	0.361429	1.81976	88.0236	79.596	NaN	NaN	NaN	NaN	NaN	0.904888	10.4286	0.00756156	0.0403953
WTSI	H2-Eb1	homozygote	male	21.5	20.9	3.4	27	26.9	22.6818	4.21553	-0.1	2.02782	98.6666	86.6316	1650.53	2405.87	0.204471	0.173016	2.90872	0.879648	11.5	0.00542284	0.0400498
BCM	Mogs	heterozygote	male	22.75	21.7089	3.1	26.4667	26.0667	18.6772	3.76926	-0.4	1.9571	94.6356	85.7131	NaN	NaN	NaN	NaN	NaN	0.907864	10.4667	0.007487	0.039997
MRC Harwell	Gja8	homozygote	male	19.05	20.25	NaN	25.375	24.955	18.9483	5.03263	-0.42	2.18512	106.131	94.0288	2832.41	3975.24	NaN	NaN	NaN	0.885649	10.375	0.0053487	0.0395023
HMGU	Nxn	heterozygote	male	24.3188	20.75	3.339	25.475	24.8125	NaN	NaN	-0.6625	1.78983	87.1399	76.2768	NaN	NaN	0.111905	NaN	1.56335	0.874166	10.25	0.00731936	0.0391014
UC Davis	Rab32	homozygote	male	24.15	28.1917	3.1	28.2625	29.0375	21.7964	5.24657	0.775	1.8947	90.5224	86.8846	NaN	NaN	NaN	NaN	NaN	0.960868	10.625	0.00725592	0.0387625
MRC Harwell	Irak2	homozygote	male	20.2437	20.65	NaN	26.3775	25.82	19.777	5.34626	-0.5575	2.12586	102.585	93.8542	2478.63	3569.39	NaN	NaN	NaN	0.916197	10.75	0.00519012	0.0383311
UC Davis	Cdan1	heterozygote	male	24.15	28.3333	3.1	28.4125	28.3725	22.5869	4.86794	-0.04	1.89913	91.4252	84.6267	NaN	NaN	NaN	NaN	NaN	0.925302	10.5	0.00683021	0.0364883
UC Davis	Tdo2	heterozygote	male	24.15	26.8458	3.1	28.8538	29.615	22.7826	5.17437	0.76125	1.91335	90.8497	89.7485	NaN	NaN	NaN	NaN	NaN	0.987997	10.625	0.00673025	0.0359543
HMGU	P2rx5	homozygote	male	21.6	20.75	3.339	27.4	26.4	19.9523	4.78121	-1	2.08547	101.786	87.9762	NaN	NaN	0.12381	NaN	1.72967	0.864328	10	0.00667168	0.0356414
MRC Harwell	Smurf1	homozygote	male	20.0857	21.869	NaN	25.7714	24.9125	21.1617	4.28777	-0.8625	2.16456	104.469	95.5069	3432.15	4696.33	NaN	NaN	NaN	0.91341	10.4286	0.00479608	0.0354209
UC Davis	Cracr2a	homozygote	male	24.15	28.5458	3.1	27.9862	28.6438	21.1948	6.07873	0.6575	1.88486	89.6087	88.0154	NaN	NaN	NaN	NaN	NaN	0.981315	10.875	0.00638261	0.0340971
TCP	Rsf1	heterozygote	male	26.6187	21.5875	3.1	25.845	25.5587	20.9985	4.05223	-0.28625	1.74505	84.0555	77.5892	1071.66	2703.59	0.193939	NaN	2.51547	0.921942	10.125	0.00458805	0.0338845
HMGU	Cdkal1	homozygote	male	24.4875	20.75	3.339	24.5	23.3375	NaN	NaN	-1.1625	1.74271	85.003	73.7083	NaN	NaN	0.0946429	NaN	1.3222	0.868073	10.25	0.00633628	0.0338496
UC Davis	Enam	homozygote	male	24.15	28.05	3.1	27.3425	27.4725	21.2791	5.07107	0.13	1.86362	89.3555	84.3273	NaN	NaN	NaN	NaN	NaN	0.944016	10.75	0.00602176	0.0321694
MRC Harwell	Atl2	heterozygote	male	20.3813	21.75	NaN	28.1375	26.7913	20.0952	7.49205	-1.34625	2.16398	104.706	94.5355	2713.7	3899.76	NaN	NaN	NaN	0.903919	11	0.0041855	0.0309115
TCP	Zfp260	heterozygote	male	27.1812	21.8167	3.1	26.09	24.8225	20.5577	4.75496	-1.2675	1.68357	81.5186	73.3427	656.43	1749.13	0.121905	NaN	1.58115	0.90119	10.375	0.00408171	0.0301451
HMGU	Dlec1	homozygote	male	24.3929	20.75	3.339	25	24.7429	NaN	NaN	-0.257143	1.76628	85.2534	77.9082	NaN	NaN	0.140136	NaN	1.95775	0.914233	10.8571	0.00554265	0.0296099
MRC Harwell	Barx2	homozygote	male	19.6667	21	NaN	23.8667	24.13	18.2777	5.20793	0.263333	2.12157	103.152	90.9081	2803.18	3962.87	NaN	NaN	NaN	0.881348	10.6667	0.00399951	0.0295379
MRC Harwell	Glra2	hemizygote	male	20.55	21.6187	NaN	27.725	26.385	19.7203	7.14	-1.34	2.13873	103.399	93.7377	2601.07	3684.68	NaN	NaN	NaN	0.906809	10.75	0.00392576	0.0289933
UC Davis	Fndc3b	heterozygote	male	24.15	25.5	3.1	26.1843	26.9471	19.0151	6.45591	0.762857	1.82538	87.0087	84.4266	NaN	NaN	NaN	NaN	NaN	0.97048	11	0.00535034	0.0285826
WTSI	Adgrb1	homozygote	male	21.5	21.05	3.4	28.6	27.4167	23.5344	5.07297	-1.18333	2.07378	101.825	85.3111	2023.27	2849.32	0.142169	0.097619	2.02244	0.837573	11.6667	0.00381715	0.0281911
TCP	A2m	homozygote	male	26.6071	21.9476	3.1	26.5386	26.3529	20.7209	5.61669	-0.185714	1.75836	85.091	76.7764	1091.27	2710.62	0.141364	NaN	1.83354	0.903506	10.2857	0.0036396	0.0268799
HMGU	Slc44a4	homozygote	male	21.8	20.75	3.339	26.9375	25.575	20.6561	3.72483	-1.3625	2.05162	100.257	86.1071	NaN	NaN	0.111905	NaN	1.56335	0.858932	10.125	0.00502626	0.0268512
WTSI	4921536K21Rik	homozygote	male	21.5	20.8286	3.4	27.9286	27.7143	23.382	3.88707	-0.214286	2.03548	98.187	89.9968	1518.08	2187.28	0.207483	0.163265	2.95157	0.917167	11.1429	0.00340094	0.0251173
TCP	Arhgef6	hemizygote	male	26.25	22	3.1	26.9513	26.145	21.8093	4.63555	-0.80625	1.78522	86.2861	78.3223	1081.62	2717.95	NaN	NaN	NaN	0.907654	10.5	0.00336295	0.0248368
WTSI	Fryl	heterozygote	male	21	20.4286	3.4	28.0143	27.7429	22.3466	5.00364	-0.271429	2.00237	96.5847	88.5509	354.947	562.552	0.173719	3.74626	2.47125	0.916866	11.2857	0.00335386	0.0247696
UC Davis	Rnf31	heterozygote	male	24.15	27.2	3.1	29.9557	30.3686	22.4296	6.43147	0.412857	1.94688	92.8311	89.9358	NaN	NaN	NaN	NaN	NaN	0.970502	10.5714	0.00452629	0.0241803
MRC Harwell	Cib2	homozygote	male	19.1923	20.5385	NaN	26.0215	25.2285	19.996	4.72553	-0.793077	2.24545	107.7	101.474	4000.53	5503.76	NaN	NaN	NaN	0.942526	10.3077	0.00317821	0.0234723
WTSI	Nup85	heterozygote	male	21.5	20.9667	3.4	29.75	29	23.4572	6.05567	-0.75	2.05578	100.717	85.3681	1211.68	1800.57	0.156905	0.125397	2.23206	0.847206	11.5	0.00311137	0.0229787
UC Davis	Arl5c	homozygote	male	24.15	26.0667	3.1	26.865	27.3163	20.3374	5.35608	0.45125	1.84602	88.5039	83.5576	NaN	NaN	NaN	NaN	NaN	0.944163	11	0.00390547	0.0208638
HMGU	Epc2	heterozygote	male	24.5625	20.75	3.339	23.4125	22.9125	14.51	5.65115	-0.5	1.69823	81.8065	75.4866	NaN	NaN	0.12619	NaN	1.76293	0.923548	10.75	0.00358218	0.0191367
TCP	Ttl	heterozygote	male	26.125	21.725	3.1	28.7288	28.16	23.771	4.32612	-0.56875	1.81312	87.2593	80.8825	874.893	2393.53	NaN	NaN	NaN	0.926031	10.375	0.00256145	0.0189174
WTSI	Arpin	homozygote	male	21	20.4286	3.4	31.2429	29.9857	21.8094	9.15627	-1.25714	2.06704	101.073	86.5315	421.676	646.724	0.1261	3.94286	1.79384	0.857405	12	0.00255473	0.0188677
HMGU	Fbp2	homozygote	male	24.53	20.75	3.339	26.66	25.44	16.8929	6.29816	-1.22	1.80603	88.1524	76.169	NaN	NaN	0.104762	NaN	1.46356	0.864472	10.8	0.00325165	0.017371
UC Davis	Mcam	homozygote	male	24.15	28.1143	3.1	28.0857	28.2929	21.4318	4.88948	0.207143	1.88495	90.4571	85.0114	NaN	NaN	NaN	NaN	NaN	0.939702	11	0.00324607	0.0173411
RBRC	Rln3	homozygote	male	23	20.0286	3.339	30.0857	29.9429	20.3969	5.79728	-0.142857	1.92345	92.8466	84.8165	283.833	244.32	0.168299	0.154365	2.3512	0.913688	11.2857	0.00227707	0.0168171
UC Davis	Kcnab3	homozygote	male	24.15	27.625	3.1	29.2213	29.2525	21.6745	6.52996	0.03125	1.92136	92.0053	87.3624	NaN	NaN	NaN	NaN	NaN	0.949319	10.375	0.0028232	0.0150821
UC Davis	Svs2	homozygote	male	24.15	27.2	3.1	25.1714	25.77	19.1582	5.11792	0.598571	1.78992	85.7523	81.2393	NaN	NaN	NaN	NaN	NaN	0.949588	10	0.00273547	0.0146134
MRC Harwell	Timp1	hemizygote	male	20.5938	22	NaN	26.875	25.9537	19.7091	6.38627	-0.92125	2.12617	102.713	93.4683	2720.61	3905.19	NaN	NaN	NaN	0.910028	10	0.00177982	0.0131446
UC Davis	Dcxr	homozygote	male	24.15	28.3333	3.1	28.1014	28.6843	NaN	NaN	0.582857	1.88466	89.9341	86.8113	NaN	NaN	NaN	NaN	NaN	0.964165	10.7143	0.0024406	0.0130382
HMGU	Aqp6	homozygote	male	24.2	20.75	3.339	24.6667	24.0667	NaN	NaN	-0.6	1.76832	85.6111	77.0754	NaN	NaN	0.125397	NaN	1.75184	0.900599	10.5	0.00181056	0.00967237
UC Davis	Ilrun	homozygote	male	24.15	29.1125	3.1	27.615	28.3417	21.6052	4.99753	0.726667	1.86817	88.6141	87.9523	NaN	NaN	NaN	NaN	NaN	0.99286	11	0.00173231	0.00925432
HMGU	Lsm1	heterozygote	male	23.65	20.75	3.339	23.65	23.35	NaN	NaN	-0.3	1.78245	86.4137	77.2679	NaN	NaN	0.12619	NaN	1.76293	0.894194	10	0.00160274	0.00856217
HMGU	Cmpk1	heterozygote	male	22.55	20.75	3.339	26.09	25.22	NaN	NaN	-0.87	1.95609	94.7321	85.1512	NaN	NaN	0.137143	NaN	1.91594	0.896218	10.6	0.00149305	0.00797614
MRC Harwell	Slc16a3	homozygote	male	20.3375	21.5604	NaN	26.6375	24.7212	21.052	4.55752	-1.91625	2.11678	102.083	93.6852	2431.97	3443.61	NaN	NaN	NaN	0.918619	10.375	0.000797604	0.00589062
WTSI	Mrm1	homozygote	male	21.5	21	3.4	30.28	29.62	23.0155	6.9715	-0.66	2.0682	101.081	86.7554	1285.22	1929.46	0.158571	0.120952	2.25577	0.858783	11.6	0.00046061	0.00340178
TCP	Dnajc21	heterozygote	male	26.4625	20.9917	3.1	27.1662	27.0675	20.5364	6.18401	-0.09875	1.79485	86.5387	79.5038	1360.68	3239.55	0.185714	NaN	2.40879	0.920415	11	0.00045152	0.00333465
WTSI	Pced1a	homozygote	male	21	21.2857	3.4	29	28.4	23.2162	5.63218	-0.6	2.02014	97.9426	87.5525	410.874	607.699	0.18085	4.00952	2.5727	0.893348	11.2857	0.000404723	0.00298904
MARC	Fbxo27	homozygote	male	24	21.375	NaN	26.3714	27.2429	19.6507	5.8133	0.871429	1.83949	88.493	82.1852	NaN	NaN	NaN	NaN	NaN	0.929596	13	0.000481177	0.00257054
MRC Harwell	Jag2	heterozygote	male	20.3375	20.9062	NaN	25.1875	24.3412	19.4075	4.78555	-0.84625	2.10865	101.679	93.3638	2858.1	3983.81	NaN	NaN	NaN	0.917506	10.375	0.000300197	0.00221707
HMGU	Myoz1	homozygote	male	24.5	20.75	3.339	23.4714	22.5143	NaN	NaN	-0.957143	1.70214	82.784	72.8486	NaN	NaN	0.106122	NaN	1.48257	0.880027	10.8571	0.000205426	0.00109742
MRC Harwell	Cxcl9	homozygote	male	20.5312	20.5833	NaN	26.6125	25.7862	20.6349	4.82273	-0.82625	2.14522	103.117	96.142	NaN	NaN	NaN	NaN	NaN	0.932685	11	3.36558e-05	0.000179796
MRC Harwell	Agl	heterozygote	male	19.625	19.8	NaN	27.6125	26.0663	21.1723	5.33274	-1.54625	2.18584	105.339	97.005	2675.12	3803.63	NaN	NaN	NaN	0.919829	10	-0.000220182	-0.00162613
MRC Harwell	Gdf15	homozygote	male	19.9	20.7667	NaN	26.0125	25.2475	19.0936	5.17577	-0.765	2.14925	104.922	90.5819	2914.07	4040.06	NaN	NaN	NaN	0.863519	10.375	-0.000289044	-0.0021347
UC Davis	Rgcc	homozygote	male	24.15	30.4042	3.1	28.1325	28.4213	21.1303	6.29678	0.28875	1.8828	90.7998	83.3251	NaN	NaN	NaN	NaN	NaN	0.917161	11	-0.000425016	-0.00227052
MRC Harwell	Usp45	homozygote	male	20.025	21.8167	NaN	24.7	24.84	18.1436	5.47346	0.14	2.09735	100.859	93.8462	2486.22	3511.4	NaN	NaN	NaN	0.930706	10	-0.000338102	-0.00249702
TCP	Sypl	homozygote	male	26.2375	21.0833	3.1	26.875	26.0138	20.2304	5.79644	-0.86125	1.79359	86.7923	78.3275	1158.43	3063.47	0.127805	NaN	1.65768	0.903324	10.5	-0.000466972	-0.00344878
TCP	Slc39a14	heterozygote	male	26.2125	21.2667	3.1	27.1112	26.3975	21.9799	4.39251	-0.71375	1.77316	85.52	78.4458	836.38	2373.47	0.209206	NaN	2.71349	0.917232	10.5	-0.000799614	-0.00590547
HMGU	Aoc1	homozygote	male	24.4	20.75	3.339	28.175	27.7	17.2033	7.55511	-0.475	1.86188	90.1726	81.0402	NaN	NaN	0.12619	NaN	1.76293	0.89877	10.5	-0.00121489	-0.00649016
WTSI	Mbl2	homozygote	male	21	21	3.4	27.5857	27.1714	21.0186	6.10243	-0.414286	1.99003	96.1691	87.3655	377.377	568.37	0.157596	3.77143	2.2419	0.908556	11.2857	-0.000934471	-0.00690144
HMGU	Bach2	homozygote	male	22.5444	20.7407	3.339	17.4556	14.2	12.8768	3.48347	-3.25556	1.67363	82.8426	66.478	NaN	NaN	0.0349206	NaN	0.487854	0.802899	10.6667	-0.00139139	-0.00743307
HMGU	Gsta4	homozygote	male	22.3	20.75	3.339	26.5857	25.5714	16.1814	6.5298	-1.01429	1.99066	96.818	85.1888	NaN	NaN	0.127211	NaN	1.77718	0.879864	10.7143	-0.00152001	-0.00812016
TCP	Fam170a	homozygote	male	26.6438	21.6333	3.1	27.9112	28.1375	22.5456	4.95663	0.22625	1.78082	85.6942	79.4805	1097.48	2785.86	NaN	NaN	NaN	0.928276	10.25	-0.00128364	-0.00948016
UC Davis	Fosb	homozygote	male	24.15	26.5524	3.1	26.2143	26.7086	NaN	NaN	0.494286	1.81904	87.1001	82.7297	NaN	NaN	NaN	NaN	NaN	0.949242	10.7143	-0.00196853	-0.0105163
HMGU	Map3k10	homozygote	male	22.1125	20.75	3.339	24.9	24.1375	NaN	NaN	-0.7625	1.95162	95.0327	83.1146	NaN	NaN	0.122619	NaN	1.71303	0.87875	10.625	-0.00200868	-0.0107308
UC Davis	Il1r2	homozygote	male	24.15	26.6333	3.1	26.3914	26.9543	20.4974	4.51582	0.562857	1.8244	87.0332	84.126	NaN	NaN	NaN	NaN	NaN	0.967103	10	-0.00235571	-0.0125846
UC Davis	Fam173a	homozygote	male	24.15	28.6571	3.1	27.71	28.1414	NaN	NaN	0.431429	1.86661	90.0201	82.6043	NaN	NaN	NaN	NaN	NaN	0.918463	11	-0.0029138	-0.0155661
HMGU	Rilpl1	homozygote	male	24.1643	20.75	3.339	24.2	23.7714	NaN	NaN	-0.428571	1.75151	84.9184	75.9116	NaN	NaN	0.12517	NaN	1.74867	0.892675	10	-0.00293371	-0.0156724
UC Davis	Ripk3	homozygote	male	24.15	38.25	3.1	26.81	26.955	19.659	5.90244	0.145	1.8235	88.1618	79.9105	498.19	1003.55	0.0927153	0.0592844	1.20255	0.905661	11	-0.00220288	-0.0162691
WTSI	Rimbp2	homozygote	male	21	20.7143	3.4	30.8	29.5429	22.6055	8.07178	-1.25714	2.04777	99.3431	88.5325	312.543	488.871	0.118685	3.64966	1.68836	0.891316	11.7143	-0.00222527	-0.0164345
TCP	Spx	homozygote	male	26.125	21.3125	3.1	27.0412	27.0325	22.0734	4.67423	-0.00875	1.7818	85.604	80.0143	1003.37	2556.18	NaN	NaN	NaN	0.934886	10.25	-0.00231463	-0.0170944
HMGU	Cenph	heterozygote	male	24.4125	20.75	3.339	24.75	24.15	15.8922	5.48571	-0.6	1.74766	84.4717	76.6711	NaN	NaN	0.117262	NaN	1.63819	0.907041	10.625	-0.00327277	-0.0174837
UC Davis	Mtnr1b	homozygote	male	24.15	27.5238	3.1	27.7957	28.09	NaN	NaN	0.294286	1.869	89.5382	84.8387	NaN	NaN	NaN	NaN	NaN	0.947788	10.7143	-0.00329978	-0.0176281
WTSI	Crlf3	homozygote	male	21	20.5714	3.4	28.6071	27.7143	22.3319	5.94341	-0.892857	2.00799	97.2949	87.2358	367.901	561.682	0.154016	3.82789	2.19098	0.895696	11.3571	-0.00242834	-0.0179342
UC Davis	Cyp27a1	homozygote	male	24.15	28.05	3.1	26.265	26.6475	20.9297	4.26044	0.3825	1.81911	87.0669	82.8629	NaN	NaN	NaN	NaN	NaN	0.951719	10.5	-0.00354537	-0.0189401
MRC Harwell	Klhl3	homozygote	male	20.4563	21.975	NaN	27.4	25.2888	22.3366	4.38954	-2.11125	2.11513	102.367	92.3139	2328.5	3267.77	NaN	NaN	NaN	0.901866	10.25	-0.0026666	-0.0196939
TCP	Adck1	homozygote	male	26.1875	21.3125	3.1	26.9175	26.5775	21.8799	4.66459	-0.34	1.77667	85.6088	78.8886	955.331	2584.6	NaN	NaN	NaN	0.921464	10.25	-0.00281923	-0.0208211
WTSI	Defb22	homozygote	male	21.5	20.7667	3.4	29.14	28.36	24.4069	4.4803	-0.78	2.04094	99.1691	87.6775	1227.18	1876.94	0.182032	0.120952	2.58951	0.883823	11.2	-0.00282862	-0.0208905
WTSI	Cmtm4	homozygote	male	21.5	20.9389	3.4	28.9833	28.45	23.3862	5.24259	-0.533333	2.05714	100.468	86.5498	1669.39	2389.68	0.200683	0.160317	2.85483	0.861957	11.5	-0.00291739	-0.0215461
UC Davis	Ankfy1	heterozygote	male	24.15	26.3095	3.1	26.482	26.3743	20.5963	5.17481	-0.107714	1.82557	86.5281	86.18	NaN	NaN	NaN	NaN	NaN	0.99722	11	-0.00411801	-0.0219992
WTSI	Adcy9	heterozygote	male	21	21.2857	3.4	31.2286	30.1	22.1892	8.78908	-1.12857	2.05393	99.7186	88.5265	278.404	453.198	0.145601	3.66259	2.07126	0.887979	11.7143	-0.00298773	-0.0220656
UC Davis	Foxo4	hemizygote	male	24.15	27.8714	3.1	26.4143	26.8429	20.712	4.95576	0.428571	1.82272	86.9082	84.2082	NaN	NaN	NaN	NaN	NaN	0.970266	10	-0.00477756	-0.0255227
TCP	Mamld1	hemizygote	male	26.9833	21.2056	3.1	31.0833	28.2	23.1664	7.87007	-2.88333	1.78675	88.1735	71.9267	615.617	1859.83	0.0790476	NaN	1.02528	0.816345	10.8333	-0.00372653	-0.0275219
MRC Harwell	Notch1	heterozygote	male	20.4625	22	NaN	27.4625	NaN	21.7013	5.26055	NaN	2.12591	103.412	90.9198	2503.75	3559.28	NaN	NaN	NaN	0.878273	10.875	-0.00373367	-0.0275747
UC Davis	P3h3	homozygote	male	24.15	28.2625	3.1	26.3525	26.81	19.9322	5.11516	0.4575	1.82022	87.4301	81.81	NaN	NaN	NaN	NaN	NaN	0.936269	10.125	-0.00526513	-0.0281273
UC Davis	N4bp3	homozygote	male	24.15	27.281	3.1	29.0729	29.3757	20.8698	6.98221	0.302857	1.90832	91.6823	85.6965	NaN	NaN	NaN	NaN	NaN	0.935229	11.2857	-0.00539854	-0.02884
UC Davis	Hcrt	homozygote	male	24.15	28.1917	3.1	30.1675	29.6037	NaN	NaN	-0.56375	1.94366	94.319	83.9382	NaN	NaN	NaN	NaN	NaN	0.889924	11	-0.00556199	-0.0297132
UC Davis	Aldoc	homozygote	male	24.15	27.7667	3.1	25.6814	25.6071	19.7683	4.87232	-0.0742857	1.79806	86.4524	80.5046	NaN	NaN	NaN	NaN	NaN	0.92967	10	-0.00566214	-0.0302483
TCP	Myo18a	heterozygote	male	27.05	21.5875	3.1	27.6612	27.065	21.3015	5.95489	-0.59625	1.71106	82.8979	74.3687	647.036	1711.86	0.100784	NaN	1.3072	0.89498	10.5	-0.00428665	-0.0316586
HMGU	Sdhb	heterozygote	male	24.35	20.75	3.339	26.55	25.6875	NaN	NaN	-0.8625	1.80872	87.9747	77.3824	NaN	NaN	0.130357	NaN	1.82114	0.879828	10.5	-0.00597771	-0.0319341
WTSI	Srrm4	heterozygote	male	21.5	21.1857	3.4	30.4714	29.8286	22.2139	8.41171	-0.642857	2.0564	100.316	86.9303	1062.54	1645.21	0.148095	0.114966	2.10674	0.866685	11.8571	-0.00433648	-0.0320266
WTSI	Usp20	homozygote	male	21	21	3.4	27.8714	27.4714	23.1264	4.23567	-0.4	1.99383	96.0555	88.5926	399.571	620.941	0.177392	3.81429	2.52351	0.923112	11.4286	-0.00462241	-0.0341383
UC Davis	Tmub2	homozygote	male	24.15	28.1714	3.1	26.38	27.1286	NaN	NaN	0.748571	1.81987	86.3908	85.437	NaN	NaN	NaN	NaN	NaN	0.987908	10.7143	-0.00651074	-0.0347816
MRC Harwell	Angptl4	homozygote	male	20.5375	21	NaN	27.5625	26.115	21.5044	4.57732	-1.4475	2.1199	102.529	92.7684	2406.33	3480.89	NaN	NaN	NaN	0.905378	10.75	-0.00475854	-0.0351437
MRC Harwell	Prkaa2	homozygote	male	20.4786	21.8143	NaN	26.6143	24.9471	21.3005	4.09956	-1.66714	2.12355	102.802	92.5842	2844.19	3982.28	NaN	NaN	NaN	0.900453	10.5714	-0.00480752	-0.0355054
UC Davis	Rhpn1	homozygote	male	24.15	26.3095	3.1	29.8357	30.3014	22.4428	6.6271	0.465714	1.93178	92.5618	87.6317	NaN	NaN	NaN	NaN	NaN	0.948843	10.1429	-0.00668536	-0.0357145
HMGU	Ccpg1	homozygote	male	22.505	20.75	3.339	28.5	27.46	24.039	4.59202	-1.04	2.0295	98.5036	87.5774	NaN	NaN	0.125714	NaN	1.75628	0.890171	10.6	-0.00712946	-0.038087
MRC Harwell	Uchl1	heterozygote	male	20.4563	21.9187	NaN	26.675	26.17	20.3444	4.95665	-0.505	2.11156	101.757	93.7161	2552.27	3615.65	NaN	NaN	NaN	0.922135	10.25	-0.00534352	-0.039464
TCP	Wnt6	heterozygote	male	26.6687	21.4042	3.1	27.765	27.0375	22.0021	5.15603	-0.7275	1.78211	86.6057	76.5122	1183.66	3039.49	0.14884	NaN	1.93051	0.883938	10.25	-0.00539375	-0.039835
HMGU	Cyp4f14	homozygote	male	23.2625	20.75	3.339	22.6	22.6125	14.2935	4.92001	0.0125	1.77254	85.3214	79.0193	NaN	NaN	0.158929	NaN	2.22029	0.925789	10.375	-0.00757669	-0.0404761
UC Davis	Eps8l1	homozygote	male	24.15	27.3292	3.1	25.27	26.4788	19.1935	5.05167	1.20875	1.78266	84.87	82.8143	NaN	NaN	NaN	NaN	NaN	0.975063	10.625	-0.00772202	-0.0412525
HMGU	Mfn2	heterozygote	male	22.15	20.75	3.339	29.9571	28.7357	22.8373	5.12673	-1.22143	2.1066	102.122	91.3459	NaN	NaN	0.140476	NaN	1.96251	0.893351	10.7143	-0.00782866	-0.0418222
UC Davis	Ppp3r2	homozygote	male	24.15	27.2	3.1	31.2829	31.41	22.3909	7.39123	0.127143	1.97756	95.1499	88.3021	NaN	NaN	NaN	NaN	NaN	0.927724	10.8571	-0.00784424	-0.0419054
HMGU	Ndufa8	heterozygote	male	24.5188	20.75	3.339	25.6	24.775	NaN	NaN	-0.825	1.76108	85.7976	74.8452	NaN	NaN	0.104762	NaN	1.46356	0.870449	10.75	-0.00828956	-0.0442844
HMGU	Mipol1	homozygote	male	24.0071	20.75	3.339	25.0143	24.5143	15.9195	5.82151	-0.5	1.78601	86.4286	77.9847	NaN	NaN	0.127211	NaN	1.77718	0.901997	10.4286	-0.00836549	-0.0446901
RBRC	Hbq1a	homozygote	male	23	20.0476	3.339	25.6	26.3714	18.5514	4.30307	0.771429	1.83025	88.2525	81.0455	292.082	292.361	0.172109	0.160238	2.40443	0.91794	11	-0.00618071	-0.045647
MRC Harwell	Sipa1	homozygote	male	20.4438	21.925	NaN	27.9375	NaN	21.7309	5.09619	NaN	2.13221	103.293	92.7067	2492.08	3525.83	NaN	NaN	NaN	0.896691	10.5	-0.00633795	-0.0468083
UC Davis	Nck1	homozygote	male	24.15	27.8375	3.1	27.1612	27.7413	20.4163	5.96984	0.58	1.84247	87.933	84.8256	NaN	NaN	NaN	NaN	NaN	0.966581	10.5	-0.00924972	-0.0494138
MRC Harwell	Slc24a4	heterozygote	male	20.0944	21.2963	NaN	28.0556	27.595	21.0215	5.25632	-0.671667	2.15834	104.165	95.2462	2569.56	3679.2	NaN	NaN	NaN	0.914907	10.1111	-0.00673851	-0.0497666
TCP	Fcmr	homozygote	male	26.925	21.5875	3.1	26.0237	25.5538	20.8014	3.96366	-0.47	1.69191	81.7511	74.3183	715.491	1933	0.144156	NaN	1.86976	0.908581	10.25	-0.0067747	-0.0500338
TCP	Stbd1	homozygote	male	26.2437	22.0917	3.1	27.2825	26.6262	21.9097	4.82166	-0.65625	1.7704	85.2477	78.8199	887.645	2420.58	NaN	NaN	NaN	0.924086	10.25	-0.00698196	-0.0515645
WTSI	Virma	heterozygote	male	21.5	20.2643	3.4	28.2714	27.6857	23.9262	3.99212	-0.585714	2.02207	98.1351	87.283	1301.75	1937.56	0.185629	0.152381	2.64069	0.888692	11	-0.0072264	-0.0533698
WTSI	Usp11	hemizygote	male	21.5	21.25	3.4	31.575	30.675	22.2104	9.97528	-0.9	2.08653	102.286	86.4231	1287.92	1957.93	0.141548	0.115476	2.0136	0.844773	12	-0.00727505	-0.0537291
TCP	Bok	homozygote	male	26.4357	21.5286	3.1	27.5529	27.3657	21.7421	5.13239	-0.187143	1.76053	85.0076	77.5421	860.947	2300.14	0.177619	NaN	2.30379	0.911885	10	-0.00737799	-0.0544894
HMGU	Tap1	homozygote	male	22.49	20.75	3.339	26.19	24.93	19.545	4.03868	-1.26	1.95268	95.2885	82.4321	NaN	NaN	0.102381	NaN	1.4303	0.864945	10.8	-0.0103196	-0.0551291
TCP	Supt4a	heterozygote	male	26.5625	21.7708	3.1	28.1475	27.7638	22.8456	5.21968	-0.38375	1.76678	85.3473	77.683	822.93	2344.27	0.159545	NaN	2.06937	0.910219	10.375	-0.00755151	-0.0557709
UC Davis	Gpr63	homozygote	male	24.15	27.7667	3.1	28.7657	29.1971	NaN	NaN	0.431429	1.89315	90.5058	86.6096	NaN	NaN	NaN	NaN	NaN	0.956968	11	-0.0106111	-0.0566865
MRC Harwell	Ppm1a	homozygote	male	20.1786	21.5333	NaN	26.2429	24.4686	20.2881	4.44316	-1.77429	2.1211	103.197	90.6494	2763.86	3763.9	NaN	NaN	NaN	0.87823	10	-0.00773604	-0.0571337
UC Davis	Dnase1l2	homozygote	male	24.15	27.9833	3.1	25.1343	25.7271	19.0155	4.85283	0.592857	1.77524	84.8419	81.3124	NaN	NaN	NaN	NaN	NaN	0.958507	10.5	-0.0107343	-0.0573445
UC Davis	Slc6a14	hemizygote	male	24.15	28.6571	3.1	28.3429	28.59	20.4868	6.73961	0.247143	1.87929	91.0218	81.7756	NaN	NaN	NaN	NaN	NaN	0.899855	11	-0.0107568	-0.0574651
MRC Harwell	Lbp	homozygote	male	20.5875	21.35	NaN	28.3	27.7112	21.5205	5.8124	-0.58875	2.11463	103.242	89.088	2160.16	3114.53	NaN	NaN	NaN	0.863348	11	-0.00781353	-0.057706
TCP	Ap4e1	homozygote	male	26.62	21.4867	3.1	26.664	26.774	21.9962	4.79036	0.11	1.82171	88.0791	79.8189	2241.34	4657.12	NaN	NaN	NaN	0.907795	10.6	-0.00804067	-0.0593835
WTSI	Defb30	homozygote	male	21	20.8571	3.4	32.2571	31.4714	23.2868	8.94088	-0.785714	2.07065	100.069	90.89	302.523	505.528	0.173764	3.60612	2.4719	0.909953	11.7143	-0.00808531	-0.0597132
MRC Harwell	Itga2	homozygote	male	19.4187	22.0833	NaN	25.5875	24.3875	19.9344	3.74859	-1.2	2.15564	103.872	95.706	2803.65	3959.5	NaN	NaN	NaN	0.922329	10.375	-0.00812222	-0.0599858
ICS	Parp1	homozygote	male	21	21	3.145	23.9875	24.6125	15.7566	3.22259	0.625	1.94614	93.2784	88.1818	910.79	1438.14	0.22994	0.145179	3.02571	0.944702	11.75	-0.00814224	-0.0601337
TCP	Lrrc2	homozygote	male	27.7875	21.8625	3.1	24.9537	25.2225	19.9352	4.25801	0.26875	1.64686	79.12	73.957	947.94	2534.22	0.169602	NaN	2.19981	0.935558	10.625	-0.0081836	-0.0604392
HMGU	Csnk1g2	homozygote	male	22.375	20.75	3.339	24.625	23.575	15.1966	6.0784	-1.05	1.91025	92.9018	81.7664	NaN	NaN	0.109524	NaN	1.53009	0.882049	10	-0.0118873	-0.0635041
UC Davis	Msantd1	homozygote	male	24.15	27.2	3.1	27.008	27.192	20.5128	5.13607	0.184	1.83481	88.7181	80.3722	NaN	NaN	NaN	NaN	NaN	0.906197	11	-0.0119427	-0.0638003
UC Davis	AU021092	homozygote	male	24.15	24.2333	3.1	29.326	29.31	21.5611	6.74883	-0.016	1.85053	88.8691	83.2324	269.038	614.774	0.0716429	0.0464143	0.929237	0.937419	10.4	-0.00907633	-0.0670323
UC Davis	Ms4a3	homozygote	male	24.15	27.0381	3.1	27.8443	28.6643	21.1106	5.36134	0.82	1.86058	89.4076	83.4848	NaN	NaN	NaN	NaN	NaN	0.933978	10.4286	-0.0132929	-0.0710132
UC Davis	Apbb2	heterozygote	male	24.15	23.2333	3.1	27.4967	27.5667	21.5179	4.18953	0.07	1.82337	87.4908	82.2739	400.619	851.468	0.0953175	0.0556825	1.23631	0.943259	11	-0.00985315	-0.0727694
UC Davis	Tst	homozygote	male	24.15	27.2708	3.1	28.0594	28.6013	20.793	6.08761	0.541875	1.86722	89.8961	83.1799	NaN	NaN	NaN	NaN	NaN	0.926169	10.625	-0.0136267	-0.0727966
UC Davis	Wfdc1	homozygote	male	24.15	29.85	3.1	28.8125	29.5375	20.6312	7.14779	0.725	1.89154	90.3263	86.901	NaN	NaN	NaN	NaN	NaN	0.962084	10.25	-0.0137396	-0.0733994
HMGU	Tmem116	homozygote	male	22.2455	20.75	3.339	26.2091	26.0727	20.3398	3.32843	-0.136364	1.97062	95.237	86.4913	NaN	NaN	0.148918	NaN	2.08044	0.908675	11	-0.014038	-0.074994
UC Davis	Snai2	heterozygote	male	24.15	28.9	3.1	26.7186	27.1929	20.6231	5.04318	0.474286	1.82302	86.9615	84.0847	NaN	NaN	NaN	NaN	NaN	0.967018	11	-0.0143406	-0.0766104
HMGU	Nolc1	homozygote	male	22.5071	20.75	3.339	26.5286	25.7857	20.0217	4.12246	-0.742857	1.95794	94.8461	85.144	NaN	NaN	0.139456	NaN	1.94825	0.897854	11	-0.014572	-0.0778462
WTSI	Trem1	homozygote	male	21.5	21.2667	3.4	28.5	28.1	23.89	5.02376	-0.4	2.03449	98.6634	88.085	1574.61	2239.91	0.181667	0.138095	2.58432	0.891737	11	-0.0105989	-0.0782768
HMGU	Pmel	homozygote	male	22.1786	20.75	3.339	25.8286	25.5286	19.1775	4.05328	-0.3	1.96305	94.7398	86.6276	NaN	NaN	0.154762	NaN	2.16208	0.914253	10.3571	-0.0150173	-0.0802256
HMGU	Cth	homozygote	male	22.8786	20.75	3.339	26.1143	25.2571	16.1217	6.5926	-0.857143	1.91202	92.6803	82.9388	NaN	NaN	0.126531	NaN	1.76768	0.894399	10.4286	-0.0151048	-0.0806927
MRC Harwell	Bbox1	homozygote	male	20.1812	21.525	NaN	27.425	26.46	21.2235	5.30552	-0.965	2.13803	103.457	93.3793	2599.82	3697.32	NaN	NaN	NaN	0.90238	10.375	-0.0109681	-0.0810036
UC Davis	Txndc5	homozygote	male	24.15	29.1083	3.1	26.2525	25.67	19.8458	5.5992	-0.5825	1.80697	87.3944	79.072	NaN	NaN	NaN	NaN	NaN	0.905841	10.625	-0.0152806	-0.0816317
WTSI	Skida1	heterozygote	male	21.5	20.781	3.4	28.7857	27.8857	22.1877	6.14387	-0.9	2.04058	100.004	84.625	1556.89	2268.74	0.154785	0.108163	2.2019	0.846221	11.4286	-0.0111034	-0.0820031
HMGU	Cdk13	heterozygote	male	22.4	20.75	3.339	26.2444	25.1222	19.357	4.14407	-1.12222	1.9569	94.7857	85.1362	NaN	NaN	0.12328	NaN	1.72227	0.898954	10.8889	-0.015604	-0.0833598
MRC Harwell	Atp1a4	homozygote	male	20.2375	21.6667	NaN	24.4875	24.3625	19.1474	3.60447	-0.125	2.0572	98.8277	92.4072	2166.3	3145.19	NaN	NaN	NaN	0.93524	10.5	-0.0113578	-0.083882
WTSI	Pdxk	heterozygote	male	21.5	21.0381	3.4	29.9714	29.2286	23.5201	6.96907	-0.742857	2.06318	100.638	87.2469	1548.17	2270.24	0.153129	0.141497	2.17836	0.866669	12	-0.0114454	-0.0845286
WTSI	Sec1	homozygote	male	21.5	19.8	3.4	28.5143	28.0857	23.5273	4.84327	-0.428571	2.03365	99.2078	85.9636	1503.52	2241.02	0.177528	0.144898	2.52545	0.866174	12	-0.0117563	-0.0868251
MRC Harwell	Itgae	homozygote	male	20.5188	21.9	NaN	25.9625	25.07	18.5435	5.68082	-0.8925	2.0931	101.645	90.125	2669.44	3749.16	NaN	NaN	NaN	0.888306	10.875	-0.0117786	-0.0869899
HMGU	Plekhh1	homozygote	male	22.55	20.6667	3.339	26.0714	25.4714	15.9889	8.28057	-0.6	1.93727	94.3356	82.4966	NaN	NaN	0.127211	NaN	1.77718	0.875718	10.8571	-0.0167274	-0.0893608
HMGU	Spg20	homozygote	male	23.8875	20.75	3.339	24.3375	23.475	NaN	NaN	-0.8625	1.76597	86.1369	74.6949	NaN	NaN	0.104762	NaN	1.46356	0.867203	10.625	-0.0167379	-0.0894171
UC Davis	Tnfrsf17	homozygote	male	24.15	27.0381	3.1	31.9843	32.3671	22.2461	9.68965	0.382857	1.99128	95.326	90.6405	NaN	NaN	NaN	NaN	NaN	0.950842	10.7143	-0.01687	-0.090123
BCM	Thada	homozygote	male	22.75	21	3.1	24.65	25.5625	18.0628	3.9905	0.9125	1.8737	89.0389	87.633	NaN	NaN	NaN	NaN	NaN	0.983516	10.375	-0.016991	-0.0907693
WTSI	2010300C02Rik	homozygote	male	21	21.5714	3.4	29.4857	28.4	23.6787	5.20079	-1.08571	2.01918	97.644	88.41	464.45	676.801	0.172721	3.87075	2.45706	0.904083	11	-0.0125255	-0.0925056
TCP	Rep15	homozygote	male	27	21.6857	3.1	26.4529	26.1286	21.4777	4.21684	-0.324286	1.70668	82.3516	75.3703	908.332	2363.62	NaN	NaN	NaN	0.914707	10	-0.0125302	-0.0925405
UC Davis	Unc119	heterozygote	male	24.15	28.1917	3.1	28.7488	28.6675	21.5801	6.36425	-0.08125	1.88579	91.4724	81.5739	NaN	NaN	NaN	NaN	NaN	0.892554	11	-0.0174244	-0.0930846
UC Davis	Evi2b	homozygote	male	24.15	23.2333	3.1	25.4533	25.2433	19.649	4.7343	-0.21	1.78459	85.5202	80.9155	432.69	942.46	0.0888889	0.0507937	1.15292	0.946453	10.3333	-0.0126321	-0.0932928
WTSI	Dctn1	heterozygote	male	21.5	20.1143	3.4	30.2857	29.9286	23.1652	7.33901	-0.357143	2.06464	100.39	88.4467	1515.99	2182.82	0.185873	0.131973	2.64416	0.880998	11.5714	-0.0127584	-0.0942255
MRC Harwell	Gpr137b	homozygote	male	20.4312	21.8646	NaN	27.875	25.4675	21.5802	6.09078	-2.4075	2.1308	103.698	90.9589	2629.17	3683.62	NaN	NaN	NaN	0.877387	10.125	-0.0131395	-0.0970407
UC Davis	Msantd1	homozygote	male	24.15	36.8333	3.1	25.36	25.5233	19.0326	5.18533	0.163333	1.78244	86.4724	77.0583	448.646	951.823	0.107424	0.0377778	1.39334	0.891309	11	-0.0133319	-0.0984616
UC Davis	Fbln7	homozygote	male	24.15	27.3417	3.1	27.6512	28.2338	19.9653	6.98639	0.5825	1.84895	88.8908	82.8132	NaN	NaN	NaN	NaN	NaN	0.932472	10.25	-0.0186627	-0.0996997
HMGU	Cyp4b1	homozygote	male	22.925	20.75	3.339	26.8375	25.1875	NaN	NaN	-1.65	1.92782	94.7113	79.1161	NaN	NaN	0.0880952	NaN	1.23072	0.836095	11	-0.0187678	-0.100261
MRC Harwell	Adam23	heterozygote	male	20.8938	21.25	NaN	26.9	26.65	19.7037	5.02622	-0.25	2.08919	101.018	91.5164	2649.41	3740.06	NaN	NaN	NaN	0.907223	10.875	-0.0135851	-0.100331
UC Davis	D130043K22Rik	homozygote	male	24.15	29.4667	3.1	27.7286	27.7286	NaN	NaN	-5.07531e-16	1.85116	89.1423	82.3947	NaN	NaN	NaN	NaN	NaN	0.923475	10.4286	-0.018959	-0.101283
MRC Harwell	Rfx7	heterozygote	male	20.75	21.4524	NaN	26.5429	25.9243	20.2993	4.85787	-0.618571	2.07202	99.9203	91.7166	2229.17	3269.34	NaN	NaN	NaN	0.917793	11	-0.013751	-0.101557
BCM	Gpr39	homozygote	male	22.75	21.2333	3.1	25.7833	25.9167	18.0184	4.10551	0.133333	1.90843	92.1579	84.0256	NaN	NaN	NaN	NaN	NaN	0.912123	10	-0.0190138	-0.101576
MRC Harwell	Itch	homozygote	male	20.3438	21.6042	NaN	23.425	22.38	18.5036	3.73746	-1.045	2.04892	99.0459	89.8395	2561.27	3686.22	NaN	NaN	NaN	0.90643	10.25	-0.0138883	-0.10257
UC Davis	Taar6	homozygote	male	24.15	27.7667	3.1	30.3829	30.3229	22.1377	6.6835	-0.06	1.93667	92.978	87.2061	NaN	NaN	NaN	NaN	NaN	0.938346	11	-0.0195377	-0.104374
HMGU	Ccdc151	heterozygote	male	22.25	20.6667	3.339	25.66	24.4	15.5776	8.26971	-1.26	1.94677	95.1302	81.719	NaN	NaN	0.0933333	NaN	1.3039	0.860583	11	-0.0196834	-0.105153
TCP	Coa5	heterozygote	male	26.9071	21.581	3.1	27.1043	26.9929	20.637	5.33412	-0.111429	1.73255	83.647	76.3448	1014.33	2633.08	0.14487	NaN	1.87902	0.913971	10.1429	-0.0142892	-0.105531
UC Davis	Snx27	heterozygote	male	24.15	26.6333	3.1	30.8712	30.5312	21.8832	8.08899	-0.34	1.95212	94.4605	85.2613	NaN	NaN	NaN	NaN	NaN	0.90259	10.875	-0.0199326	-0.106484
HMGU	Rbl1	heterozygote	male	22.1833	20.75	3.339	29.9	29.0667	21.9351	4.23809	-0.833333	2.08935	101.141	91.1131	NaN	NaN	0.139683	NaN	1.95142	0.900985	10.3333	-0.0203567	-0.108749
HMGU	Gsk3a	homozygote	male	22.325	20.75	3.339	27.1875	25.675	22.5028	2.71921	-1.5125	1.98901	96.5655	85.7321	NaN	NaN	0.116667	NaN	1.62988	0.888103	10.375	-0.0205381	-0.109719
WTSI	Gimap6	homozygote	male	21.5	20.9286	3.4	31.7714	30.7429	21.1519	10.2242	-1.02857	2.0848	101.442	89.0581	1343.39	2012.99	0.147937	0.106803	2.10449	0.879801	11.5714	-0.0148664	-0.109794
TCP	Cdk4	heterozygote	male	26.7625	21.1292	3.1	25.3712	25.01	20.3324	4.99385	-0.36125	1.72663	83.2092	76.6252	1266.43	3180.76	0.178633	NaN	2.31694	0.921613	10.75	-0.0150463	-0.111123
BCM	Rfx8	homozygote	male	22.75	21.2333	3.1	24.1286	23.9	17.6144	4.02053	-0.228571	1.85297	89.5034	81.4998	NaN	NaN	NaN	NaN	NaN	0.890474	10.5714	-0.0208019	-0.111128
UC Davis	Clps	heterozygote	male	24.15	25.5	3.1	28.2486	28.2843	20.5615	6.38407	0.0357143	1.86613	89.4426	84.5585	NaN	NaN	NaN	NaN	NaN	0.945753	10	-0.0208602	-0.111439
WTSI	Dhx33	heterozygote	male	21	21.2857	3.4	28.7714	27.5429	21.8863	6.31215	-1.22857	2.0018	97.0303	86.8413	424.294	651.856	0.157868	3.63878	2.24577	0.896582	11.2857	-0.0151825	-0.112128
UC Davis	Cldn18	heterozygote	male	24.15	29.4667	3.1	27.255	26.89	NaN	NaN	-0.365	1.83342	88.6908	80.169	NaN	NaN	NaN	NaN	NaN	0.90358	11	-0.0213441	-0.114024
UC Davis	Lst1	homozygote	male	24.15	28.1714	3.1	28.9029	28.8771	22.7154	4.76111	-0.0257143	1.88663	91.3971	82.0255	NaN	NaN	NaN	NaN	NaN	0.895391	11	-0.0215752	-0.115259
UC Davis	Calhm1	homozygote	male	24.15	23.2333	3.1	26.55	26.54	19.5128	6.1282	-0.01	1.79735	86.2679	81.0089	384.738	808.524	0.104762	0.0699524	1.3588	0.939039	10	-0.0159877	-0.118075
WTSI	Amz2	homozygote	male	21.5	21.95	3.4	29.6667	28.2833	21.9111	7.72718	-1.38333	2.03369	99.5032	84.9207	1155.12	1766.28	0.134365	0.084127	1.91142	0.853099	11.5	-0.0160721	-0.118699
UC Davis	Ndufc2	homozygote	male	24.15	28.6875	3.1	27.4363	28.1988	20.9944	5.71605	0.7625	1.838	88.0392	83.4806	NaN	NaN	NaN	NaN	NaN	0.948493	10.625	-0.0226419	-0.120957
ICS	Bnc2	heterozygote	male	21	21	3.145	26.7625	26.3625	20.3923	4.26806	-0.4	1.98149	94.8153	90.3433	734.949	1175.68	0.216607	0.0727976	2.85026	0.950886	10	-0.0164604	-0.121567
HMGU	Rph3a	homozygote	male	24.6	20.75	3.339	24.875	24.2	NaN	NaN	-0.675	1.71604	83.2946	74.0327	NaN	NaN	0.115476	NaN	1.61325	0.887797	10	-0.0228179	-0.121898
UC Davis	Fgf15	heterozygote	male	24.15	27.54	3.1	27.212	26.982	20.2068	5.81101	-0.23	1.83043	87.5861	83.4593	NaN	NaN	NaN	NaN	NaN	0.953258	10.2	-0.0229391	-0.122545
MRC Harwell	Rexo2	heterozygote	male	20.825	20.5833	NaN	26.175	24.8275	19.4784	5.20818	-1.3475	2.08249	100.911	90.4489	NaN	NaN	NaN	NaN	NaN	0.894798	11	-0.0232375	-0.124139
BCM	Tas2r131	homozygote	male	22.75	21.1667	3.1	25.2571	25.3	17.8094	3.74	0.0428571	1.88708	90.5129	85.2736	NaN	NaN	NaN	NaN	NaN	0.937248	10	-0.0232972	-0.124458
UC Davis	Ptma	heterozygote	male	24.15	27.3619	3.1	29.82	30.3	20.6693	7.74786	0.48	1.91465	91.9285	86.1867	NaN	NaN	NaN	NaN	NaN	0.938279	11	-0.0233034	-0.124491
RBRC	Trpc3	heterozygote	male	23	20.1143	3.339	27.0714	27.3857	19.7807	4.59954	0.314286	1.85097	89.6693	80.4751	373.218	375.109	0.163197	0.171111	2.27993	0.897504	11	-0.0169663	-0.125303
UC Davis	Slc3a1	homozygote	male	24.15	30.1952	3.1	23.1629	23.8714	NaN	NaN	0.708571	1.69851	81.5669	76.4006	NaN	NaN	NaN	NaN	NaN	0.937139	10.5714	-0.0235241	-0.12567
MRC Harwell	Mcu	heterozygote	male	20.5938	20.9667	NaN	25.5875	25.545	18.6613	5.69299	-0.0425	2.06526	99.665	91.165	2426.84	3447.81	NaN	NaN	NaN	0.915595	11	-0.0170678	-0.126052
WTSI	Nadk2	heterozygote	male	21	20.5714	3.4	28.4143	27.7857	21.7032	6.0975	-0.628571	1.99954	96.8605	86.9575	570.609	831.929	0.167256	3.59592	2.37932	0.89913	11.5714	-0.0173341	-0.128019
TCP	Dync1li1	heterozygote	male	26.15	21.8167	3.1	28.0625	27.4975	22.756	6.48474	-0.565	1.79512	86.2642	80.5403	1147.26	2823.91	NaN	NaN	NaN	0.933985	10.625	-0.0174578	-0.128933
HMGU	Dnase1l2	homozygote	male	24.0437	20.75	3.339	20.5875	19.7375	NaN	NaN	-0.85	1.62315	78.9658	69.3824	NaN	NaN	0.108333	NaN	1.51346	0.878137	10.625	-0.0244991	-0.130879
UC Davis	Prkcq	homozygote	male	24.15	23.2333	3.1	27.4433	28.2133	21.5205	4.72965	0.77	1.81582	86.9703	82.4966	455.873	891.96	0.0968254	0.0610317	1.25586	0.94852	11	-0.0179011	-0.132207
WTSI	Cenpl	heterozygote	male	21	21	3.4	31.1857	30.1857	NaN	NaN	-1	2.03852	99.658	85.4115	282.481	462.435	0.125374	4.15714	1.78352	0.857393	11.7143	-0.0179229	-0.132367
UC Davis	Atp12a	homozygote	male	24.15	28.05	3.1	28.9025	29.29	NaN	NaN	0.3875	1.88326	90.313	85.1592	NaN	NaN	NaN	NaN	NaN	0.942992	11	-0.0249378	-0.133222
UC Davis	Otoa	homozygote	male	24.15	27.281	3.1	27.2057	27.83	21.2882	5.18348	0.624286	1.8281	86.7688	85.8683	NaN	NaN	NaN	NaN	NaN	0.990179	11	-0.0250649	-0.133901
MRC Harwell	Il17rd	homozygote	male	19.375	21.5333	NaN	25.7937	24.69	19.7731	3.72495	-1.10375	2.12346	103.287	90.836	2227.36	3204.17	NaN	NaN	NaN	0.882964	10.25	-0.0181564	-0.134092
UC Davis	1700037H04Rik	homozygote	male	24.15	27.2	3.1	25.4657	25.5014	NaN	NaN	0.0357143	1.77159	84.9595	80.1039	NaN	NaN	NaN	NaN	NaN	0.943314	10.7143	-0.0251363	-0.134283
WTSI	Plscr2	homozygote	male	21	21.1429	3.4	30.5	29.4286	23.4422	6.87207	-1.07143	2.02749	98.3542	87.6734	336.519	532.766	0.16873	3.87075	2.40029	0.892376	11.1429	-0.0183717	-0.135682
WTSI	Glt8d2	homozygote	male	21.5	20.981	3.4	29.4714	28.5714	23.904	5.43984	-0.9	2.03874	100.011	84.204	1416.81	2063.52	0.164762	0.136054	2.34384	0.842517	11.5714	-0.018446	-0.136231
UC Davis	Padi2	heterozygote	male	24.15	27.1619	3.1	29.25	29.1714	22.5477	5.54073	-0.0785714	1.89394	91.0891	84.7029	NaN	NaN	NaN	NaN	NaN	0.929265	11	-0.0255242	-0.136355
TCP	Eps8l3	homozygote	male	26.96	21.4867	3.1	26.538	26.046	21.3411	4.76557	-0.492	1.7374	83.7225	77.1222	1438.56	3252.88	0.15881	NaN	2.05982	0.92093	11	-0.0190609	-0.140773
MRC Harwell	Hipk2	heterozygote	male	19.05	20.6833	NaN	26.75	24.9337	19.7233	5.32735	-1.81625	2.18162	107.407	88.723	2768.99	3828.01	NaN	NaN	NaN	0.82628	11	-0.0191416	-0.141368
BCM	Eml2	homozygote	male	22.75	21.2333	3.1	26.4143	26.0571	18.334	3.80705	-0.357143	1.92135	92.8527	84.3411	NaN	NaN	NaN	NaN	NaN	0.909325	10	-0.0265615	-0.141897
UC Davis	Prr15l	homozygote	male	24.15	27.4429	3.1	26.2486	26.8829	20.1194	4.87594	0.634286	1.79541	86.0294	81.4391	NaN	NaN	NaN	NaN	NaN	0.948721	10.5714	-0.0267076	-0.142677
HMGU	Usp12	homozygote	male	24.4	20.75	3.339	23.94	23.5	NaN	NaN	-0.44	1.69899	82.2929	73.9167	NaN	NaN	0.12	NaN	1.67645	0.899292	11	-0.0267501	-0.142904
MRC Harwell	Serpinb12	homozygote	male	19.9	21.8444	NaN	25.8667	25.5933	20.1231	4.82317	-0.273333	2.11983	102.075	94.3731	2709.79	3840.99	NaN	NaN	NaN	0.924677	11	-0.0193918	-0.143216
UC Davis	Sec61b	homozygote	male	24.15	25.5	3.1	25.4	25.8886	18.1906	6.18182	0.488571	1.76769	84.4129	81.2083	NaN	NaN	NaN	NaN	NaN	0.962147	10.8571	-0.0269069	-0.143742
UC Davis	Peli1	heterozygote	male	24.15	23.0444	3.1	27.8083	27.98	19.8632	6.70014	0.171667	1.84548	89.6219	79.4588	NaN	NaN	NaN	NaN	NaN	0.888347	10	-0.0272252	-0.145442
HMGU	Arhgap26	homozygote	male	21.75	20.6667	3.339	25.0778	24.2111	NaN	NaN	-0.866667	1.96324	95.1728	85.127	NaN	NaN	0.12963	NaN	1.81097	0.894113	10.6667	-0.0273319	-0.146012
MRC Harwell	Aldh3a1	homozygote	male	20.2688	21.2042	NaN	24.9875	23.5587	18.5198	5.88415	-1.42875	2.06961	100.318	89.7805	2489.7	3486.08	NaN	NaN	NaN	0.894699	10.25	-0.0197723	-0.146027
UC Davis	Slc25a3	heterozygote	male	24.15	27.2	3.1	25.7371	26.2814	19.8993	5.29301	0.544286	1.77808	85.377	80.0191	NaN	NaN	NaN	NaN	NaN	0.937559	10	-0.0274482	-0.146634
UC Davis	Hacl1	homozygote	male	24.15	28.175	3.1	29.1462	28.7112	21.2433	6.76513	-0.435	1.88862	91.4074	82.4191	NaN	NaN	NaN	NaN	NaN	0.901054	10.875	-0.0274784	-0.146795
MRC Harwell	Furin	heterozygote	male	19.55	21.5542	NaN	26.475	25.3263	20.9559	4.07211	-1.14875	2.15913	104.756	93.3108	2904.11	4093.86	NaN	NaN	NaN	0.891137	11	-0.0198786	-0.146811
UC Davis	Panx3	homozygote	male	24.15	23.2333	3.1	27.1	28.54	NaN	NaN	1.44	1.79915	85.2834	84.9051	318.881	683.548	0.11	0.0433333	1.42674	0.995565	10	-0.0200995	-0.148442
WTSI	Frrs1	heterozygote	male	21.5	20.9429	3.4	32.0857	30.2	23.3174	9.19366	-1.88571	2.10693	103.23	87.4651	1807.33	2579.25	0.102517	0.0979592	1.45837	0.848736	12	-0.0201274	-0.148649
HMGU	Myl2	heterozygote	male	22.18	20.75	3.339	26.23	25.94	17.9499	6.6584	-0.29	1.96313	94.9631	85.8488	NaN	NaN	0.140952	NaN	1.96916	0.904516	10	-0.0278361	-0.148706
BCM	Ly6e	heterozygote	male	22.75	18	3.1	25.7857	25.9714	NaN	NaN	0.185714	1.8994	90.9517	86.3716	NaN	NaN	NaN	NaN	NaN	0.949456	11	-0.0281243	-0.150246
TCP	Ercc3	heterozygote	male	27.0813	21.9542	3.1	27.0263	26.6887	21.5848	4.67055	-0.3375	1.68108	81.522	72.794	607.676	1718.69	0.143182	NaN	1.85713	0.893238	10.125	-0.0206116	-0.152225
UC Davis	AU021092	homozygote	male	24.15	26.9167	3.1	28.3175	28.7525	21.6579	5.45347	0.435	1.86069	89.0503	84.7811	NaN	NaN	NaN	NaN	NaN	0.953581	11	-0.0285354	-0.152441
TCP	Aire	heterozygote	male	26.3786	21.319	3.1	28.3614	27.9571	22.6134	4.70469	-0.404286	1.80368	87.0595	79.5546	1306.47	3310.52	NaN	NaN	NaN	0.91222	10.5714	-0.0209015	-0.154366
UC Davis	Ap2s1	heterozygote	male	24.15	27.0867	3.1	27.01	27.172	20.2945	5.88365	0.162	1.81756	86.9582	82.9169	NaN	NaN	NaN	NaN	NaN	0.952926	10	-0.0292512	-0.156266
TCP	Psph	heterozygote	male	26.2286	21.4238	3.1	27.4186	27.4714	20.2761	6.3625	0.0528571	1.76759	85.3856	77.7206	1060.34	2632.54	0.157016	NaN	2.03656	0.914755	10.4286	-0.0212057	-0.156613
MRC Harwell	Hace1	heterozygote	male	19.525	21.8167	NaN	25.3625	24.22	18.4732	5.45501	-1.1425	2.1276	102.845	93.3077	2712.06	3827.52	NaN	NaN	NaN	0.907525	10.375	-0.0212328	-0.156813
WTSI	Traf6	heterozygote	male	21.5	21.2222	3.4	29.6333	28.7833	22.8078	6.79387	-0.85	2.0313	99.307	85.1016	1199.28	1859.06	0.145952	0.114286	2.07626	0.856936	11.8333	-0.0213204	-0.157459
TCP	Scrib	heterozygote	male	26.7	21.3125	3.1	29.3062	28.4775	21.4812	7.22497	-0.82875	1.7861	86.7036	77.024	1082.84	2823.03	0.134545	NaN	1.74511	0.89282	10.25	-0.0213466	-0.157653
UC Davis	Npr3	homozygote	male	24.15	27.2	3.1	25.35	25.57	19.7329	5.52682	0.22	1.7633	83.6006	83.1538	NaN	NaN	NaN	NaN	NaN	0.994655	10	-0.0296771	-0.158541
UC Davis	Lor	homozygote	male	24.15	30.4111	3.1	26.74	26.8017	20.7891	4.55726	0.0616667	1.80835	87.4527	79.1627	NaN	NaN	NaN	NaN	NaN	0.904932	11	-0.0297123	-0.158729
HMGU	Hunk	homozygote	male	22.425	20.75	3.339	25.4875	24.7625	15.6162	6.29755	-0.725	1.91609	92.7113	83.7083	NaN	NaN	0.166071	NaN	2.32008	0.903705	10.375	-0.0297156	-0.158746
WTSI	Man2b2	homozygote	male	21	21	3.4	28.8857	28.3429	23.2288	6.07317	-0.542857	2.00015	96.8865	86.9958	491.565	718.968	0.176599	3.62653	2.51222	0.898716	11.1429	-0.0215705	-0.159307
UC Davis	Ch25h	homozygote	male	24.15	27.6286	3.1	27.3957	27.3086	20.5679	6.05558	-0.0871429	1.82947	88.0335	81.6581	NaN	NaN	NaN	NaN	NaN	0.929271	10.1429	-0.0298545	-0.159489
UC Davis	Lef1	heterozygote	male	24.15	25.7429	3.1	25.2486	25.7986	18.8911	5.75086	0.55	1.75967	83.2823	83.5031	NaN	NaN	NaN	NaN	NaN	1.00211	10.7143	-0.0300192	-0.160369
WTSI	Selenok	homozygote	male	21	20.2857	3.4	28.2429	28.0286	22.0214	6.64369	-0.214286	1.99187	96.4773	86.6654	561.895	834.007	0.180624	3.72245	2.56948	0.898134	11.4286	-0.0217738	-0.160808
UC Davis	Hirip3	homozygote	male	24.15	38.5333	3.1	26.76	29.27	19.9724	5.73357	2.51	1.81423	86.9538	82.2126	761.5	1312.54	0.108623	0.0555942	1.40889	0.945176	10	-0.0221387	-0.163503
TCP	Acvr2a	heterozygote	male	27.2687	21.2208	3.1	28.5862	28.6675	21.6975	6.18213	0.08125	1.73022	83.3763	76.8042	1078.81	2528.97	0.157452	NaN	2.04222	0.921155	10.25	-0.0221681	-0.16372
MRC Harwell	F2	heterozygote	male	20.6	21.875	NaN	28.2875	27.6913	20.9092	5.65198	-0.59625	2.10367	101.875	91.5902	2202.84	3230.9	NaN	NaN	NaN	0.899372	11	-0.0222531	-0.164348
TCP	Thoc6	heterozygote	male	26.6438	21.4042	3.1	27.54	27.0975	22.7557	4.40094	-0.4425	1.7217	82.7847	77.0716	744.257	1966.84	NaN	NaN	NaN	0.930113	10.75	-0.0224026	-0.165452
HMGU	Alkbh8	homozygote	male	22.09	20.75	3.339	25.22	24.16	19.7532	3.07113	-1.06	1.93497	93.8833	83.6119	NaN	NaN	0.118095	NaN	1.64983	0.890971	10.6	-0.0309743	-0.165471
WTSI	Dynll1	heterozygote	male	21.5	20.5067	3.4	29.14	28.86	21.9135	7.32866	-0.28	2.03282	99.1578	85.9634	1487.79	2186.15	0.166786	0.151429	2.37263	0.867712	11	-0.0225885	-0.166825
UC Davis	Oxgr1	homozygote	male	24.15	26.3905	3.1	29.0757	29.0071	20.4005	7.87016	-0.0685714	1.88256	90.905	82.8996	NaN	NaN	NaN	NaN	NaN	0.911283	10.2857	-0.0312521	-0.166955
WTSI	Trim65	homozygote	male	21	21	3.4	30.3286	29.7429	21.4042	8.72981	-0.585714	2.01701	97.6829	87.8014	291.968	459.435	0.171043	3.8415	2.43319	0.89924	11.1429	-0.022779	-0.168232
MRC Harwell	P2rx6	homozygote	male	19.8	22.2	NaN	27.7429	26.7457	19.5328	6.49263	-0.997143	2.13441	104.859	87.6	2275.4	3225.96	NaN	NaN	NaN	0.836108	10.8571	-0.0231559	-0.171016
MRC Harwell	Sdhc	heterozygote	male	20.2625	22.1	NaN	26.8	26.695	19.758	6.57198	-0.105	2.10699	101.337	94.2263	2589.01	3634.51	NaN	NaN	NaN	0.930779	11	-0.0232852	-0.17197
TCP	Minar1	homozygote	male	26.6313	21.5875	3.1	27.6062	27.5162	22.1078	5.58496	-0.09	1.76549	85.0419	78.492	1230.25	3106.01	NaN	NaN	NaN	0.923144	10.125	-0.0234445	-0.173147
HMGU	Atp5g2	heterozygote	male	23.825	20.75	3.339	24.8375	24.275	15.1693	6.16817	-0.5625	1.77183	85.814	77.1116	NaN	NaN	0.122024	NaN	1.70472	0.898801	10.875	-0.0324723	-0.173473
WTSI	Nme4	homozygote	male	21.5	21.1048	3.4	29.8143	29.0571	22.9421	6.32223	-0.757143	2.03235	98.3784	88.6376	1232.77	1852.7	0.178016	0.127211	2.53238	0.901411	12	-0.0235213	-0.173714
HMGU	Sgip1	heterozygote	male	24.2	20.75	3.339	25.2375	24.675	15.6416	6.27096	-0.5625	1.75238	85.0387	75.6711	NaN	NaN	0.124405	NaN	1.73798	0.888559	10.5	-0.032641	-0.174375
TCP	Washc3	heterozygote	male	26.4187	21.8167	3.1	27.56	27.965	20.2081	6.59299	0.405	1.76984	84.761	80.4324	1216.45	2952.85	NaN	NaN	NaN	0.949672	10.625	-0.0236817	-0.174899
BCM	Ubp1	heterozygote	male	22.75	21.2333	3.1	24.4429	24.8	16.9063	3.8979	0.357143	1.85123	87.8035	87.1797	NaN	NaN	NaN	NaN	NaN	0.99376	11	-0.0327414	-0.174911
WTSI	Gdpd2	hemizygote	male	21	20.1429	3.4	31.0714	30.4571	21.956	8.98726	-0.614286	2.0382	98.6572	88.9097	435.291	666.613	0.156712	3.87279	2.22932	0.902191	12	-0.0237203	-0.175184
UC Davis	Fbxl22	homozygote	male	24.15	28.1067	3.1	27.015	27.575	20.5299	5.25444	0.56	1.81386	86.5243	83.6622	NaN	NaN	NaN	NaN	NaN	0.966856	10.3	-0.0331179	-0.176922
WTSI	Mrap2	homozygote	male	21.5	21.0111	3.4	41.3333	39.8667	25.0024	17.5208	-1.46667	2.24704	110.732	91.0117	1086.21	1664.88	0.147937	0.0984127	2.10449	0.821937	11.6667	-0.0240261	-0.177442
WTSI	D630023F18Rik	homozygote	male	21	20.4286	3.4	29.9571	29.0857	21.6469	8.33051	-0.871429	2.01796	98.8512	83.8436	473.586	709.571	0.144637	4.38503	2.05755	0.848917	11	-0.0240815	-0.177852
UC Davis	Spast	homozygote	male	24.15	26.6333	3.1	26.93	26.41	20.49	5.71876	-0.52	1.8109	86.7732	82.1348	NaN	NaN	NaN	NaN	NaN	0.946545	10	-0.0333249	-0.178028
TCP	Nabp2	heterozygote	male	26.35	21.45	3.1	26.98	26.7263	21.2987	5.58433	-0.25375	1.74262	84.2348	76.4255	961.906	2443.68	0.135747	NaN	1.76069	0.907641	10.375	-0.0241746	-0.178539
TCP	Chst14	heterozygote	male	26.1313	22.0458	3.1	26.2338	25.6863	21.2206	4.24356	-0.5475	1.73113	83.5226	76.4805	797.842	2215.84	NaN	NaN	NaN	0.914871	10.75	-0.0242615	-0.179181
WTSI	Ell2	homozygote	male	21	21	3.4	26.9571	26.0429	20.574	6.15939	-0.914286	1.95373	94.7194	84.6875	349.084	546.136	0.185578	4.1585	2.63996	0.894397	12	-0.024265	-0.179207
WTSI	Abraxas2	homozygote	male	21.5	20.75	3.4	29.8833	29.1167	22.0464	7.67285	-0.766667	2.07321	101.829	85.1731	2077.29	2925.71	0.146429	0.127778	2.08303	0.836244	11	-0.0243897	-0.180127
ICS	Krt8	heterozygote	male	21	21	3.145	27.08	27.82	20.8315	2.64968	0.74	1.97551	95.1	88.0364	645.709	1066.3	0.240476	0.163619	3.16435	0.922972	11	-0.0244492	-0.180567
UC Davis	Fosb	heterozygote	male	24.15	27.2	3.1	25.9	26.32	NaN	NaN	0.42	1.7767	85.4095	79.6046	NaN	NaN	NaN	NaN	NaN	0.932034	11	-0.0341134	-0.182241
WTSI	Tmem254b	homozygote	male	21.5	21.1499	3.4	28.6286	27.8286	22.5025	6.41862	-0.8	2.01658	97.8906	86.9694	1401.84	2075.72	0.159977	0.127891	2.27577	0.888349	11.8571	-0.0248025	-0.183176
UC Davis	Pde6a	homozygote	male	24.15	23.2333	3.1	29.3	29.0257	20.9164	7.63127	-0.274286	1.84342	88.4227	83.2859	411.653	857.48	0.106156	0.0518776	1.37689	0.94302	10.7143	-0.0248258	-0.183348
MRC Harwell	Flnb	heterozygote	male	20.5286	21.0071	NaN	26.6714	26.26	19.2779	5.78446	-0.411429	2.07906	100.702	90.4524	2354.58	3375.88	NaN	NaN	NaN	0.898572	10.7143	-0.0249253	-0.184083
UC Davis	Spock2	homozygote	male	24.15	27.2708	3.1	26.5575	26.7425	20.6388	4.31257	0.185	1.79762	86.1299	81.5579	NaN	NaN	NaN	NaN	NaN	0.946776	10.25	-0.0345206	-0.184416
WTSI	Rtbdn	heterozygote	male	21.5	21.0476	3.4	27.9571	27.6	22.6115	4.97693	-0.357143	2.01656	98.5959	84.4507	1683.8	2423.62	0.175085	0.139456	2.49069	0.856606	11.1429	-0.0249712	-0.184422
WTSI	Spink10	homozygote	male	21.5	20.9429	3.4	29.9857	29.1429	23.5843	6.02534	-0.842857	2.05134	100.361	85.6778	1582.13	2309.22	0.162404	0.119048	2.31029	0.851832	11.5714	-0.0250265	-0.18483
WTSI	Atxn10	heterozygote	male	21	21	3.4	28.8857	28.0143	21.6094	6.60471	-0.871429	1.99121	96.659	85.8745	379.455	584.5	0.160227	3.72721	2.27932	0.888643	11.4286	-0.0254483	-0.187946
UC Davis	Hmx2	homozygote	male	24.15	28.05	3.1	25.6913	26.0388	19.9924	4.85857	0.3475	1.76858	84.8257	79.9309	NaN	NaN	NaN	NaN	NaN	0.943072	10.375	-0.035459	-0.189429
TCP	Prss27	homozygote	male	26.875	21.6333	3.1	29.0125	27.8762	22.8051	5.71124	-1.13625	1.76788	85.6882	76.7051	1108.21	2850.6	NaN	NaN	NaN	0.895182	10.875	-0.0256761	-0.189628
UC Davis	Padi6	homozygote	male	24.15	21	3.1	25.88	26.11	19.126	5.54318	0.23	1.76319	83.6948	82.7948	239.845	507.507	0.0616901	0.0346479	0.800146	0.989247	10	-0.0258907	-0.191213
ICS	Tnfrsf9	heterozygote	male	21	21	3.145	26.35	27.8	14.3307	6.79613	1.45	1.97155	93.9773	91.1818	901.528	1374	0.282619	0.17381	3.71889	0.970361	12	-0.0259068	-0.191332
HMGU	Avpi1	homozygote	male	24.1611	20.75	3.339	24.0889	22.5444	NaN	NaN	-1.54444	1.71523	83.9352	71.5741	NaN	NaN	0.0888889	NaN	1.24181	0.852862	10.6667	-0.0358865	-0.191713
MRC Harwell	Zdhhc24	homozygote	male	18.9833	20.8778	NaN	24.705	24.4833	18.3971	5.19025	-0.05	2.15073	104.534	92.2846	2984.21	4144.39	NaN	NaN	NaN	0.883019	11	-0.0260101	-0.192095
UC Davis	Syne3	homozygote	male	24.15	26.6333	3.1	29.6386	30.0957	21.268	7.03192	0.457143	1.89585	90.7059	86.4795	NaN	NaN	NaN	NaN	NaN	0.953733	11	-0.0362242	-0.193517
MRC Harwell	Dpm2	heterozygote	male	20.925	21.2167	NaN	28.425	27.5375	21.6156	5.50989	-0.8875	2.10649	101.881	92.182	2644.78	3797.88	NaN	NaN	NaN	0.905395	10.5	-0.026234	-0.193748
WTSI	Sult1c1	homozygote	male	21	21.7143	3.4	30.9286	30.2857	22.0147	8.76267	-0.642857	2.0275	98.1758	88.3117	333.274	525.637	0.170272	3.95238	2.42222	0.899612	11	-0.0263612	-0.194688
UC Davis	Snx22	homozygote	male	24.15	26.775	3.1	26.8087	26.9337	19.4038	6.80607	0.125	1.80345	86.4305	81.7467	NaN	NaN	NaN	NaN	NaN	0.945725	11	-0.0368399	-0.196806
UC Davis	Il33	homozygote	male	24.15	26.0667	3.1	30.2543	30.2357	21.1768	7.89109	-0.0185714	1.91518	92.0418	85.8963	NaN	NaN	NaN	NaN	NaN	0.932523	10	-0.0368648	-0.196939
UC Davis	Gpr182	homozygote	male	24.15	33.3389	3.1	27.7633	28.0467	20.1783	6.56184	0.283333	1.83436	86.8484	86.9383	NaN	NaN	NaN	NaN	NaN	1.04357	11	-0.0368862	-0.197053
WTSI	Fads3	homozygote	male	21	20.8571	3.4	29.7857	28.9571	21.2022	8.61299	-0.828571	2.00428	97.1567	86.9248	332.504	506.226	0.149612	3.80272	2.12832	0.894737	11.2857	-0.0267994	-0.197924
UC Davis	Thbs1	homozygote	male	24.15	27.7667	3.1	26.1412	26.4875	20.5526	4.78636	0.34625	1.78147	85.8594	79.0319	NaN	NaN	NaN	NaN	NaN	0.919498	10.5	-0.0371691	-0.198565
MRC Harwell	Pcnx3	homozygote	male	20	21.1944	NaN	22.3333	22.3483	NaN	NaN	0.015	2.03461	98.3325	89.2905	2612.14	3732.17	NaN	NaN	NaN	0.909081	10.5	-0.0270477	-0.199758
WTSI	Acot5	homozygote	male	21.5	20.8571	3.4	28.0143	28.1	22.5535	5.14961	0.0857143	2.0088	97.1895	87.7859	1549.16	2243.87	0.189563	0.178231	2.69665	0.902925	11.8571	-0.0270635	-0.199875
BCM	Gpr15	homozygote	male	22.75	21.2333	3.1	24.7429	24.5571	17.6938	3.16283	-0.185714	1.85602	89.6349	81.6898	NaN	NaN	NaN	NaN	NaN	0.911025	10	-0.0376767	-0.201276
TCP	Galc	heterozygote	male	26.4	21.2667	3.1	27.0463	25.695	20.5295	5.32412	-1.35125	1.74186	85.0092	73.503	990.046	2541.96	0.123754	NaN	1.60514	0.863695	10.875	-0.0272624	-0.201343
HMGU	Emc3	heterozygote	male	21.7	20.75	3.339	28.9375	27.5625	22.3647	3.80794	-1.375	2.08231	101.106	89.7173	NaN	NaN	0.136905	NaN	1.91261	0.887324	11	-0.0377515	-0.201676
MARC	Usp46	homozygote	male	24	33.5952	NaN	25.6857	25.9143	21.4065	3.48022	0.228571	1.77884	85.9185	78.2541	NaN	NaN	NaN	NaN	NaN	0.914634	11	-0.0379207	-0.20258
HMGU	Itm2c	heterozygote	male	24.425	20.75	3.339	27.4375	26.35	16.8819	7.19351	-1.0875	1.79896	87.4911	76.997	NaN	NaN	0.10119	NaN	1.41367	0.881123	10.625	-0.0380704	-0.203379
HMGU	Zfp119a	homozygote	male	24.2625	20.75	3.339	24.8125	24.125	15.4105	6.29473	-0.6875	1.72753	84.0342	73.8795	NaN	NaN	0.113095	NaN	1.57998	0.878547	10.125	-0.0383343	-0.204789
UC Davis	Crygc	homozygote	male	24.15	27.9286	3.1	28.4843	28.6629	20.9206	6.72848	0.178571	1.85617	89.0814	83.6946	NaN	NaN	NaN	NaN	NaN	0.940709	10.7143	-0.0384597	-0.205459
TCP	Hpse	homozygote	male	27.35	21.8167	3.1	26.12	25.8267	20.1798	4.69791	-0.293333	1.66177	80.3178	72.9121	858.581	2239.44	NaN	NaN	NaN	0.908188	10	-0.0278224	-0.20548
TCP	Sgsh	homozygote	male	27.5938	21.2208	3.1	29.9988	29.86	24.3017	4.3957	-0.13875	1.7245	82.7018	77.9733	843	2261.65	NaN	NaN	NaN	0.942267	10.25	-0.027871	-0.205838
MRC Harwell	Plac9a	homozygote	male	20.3313	21.8167	NaN	27.35	25.7325	19.636	7.80001	-1.6175	2.09313	101.978	88.9471	2144.66	3204.72	NaN	NaN	NaN	0.871125	10.375	-0.0279442	-0.206379
UC Davis	A830005F24Rik	homozygote	male	24.15	28.0095	3.1	27.0257	27.2386	19.4469	6.66528	0.212857	1.80867	87.3344	79.6545	NaN	NaN	NaN	NaN	NaN	0.912366	10.5714	-0.0386536	-0.206495
UC Davis	Rp9	homozygote	male	24.15	23.2333	3.1	25.7075	26.0425	19.3894	5.21047	0.335	1.77209	84.7644	80.9072	421.863	887.53	0.106131	0.0542143	1.37656	0.956164	10.5	-0.0279687	-0.20656
TCP	Gpc2	heterozygote	male	26.3875	21.45	3.1	27.96	27.7888	20.5877	6.68321	-0.17125	1.76403	85.5969	76.1978	1080.29	2671.06	0.133114	NaN	1.72654	0.889366	10	-0.0282556	-0.208679
TCP	1700019D03Rik	homozygote	male	25.4125	21.4042	3.1	28.9312	28.51	23.0746	4.97519	-0.42125	1.83436	88.6462	80.5311	1063.79	2672.47	NaN	NaN	NaN	0.910189	10.625	-0.0283084	-0.209069
HMGU	Pdcd5	heterozygote	male	22	20.75	3.339	29.325	27.775	22.0751	4.57496	-1.55	2.06761	101.113	86.5134	NaN	NaN	0.11131	NaN	1.55504	0.855519	10	-0.0392191	-0.209516
UC Davis	Hddc3	homozygote	male	24.15	27.6571	3.1	26.3314	26.0286	19.7449	5.61148	-0.302857	1.78556	85.5818	80.9052	NaN	NaN	NaN	NaN	NaN	0.944866	10.5714	-0.039246	-0.209659
HMGU	Cpa2	homozygote	male	23.9857	20.75	3.339	25.1286	23.9	NaN	NaN	-1.22857	1.76062	85.7194	75.0255	NaN	NaN	0.101361	NaN	1.41604	0.874754	10.7143	-0.0393028	-0.209963
UC Davis	Olfr392	homozygote	male	24.15	26.5625	3.1	25.9387	26.4525	18.1078	7.14979	0.51375	1.77263	84.7179	81.1886	NaN	NaN	NaN	NaN	NaN	0.958295	10.375	-0.0394437	-0.210716
WTSI	Ralgapb	heterozygote	male	21.5	20.7024	3.4	26.3429	25.4143	21.4271	5.00681	-0.928571	1.96819	95.5143	84.98	1399.83	2062.63	0.168095	0.12449	2.39126	0.890555	11.2857	-0.0285945	-0.211182
BCM	Phf24	homozygote	male	22.75	21.2333	3.1	25.0571	25.1571	17.9894	3.5548	0.1	1.86424	89.0904	85.4067	NaN	NaN	NaN	NaN	NaN	0.960281	10.1429	-0.0396502	-0.211819
WTSI	Cdk14	homozygote	male	21.5	21.319	3.4	27.2	26.7714	21.4156	5.24288	-0.428571	1.97509	96.027	84.6441	1163.26	1810.72	0.185153	0.148299	2.63391	0.882745	11.4286	-0.0287487	-0.212321
MRC Harwell	Ube2u	homozygote	male	20.0813	20.9	NaN	25.95	24.3925	19.4653	5.44526	-1.5575	2.12838	103.53	91.0336	3267.89	4528.86	NaN	NaN	NaN	0.878903	10.625	-0.0287661	-0.212449
WTSI	Klk5	homozygote	male	21	20.4286	3.4	27.9571	27.4714	21.9863	5.54842	-0.485714	1.964	95.3317	84.7248	265.134	429.69	0.153458	3.85102	2.18303	0.888776	11.2857	-0.0289071	-0.213491
WTSI	Rsad1	homozygote	male	21.5	20.8667	3.4	29.75	29.1833	23.6503	6.21107	-0.566667	2.03429	98.5077	88.5966	1409.58	2081.88	0.184683	0.153968	2.62722	0.899216	11.8333	-0.0289683	-0.213942
UC Davis	4930539E08Rik	homozygote	male	24.15	28.981	3.1	27.1657	27.2329	20.8278	5.08797	0.0671429	1.81181	87.1862	80.8613	NaN	NaN	NaN	NaN	NaN	0.926636	11	-0.0400544	-0.213978
UC Davis	1110032A03Rik	homozygote	male	24.15	28.0095	3.1	28.9843	29.4829	NaN	NaN	0.498571	1.87048	89.2697	86.1154	NaN	NaN	NaN	NaN	NaN	0.965166	10.7143	-0.0403696	-0.215662
UC Davis	Atp2b1	heterozygote	male	24.15	27.4429	3.1	26.3657	27.0186	20.1616	5.27157	0.652857	1.78549	86.1018	79.0381	NaN	NaN	NaN	NaN	NaN	0.91884	10.5714	-0.0404242	-0.215954
HMGU	Ptpn23	heterozygote	male	24.7	20.75	3.339	25.3	23.9	15.3691	6.52154	-1.4	1.70361	83.4031	70.9592	NaN	NaN	0.0918367	NaN	1.28299	0.8473	10.4286	-0.0404364	-0.216019
TCP	Vps25	heterozygote	male	26.4437	21.3125	3.1	26.7937	26.7675	19.3097	6.91107	-0.02625	1.71863	82.9194	75.9282	817.028	2168.69	0.154802	NaN	2.00785	0.914751	10	-0.0292573	-0.216077
UC Davis	Cd22	homozygote	male	24.15	26.775	3.1	26.3888	25.9	19.5118	6.36223	-0.48875	1.78622	85.6652	80.7501	NaN	NaN	NaN	NaN	NaN	0.943747	10.75	-0.0404488	-0.216085
TCP	Cecr2	heterozygote	male	26.9062	21.6333	3.1	29.9325	28.655	23.0636	6.07296	-1.2775	1.74498	84.8993	74.5687	680.97	1912.39	NaN	NaN	NaN	0.878727	10.25	-0.0293412	-0.216696
UC Davis	Asb15	homozygote	male	24.15	27.6857	3.1	29.61	29.6586	NaN	NaN	0.0485714	1.89044	90.791	85.0087	NaN	NaN	NaN	NaN	NaN	0.937052	10.7143	-0.0407008	-0.217432
ICS	Cstb	homozygote	male	21	20.75	3.145	22.9833	23.6	17.9328	3.17204	0.616667	1.90343	90.2281	89.8211	892.799	1385.77	0.240159	0.110905	3.16017	0.996499	10.5833	-0.0295054	-0.217909
WTSI	Serpina3c	homozygote	male	21.5	20.2976	3.4	28.7143	28.2857	23.6783	5.03727	-0.428571	2.00784	97.5451	86.3102	1254.24	1925.44	0.189093	0.153741	2.68996	0.884795	11.4286	-0.0295456	-0.218206
UC Davis	Rbp4	homozygote	male	24.15	28.2704	3.1	29.5111	29.8778	21.8709	6.14274	0.366667	1.88708	90.5284	85.2168	NaN	NaN	NaN	NaN	NaN	0.941881	11	-0.0408601	-0.218282
HMGU	Exph5	homozygote	male	21.92	20.6667	3.339	24.08	23.32	14.4839	7.60113	-0.76	1.90266	92.5079	81.5302	NaN	NaN	0.108571	NaN	1.51678	0.882929	10.9	-0.0409337	-0.218676
MRC Harwell	Ints12	heterozygote	male	20.3625	21.1625	NaN	24.9375	24.915	18.5808	4.49889	-0.0225	2.03766	98.4182	89.6434	2071.34	3057.93	NaN	NaN	NaN	0.911389	10.75	-0.0296824	-0.219216
WTSI	Sec22b	heterozygote	male	21.5	21.1381	3.4	28.5429	27.8143	21.9038	6.37385	-0.728571	2.00435	98.0984	83.5844	1324.85	1929.82	0.166395	0.111565	2.36706	0.852042	11	-0.0298934	-0.220775
WTSI	Dnmt3a	homozygote	male	21.5	21.1048	3.4	27.6	27.3714	23.1312	4.36345	-0.228571	1.98209	95.3223	88.6671	1208.68	1821.99	0.202993	0.14966	2.8877	0.930402	11.5714	-0.029896	-0.220794
UC Davis	Calhm2	homozygote	male	24.15	27.2	3.1	28.1843	27.8629	NaN	NaN	-0.321429	1.84339	88.8207	81.8603	NaN	NaN	NaN	NaN	NaN	0.922424	11	-0.0415156	-0.221785
UC Davis	Eif4ebp3	homozygote	male	24.15	28.1722	3.1	30.4833	29.585	21.2685	8.3059	-0.898333	1.8552	89.4696	82.1006	326.148	705.415	0.0779514	0.0308674	1.01106	0.916186	10.8333	-0.0301562	-0.222716
WTSI	3830417A13Rik	hemizygote	male	21.5	20.6861	3.4	27.6	26.65	22.4773	5.24701	-0.95	1.97884	96.9129	82.2958	1158.07	1742.48	0.149333	0.119048	2.12436	0.848258	11.3333	-0.0301563	-0.222716
MRC Harwell	Atf3	homozygote	male	20.3687	20.8062	NaN	25.05	24.365	18.5715	5.62193	-0.685	2.056	98.6475	92.7902	2470.38	3510.67	NaN	NaN	NaN	0.94056	10.5	-0.0302267	-0.223236
WTSI	Tceal9	hemizygote	male	21.5	20.9444	3.4	32.3167	31.0167	23.1304	8.8795	-1.3	2.08364	102.268	85.8616	1427.89	2111.71	0.143016	0.0960317	2.03449	0.840164	12	-0.0302624	-0.223499
UC Davis	Gdf2	homozygote	male	24.15	28.4467	3.1	30.462	30.94	21.0263	8.5029	0.478	1.91682	92.4051	84.957	NaN	NaN	NaN	NaN	NaN	0.919787	10.8	-0.0419583	-0.224149
UC Davis	Bfsp1	homozygote	male	24.15	26.4714	3.1	26.2657	27.6071	20.599	4.76048	1.34143	1.7806	84.5642	83.4604	NaN	NaN	NaN	NaN	NaN	0.993135	10.8571	-0.0420702	-0.224747
UC Davis	Ccdc92	homozygote	male	24.15	28.1444	3.1	27.8167	28.825	21.5866	5.31892	1.00833	1.83076	86.8682	86.0903	NaN	NaN	NaN	NaN	NaN	0.989824	11	-0.0422141	-0.225516
UC Davis	Cdh26	homozygote	male	24.15	28.6167	3.1	27.978	28.151	NaN	NaN	0.173	1.83588	88.2993	82.0965	NaN	NaN	NaN	NaN	NaN	0.930596	11	-0.0423305	-0.226138
WTSI	Zfp408	homozygote	male	21	20.8571	3.4	31.0429	30.2429	22.229	8.58927	-0.8	2.02531	98.1829	87.8145	320.696	525.395	0.161088	3.67415	2.29158	0.894859	11.4286	-0.0307402	-0.227029
UC Davis	Tmem114	homozygote	male	24.15	27.7667	3.1	28.005	28.8	20.3386	7.04875	0.795	1.83657	88.1013	82.9516	NaN	NaN	NaN	NaN	NaN	0.942906	10.6667	-0.0425142	-0.227119
MRC Harwell	Grm3	homozygote	male	20.525	21.4271	NaN	26.3	25.1662	19.6764	5.27248	-1.13375	2.06208	99.693	90.3796	2272.73	3265.39	NaN	NaN	NaN	0.905912	10.375	-0.0307581	-0.227161
MRC Harwell	Klf7	heterozygote	male	19.5357	21.4643	NaN	25.2143	24.1986	19.437	4.85167	-1.01571	2.16132	105.116	92.4983	3754.18	5069.6	NaN	NaN	NaN	0.88043	11	-0.0308585	-0.227903
WTSI	Cpsf3	heterozygote	male	21	21.5333	3.4	28.6733	28.1867	23.3215	5.70812	-0.486667	1.97911	96.4451	84.0217	334.933	520.62	0.168651	3.86317	2.39916	0.871593	11.3333	-0.0310451	-0.229281
UC Davis	Pdk1	homozygote	male	24.15	26.7952	3.1	26.5614	27.4286	19.9517	5.37874	0.867143	1.78933	86.07	79.9805	NaN	NaN	NaN	NaN	NaN	0.929088	10.8571	-0.0429359	-0.229372
TCP	Rsad1	homozygote	male	26.31	22	3.1	25.384	25.794	20.3011	4.4662	0.41	1.73129	83.8951	75.1873	1247.22	3090.07	0.137455	NaN	1.78284	0.896702	10.4	-0.0311653	-0.230168
UC Davis	Pigm	heterozygote	male	24.15	28.1917	3.1	27.0712	27.2213	21.2322	4.42764	0.15	1.80565	86.89	80.5849	NaN	NaN	NaN	NaN	NaN	0.928447	10.75	-0.0431531	-0.230532
TCP	B3galt6	heterozygote	male	26.075	21.725	3.1	28.4013	27.69	22.1883	5.78737	-0.71125	1.7821	85.8912	79.0556	967.125	2565.41	NaN	NaN	NaN	0.919528	10.875	-0.0312514	-0.230804
UC Davis	Atg9b	homozygote	male	24.15	26.4917	3.1	26.5075	26.6225	20.1697	5.12044	0.115	1.78726	85.6421	81.0575	NaN	NaN	NaN	NaN	NaN	0.947856	10.75	-0.0432588	-0.231097
MRC Harwell	Pawr	homozygote	male	19.8167	21.6	NaN	28.9667	27.17	21.6182	7.14792	-1.79667	2.18627	106	94.7422	3001.73	4215.94	NaN	NaN	NaN	0.893901	10.6667	-0.0312961	-0.231134
UC Davis	Adra2a	homozygote	male	24.15	26.7952	3.1	29.2986	29.2729	NaN	NaN	-0.0257143	1.87736	89.7931	85.7381	NaN	NaN	NaN	NaN	NaN	0.954112	10.1429	-0.0436793	-0.233343
RBRC	Adcyap1r1	heterozygote	male	23	20.0476	3.339	27.4429	27.9286	19.9328	4.83678	0.485714	1.84195	89.1221	80.4748	332.367	334.429	0.162976	0.16932	2.27684	0.902371	11.5714	-0.0316248	-0.233561
MRC Harwell	Grm6	homozygote	male	19.2812	21.2687	NaN	25.1	24.5162	18.5986	5.09355	-0.58375	2.17087	105.214	94.2149	3665.36	5045.04	NaN	NaN	NaN	0.894575	10.625	-0.0316425	-0.233693
HMGU	Ubash3a	homozygote	male	23.3556	20.75	3.339	28.1556	26.4333	16.9469	7.71457	-1.72222	1.90836	93.3254	79.8492	NaN	NaN	0.0962963	NaN	1.3453	0.854018	10	-0.0439446	-0.234761
WTSI	Actr6	heterozygote	male	21.5	20.9667	3.4	31.1	30.3	23.1399	7.98247	-0.8	2.04427	100.026	85.3424	1132.23	1735.32	0.17619	0.129252	2.50642	0.854235	12	-0.0319904	-0.236262
TCP	Crispld2	heterozygote	male	26.5312	21.4042	3.1	27.1575	27.2188	19.7849	6.81244	0.06125	1.73562	83.5496	77.3554	1031.55	2630.78	0.163961	NaN	2.12664	0.926338	11	-0.0320494	-0.236697
HMGU	Nbas	heterozygote	male	22.3	20.75	3.339	22.7333	22.7667	13.9159	5.54637	0.0333333	1.82289	87.8135	81.0198	NaN	NaN	0.153968	NaN	2.15099	0.922794	10	-0.0443394	-0.23687
WTSI	Ift80	homozygote	male	21.5	20.84	3.4	29.92	29.56	NaN	NaN	-0.36	2.02663	98.1326	88.277	1258.09	1877.97	0.178095	0.15619	2.53351	0.899229	11.6	-0.0322335	-0.238057
UC Davis	Cep83	heterozygote	male	24.15	26.1476	3.1	27.2214	27.9229	19.583	6.21235	0.701429	1.8091	86.3866	83.1235	NaN	NaN	NaN	NaN	NaN	0.962562	10.5714	-0.0445773	-0.238141
UC Davis	Dusp13	homozygote	male	24.15	28.1714	3.1	28.4114	28.5757	20.9783	5.96181	0.164286	1.84751	88.9937	82.1354	NaN	NaN	NaN	NaN	NaN	0.923697	10	-0.0447577	-0.239104
UC Davis	Gopc	heterozygote	male	24.15	25.8238	3.1	27.7457	26.6757	NaN	NaN	-1.07	1.82568	87.6536	82.1918	NaN	NaN	NaN	NaN	NaN	0.940463	10.4286	-0.0450022	-0.24041
MRC Harwell	Elmod2	heterozygote	male	20.4062	20.9667	NaN	27.375	26.3775	20.2511	6.79017	-0.9975	2.11426	102.25	92.5433	2858.11	3982.39	NaN	NaN	NaN	0.904515	10.375	-0.0326059	-0.240808
MRC Harwell	Pkn1	homozygote	male	20.1687	21.5542	NaN	27.5625	26.1462	20.4221	6.74165	-1.41625	2.10664	101.985	91.842	2335.91	3354.99	NaN	NaN	NaN	0.900354	10.875	-0.0327872	-0.242147
HMGU	Sdc2	homozygote	male	24.37	20.75	3.339	29.56	28.64	NaN	NaN	-0.92	1.86524	90.5333	80.481	NaN	NaN	0.13619	NaN	1.90263	0.889186	10.8	-0.0453567	-0.242304
UC Davis	Tmem106b	homozygote	male	24.15	25.075	3.1	25.0938	26.1575	19.4498	4.53775	1.06375	1.73923	82.7277	81.0634	NaN	NaN	NaN	NaN	NaN	0.980168	10.75	-0.0454326	-0.24271
UC Davis	Tfap4	homozygote	male	24.15	27.0611	3.1	24.425	24.7167	20.1936	3.9001	0.291667	1.71723	82.6557	76.5649	NaN	NaN	NaN	NaN	NaN	0.924012	10.6667	-0.0457463	-0.244386
UC Davis	Il21	homozygote	male	24.15	27.1292	3.1	30.765	30.395	22.2081	7.24741	-0.37	1.92284	92.7742	84.9419	NaN	NaN	NaN	NaN	NaN	0.916443	11	-0.0457701	-0.244512
MRC Harwell	Rhbdl3	heterozygote	male	19.25	21.5333	NaN	27.0875	25.7862	21.5752	4.11691	-1.30125	2.15539	104.018	95.1304	2584.61	3611.02	NaN	NaN	NaN	0.915384	10	-0.0331315	-0.244689
MRC Harwell	Efcab11	homozygote	male	20.5063	21.25	NaN	26.125	25.2563	20.0558	4.57791	-0.86875	2.08929	100.918	91.8947	2967.64	4116.5	NaN	NaN	NaN	0.911448	10.5	-0.0332136	-0.245296
UC Davis	Prss16	homozygote	male	24.15	26.0667	3.1	28.6186	28.7543	NaN	NaN	0.135714	1.85304	88.307	85.7765	NaN	NaN	NaN	NaN	NaN	0.971757	10	-0.0459499	-0.245473
MRC Harwell	Plpp3	heterozygote	male	19.9812	21.125	NaN	25.6	23.88	NaN	NaN	-1.72	2.06798	99.8202	91.1995	2136.61	3085.24	NaN	NaN	NaN	0.912841	10.75	-0.0333485	-0.246292
MRC Harwell	Mfsd8	homozygote	male	20.4438	21.2375	NaN	26.975	26.115	21.0219	4.97243	-0.86	2.09483	101.327	91.6349	2638.9	3746.04	NaN	NaN	NaN	0.90606	10	-0.0334325	-0.246912
UC Davis	Epn3	homozygote	male	24.15	28.4952	3.1	32.0371	32.5957	22.3175	8.42766	0.558571	1.96355	94.1979	88.6674	NaN	NaN	NaN	NaN	NaN	0.941074	10.5714	-0.0463161	-0.24743
WTSI	Sag	homozygote	male	21.5	20.8432	3.4	29.3571	28.5	24.5077	4.83024	-0.857143	2.04519	99.7571	86.5002	1898.48	2701.57	0.168095	0.138776	2.39126	0.86562	11.7143	-0.0338213	-0.249784
UC Davis	Casr	heterozygote	male	24.15	25.5	3.1	25.6337	25.45	19.2152	5.57816	-0.18375	1.75531	84.2869	78.9832	NaN	NaN	NaN	NaN	NaN	0.932961	10.375	-0.0468641	-0.250357
UC Davis	Crybb3	homozygote	male	24.15	26.0667	3.1	28.1586	27.9371	21.4271	5.57113	-0.221429	1.8371	88.8511	80.3944	NaN	NaN	NaN	NaN	NaN	0.904964	11	-0.0469641	-0.250891
UC Davis	Tdrp	homozygote	male	24.15	25.0952	3.1	28.8414	28.6514	20.4722	7.08881	-0.19	1.82263	88.1547	79.7471	372.015	787.426	0.0993271	0.0393306	1.28831	0.904022	10.2857	-0.0341354	-0.252103
UC Davis	Dsg1c	homozygote	male	24.15	26.4917	3.1	26.8813	27.0725	19.6662	6.40448	0.19125	1.79541	85.6947	82.6325	NaN	NaN	NaN	NaN	NaN	0.964399	10.875	-0.0472245	-0.252282
HMGU	Gad2	homozygote	male	23.8875	20.75	3.339	27.8	25.375	NaN	NaN	-2.425	1.84779	91.2798	74.0491	NaN	NaN	0.0559524	NaN	0.781676	0.812012	10.125	-0.047229	-0.252307
MRC Harwell	Npc1	heterozygote	male	20.7286	21.7214	NaN	25.9	24.66	19.6128	4.59721	-1.24	2.05943	99.997	88.7231	2720.35	3782.22	NaN	NaN	NaN	0.887833	10.7143	-0.0343807	-0.253915
MRC Harwell	Xbp1	heterozygote	male	19.3375	21	NaN	26.4375	24.6575	20.1137	5.02593	-1.78	2.15345	105.537	89.2992	2901.49	4050.52	NaN	NaN	NaN	0.846565	10.5	-0.0344489	-0.254419
TCP	Rnf216	homozygote	male	26.3938	21.2667	3.1	26.3687	25.5888	21.8899	4.40548	-0.78	1.74153	84.134	76.549	1166.43	3070.7	0.168377	NaN	2.18391	0.908673	10.5	-0.0347649	-0.256752
UC Davis	Higd2a	heterozygote	male	24.15	25.9857	3.1	28.2471	28.0229	NaN	NaN	-0.224286	1.83868	88.327	82.6023	NaN	NaN	NaN	NaN	NaN	0.935171	11	-0.0482626	-0.257828
HMGU	Raet1c	homozygote	male	22.2	20.75	3.339	24.45	23.9875	15.2454	5.75436	-0.4625	1.88323	91.1414	82.2024	NaN	NaN	0.144048	NaN	2.0124	0.902644	10.25	-0.0482737	-0.257887
MRC Harwell	Mindy1	homozygote	male	19.3875	21.0833	NaN	24.7125	23.875	19.3386	4.08322	-0.8375	2.10856	102.168	91.6046	2711.29	3825.66	NaN	NaN	NaN	0.895472	11	-0.0349406	-0.25805
BCM	Tbc1d24	homozygote	male	22.75	21.2333	3.1	26.6333	26.7	18.4045	4.46828	0.0666667	1.90644	91.4689	86.0505	NaN	NaN	NaN	NaN	NaN	0.942529	11	-0.0485733	-0.259488
MRC Harwell	Pak1	homozygote	male	20.575	22	NaN	25.0875	24.6388	18.4531	6.63464	-0.44875	2.03733	98.5098	89.2472	2378.92	3417.92	NaN	NaN	NaN	0.908121	11	-0.0352089	-0.260032
UC Davis	Slc47a2	homozygote	male	24.15	26.2286	3.1	27.9457	28.1457	21.2043	5.17003	0.2	1.82843	87.93	81.8032	NaN	NaN	NaN	NaN	NaN	0.930372	10.5714	-0.04873	-0.260325
UC Davis	Ppdpf	homozygote	male	24.15	23.2333	3.1	28.7175	28.9275	NaN	NaN	0.21	1.81463	87.5584	80.1445	289.863	673.19	0.0851786	0.0509167	1.1048	0.915403	10	-0.0354366	-0.261713
HMGU	Alkbh1	heterozygote	male	22.2125	20.75	3.339	29.7	28.6	22.8969	4.55644	-1.1	2.05172	99.247	89.7292	NaN	NaN	0.129167	NaN	1.80451	0.904881	10.625	-0.0489932	-0.261731
ICS	Nol8	heterozygote	male	21	20.7778	3.145	22.6889	22.4444	14.1326	1.90913	-0.244444	1.88368	92.905	76.0149	741.374	1170.89	0.189048	0.127302	2.48762	0.816083	10	-0.0354815	-0.262045
MRC Harwell	F7	heterozygote	male	20.3313	20.7375	NaN	27.4075	26.7087	19.5367	6.16192	-0.69875	2.085	100.833	91.2683	2129.46	3161.03	NaN	NaN	NaN	0.907154	10.25	-0.035535	-0.26244
WTSI	Dennd1b	homozygote	male	21.5	21.08	3.4	29.44	28.94	23.8858	5.54251	-0.5	2.00794	97.7549	85.5859	1140.67	1716.47	0.169143	0.129524	2.40616	0.875422	11.6	-0.0355726	-0.262718
TCP	Mfap4	homozygote	male	26.8438	21.3583	3.1	27.2087	26.575	21.7207	5.13179	-0.63375	1.70547	82.2603	75.4323	896.924	2337.05	0.149123	NaN	1.93419	0.917604	10.375	-0.035601	-0.262927
WTSI	Rab21	heterozygote	male	21	20.5	3.4	29.475	28.8125	21.5935	7.74988	-0.6625	1.99167	96.4935	86.5643	363.69	569.822	0.159375	4.04226	2.26721	0.898163	11.5	-0.0358019	-0.264411
WTSI	Rnf125	homozygote	male	21	20	3.4	32.1857	30.9857	22.5059	8.99892	-1.2	2.04851	99.1909	89.2365	452.456	690.993	0.124847	3.85374	1.77602	0.899665	11.2857	-0.0358264	-0.264592
UC Davis	Cwc22	heterozygote	male	24.15	26.4714	3.1	28.0229	27.9743	20.2876	6.56556	-0.0485714	1.82975	87.8705	82.2983	NaN	NaN	NaN	NaN	NaN	0.931916	11	-0.0499211	-0.266688
UC Davis	Arhgef12	heterozygote	male	24.15	26.6333	3.1	27.8878	27.5644	21.0075	6.08016	-0.323333	1.82522	87.429	82.8943	NaN	NaN	NaN	NaN	NaN	0.946339	10.7778	-0.0500614	-0.267438
UC Davis	H2-Q10	homozygote	male	24.15	23.2333	3.1	28.72	28.91	20.0412	7.89103	0.19	1.82098	87.5658	81.49	394.179	866.619	0.0946429	0.0516667	1.22756	0.931096	11	-0.0364189	-0.268968
BCM	Dnase1l2	homozygote	male	22.75	21.1633	3.1	23.6	23.2	17.216	3.92826	-0.4	1.80624	86.7563	81.1885	NaN	NaN	NaN	NaN	NaN	0.932175	10.4	-0.0503956	-0.269223
TCP	Ttc28	homozygote	male	27.1062	21.3125	3.1	22.18	22.1325	18.1926	3.36606	-0.0475	1.60859	76.9429	73.4447	1148.11	2735.47	0.168152	NaN	2.18099	0.954375	10	-0.0365579	-0.269994
UC Davis	Pde6a	homozygote	male	24.15	26.4208	3.1	25.9838	26.405	19.3573	5.58458	0.42125	1.7629	84.2238	80.8481	NaN	NaN	NaN	NaN	NaN	0.960347	10.25	-0.0506259	-0.270453
UC Davis	AB124611	homozygote	male	24.15	27.4833	3.1	27.1483	26.8467	NaN	NaN	-0.301667	1.80056	86.5062	80.8527	NaN	NaN	NaN	NaN	NaN	0.933846	10.8333	-0.0507425	-0.271076
MRC Harwell	Retreg3	homozygote	male	19.5375	20.9667	NaN	23.4375	22.2013	19.1652	3.28056	-1.23625	2.08084	101.432	88.2367	2875.43	4001.18	NaN	NaN	NaN	0.869854	10.25	-0.0367298	-0.271264
WTSI	Pbdc1	hemizygote	male	21.5	20.7952	3.4	28.5	28.0143	22.7676	6.58579	-0.485714	1.99933	97	86.4144	1350.65	2005.5	0.174671	0.147619	2.4848	0.890655	11.7143	-0.0369316	-0.272754
UC Davis	Nhsl1	homozygote	male	24.15	28.0905	3.1	26.6486	27.1186	19.8515	5.97257	0.47	1.78397	85.4789	80.9278	NaN	NaN	NaN	NaN	NaN	0.948872	10.7143	-0.0511253	-0.273121
MRC Harwell	Lifr	heterozygote	male	19.9714	21.9333	NaN	26.6714	25.6386	19.3736	5.35962	-1.03286	2.13425	104.335	89.4316	3172.88	4383.2	NaN	NaN	NaN	0.857524	11	-0.0371446	-0.274327
UC Davis	Gpr34	hemizygote	male	24.15	27.8375	3.1	26.5975	26.09	19.6679	5.80028	-0.5075	1.78204	85.5525	80.2482	NaN	NaN	NaN	NaN	NaN	0.937482	10.125	-0.0513988	-0.274582
UC Davis	Asic5	homozygote	male	24.15	27.4833	3.1	29.0883	29.4317	NaN	NaN	0.343333	1.8628	88.9068	85.7484	NaN	NaN	NaN	NaN	NaN	0.964917	10.5	-0.0514258	-0.274727
UC Davis	Pld1	heterozygote	male	24.15	28.3333	3.1	29.3167	29.4633	NaN	NaN	0.146667	1.87008	90.1919	82.7432	NaN	NaN	NaN	NaN	NaN	0.92009	11	-0.0515481	-0.27538
TCP	Tnni2	heterozygote	male	27.3875	21.5875	3.1	25.8012	26.265	20.9254	4.55069	0.46375	1.66312	79.9615	74.4722	1181.82	2744.59	NaN	NaN	NaN	0.931111	10.75	-0.0373635	-0.275944
HMGU	Pbrm1	heterozygote	male	22.245	20.75	3.339	24.48	23.39	19.0317	4.20444	-1.09	1.87673	91.3512	80.0488	NaN	NaN	0.110476	NaN	1.54339	0.875082	10.8	-0.051882	-0.277163
UC Davis	Ddt	homozygote	male	24.15	27.2	3.1	28.3629	28.7786	20.2316	7.42442	0.415714	1.83841	87.9937	83.7326	NaN	NaN	NaN	NaN	NaN	0.951218	10	-0.0522802	-0.279291
ICS	Coq6	heterozygote	male	21	21	3.145	23.64	24.12	15.965	2.81415	0.48	1.90596	92.2727	83.0818	835.345	1341.05	0.257905	0.149048	3.39369	0.900276	10	-0.0379646	-0.280383
TCP	Cstdc2	homozygote	male	26.2	21.9476	3.1	28.0486	27.4743	22.7642	5.26383	-0.574286	1.76941	85.256	78.5769	1060.13	2768.25	NaN	NaN	NaN	0.920147	10.2857	-0.0381572	-0.281806
TCP	Baz1a	homozygote	male	26.8813	21.3125	3.1	23.985	23.49	18.5978	4.36336	-0.495	1.6442	79.7061	71.295	970.473	2483.48	0.121111	NaN	1.57086	0.895017	10.375	-0.0381884	-0.282036
BCM	Abca13	homozygote	male	22.75	21.2333	3.1	25.5333	25.2667	17.7546	3.39371	-0.266667	1.86652	90.1548	82.1048	NaN	NaN	NaN	NaN	NaN	0.910052	10	-0.0528227	-0.282189
WTSI	Syt16	homozygote	male	21.5	21.0143	3.4	28.7714	28.1714	23.5765	4.76729	-0.6	1.99307	96.9074	85.3915	1137.69	1734.91	0.177914	0.146939	2.53093	0.880894	11.1429	-0.0382408	-0.282423
MRC Harwell	Pcnx3	heterozygote	male	19.8944	21.1556	NaN	25.6778	24.0011	NaN	NaN	-1.67667	2.0806	101.005	89.7068	2378.79	3388.87	NaN	NaN	NaN	0.887386	10.6667	-0.0382493	-0.282486
WTSI	Dbn1	heterozygote	male	21.5	20.9905	3.4	28.9429	28.5429	24.0888	4.69385	-0.4	1.99599	96.3669	87.9493	1089.79	1725.46	0.190317	0.155102	2.70738	0.912488	11.4286	-0.0382683	-0.282627
WTSI	Minar2	homozygote	male	21	20.7143	3.4	27.9429	27.5571	19.4218	8.28378	-0.385714	1.96682	94.7689	87.3381	519.267	763.812	0.187075	3.92313	2.66125	0.922038	11.2857	-0.0383997	-0.283597
WTSI	Ildr1	homozygote	male	21.5	20.9833	3.4	28.2833	27.85	23.6214	4.81656	-0.433333	2.00147	96.889	87.2725	1517.27	2213.11	0.181508	0.146825	2.58206	0.900588	11.8333	-0.0384279	-0.283805
HMGU	Marco	homozygote	male	22.53	20.75	3.339	27.5	26.28	19.1562	4.79248	-1.22	1.94892	94.3357	85.0143	NaN	NaN	0.116667	NaN	1.62988	0.901638	10.2	-0.0531299	-0.28383
TCP	S100a14	heterozygote	male	26.6562	21.5875	3.1	26.4875	26.4112	20.2871	6.09059	-0.07625	1.71517	82.9905	74.9284	1070.98	2777.91	0.131855	NaN	1.71022	0.905262	10.375	-0.0384972	-0.284317
MRC Harwell	Cyp4f16	homozygote	male	20.4688	21.25	NaN	26.225	25.9275	20.9666	4.20722	-0.2975	2.04924	98.926	90.3372	2142.06	3090.69	NaN	NaN	NaN	0.9128	10.375	-0.0385528	-0.284728
UC Davis	Lypd6b	homozygote	male	24.15	27.7667	3.1	27.02	27.2286	20.9656	4.95445	0.208571	1.79383	85.9115	81.518	NaN	NaN	NaN	NaN	NaN	0.949973	11.1429	-0.0533072	-0.284777
WTSI	Cdkn2aipnl	homozygote	male	21	20.5714	3.4	28.2286	27.5429	22.2634	5.83645	-0.685714	1.97087	95.5512	85.4275	490.156	731.327	0.153248	3.96871	2.18005	0.894882	12	-0.038631	-0.285305
WTSI	4932438H23Rik	homozygote	male	21.5	20.6429	3.4	28.6857	27.9143	21.6913	6.94005	-0.771429	2.00247	97.8747	83.9763	1375.14	2041.23	0.165057	0.12449	2.34803	0.858174	12	-0.03872	-0.285963
MRC Harwell	Gfod2	heterozygote	male	20.2312	21.6667	NaN	26.5	25.8438	NaN	NaN	-0.65625	2.07866	100.375	91.531	2365.83	3403.26	NaN	NaN	NaN	0.911153	10.625	-0.0387781	-0.286392
TCP	Pstpip2	homozygote	male	27.5063	21.3125	3.1	26.3	25.485	21.414	4.32168	-0.815	1.64298	79.1483	73.0183	819.13	2160.63	NaN	NaN	NaN	0.921357	10.75	-0.0388528	-0.286943
TCP	Aktip	homozygote	male	26.675	21.5417	3.1	24.5162	25.275	18.4218	5.23487	0.75875	1.75523	84.1426	79.4799	1974.49	4887.86	0.183409	NaN	2.37889	0.945409	10.875	-0.038855	-0.28696
WTSI	Adgrd1	homozygote	male	21	24.5714	3.4	28.9429	27.8571	21.6643	6.97154	-1.08571	1.9794	96.1816	85.0236	393.458	598.647	0.136508	4.0551	1.94191	0.884175	12	-0.0388917	-0.287231
UC Davis	C1ra	homozygote	male	24.15	23.2333	3.1	26.02	26.87	19.0866	5.79491	0.85	1.7699	85.058	79.3873	472.405	967.571	0.0935714	0.0597143	1.21366	0.933331	11	-0.0392043	-0.289539
WTSI	Myt1l	homozygote	male	21.5	20.3071	3.4	29.3571	29.8143	22.016	7.55841	0.457143	2.02414	97.667	89.3996	1588.3	2287.44	0.219705	0.201361	3.12544	0.915063	12	-0.0392746	-0.290059
UC Davis	Dpy19l1	heterozygote	male	24.15	27.6048	3.1	26.9586	27.0357	NaN	NaN	0.0771429	1.79084	85.5895	82.0195	NaN	NaN	NaN	NaN	NaN	0.957141	10.7143	-0.0543039	-0.290102
HMGU	Fyb	homozygote	male	24.3714	20.75	3.339	24.9571	24.5	NaN	NaN	-0.457143	1.70683	82.3639	75.3571	NaN	NaN	0.12449	NaN	1.73917	0.915967	10.1429	-0.0543599	-0.290401
UC Davis	Zdhhc23	homozygote	male	24.15	26.5625	3.1	28.9862	29.1337	21.2572	6.1564	0.1475	1.85653	89.1459	83.541	NaN	NaN	NaN	NaN	NaN	0.937524	10.875	-0.0543869	-0.290545
WTSI	Ccdc24	homozygote	male	21.5	20.7381	3.4	30.8571	30.4286	24.3484	6.40442	-0.428571	2.04087	99.0236	88.1796	1317.09	1965.14	0.168889	0.146939	2.40255	0.891724	11.1429	-0.0393576	-0.290672
WTSI	Oxr1	heterozygote	male	21.5	21.1187	3.4	29.0875	28.3125	22.6365	6.4027	-0.775	2.0172	98.5952	84.591	1554.29	2244.36	0.164568	0.127381	2.34108	0.857816	11.25	-0.0393963	-0.290957
UC Davis	Pms1	homozygote	male	24.15	27.3619	3.1	28.2014	28.2429	20.9851	6.11743	0.0414286	1.83095	87.9435	82.2994	NaN	NaN	NaN	NaN	NaN	0.935899	11	-0.054505	-0.291176
MRC Harwell	Fgf22	homozygote	male	20.0167	20.9333	NaN	25.9667	25.9567	19.94	4.91261	-0.01	2.07001	100.53	89.1085	2148.56	3163.71	NaN	NaN	NaN	0.887487	10.3333	-0.039474	-0.291531
UC Davis	Tfec	heterozygote	male	24.15	28.9	3.1	27.43	27.82	19.7396	6.54246	0.39	1.80585	86.9267	80.4982	NaN	NaN	NaN	NaN	NaN	0.926046	10	-0.0545846	-0.291601
HMGU	Fbp2	heterozygote	male	24.5	20.75	3.339	24.9	24.3625	15.8745	6.04476	-0.5375	1.69358	82.2679	72.8363	NaN	NaN	0.114286	NaN	1.59661	0.885711	10.25	-0.0546973	-0.292204
UC Davis	B3galt2	heterozygote	male	24.15	28.9	3.1	26.0125	26.6025	21.1389	5.02721	0.59	1.75974	83.9967	80.974	NaN	NaN	NaN	NaN	NaN	0.9666	10.625	-0.0547204	-0.292327
HMGU	Rab35	heterozygote	male	24.3	20.75	3.339	25.2571	24.0429	NaN	NaN	-1.21429	1.72233	84.0578	72.6718	NaN	NaN	0.0993197	NaN	1.38753	0.863139	10.4286	-0.05473	-0.292378
HMGU	Vdac1	heterozygote	male	22.45	20.75	3.339	25.8571	23.6	19.3741	4.41122	-2.25714	1.90085	93.165	78.7993	NaN	NaN	0.0809524	NaN	1.13094	0.845182	11	-0.0547904	-0.292701
HMGU	Frmd5	homozygote	male	24.3	20.75	3.339	24.625	24.4	NaN	NaN	-0.225	1.70157	82.8125	72.622	NaN	NaN	0.119048	NaN	1.66314	0.875715	10.5	-0.0549915	-0.293775
UC Davis	Gm14496	homozygote	male	24.15	25.925	3.1	28.0775	28.9425	20.4039	6.73289	0.865	1.82629	86.9232	84.927	NaN	NaN	NaN	NaN	NaN	0.977627	10.375	-0.0551493	-0.294618
UC Davis	Cdk6	homozygote	male	24.15	25.7429	3.1	26.0329	25.8486	NaN	NaN	-0.184286	1.75978	84.3154	79.8459	NaN	NaN	NaN	NaN	NaN	0.942485	10.7143	-0.0553459	-0.295668
HMGU	Lactb	homozygote	male	22.375	20.75	3.339	27.55	26.3875	19.6703	4.73044	-1.1625	1.96098	95.4494	83.6518	NaN	NaN	0.118452	NaN	1.65482	0.878572	10.75	-0.0560249	-0.299296
WTSI	G3bp2	heterozygote	male	21.5	21.1429	3.4	28.6429	27.6143	22.7912	5.37508	-1.02857	2.00894	98.0003	84.9276	1563.78	2283.33	0.152653	0.112245	2.17158	0.866015	11.8571	-0.0405352	-0.299369
UC Davis	Bcl2l12	homozygote	male	24.15	26.6625	3.1	26.3025	26.4937	19.8045	5.39932	0.19125	1.7678	84.6645	80.3359	NaN	NaN	NaN	NaN	NaN	0.949444	10.125	-0.0560677	-0.299524
UC Davis	Ndrg1	homozygote	male	24.15	28.2524	3.1	26.6329	25.8486	19.8902	5.85255	-0.784286	1.77844	84.9299	81.6898	NaN	NaN	NaN	NaN	NaN	0.961641	10.8571	-0.0561421	-0.299922
TCP	Prdm12	heterozygote	male	26.1929	21.3714	3.1	29.1443	27.5043	21.1643	7.85818	-1.64	1.745	85.1853	73.5526	535.018	1613.5	NaN	NaN	NaN	0.862742	10.7143	-0.0406137	-0.299948
UC Davis	Slc6a5	heterozygote	male	24.15	28.3333	3.1	27.68	28.2829	20.6508	6.31749	0.602857	1.81238	87.3962	80.2355	NaN	NaN	NaN	NaN	NaN	0.917565	11	-0.0561674	-0.300057
WTSI	Dmxl2	heterozygote	male	21.5	20.9619	3.4	31.9286	31.2857	23.4472	8.47956	-0.642857	2.04993	100.104	86.2886	1106.67	1690.76	0.168322	0.131973	2.39448	0.864316	11.7143	-0.0406386	-0.300132
UC Davis	Csf3r	heterozygote	male	24.15	26.0667	3.1	28.6657	28.9543	21.7656	5.51303	0.288571	1.84396	88.3841	83.5401	NaN	NaN	NaN	NaN	NaN	0.943815	11	-0.0565571	-0.302139
MRC Harwell	Coq2	heterozygote	male	20.3875	21.3875	NaN	27.075	25.9312	19.8025	6.19125	-1.14375	2.08813	101.05	91.1733	2535.57	3636.56	NaN	NaN	NaN	0.902163	10.875	-0.0409187	-0.302201
TCP	Gng13	heterozygote	male	26.425	21.3125	3.1	28.5025	28.0287	19.8922	8.21662	-0.47375	1.78327	86.9114	75.6715	1446.51	3296.74	0.133185	NaN	1.72746	0.872971	10.5	-0.0410577	-0.303228
ICS	Pgam5	homozygote	male	21	20	3.145	21.7333	21.5333	15.0892	2.13299	-0.2	1.86423	90.3022	81.0861	828.682	1294.12	0.220159	0.125238	2.897	0.896232	8	-0.0411341	-0.303792
TCP	Fadd	heterozygote	male	26.5571	21.5286	3.1	27.4514	27.3186	19.6152	7.13846	-0.132857	1.75531	85.1913	75.76	1296.74	3280.97	0.149425	NaN	1.9381	0.889955	10.4286	-0.0411447	-0.30387
MRC Harwell	Cbx2	heterozygote	male	19.25	21.4667	NaN	25.8625	24.8725	NaN	NaN	-0.99	2.13171	103.624	91.4194	2708.17	3822.84	NaN	NaN	NaN	0.882172	10.625	-0.0411475	-0.30389
UC Davis	Acvr1	heterozygote	male	24.15	26.4208	3.1	28.4325	28.7413	20.8684	6.34221	0.30875	1.836	88.6144	80.999	NaN	NaN	NaN	NaN	NaN	0.912883	10.625	-0.0569545	-0.304262
UC Davis	Havcr2	homozygote	male	24.15	27.2	3.1	27.98	28.6929	21.5922	5.53418	0.712857	1.82131	87.2785	82.585	NaN	NaN	NaN	NaN	NaN	0.947857	10.8571	-0.0569668	-0.304328
WTSI	Vps51	heterozygote	male	21.5	20.4905	3.4	29.5429	28.8429	23.3478	5.80851	-0.7	2.0266	98.2391	87.8914	1577.31	2309.44	0.175488	0.134694	2.49642	0.895084	11.2857	-0.0412316	-0.304512
TCP	Gpc2	homozygote	male	26.6	21.6333	3.1	23.36	24.505	20.2767	6.90367	1.145	1.62749	78.798	70.9184	804.985	2045.54	0.153409	NaN	1.98978	0.901585	10	-0.0412385	-0.304563
WTSI	Entpd6	homozygote	male	21.5	21.1833	3.4	27.9667	27.6833	23.8163	3.67044	-0.283333	1.96325	94.7897	86.4936	888.958	1436.24	0.18619	0.15	2.64867	0.912589	11.6667	-0.0412855	-0.30491
UC Davis	Slc17a9	homozygote	male	24.15	27.8476	3.1	26.2586	26.9814	20.2692	4.8694	0.722857	1.76536	85.0177	78.5502	NaN	NaN	NaN	NaN	NaN	0.923628	11	-0.0570828	-0.304947
UC Davis	Calcb	homozygote	male	24.15	27.2	3.1	27.9962	27.5012	NaN	NaN	-0.495	1.82172	87.2798	82.6689	NaN	NaN	NaN	NaN	NaN	0.948374	10.5	-0.0570843	-0.304955
HMGU	Dis3	heterozygote	male	24.55	20.75	3.339	26.6625	25.425	NaN	NaN	-1.2375	1.74404	85.0908	73.6815	NaN	NaN	0.102976	NaN	1.43862	0.866548	10.625	-0.0571034	-0.305057
MRC Harwell	Arhgef28	homozygote	male	19.2563	21.6667	NaN	25.725	24.83	18.9871	5.12621	-0.895	2.1081	102.933	88.7772	2319.72	3281.26	NaN	NaN	NaN	0.864531	10.375	-0.0413835	-0.305633
HMGU	Dner	homozygote	male	24.2167	20.75	3.339	24.6111	23.4556	15.2955	5.83118	-1.15556	1.70597	83.1746	72.2831	NaN	NaN	0.0968254	NaN	1.35269	0.869036	10.5556	-0.0573065	-0.306142
UC Davis	Ccdc141	homozygote	male	24.15	24.0667	3.1	27.06	27.73	NaN	NaN	0.67	1.7679	84.3662	81.4198	180.762	443.893	0.0841667	0.0405952	1.09168	0.967316	11	-0.0415549	-0.306899
UC Davis	Gpx4	heterozygote	male	24.15	25.9857	3.1	26.9414	27.6443	20.1774	5.99622	0.702857	1.78682	85.3057	82.1622	NaN	NaN	NaN	NaN	NaN	0.963209	10	-0.0577673	-0.308604
MRC Harwell	Sncb	homozygote	male	20.2812	21.9062	NaN	26.35	26.365	20.6368	5.42886	0.015	2.07894	100.045	92.77	2503.04	3638.27	NaN	NaN	NaN	0.927156	10.625	-0.0418007	-0.308715
UC Davis	Ripk3	homozygote	male	24.15	27.7667	3.1	27.7383	28.415	19.8463	7.12502	0.676667	1.81248	87.4485	80.0714	NaN	NaN	NaN	NaN	NaN	0.915833	10.6667	-0.0579572	-0.309618
WTSI	Wfdc18	homozygote	male	21.5	21.2861	3.4	31.25	29.9	NaN	NaN	-1.35	2.03428	99.6923	84.3737	1059.44	1658.66	0.16504	0.101587	2.34779	0.846121	11	-0.0419845	-0.310072
MRC Harwell	Dicer1	heterozygote	male	20.3062	21.7	NaN	28.825	27.275	20.6673	6.46939	-1.55	2.14302	104.147	92	2929.56	4113.13	NaN	NaN	NaN	0.883744	10	-0.0420358	-0.310451
WTSI	Gprc5b	homozygote	male	21.5	20.7762	3.4	27.7143	27.2857	23.354	4.7285	-0.428571	1.98888	96.9039	84.4994	1556.87	2271.37	0.183537	0.176871	2.61093	0.87263	11.1429	-0.0422268	-0.311861
UC Davis	Creb3	heterozygote	male	24.15	27.1292	3.1	25.5025	25.8087	19.7494	4.90982	0.30625	1.73948	82.9845	80.2033	NaN	NaN	NaN	NaN	NaN	0.963673	10.5	-0.0584359	-0.312176
UC Davis	Slc39a4	heterozygote	male	24.15	26.6333	3.1	31.3975	31.6013	21.3273	9.07632	0.20375	1.93068	91.8974	89.7604	NaN	NaN	NaN	NaN	NaN	0.976563	10.5	-0.0584444	-0.312221
WTSI	Pqlc3	homozygote	male	21.5	20.5214	3.4	30.2571	29.2429	24.2464	5.97433	-1.01429	2.03636	99.0433	87.1361	1563.86	2230.98	0.174082	0.120408	2.47642	0.879837	11.5714	-0.0422949	-0.312364
MRC Harwell	Marveld2	homozygote	male	20.35	21.425	NaN	25.975	24.7138	19.2322	5.8257	-1.26125	2.10198	101.294	93.2953	3304.76	4553.77	NaN	NaN	NaN	0.920937	10.75	-0.0423606	-0.31285
UC Davis	Wfdc1	homozygote	male	24.15	23.2333	3.1	25.8	25.795	19.2158	5.85464	-0.005	1.75795	84.273	79.6016	360.381	846.762	0.108452	0.0388095	1.40667	0.94443	10	-0.0423632	-0.312869
WTSI	Dbn1	homozygote	male	21.5	21	3.4	26.7	25.5	22.5854	4.15444	-1.2	1.96067	95.4754	83.4918	1269.81	2047.33	0.134286	0.119048	1.91029	0.874485	12	-0.0424382	-0.313423
TCP	Lnpep	homozygote	male	27.1875	21.5875	3.1	27.2375	26.2575	21.3346	4.7917	-0.98	1.67274	80.6415	74.1295	770.722	2124.56	NaN	NaN	NaN	0.920303	10.25	-0.0426869	-0.31526
HMGU	Kif20a	heterozygote	male	24.41	20.75	3.339	27.83	27.13	NaN	NaN	-0.7	1.79186	87.2381	76.3655	NaN	NaN	0.123333	NaN	1.72301	0.875881	11	-0.0591849	-0.316177
WTSI	Slitrk4	hemizygote	male	21	22	3.4	27.425	26.825	20.7663	6.7215	-0.6	1.94926	95.3761	81.3802	481.13	684.13	0.159405	4.19286	2.26763	0.853251	11	-0.0429652	-0.317315
WTSI	Wdr37	homozygote	male	21.5	19.8238	3.4	25.8	25.3571	21.5683	3.77712	-0.442857	1.9439	95.2703	80.5998	1397.44	2079.32	0.147619	0.156463	2.09997	0.846515	11.2857	-0.0430419	-0.317881
WTSI	Nacad	homozygote	male	21.5	21.2667	3.4	28.84	28.88	22.3908	6.35716	0.04	1.99238	96.2659	87.5281	1191.18	1810.81	0.198781	0.137143	2.82778	0.909013	11.8	-0.0431122	-0.318401
UC Davis	Lor	heterozygote	male	24.15	30.1952	3.1	29.4429	29.1586	21.601	6.30456	-0.284286	1.86603	90.2372	81.7056	NaN	NaN	NaN	NaN	NaN	0.905625	11	-0.0596962	-0.318909
UC Davis	Prl7b1	homozygote	male	24.15	28.5	3.1	27.1571	26.8614	19.6763	6.20846	-0.295714	1.76789	85.8045	76.2928	176.37	438.134	0.0463719	0.0200567	0.601462	0.889281	10.2857	-0.0432222	-0.319213
TCP	Nhlh1	heterozygote	male	27.1062	21.5417	3.1	25.3525	25.4275	20.5334	3.77766	0.075	1.67328	80.3636	75.2346	1192.42	3008	NaN	NaN	NaN	0.935928	10.375	-0.0433466	-0.320132
TCP	Prag1	homozygote	male	26.1187	21.2208	3.1	25.6487	25.2375	20.8485	4.56357	-0.41125	1.71357	82.5634	76.1027	1013.49	2540.98	NaN	NaN	NaN	0.922388	10.375	-0.0434412	-0.32083
UC Davis	Tas2r139	homozygote	male	24.15	26.8458	3.1	26.4459	27.3238	19.0802	6.52354	0.877875	1.76825	84.2455	81.9263	NaN	NaN	NaN	NaN	NaN	0.972967	10.875	-0.0602674	-0.32196
MRC Harwell	Trpm1	homozygote	male	20.675	21.5333	NaN	25.85	25.73	19.6035	5.46165	-0.12	2.06972	99.837	91.5163	3075.46	4252.13	NaN	NaN	NaN	0.91679	10.375	-0.0436577	-0.322429
HMGU	Rnf10	heterozygote	male	23.95	20.75	3.339	24.6	23.65	15.395	6.10175	-0.95	1.7254	84.0387	73.4033	NaN	NaN	0.104167	NaN	1.45525	0.873317	10	-0.0604511	-0.322941
UC Davis	Ccl8	homozygote	male	24.15	28.3333	3.1	29.6729	29.8271	22.3415	5.74887	0.154286	1.87199	90.2918	82.8	NaN	NaN	NaN	NaN	NaN	0.917496	11	-0.0611908	-0.326893
UC Davis	Olfr380	homozygote	male	24.15	31.7708	3.1	25.9775	26.2675	19.4089	5.77289	0.29	1.75202	83.4897	81.112	NaN	NaN	NaN	NaN	NaN	0.971926	10	-0.0613063	-0.32751
HMGU	Mthfsl	homozygote	male	24.4625	20.75	3.339	24.3625	23.5375	NaN	NaN	-0.825	1.67265	81.5536	70.8586	NaN	NaN	0.0952381	NaN	1.33051	0.867526	10.75	-0.0614191	-0.328112
UC Davis	Hacl1	heterozygote	male	24.15	27.6333	3.1	29.92	30.35	23.8717	5.0007	0.43	1.87967	90.7133	82.9562	NaN	NaN	NaN	NaN	NaN	0.914488	11	-0.0615336	-0.328725
WTSI	Prame	hemizygote	male	21.5	20.8	3.4	27.8167	27.5	22.2019	5.48934	-0.316667	2.00165	97.6256	84.6869	1845.09	2621.52	0.178175	0.138889	2.53464	0.868447	12	-0.0446199	-0.329535
WTSI	Dynlrb1	heterozygote	male	21.5	21.0476	3.4	29.3857	28.5	22.4046	6.91697	-0.885714	2.00684	98.3687	83.1606	1312.83	1956.54	0.148923	0.103401	2.11852	0.848476	11.8571	-0.0446663	-0.329879
MRC Harwell	Lyn	homozygote	male	20.3333	21.3333	NaN	25.3667	24.1783	19.5632	5.95766	-1.18833	2.05361	99.659	88.6692	2619.1	3622.56	NaN	NaN	NaN	0.88987	10.5	-0.044815	-0.330977
HMGU	Eef1a2	heterozygote	male	21.8	20.75	3.339	25.725	24.7625	15.2046	8.13943	-0.9625	1.94522	94.6027	83.2634	NaN	NaN	0.11369	NaN	1.5883	0.883628	11	-0.0620487	-0.331476
UC Davis	Ap2s1	heterozygote	male	24.15	23.2333	3.1	28.9	28.1367	21.1032	7.20323	-0.763333	1.81864	87.7624	80.2847	442.373	937.754	0.0915079	0.0474603	1.18689	0.914484	10.6667	-0.0449076	-0.33166
HMGU	Becn1	heterozygote	male	22	20.75	3.339	27.55	26.3083	21.9602	2.9334	-1.24167	1.98696	96.1181	86.8829	NaN	NaN	0.14127	NaN	1.97359	0.903018	10	-0.0623021	-0.33283
UC Davis	Terb1	heterozygote	male	24.15	28.0905	3.1	27.78	28.7129	20.8227	5.95622	0.932857	1.80936	86.8401	81.5654	NaN	NaN	NaN	NaN	NaN	0.940651	10.2857	-0.062427	-0.333497
HMGU	Slc47a1	homozygote	male	24.21	20.75	3.339	24.08	23.56	NaN	NaN	-0.52	1.68417	81.5679	73.2988	NaN	NaN	0.124762	NaN	1.74297	0.897258	10.4	-0.0624471	-0.333605
TCP	Arl8b	heterozygote	male	25.75	20.9917	3.1	25.7512	25.145	20.146	5.06774	-0.60625	1.74231	84.5435	75.258	1164.39	2780.54	0.154554	NaN	2.00463	0.890555	10.5	-0.0452109	-0.333901
UC Davis	Doxl2	homozygote	male	24.15	28.1208	3.1	25.2638	25.5212	19.3002	5.06044	0.2575	1.72764	82.8104	78.2643	NaN	NaN	NaN	NaN	NaN	0.946755	10.25	-0.062536	-0.33408
TCP	Epha5	homozygote	male	26.5875	21.8167	3.1	26.2287	25.7512	21.2279	4.29374	-0.4775	1.69153	81.3204	75.7691	909.382	2364.85	NaN	NaN	NaN	0.929912	10.625	-0.0452378	-0.334099
UC Davis	Tmbim7	heterozygote	male	24.15	26.2792	3.1	27.7425	27.7125	19.9667	6.88336	-0.03	1.80794	86.4885	82.511	NaN	NaN	NaN	NaN	NaN	0.954752	10	-0.0626321	-0.334593
UC Davis	Unc119	homozygote	male	24.15	27.6533	3.1	27.827	27.964	21.0405	5.46757	0.137	1.81056	87.4355	79.702	NaN	NaN	NaN	NaN	NaN	0.911926	10.5	-0.0627568	-0.335259
HMGU	Rnls	homozygote	male	21.55	20.7333	3.339	28.24	27.25	17.3801	8.41484	-0.99	2.04758	99.4575	88.0853	NaN	NaN	0.121429	NaN	1.6964	0.887155	10.9	-0.0627583	-0.335267
UC Davis	Plcb2	homozygote	male	24.15	26.1375	3.1	26.0912	26.2688	19.8028	5.10103	0.1775	1.75421	85.2694	75.2444	NaN	NaN	NaN	NaN	NaN	0.881591	10.875	-0.0628025	-0.335503
WTSI	Ppil3	homozygote	male	21	21.4286	3.4	28.6857	28.1429	21.0423	7.40753	-0.542857	1.97837	96.0097	85.413	587.248	878.1	0.152109	4.24354	2.16384	0.890058	12	-0.045486	-0.335932
UC Davis	Recql4	heterozygote	male	24.15	25.9048	3.1	29.0814	29.1029	19.7364	8.60965	0.0214286	1.85098	89.1621	82.2857	NaN	NaN	NaN	NaN	NaN	0.922649	10	-0.0630161	-0.336644
HMGU	Zbtb24	heterozygote	male	24.6	20.75	3.339	24.525	23.85	14.6539	6.97955	-0.675	1.66446	80.5387	72.7054	NaN	NaN	0.121429	NaN	1.6964	0.901224	10	-0.0630516	-0.336834
UC Davis	Erf	heterozygote	male	24.15	25.5	3.1	24.6725	24.8425	19.2535	4.46345	0.17	1.70748	81.6261	78.1284	NaN	NaN	NaN	NaN	NaN	0.955048	10.125	-0.0635154	-0.339311
UC Davis	Tlr2	homozygote	male	24.15	28.219	3.1	29.4686	29.79	NaN	NaN	0.321429	1.86303	89.4027	84.0309	NaN	NaN	NaN	NaN	NaN	0.939891	10.4286	-0.0635308	-0.339394
HMGU	Dhdds	heterozygote	male	22.275	20.75	3.339	27.1125	25.5286	17.0265	7.42863	-1.02857	1.9478	94.6845	83.5298	NaN	NaN	0.118452	NaN	1.65482	0.881706	10.125	-0.0636131	-0.339833
HMGU	Nacc1	homozygote	male	21.55	20.6667	3.339	22.8667	21.8667	15.0313	5.89218	-1	1.87243	90.8889	80.7672	NaN	NaN	0.120635	NaN	1.68532	0.883958	10.6667	-0.0636323	-0.339936
WTSI	Apool	hemizygote	male	21.5	20.7738	3.4	30.8	29.9857	22.6104	8.10546	-0.814286	2.03102	99.6961	83.6564	1263.2	1914.47	0.155136	0.113605	2.2069	0.83897	11.7143	-0.0461906	-0.341136
HMGU	Ppy	homozygote	male	22.2333	20.75	3.339	26.5667	25.6667	16.9982	7.3148	-0.9	1.93342	93.9504	83.0377	NaN	NaN	0.125397	NaN	1.75184	0.886465	10.5	-0.0638753	-0.341234
HMGU	Cdc123	heterozygote	male	22.3111	20.75	3.339	25.0556	24.6889	15.5766	6.01734	-0.366667	1.87752	90.4868	83.3003	NaN	NaN	0.153968	NaN	2.15099	0.920511	10.1111	-0.0640707	-0.342278
MRC Harwell	Slc39a8	heterozygote	male	19.8125	20.9	NaN	26.125	24.7837	18.7749	6.09857	-1.34125	2.10184	102.035	90.625	2721.81	3827.55	NaN	NaN	NaN	0.887926	11	-0.0464892	-0.343341
TCP	Ctsk	homozygote	male	26.2625	21.6792	3.1	23.66	24.0925	18.8898	4.04904	0.4325	1.64945	79.0325	74.8298	842.284	2142.57	0.208182	NaN	2.7002	0.948902	10.5	-0.0465721	-0.343953
WTSI	Kifap3	heterozygote	male	21.5	20.8333	3.4	29.75	28.7333	22.3974	6.95622	-1.01667	2.02066	99.0984	83.5464	1521.58	2190.22	0.148233	0.124603	2.1087	0.844031	11.5	-0.0466767	-0.344726
TCP	Abca14	homozygote	male	26.9563	21.6333	3.1	26.455	25.5338	20.8849	4.39664	-0.92125	1.6721	80.4436	74.6955	803.148	2292.44	NaN	NaN	NaN	0.928149	10.625	-0.0467907	-0.345568
HMGU	Cant1	heterozygote	male	23.125	20.75	3.339	28.6375	28.125	17.3682	7.40545	-0.5125	1.92306	93.686	81.7411	NaN	NaN	0.114286	NaN	1.59661	0.871977	10.25	-0.0647061	-0.345673
HMGU	Bms1	heterozygote	male	24.65	20.75	3.339	27.875	26.7875	16.6752	7.80842	-1.0875	1.76698	86.1696	74.7946	NaN	NaN	0.107738	NaN	1.50514	0.868159	10	-0.0648882	-0.346645
HMGU	Oplah	homozygote	male	24.475	20.75	3.339	25.6	25.15	NaN	NaN	-0.45	1.70808	82.9167	73.6577	NaN	NaN	0.12619	NaN	1.76293	0.887894	11	-0.0650522	-0.347522
UC Davis	H2-Q10	homozygote	male	24.15	26.0667	3.1	28.015	27.635	19.9273	7.22027	-0.38	1.81415	87.2121	81.2746	NaN	NaN	NaN	NaN	NaN	0.932326	10	-0.0652597	-0.34863
MRC Harwell	Rnd3	heterozygote	male	20.425	21.6542	NaN	28.1125	26.8	22.1565	5.14116	-1.3125	2.09774	101.557	91.4451	2535.19	3588.35	NaN	NaN	NaN	0.900505	10	-0.047524	-0.350984
HMGU	Anxa3	homozygote	male	23.425	20.75	3.339	25.1833	24.1167	15.748	6.76766	-1.06667	1.78396	86.1766	78.4405	NaN	NaN	0.138095	NaN	1.92924	0.908716	10.5	-0.0659661	-0.352404
WTSI	Xndc1	homozygote	male	21.5	20.7405	3.4	29.0143	28.4857	22.7251	6.26155	-0.528571	1.99321	97.5255	83.2195	1266.8	1873.86	0.169949	0.151701	2.41763	0.85315	11.1429	-0.0480176	-0.354629
TCP	Slc9a3	heterozygote	male	26.7563	21.6333	3.1	26.2862	24.76	21.719	4.15012	-1.52625	1.6579	80.2587	72.2864	603.627	1753.97	0.136788	NaN	1.77419	0.900726	10.25	-0.0480394	-0.35479
TCP	Cox7a1	homozygote	male	26.5188	21.5875	3.1	27.0312	25.9563	21.8878	5.12101	-1.075	1.71161	82.5957	75.5651	929.036	2472.42	0.175909	NaN	2.28161	0.913611	10.5	-0.0483265	-0.35691
HMGU	Mocs2	heterozygote	male	24.05	20.75	3.339	25.7571	24.4143	NaN	NaN	-1.34286	1.74782	85.0204	74.75	NaN	NaN	0.0945578	NaN	1.32101	0.880139	11	-0.0669612	-0.35772
WTSI	Cbx5	homozygote	male	21.5	20.9028	3.4	26.6833	26.0833	20.6825	6.00054	-0.6	1.9644	96.0778	82.1528	1585.53	2319.28	0.165992	0.123016	2.36134	0.856055	11.3333	-0.0486201	-0.359079
MRC Harwell	Atg3	heterozygote	male	19.475	22	NaN	26.1667	25.0567	18.928	6.11263	-1.11	2.10897	102.481	90.5768	2541.95	3578	NaN	NaN	NaN	0.884244	11	-0.0486276	-0.359134
HMGU	Vwa8	homozygote	male	22.325	20.75	3.339	24.8875	24.3625	15.356	5.973	-0.525	1.86766	90.2143	82.1399	NaN	NaN	0.144643	NaN	2.02072	0.911758	10.125	-0.0672881	-0.359466
WTSI	Mroh4	homozygote	male	21	20.2857	3.4	30.2143	29.8286	20.9833	8.45399	-0.385714	1.98898	96.4913	85.9909	288.688	465.216	0.162834	3.87823	2.31642	0.892069	11.4286	-0.0488179	-0.360539
WTSI	Gm13119	homozygote	male	21	20.2857	3.4	28.4714	27.5857	22.2335	5.46726	-0.885714	1.95819	94.6802	85.7892	338.532	540.628	0.162766	3.79932	2.31545	0.906667	12	-0.0488254	-0.360595
MRC Harwell	Gfi1b	heterozygote	male	20.8125	22.4833	NaN	27.5875	26.36	20.6843	6.09235	-1.2275	2.08507	101.807	87.8125	NaN	NaN	NaN	NaN	NaN	0.862794	11	-0.0675466	-0.360847
WTSI	Lztr1	heterozygote	male	21.5	20.5461	3.4	27.7286	26.6571	23.0618	4.58957	-1.07143	1.98929	98.0326	80.5664	1702.82	2455.63	0.13907	0.122653	1.97836	0.821503	11.2857	-0.0490301	-0.362107
UC Davis	Lrrtm3	homozygote	male	24.15	26.6333	3.1	27.7343	27.8386	20.8622	6.80064	0.104286	1.80248	86.5427	81.1372	NaN	NaN	NaN	NaN	NaN	0.936794	11	-0.0678301	-0.362362
WTSI	Tgfb1i1	homozygote	male	21	20.875	3.4	30.275	29.0125	22.0511	8.17907	-1.2625	1.99355	97.2249	84.365	369.29	571.525	0.15004	4.17083	2.1344	0.867866	11.5	-0.0494197	-0.364984
UC Davis	Adam8	homozygote	male	24.15	27.9556	3.1	28.91	28.795	22.1075	5.89899	-0.115	1.84002	88.195	83.3628	NaN	NaN	NaN	NaN	NaN	0.945579	10.6667	-0.0684193	-0.365509
WTSI	Praf2	hemizygote	male	21.5	20.7333	3.4	29.4143	28.5857	22.4054	6.82133	-0.828571	2.00475	98.1656	83.4333	1344.06	2016	0.14746	0.0965986	2.09771	0.850897	11.4286	-0.0495441	-0.365903
WTSI	Zcchc14	heterozygote	male	21.5	20.8	3.4	27.4429	27.3429	21.7942	5.48828	-0.1	1.97018	94.5118	88.9819	1423.95	2108.61	0.214864	0.172789	3.05657	0.941332	12	-0.0495636	-0.366047
HMGU	Pkig	homozygote	male	24.4143	20.75	3.339	23.8571	22.1286	14.9085	5.83717	-1.72857	1.65324	80.3912	70.8061	NaN	NaN	0.0918367	NaN	1.28299	0.878445	10.8571	-0.0685854	-0.366396
HMGU	Ucp1	homozygote	male	24.5929	20.75	3.339	28.6571	27.1	18.0481	9.08187	-1.55714	1.7934	87.2432	76.6803	NaN	NaN	0.110204	NaN	1.53959	0.87874	10	-0.0687438	-0.367243
HMGU	Gbp2	homozygote	male	24.3071	20.75	3.339	27.0857	25.5	NaN	NaN	-1.58571	1.76697	86.6854	72.9558	NaN	NaN	0.0870748	NaN	1.21647	0.842209	10.5714	-0.0687838	-0.367456
MRC Harwell	Afmid	homozygote	male	19.1773	20.5455	NaN	24.9909	24.1482	18.8218	5.00872	-0.842727	2.14371	104.174	92.0497	3466.81	4715.45	NaN	NaN	NaN	0.883405	10.6364	-0.0497904	-0.367722
MRC Harwell	Hmox2	homozygote	male	20.325	21.8042	NaN	25.025	24.1967	19.0772	4.56785	-0.97	2.06645	100.263	89.2902	3112.96	4259.66	NaN	NaN	NaN	0.889848	10.625	-0.0498123	-0.367883
HMGU	Prc1	heterozygote	male	22.2063	20.75	3.339	25.7625	25.3875	15.8214	7.98544	-0.375	1.90453	92.308	82.6473	NaN	NaN	0.132738	NaN	1.8544	0.897123	10.375	-0.0690098	-0.368664
MRC Harwell	Pitx2	heterozygote	male	20.625	21.5333	NaN	25.55	NaN	20.2939	4.20833	NaN	2.02693	97.5453	90.4366	2333.54	3369.99	NaN	NaN	NaN	0.925823	10.25	-0.0500833	-0.369885
WTSI	Ldlrad4	homozygote	male	21	20.4286	3.4	27.3	26.9857	20.838	6.51139	-0.314286	1.93978	94.0719	83.9787	447.772	689.507	0.14288	3.72789	2.03255	0.895404	11.5714	-0.0502359	-0.371012
MRC Harwell	Kcnj14	homozygote	male	17.9875	21.9021	NaN	28.0625	26.6067	22.1587	5.92523	-1.02667	2.23017	107.554	98.6931	2671.77	3782.25	NaN	NaN	NaN	0.918031	10.75	-0.0504123	-0.372314
WTSI	Zfp266	homozygote	male	21	20.5714	3.4	30.3429	29.6	22.8033	7.24368	-0.742857	1.98966	96.3925	86.4892	290.96	461.595	0.159598	3.75034	2.27037	0.897678	11.4286	-0.0504854	-0.372855
HMGU	Rora	homozygote	male	24.5	20.75	3.339	25.4	25.1	NaN	NaN	-0.3	1.69462	82.5357	72.1071	NaN	NaN	0.109524	NaN	1.53009	0.873648	11	-0.0698721	-0.37327
WTSI	Myo10	homozygote	male	21.5	20.7556	3.4	28.4333	27.6	23.1675	5.31989	-0.833333	2.00184	97.5922	84.8457	1671.04	2467.66	0.157487	0.131746	2.24034	0.869115	11.6667	-0.0505417	-0.373271
UC Davis	Tbr1	heterozygote	male	24.15	26.6333	3.1	28.3625	28.45	20.6425	6.99903	0.0875	1.82075	87.2027	82.7348	NaN	NaN	NaN	NaN	NaN	0.949693	11	-0.0699299	-0.373579
UC Davis	Mmp23	homozygote	male	24.15	25.5	3.1	29.0933	29.215	21.9748	6.15347	0.121667	1.81165	87.2711	80.5246	406.899	808.891	0.105326	0.0554312	1.36612	0.92286	10	-0.0507761	-0.375002
MRC Harwell	Tpcn2	homozygote	male	19.4563	21	NaN	26.2875	25.5925	20.4767	4.2342	-0.695	2.12192	102.533	93.1906	2789.85	3896.52	NaN	NaN	NaN	0.907349	10.5	-0.0509999	-0.376654
UC Davis	Ptpdc1	homozygote	male	24.15	28.0905	3.1	29.1043	29.2557	20.2158	8.14789	0.151429	1.84402	89.496	79.5906	NaN	NaN	NaN	NaN	NaN	0.889887	11	-0.0707235	-0.377819
UC Davis	Cldn18	heterozygote	male	24.15	23.2333	3.1	27.77	28.15	NaN	NaN	0.38	1.78199	85.8629	79.133	343.881	711.262	0.0861905	0.0433333	1.11792	0.92162	10	-0.0512252	-0.378318
WTSI	Cgrrf1	homozygote	male	21	20.5714	3.4	26.8857	25.8857	NaN	NaN	-1	1.92811	93.4644	83.6221	409.766	618.244	0.163492	3.87007	2.32577	0.894805	11.5714	-0.0512265	-0.378328
MRC Harwell	Snap23	heterozygote	male	20.2375	21.5917	NaN	26.8375	26.1062	20.058	6.17372	-0.73125	2.07009	99.8591	91.519	2404.54	3350.97	NaN	NaN	NaN	0.917017	11.25	-0.0515539	-0.380746
UC Davis	Prkab1	homozygote	male	24.15	25.419	3.1	27.8343	28.8543	19.9119	7.25124	1.02	1.80202	85.9519	83.1437	NaN	NaN	NaN	NaN	NaN	0.967306	11	-0.0715296	-0.382125
HMGU	Pgs1	heterozygote	male	24.35	20.75	3.339	27.3857	25.8286	NaN	NaN	-1.55714	1.77016	86.881	72.9473	NaN	NaN	0.0904762	NaN	1.26399	0.837366	10.8571	-0.0716423	-0.382727
UC Davis	Ccdc39	heterozygote	male	24.15	27.9571	3.1	27.9343	28.2357	20.3705	6.51361	0.301429	1.80489	86.6116	81.4119	NaN	NaN	NaN	NaN	NaN	0.942499	10.8571	-0.0719082	-0.384148
WTSI	Fam71b	homozygote	male	21	21	3.4	28.0286	26.8429	21.6755	5.95499	-1.18571	1.94869	94.6295	83.9188	400.753	603.805	0.139694	3.9381	1.98723	0.886051	11.2857	-0.0521504	-0.385151
UC Davis	Kcnc2	homozygote	male	24.15	27.7667	3.1	28.8214	29.1571	20.9441	6.59523	0.335714	1.83328	87.4966	84.3946	NaN	NaN	NaN	NaN	NaN	0.96236	10.7143	-0.0722874	-0.386173
UC Davis	Gjc3	homozygote	male	24.15	28.3333	3.1	26.4786	26.6543	20.0398	5.54096	0.175714	1.75721	84.142	79.9101	NaN	NaN	NaN	NaN	NaN	0.950874	11	-0.0723648	-0.386587
UC Davis	Cd83	homozygote	male	24.15	27.6857	3.1	29.1171	29.38	21.2727	6.68384	0.262857	1.84277	88.9919	81.118	NaN	NaN	NaN	NaN	NaN	0.910555	10.8571	-0.0723843	-0.386691
TCP	Slc29a1	homozygote	male	26.1125	21.2208	3.1	22.0075	22.6975	17.6336	3.57886	0.69	1.62967	77.9478	74.4195	1037.62	2407.75	0.177857	NaN	2.30688	0.956102	10	-0.0523925	-0.386939
WTSI	Arid1b	heterozygote	male	21	21.7143	3.4	27	26.8	NaN	NaN	-0.2	1.92443	92.095	87.7071	311.072	499.017	0.198027	3.83878	2.81706	0.953504	11.4286	-0.0526199	-0.388619
UC Davis	Gpr84	homozygote	male	24.15	27.7667	3.1	30.1757	29.5943	20.9922	7.59943	-0.581429	1.87674	90.1215	84.4328	NaN	NaN	NaN	NaN	NaN	0.93782	11	-0.072754	-0.388666
ICS	Setx	homozygote	male	21	21	3.145	23.6	24.48	16.0398	2.39311	0.88	1.89194	90.745	85.4957	880.291	1380.17	0.251905	0.156667	3.31473	0.94041	10.8	-0.0526867	-0.389112
UC Davis	Rnase9	homozygote	male	24.15	27.2708	3.1	26.7525	26.7725	19.4031	6.34131	0.02	1.76553	84.9654	78.7741	NaN	NaN	NaN	NaN	NaN	0.928362	10.875	-0.0729285	-0.389598
UC Davis	Cacybp	heterozygote	male	24.15	27.4125	3.1	29.2112	29.5912	21.7904	6.35289	0.38	1.84528	88.8407	82.1976	NaN	NaN	NaN	NaN	NaN	0.924731	11	-0.0729343	-0.389629
HMGU	Hsf2bp	homozygote	male	22.5714	20.75	3.339	26.9	25.3429	NaN	NaN	-1.55714	1.90609	93.3673	79.2092	NaN	NaN	0.0816327	NaN	1.14044	0.848552	10.5714	-0.0729366	-0.389641
UC Davis	Dnm2	heterozygote	male	24.15	26.1375	3.1	29.6187	30.1088	22.4864	5.77232	0.49	1.85844	88.257	87.1228	NaN	NaN	NaN	NaN	NaN	0.98822	11	-0.0729841	-0.389895
WTSI	Ctr9	heterozygote	male	21	21.2857	3.4	28.0286	27.3429	20.3581	7.1955	-0.685714	1.95401	94.7088	84.7855	511.001	762.629	0.160272	3.96939	2.27997	0.897103	11.8571	-0.0528126	-0.390042
MRC Harwell	Pdss2	heterozygote	male	20.4563	21.8833	NaN	25.325	24.8475	19.7222	5.81321	-0.4775	2.02158	97.5919	89.1127	2156.66	3178.66	NaN	NaN	NaN	0.912496	11	-0.0528243	-0.390129
UC Davis	Parp11	homozygote	male	24.15	27.1292	3.1	29.5413	29.5925	21.5569	6.56939	0.05125	1.85575	89.0381	83.7587	NaN	NaN	NaN	NaN	NaN	0.940647	10.25	-0.0731596	-0.390833
TCP	Ptp4a1	homozygote	male	26.6375	21.6333	3.1	25.2725	23.95	19.3356	5.45042	-1.3225	1.66146	80.5258	72.1031	957.133	2331.64	NaN	NaN	NaN	0.893639	10.5	-0.0529564	-0.391104
TCP	Ampd1	homozygote	male	26.25	20.9	3.1	26.75	26.53	20.4805	6.22309	-0.22	1.71721	83.6536	73.0064	1000.78	2511.83	0.11381	NaN	1.47616	0.872722	10	-0.0529997	-0.391424
HMGU	Phactr2	homozygote	male	21.3	20.75	3.339	27.61	26.64	17.4017	7.32554	-0.97	2.03806	98.6845	88.781	NaN	NaN	0.132857	NaN	1.85606	0.900499	10.6	-0.0733553	-0.391878
UC Davis	Gpank1	homozygote	male	24.15	27.7667	3.1	27.1614	27.5	20.6671	4.65937	0.338571	1.77834	85.4663	79.757	NaN	NaN	NaN	NaN	NaN	0.930841	10.7143	-0.073385	-0.392037
UC Davis	Arl10	homozygote	male	24.15	26.5625	3.1	29.8137	30.1713	20.6952	8.90885	0.3575	1.86411	89.6897	83.2433	NaN	NaN	NaN	NaN	NaN	0.928181	10.25	-0.0736381	-0.393389
MRC Harwell	Hace1	homozygote	male	20.95	21.8167	NaN	24.5	21.94	17.9583	4.91081	-2.56	1.97999	95.7564	86.6667	2331.18	3207.33	NaN	NaN	NaN	0.905074	11	-0.0534437	-0.394703
HMGU	Slc44a3	homozygote	male	22.35	20.75	3.339	29.1222	28	20.778	6.425	-1.12222	1.99544	97.1481	85.0463	NaN	NaN	0.12381	NaN	1.72967	0.877188	10.8889	-0.0747052	-0.39909
HMGU	Cs	heterozygote	male	23.1438	20.75	3.339	26.775	25.6125	16.441	7.05287	-1.1625	1.85097	90.1503	78.7604	NaN	NaN	0.1125	NaN	1.57167	0.872313	10.75	-0.0747783	-0.39948
UC Davis	Dennd2c	homozygote	male	24.15	24.9	3.1	26.06	27.61	19.8087	5.30693	1.55	1.7399	83.0462	80.0727	228.714	549.393	0.0592857	0.0342857	0.768959	0.964195	11	-0.0542322	-0.400526
WTSI	Zfp719	homozygote	male	21	21.2143	3.4	28.8	28.05	21.5251	7.53801	-0.75	1.96481	95.6747	83.6773	478.629	693.782	0.166185	3.80578	2.36408	0.874773	11.6429	-0.0543061	-0.401072
UC Davis	Ddit3	homozygote	male	24.15	27.2	3.1	27.6071	28.0329	21.1354	6.41519	0.425714	1.79094	86.1295	80.116	NaN	NaN	NaN	NaN	NaN	0.931634	10.5714	-0.0752439	-0.401967
WTSI	Rab15	homozygote	male	21.5	20.9333	3.4	32.8333	31.9	23.8425	8.91362	-0.933333	2.06359	101.129	85.5875	1314.6	1958.75	0.165377	0.119841	2.35259	0.849834	12	-0.0545213	-0.402661
KMPC	Rnf10	homozygote	male	22	20	NaN	21.6733	21.8583	NaN	NaN	0.185	1.95419	93.2618	89.9799	1948.59	5481.56	0.178968	0.136508	NaN	0.964949	10.6667	-0.0547756	-0.404539
HMGU	Eea1	homozygote	male	21.95	20.6667	3.339	24.6	24	NaN	NaN	-0.6	1.8821	91.3968	81.0476	NaN	NaN	NaN	NaN	NaN	0.886766	10	-0.0757734	-0.404796
MRC Harwell	Nagk	homozygote	male	19.1071	21.8595	NaN	24.5286	23.38	18.2658	5.67917	-1.14857	2.0973	101.968	89.8833	2628.61	3755.2	NaN	NaN	NaN	0.880933	11	-0.0548319	-0.404955
WTSI	Coq4	heterozygote	male	21.5	21.1593	3.4	27.9667	27.0667	21.1232	7.30991	-0.9	1.96983	96.3723	82.2751	1311.92	1972.37	0.151887	0.125397	2.16069	0.853298	11.5556	-0.0548976	-0.40544
TCP	Grtp1	homozygote	male	26.6	21.319	3.1	25.1543	24.6986	19.984	4.55081	-0.455714	1.66169	80.3552	72.76	879.565	2401.29	0.143164	NaN	1.85689	0.904829	10.4286	-0.0550552	-0.406604
HMGU	Klk5	homozygote	male	24.45	20.75	3.339	27.3	26.2	16.6882	7.07142	-1.1	1.75428	84.7476	77.119	NaN	NaN	0.111429	NaN	1.5567	0.910113	10	-0.0761329	-0.406716
WTSI	Arpc3	heterozygote	male	21.5	21	3.4	27.6	26.9429	21.1817	5.99604	-0.657143	1.96787	96.2177	82.4034	1436.27	2116.18	0.165125	0.115646	2.349	0.856319	11.4286	-0.0551933	-0.407624
UC Davis	Klf14	homozygote	male	24.15	23.2333	3.1	29.2275	29.29	22.0553	6.06232	0.0625	1.81132	86.8962	81.7894	398.238	850.065	0.103631	0.0445238	1.34413	0.94108	10.75	-0.0552443	-0.408001
UC Davis	Vwa2	homozygote	male	24.15	32.0583	3.1	27.3637	27.7013	19.4694	6.74493	0.3375	1.78161	84.9432	82.3275	NaN	NaN	NaN	NaN	NaN	0.969563	10.5	-0.0766774	-0.409626
MRC Harwell	Nedd4l	homozygote	male	20.2667	21.5556	NaN	25.9	26.13	20.645	4.20644	0.08	2.09213	101.371	90.8915	3245.3	4568.93	NaN	NaN	NaN	0.896415	10	-0.0557475	-0.411717
HMGU	Lss	heterozygote	male	23.1938	20.75	3.339	29.3875	28	19.1325	6.72338	-1.3875	1.92908	94.1295	81.4628	NaN	NaN	0.10119	NaN	1.41367	0.865535	10.125	-0.077094	-0.411851
MARC	Ppp2r5d	homozygote	male	24	33.375	NaN	26.9	27.7571	20.9703	4.6962	0.857143	1.77887	85.0617	81.3138	NaN	NaN	NaN	NaN	NaN	0.955616	11	-0.0772746	-0.412816
UC Davis	Entpd8	homozygote	male	24.15	27.3619	3.1	29.1914	28.4971	21.2299	7.13944	-0.694286	1.84012	89.3863	79.139	NaN	NaN	NaN	NaN	NaN	0.884786	10.8571	-0.0774493	-0.413749
TCP	Plod1	homozygote	male	27.0125	21.3125	3.1	24.7175	23.4112	19.5814	4.74287	-1.30625	1.62806	79.0528	70.135	927.959	2337.87	0.137091	NaN	1.77813	0.88598	10.25	-0.0560357	-0.413846
WTSI	Klc2	homozygote	male	21.5	20.51	3.4	27.98	27.18	21.574	6.52629	-0.8	2.00838	97.998	84.8144	2176.74	3021.8	0.150635	0.132381	2.14287	0.867882	12	-0.0561117	-0.414407
WTSI	Arap2	homozygote	male	21	20.5714	3.4	30	28.9286	21.8558	7.68128	-1.07143	1.97756	95.8122	85.942	279.21	466.494	0.140748	3.59456	2.00223	0.897932	11.5714	-0.0561555	-0.414731
HMGU	Zfp69	heterozygote	male	22.15	20.75	3.339	22.5333	22.5333	NaN	NaN	0	1.79592	86.6825	79.2222	NaN	NaN	0.131746	NaN	1.84054	0.914217	10	-0.0777215	-0.415203
UC Davis	Chsy3	homozygote	male	24.15	25.075	3.1	23.8025	24.2525	18.6037	4.17899	0.45	1.66505	79.3897	76.9281	NaN	NaN	NaN	NaN	NaN	0.969465	10.375	-0.0777291	-0.415244
HMGU	Cap2	heterozygote	male	24.2857	20.75	3.339	26.3429	25.6286	NaN	NaN	-0.714286	1.73569	84.0204	75.6922	NaN	NaN	0.12449	NaN	1.73917	0.901898	10.7143	-0.0778132	-0.415693
HMGU	Abcb11	homozygote	male	24.25	20.75	3.339	27.75	26.4	NaN	NaN	-1.35	1.78429	86.4702	77.4643	NaN	NaN	0.135714	NaN	1.89598	0.896337	10	-0.0779288	-0.416311
UC Davis	Sh2d7	homozygote	male	24.15	27.281	3.1	27.3157	27.5057	20.5952	5.94139	0.19	1.77866	84.9641	81.6141	NaN	NaN	NaN	NaN	NaN	0.961866	10.7143	-0.0780752	-0.417093
UC Davis	Slc25a14	hemizygote	male	24.15	27.2	3.1	26.3943	26.6443	19.5598	6.35373	0.25	1.74873	83.6653	79.7746	NaN	NaN	NaN	NaN	NaN	0.954621	10	-0.0781185	-0.417324
MRC Harwell	Shmt1	homozygote	male	17.8062	21.7	NaN	27.15	26.9575	21.5123	3.97944	-0.1925	2.23185	107.505	99.2274	2929.82	4201.85	NaN	NaN	NaN	0.922156	11	-0.05652	-0.417423
HMGU	Chst5	homozygote	male	22.275	20.75	3.339	25.45	24.85	15.3817	6.5584	-0.6	1.87929	90.9107	82.1726	NaN	NaN	0.142857	NaN	1.99577	0.90279	10	-0.078198	-0.417749
WTSI	Kif18b	heterozygote	male	21	20.5714	3.4	30.9714	30.2	22.0626	8.52298	-0.771429	1.9983	96.5486	87.8005	340.045	533.927	0.14678	3.93741	2.08803	0.909257	11.4286	-0.0566965	-0.418726
HMGU	Pcx	heterozygote	male	24.5	20.75	3.339	29.2667	27.0222	NaN	NaN	-2.24444	1.8114	89.332	73.127	NaN	NaN	0.0587302	NaN	0.820482	0.818291	11	-0.0785003	-0.419364
MRC Harwell	Frrs1l	heterozygote	male	20.0625	21.4667	NaN	26.4375	26.3525	20.5232	5.16502	-2.4725	2.06153	100.25	88.2745	2255.25	3222.31	NaN	NaN	NaN	0.881898	10	-0.056815	-0.419602
TCP	Nek2	homozygote	male	27.2937	21.0375	3.1	27.5012	27.045	22.0151	4.74979	-0.45625	1.65881	79.7231	74.3903	780.199	2150.41	NaN	NaN	NaN	0.933125	10.125	-0.0570648	-0.421446
WTSI	Ocm	homozygote	male	21.5	20.8071	3.4	31.4857	30.5143	22.6744	8.73433	-0.971429	2.06659	100.613	88.0764	1984.51	2799.25	0.155964	0.121769	2.21868	0.876143	11.8571	-0.0571653	-0.422188
HMGU	Nubp2	heterozygote	male	22.1654	20.75	3.339	27.6308	26.9462	17.7722	7.3189	-0.684615	1.95805	95.4203	83.1236	NaN	NaN	0.117582	NaN	1.64267	0.871246	10.3077	-0.0795977	-0.425226
MRC Harwell	Aqp1	homozygote	male	20.7	21.675	NaN	26.73	25.905	22.09	4.03409	-0.825	2.01759	96.8631	90.8492	1772.89	2822.95	NaN	NaN	NaN	0.937865	10.5	-0.057625	-0.425583
KMPC	Krt26	homozygote	male	22	20	NaN	30.4943	30.0243	NaN	NaN	-0.47	2.07679	99.3856	94.6534	1497.99	4293.41	0.162653	0.0994558	NaN	0.95281	11	-0.0576388	-0.425685
HMGU	Vps13c	homozygote	male	24.1875	20.75	3.339	25.1	23.9625	NaN	NaN	-1.1375	1.70192	83.0655	71.7976	NaN	NaN	0.0988095	NaN	1.38041	0.863887	10.125	-0.0797178	-0.425868
UC Davis	Fpr1	homozygote	male	24.15	30.6	3.1	28.13	28.7263	20.9153	5.80187	0.59625	1.80335	86.2211	82.4715	NaN	NaN	NaN	NaN	NaN	0.956997	10	-0.0797917	-0.426263
WTSI	Rab5c	heterozygote	male	21.5	20.9857	3.4	29.7857	29.1429	23.6728	6.10887	-0.642857	2.01918	98.5157	85.3029	1695.45	2428.64	0.162245	0.167347	2.30803	0.865269	11	-0.057823	-0.427046
TCP	Polr3a	heterozygote	male	26.5714	21.581	3.1	27.7257	27.0514	22.8121	3.77775	-0.674286	1.69881	81.8005	75.6332	776.573	2103.47	NaN	NaN	NaN	0.924722	11	-0.0578435	-0.427197
WTSI	Aldh3b1	homozygote	male	21	20	3.4	32	31.1667	22.1205	9.34689	-0.833333	2.02183	99.0225	84.0694	422.81	662.397	0.159206	3.94921	2.26481	0.848799	12	-0.0578527	-0.427265
TCP	Nhs	hemizygote	male	22	21.45	3.1	30.245	29.415	24.1017	4.76503	-0.83	2.0565	99.6856	89.1991	NaN	NaN	NaN	NaN	NaN	0.894593	10.5	-0.0801693	-0.42828
WTSI	Ccl22	heterozygote	male	21.5	20.6952	3.4	30.4571	29.8857	22.7469	7.50355	-0.571429	2.02191	99.0267	84.0723	1488.2	2165.39	0.17356	0.15102	2.469	0.85086	11.1429	-0.0581354	-0.429353
WTSI	Cdkal1	homozygote	male	21.5	20.5143	3.4	26.9857	26.6714	21.5521	5.35817	-0.314286	1.95264	93.9794	87.0884	1414	2107.55	0.178526	0.17415	2.53964	0.925744	11	-0.0582435	-0.430151
UC Davis	Atg9b	homozygote	male	24.15	23.2333	3.1	27.0833	27.2733	21.5296	4.94688	0.19	1.76973	84.7797	80.343	489.333	930.976	0.0910317	0.0595079	1.18072	0.948704	11	-0.058511	-0.432127
TCP	Mrgprx1	homozygote	male	26.5188	21.6333	3.1	26.8262	25.5287	21.7513	4.34584	-1.2975	1.68866	81.3243	75.1366	818.725	2240.44	NaN	NaN	NaN	0.924383	10.375	-0.0585816	-0.432648
WTSI	Exoc3l2	heterozygote	male	21	20.5714	3.4	30.2714	29.4	22.2518	8.38887	-0.871429	1.98864	96.4944	85.9062	462.791	687.851	0.155841	3.82449	2.21694	0.891299	11.4286	-0.0586444	-0.433112
TCP	G6pd2	homozygote	male	26.5	21.5875	3.1	25.7862	25.495	20.5567	4.75028	-0.29125	1.69441	81.2818	76.531	1150.41	2901.89	NaN	NaN	NaN	0.9417	10.125	-0.0586616	-0.433239
WTSI	Gm12253	homozygote	male	21	20.7143	3.4	29.5143	28.5429	22.2134	6.64103	-0.971429	1.96831	95.1851	86.1782	337.977	536.496	0.142925	3.88707	2.0332	0.905264	11.5714	-0.0586674	-0.433282
UC Davis	Cdan1	heterozygote	male	24.15	23.2333	3.1	27.0333	27.5433	20.2766	6.0989	0.51	1.75881	84.3399	79.5508	303.056	673.079	0.0996825	0.0557381	1.29292	0.943491	10	-0.0587528	-0.433913
MRC Harwell	Frrs1l	homozygote	male	19.8286	21	NaN	24.0714	22.8114	19.2965	4.6835	-1.26	2.15625	104.922	92.096	4874	6673.02	NaN	NaN	NaN	0.877897	10	-0.0587531	-0.433915
UC Davis	Tmem173	homozygote	male	24.15	27.8476	3.1	30.7443	30.8371	21.9465	7.96702	0.0928571	1.88661	90.4124	85.5288	NaN	NaN	NaN	NaN	NaN	0.946374	10.7143	-0.0813262	-0.43446
UC Davis	2510002D24Rik	homozygote	male	24.15	28.4042	3.1	27.1788	27.8712	20.434	5.69899	0.6925	1.77068	85.4038	78.3237	NaN	NaN	NaN	NaN	NaN	0.918118	11	-0.0816097	-0.435975
WTSI	Arsg	homozygote	male	21.5	20.5306	3.4	29.8833	28.9833	23.49	6.10154	-0.9	2.00441	98.419	82.4551	1381.87	2025.26	0.161323	0.122222	2.29491	0.840641	11.5	-0.0592919	-0.437894
WTSI	Cyp2b13	homozygote	male	21	20.5714	3.4	29.5429	28.6714	21.1241	8.33938	-0.871429	1.96813	95.3302	85.6216	351.627	537.914	0.157347	3.91701	2.23835	0.898595	11.7143	-0.0594545	-0.439095
WTSI	Fbxw26	homozygote	male	21.2143	20.5857	3.4	29.1857	28.1714	21.5542	7.4429	-1.01429	1.96605	96.339	81.5783	623.982	967.957	0.144082	2.46531	2.04965	0.846923	11	-0.0594936	-0.439384
UC Davis	Cd300e	homozygote	male	24.15	27.8476	3.1	27.2671	27.09	NaN	NaN	-0.177143	1.77284	84.8033	80.9311	NaN	NaN	NaN	NaN	NaN	0.95391	10.8571	-0.0823118	-0.439725
HMGU	Sspn	homozygote	male	22.16	20.75	3.339	25.17	24.83	16.8575	5.82148	-0.34	1.87593	90.8083	81.8107	NaN	NaN	0.133333	NaN	1.86272	0.900701	10.6	-0.0823708	-0.440041
MRC Harwell	Pard3	heterozygote	male	20.375	22.1375	NaN	24.4625	24.2312	18.438	4.35792	-0.23125	2.01309	97.38	88.0347	2439.19	3463.2	NaN	NaN	NaN	0.904543	10	-0.0596786	-0.44075
HMGU	Fdx1	heterozygote	male	23.495	20.75	3.339	24.82	24.23	15.2445	6.17653	-0.59	1.74956	84.8714	75.656	NaN	NaN	0.118571	NaN	1.65649	0.891307	10.3	-0.0825671	-0.441089
MRC Harwell	Atp5md	homozygote	male	20.4	22	NaN	23.6714	23.01	18.339	3.8163	-0.661429	2.03738	98.1624	90.4954	3332.41	4550.26	NaN	NaN	NaN	0.923158	10.4286	-0.0597337	-0.441157
WTSI	Fbxo33	homozygote	male	21	21	3.4	26.5571	25.4714	20.1136	5.94285	-1.08571	1.92812	93.7858	82.4792	710.427	1015.28	0.128549	3.90884	1.82868	0.880624	11.1429	-0.0598246	-0.441828
UC Davis	Rp9	homozygote	male	24.15	27.7667	3.1	26.2833	26.6067	19.4214	6.1354	0.323333	1.7403	83.1247	79.8792	NaN	NaN	NaN	NaN	NaN	0.960143	10.6667	-0.0829489	-0.443129
UC Davis	Ivl	homozygote	male	24.15	27.5778	3.1	28.075	28.2917	21.6258	5.1658	0.216667	1.79828	86.4861	80.432	NaN	NaN	NaN	NaN	NaN	0.929665	10.8333	-0.0830765	-0.443811
UC Davis	Cfb	homozygote	male	24.15	28.3333	3.1	28.53	28.03	21.3333	6.4342	-0.5	1.81264	86.8011	82.4117	NaN	NaN	NaN	NaN	NaN	0.948111	11	-0.0834788	-0.44596
TCP	Cox4i1	heterozygote	male	26.4937	21.7708	3.1	24.8538	24.895	19.2571	4.86044	0.04125	1.64284	79.1097	73.1252	786.677	2050.63	0.161629	NaN	2.09639	0.924819	10.25	-0.0605231	-0.446987
KMPC	Phgdh	heterozygote	male	22	20	NaN	29.5657	29.0143	20.7586	8.13918	-0.551429	2.12414	102.049	95.3948	2243.48	6103.56	0.157959	0.113878	NaN	0.934165	10.8571	-0.0605345	-0.447071
UC Davis	Blk	homozygote	male	24.15	26.9167	3.1	27.63	28.5287	19.6145	6.67896	0.89875	1.78324	85.7949	79.6439	NaN	NaN	NaN	NaN	NaN	0.928997	10.75	-0.0836873	-0.447074
WTSI	Sel1l	heterozygote	male	21.5	20.9857	3.4	28.7857	27.7	22.3108	6.21486	-1.08571	1.97056	96.4173	82.2746	1128.25	1723.73	0.149048	0.117007	2.12029	0.854779	11.1429	-0.0606007	-0.44756
UC Davis	Nxn	heterozygote	male	24.15	27.4429	3.1	28.4229	27.8486	21.0367	6.15609	-0.574286	1.8087	86.9429	81.0551	NaN	NaN	NaN	NaN	NaN	0.930429	10.7143	-0.0839426	-0.448437
HMGU	Rpl32	homozygote	male	22.3357	20.75	3.339	25.8143	24.5143	20.0973	3.02745	-1.3	1.88012	91.1378	81.5425	NaN	NaN	0.119048	NaN	1.66314	0.895969	11	-0.0839632	-0.448548
WTSI	Slc1a4	homozygote	male	21.5	21.031	3.4	28.8	27.5143	23.1532	5.61456	-1.28571	1.96735	96.2075	82.3285	1051.03	1642.64	0.162364	0.121088	2.30972	0.855239	11.4286	-0.0610326	-0.45075
TCP	Pnn	heterozygote	male	26.3062	21.0375	3.1	27.25	27.305	21.2881	6.7857	0.055	1.70012	81.6855	76.3247	797.219	2097.6	0.151333	NaN	1.96285	0.935263	10.375	-0.061171	-0.451772
TCP	Raly	homozygote	male	26.2688	21.2208	3.1	29.1837	28.2063	22.0523	6.63578	-0.9775	1.7289	83.4836	76.1377	617.412	1823.58	NaN	NaN	NaN	0.912927	10.75	-0.0613662	-0.453214
UC Davis	Cpa3	homozygote	male	24.15	28.3333	3.1	27.9462	28.0463	NaN	NaN	0.1	1.79221	86.0644	80.6228	NaN	NaN	NaN	NaN	NaN	0.935993	10.5	-0.0849716	-0.453935
HMGU	Msh5	homozygote	male	22.4	20.75	3.339	25.1818	24.7727	18.7423	4.01037	-0.409091	1.85298	89.6948	80.8193	NaN	NaN	0.14329	NaN	2.00182	0.90265	10.4545	-0.08506	-0.454407
WTSI	Rhox13	hemizygote	male	21	20.5333	3.4	28.88	28.1533	23.0265	6.31986	-0.726667	1.96056	95.1763	84.534	500.061	733.677	0.161717	3.86317	2.30052	0.888871	11.6	-0.0616059	-0.454984
UC Davis	Prelp	homozygote	male	24.15	26.0667	3.1	28.144	28.148	21.1671	5.53975	0.004	1.79836	86.261	81.2518	NaN	NaN	NaN	NaN	NaN	0.942223	10.2	-0.0852328	-0.45533
UC Davis	C9orf72	heterozygote	male	24.15	28.9	3.1	30.5	30.87	21.5284	7.77925	0.37	1.87475	89.961	84.5751	NaN	NaN	NaN	NaN	NaN	0.94013	10	-0.0852587	-0.455468
HMGU	Smim6	homozygote	male	22.3375	20.75	3.339	26.0125	25.7125	19.1646	4.12326	-0.3	1.88502	90.9122	83.4048	NaN	NaN	0.138095	NaN	1.92924	0.917594	10.375	-0.0853402	-0.455904
UC Davis	5430419D17Rik	homozygote	male	24.15	25.5	3.1	29.8714	29.9286	20.9126	7.79319	0.0571429	1.85418	89.2379	82.7059	NaN	NaN	NaN	NaN	NaN	0.926775	10.7143	-0.0854453	-0.456465
HMGU	Aif1	homozygote	male	24.09	20.75	3.339	25.66	25.06	15.5973	6.37972	-0.6	1.72265	83.4333	74.9667	NaN	NaN	0.120952	NaN	1.68975	0.898544	10.8	-0.0855368	-0.456954
KMPC	Tm4sf5	homozygote	male	22	20	NaN	28.5886	28.22	20.1906	7.90424	-0.368571	2.0599	98.1197	95.5134	1772.01	4940.89	0.164558	0.104762	NaN	0.974388	10.7143	-0.0621407	-0.458933
WTSI	Syt1	heterozygote	male	21.5	20.5	3.4	30.0143	29.3	21.4272	8.64578	-0.714286	1.99877	98.1959	82.0312	1244.38	1885.72	0.158163	0.112245	2.24997	0.834701	12	-0.0622046	-0.459405
MRC Harwell	Fgf7	homozygote	male	20.075	22.4833	NaN	23.8375	23.3025	18.9884	3.82451	-0.535	2.03656	98.3142	89.776	2905.97	4054.37	NaN	NaN	NaN	0.912837	10	-0.0622893	-0.460031
UC Davis	Clca1	homozygote	male	24.15	26.0667	3.1	29.0075	29.7499	20.6954	7.61028	0.742375	1.82534	86.7979	85.1687	NaN	NaN	NaN	NaN	NaN	0.981712	10.375	-0.0862615	-0.460826
UC Davis	Ppbp	homozygote	male	24.15	28.9	3.1	26.8214	26.91	21.2812	4.29407	0.0885714	1.75396	84.246	78.8358	NaN	NaN	NaN	NaN	NaN	0.935625	11	-0.0867423	-0.463394
ICS	Casq1	homozygote	male	21	21	3.145	22.8	23.55	15.3043	1.9538	0.75	1.86954	89.8205	83.9503	937.631	1464.39	0.214643	0.159365	2.82442	0.934808	11	-0.0628165	-0.463925
HMGU	Sarnp	heterozygote	male	24.2	20.75	3.339	26.7857	26.2429	16.5347	6.52456	-0.542857	1.74833	84.665	76.1259	NaN	NaN	0.131293	NaN	1.83421	0.900219	10.1429	-0.0869145	-0.464314
HMGU	Aldh1l1	homozygote	male	24.3	20.75	3.339	24.5625	23.675	15.3684	6.31591	-0.8875	1.6676	81.1071	71.3586	NaN	NaN	0.114286	NaN	1.59661	0.880123	10.375	-0.0869305	-0.464399
HMGU	Zfp61	homozygote	male	22.05	20.6667	3.339	26.8	25.1444	15.9305	8.28145	-1.65556	1.93326	94.4286	81.2998	NaN	NaN	0.0846561	NaN	1.18268	0.859398	10.3333	-0.0873697	-0.466746
HMGU	Pdia6	heterozygote	male	22.8125	20.75	3.339	26.7125	26.275	15.8922	7.42801	-0.4375	1.86463	90.2128	81.4896	NaN	NaN	0.132738	NaN	1.8544	0.902993	10.75	-0.0875832	-0.467886
WTSI	Ccdc134	heterozygote	male	21.5	20.5389	3.4	28.9	28.5833	23.8203	5.07397	-0.316667	1.967	95.7839	83.7613	1064.59	1643.88	0.16004	0.140476	2.27666	0.87337	11.5	-0.0633633	-0.467963
WTSI	Mir96	heterozygote	male	21	20	3.4	29.7667	29.1667	23.2587	6.82383	-0.6	1.96873	93.5897	91.9527	339.73	545.286	0.193651	4.53968	2.7548	0.981451	12	-0.063453	-0.468625
UC Davis	Dnase1	homozygote	male	24.15	27.119	3.1	27.4314	27.5343	20.2632	6.407	0.102857	1.77267	84.6482	81.4457	NaN	NaN	NaN	NaN	NaN	0.964317	11	-0.0878164	-0.469132
WTSI	Tnik	homozygote	male	21.5	20.5333	3.4	24.2222	24.0444	19.6442	4.59579	-0.177778	1.95166	95.8801	80.1027	2750.95	3640.75	0.167222	0.136508	2.37884	0.836101	11.4444	-0.0636362	-0.469978
UC Davis	Gpr39	homozygote	male	24.15	26.3095	3.1	28.0614	28.2557	20.9848	5.99555	0.194286	1.79292	85.5489	82.6122	NaN	NaN	NaN	NaN	NaN	0.96594	10	-0.0880011	-0.470119
UC Davis	Cldn18	homozygote	male	24.15	28.3333	3.1	27.395	27.6133	NaN	NaN	0.218333	1.7712	85.5091	78.061	NaN	NaN	NaN	NaN	NaN	0.91323	10	-0.0881031	-0.470664
UC Davis	Txk	homozygote	male	24.15	24.7444	3.1	25.93	26.4733	19.3036	5.81121	0.543333	1.7236	82.7108	77.7469	NaN	NaN	NaN	NaN	NaN	0.939948	10.3333	-0.0881822	-0.471087
UC Davis	Adipoq	homozygote	male	24.15	26.6333	3.1	30.8557	31.4929	22.18	7.44557	0.637143	1.88316	90.2873	85.2301	NaN	NaN	NaN	NaN	NaN	0.943796	11	-0.0883851	-0.47217
HMGU	Cenpe	heterozygote	male	24.5	20.75	3.339	29.54	27.7	NaN	NaN	-1.84	1.81001	88.7905	74.7548	NaN	NaN	0.0685714	NaN	0.957969	0.843933	11	-0.0887626	-0.474187
TCP	L3mbtl3	heterozygote	male	26.4625	21.6792	3.1	27.2575	26.91	21.6606	5.88058	-0.3475	1.73213	83.4798	76.8487	1271.63	3244.71	NaN	NaN	NaN	0.921056	11	-0.064229	-0.474357
TCP	Dcc	heterozygote	male	26.2562	21.6792	3.1	25.3525	25.1462	20.1657	5.15547	-0.20625	1.65955	80.2624	72.6285	778.559	2008.39	0.142273	NaN	1.84533	0.905327	10	-0.0644137	-0.475721
WTSI	Sgms1	homozygote	male	21.5	21.2881	3.4	26.4143	26.1714	21.8899	3.57889	-0.242857	1.94303	94.178	84.3037	1574.53	2311.76	0.176463	0.140816	2.51029	0.895888	11.7143	-0.064517	-0.476484
TCP	Sh3gl2	homozygote	male	26.7375	21.3583	3.1	23.055	23.62	17.8267	4.19638	0.565	1.588	76.1135	71.9517	721.445	1966.22	0.158985	NaN	2.0621	0.945548	10.75	-0.0645736	-0.476901
MRC Harwell	Slit1	homozygote	male	20.65	21.7	NaN	26.475	25.5625	18.9484	5.446	-0.9125	2.03901	98.6316	89.1742	2565.96	3641.55	NaN	NaN	NaN	0.90487	10.75	-0.0647623	-0.478295
WTSI	Traf2	heterozygote	male	21.5	21.0286	3.4	28.2429	27.3857	23.2017	5.20019	-0.857143	1.964	95.9563	82.4986	1311.57	1939.54	0.159388	0.113605	2.26739	0.860181	11.4286	-0.0648165	-0.478695
ICS	Med25	heterozygote	male	21	21	3.145	25.15	25.775	17.1254	2.83606	0.625	1.89921	91.4432	84.5795	682.841	1104.09	0.226429	0.134167	2.9795	0.924298	11.25	-0.0649261	-0.479505
HMGU	Ankrd10	heterozygote	male	22.57	20.75	3.339	28.59	26.74	20.2497	5.78992	-1.85	1.94411	95.1571	81.0476	NaN	NaN	0.0904762	NaN	1.26399	0.851587	10.8	-0.0898539	-0.480017
BCM	Cubn	heterozygote	male	22.75	21.2333	3.1	24.48	24.16	17.744	3.25539	-0.32	1.79527	86.2811	80.5123	NaN	NaN	NaN	NaN	NaN	0.934176	10.6	-0.0899016	-0.480272
UC Davis	Aard	homozygote	male	24.15	27.7667	3.1	27.7237	27.3987	20.9056	6.39376	-0.325	1.78006	86.561	76.2273	NaN	NaN	NaN	NaN	NaN	0.878364	10.375	-0.0899063	-0.480297
UC Davis	Klhl8	homozygote	male	24.15	26.8762	3.1	31.2343	31.5829	22.7744	6.69612	0.348571	1.89374	90.9364	85.2035	NaN	NaN	NaN	NaN	NaN	0.937099	12	-0.0900852	-0.481252
UC Davis	Slc41a1	homozygote	male	24.15	27.2708	3.1	27.9787	28.3762	20.0508	7.17517	0.3975	1.78806	85.8745	80.4034	NaN	NaN	NaN	NaN	NaN	0.937134	10.5	-0.0901725	-0.481719
HMGU	Lonp1	heterozygote	male	22.35	20.75	3.339	30.5375	29.375	17.6715	10.277	-1.1625	2.02576	98.567	86.5417	NaN	NaN	0.119643	NaN	1.67146	0.87792	10	-0.0902939	-0.482368
WTSI	Orc3	heterozygote	male	21.5	20.8905	3.4	30.8143	30.0286	23.2433	7.42035	-0.785714	2.03457	99.5859	84.8157	1767.46	2513.02	0.152404	0.120408	2.16803	0.852315	11.8571	-0.0654547	-0.483409
TCP	Pebp1	homozygote	male	26.0125	21.9083	3.1	27.925	27.2662	22.3588	5.32392	-0.65875	1.73956	83.7591	77.4587	931.51	2500.43	NaN	NaN	NaN	0.925359	10.625	-0.0654673	-0.483502
WTSI	Rbm47	homozygote	male	21.5	20.85	3.4	30.1667	28.7667	23.0649	7.44259	-1.4	2.00433	98.2262	83.1264	1390.89	2048.72	0.132619	0.103175	1.88659	0.845977	11	-0.0657148	-0.48533
MRC Harwell	Sema3f	homozygote	male	20.355	20.85	NaN	23.09	21.409	18.3611	3.7635	-1.681	2.02194	97.9429	87.9411	3241.64	4535.81	NaN	NaN	NaN	0.897983	10.3	-0.0657915	-0.485896
TCP	Crip3	homozygote	male	26.6375	21.5875	3.1	28.5437	27.8525	22.132	5.49959	-0.69125	1.71444	82.8383	75.3133	901.72	2403.35	NaN	NaN	NaN	0.911156	10.25	-0.0657915	-0.485896
MRC Harwell	Kcnb1	homozygote	male	20.7857	21.3881	NaN	25.8	25.1386	20.1741	4.05403	-0.661429	2.19021	106.425	94.0809	6300.6	8223.27	NaN	NaN	NaN	0.888556	11	-0.065869	-0.486469
UC Davis	Klk4	homozygote	male	24.15	27.2	3.1	28.2129	28.4657	21.3204	5.61751	0.252857	1.79462	85.838	81.9499	NaN	NaN	NaN	NaN	NaN	0.955419	11	-0.0912114	-0.487269
UC Davis	Coro1a	homozygote	male	24.15	24.5167	3.1	25.8175	26.39	19.7904	5.07271	0.5725	1.71692	80.5098	84.1461	NaN	NaN	NaN	NaN	NaN	1.06627	10.75	-0.0912131	-0.487278
HMGU	Smc6	heterozygote	male	21.6	20.75	3.339	27.675	26.725	19.6023	5.30231	-0.95	1.99644	97.256	84.878	NaN	NaN	0.116667	NaN	1.62988	0.873048	10	-0.0912766	-0.487617
WTSI	Pdk3	hemizygote	male	21.5	21.0389	3.4	30.5	29.65	24.1396	6.27247	-0.85	2.01261	97.9802	85.7921	1377.38	2108.25	0.152889	0.135714	2.17494	0.875337	11.1667	-0.0661087	-0.488239
TCP	Idh1	homozygote	male	27.025	21.3583	3.1	23.7613	23.2075	18.9495	3.86049	-0.55375	1.6188	78.2858	70.8672	1239.42	2868.94	0.12746	NaN	1.65321	0.906196	10.25	-0.0661771	-0.488744
UC Davis	Calcb	heterozygote	male	24.15	26.6333	3.1	27.4333	26.29	NaN	NaN	-1.14333	1.76897	84.7316	80.35	NaN	NaN	NaN	NaN	NaN	0.948883	11	-0.0915734	-0.489203
UC Davis	Nr1h3	homozygote	male	24.15	23.2333	3.1	26.485	26.52	NaN	NaN	0.035	1.74071	83.4019	78.9799	303.952	675.595	0.090119	0.0627262	1.16888	0.946863	11	-0.066376	-0.490213
UC Davis	Evi2b	homozygote	male	24.15	28.6667	3.1	28.1617	28.38	20.2644	7.18586	0.218333	1.79234	86.1348	80.3994	NaN	NaN	NaN	NaN	NaN	0.935779	10.8333	-0.0918309	-0.490579
WTSI	Rufy2	homozygote	male	21.5	20.8167	3.4	29.1571	28.2857	21.6565	7.38768	-0.871429	1.99783	97.9678	82.6414	1648.69	2412.3	0.155578	0.133333	2.21319	0.845139	11.2857	-0.0664305	-0.490616
UC Davis	Calhm1	homozygote	male	24.15	27.2	3.1	27.0586	27.2757	20.6998	5.42303	0.217143	1.75649	84.3731	78.9308	NaN	NaN	NaN	NaN	NaN	0.936575	11	-0.0918983	-0.490938
HMGU	Yae1d1	heterozygote	male	24.83	20.75	3.339	23.76	23.3	14.878	5.89035	-0.46	1.59095	76.931	69.6762	NaN	NaN	0.104762	NaN	1.46356	0.906524	10	-0.0919624	-0.491281
UC Davis	Oas1g	heterozygote	male	24.15	27.119	3.1	27.68	27.4086	20.1521	6.93228	-0.271429	1.77608	85.4753	79.2361	NaN	NaN	NaN	NaN	NaN	0.927566	11	-0.092467	-0.493977
TCP	Itm2c	homozygote	male	26.0929	21.581	3.1	27.18	25.5314	21.8349	4.86381	-1.64857	1.69375	81.7542	74.7034	649.855	1818.13	NaN	NaN	NaN	0.912398	11	-0.0669589	-0.494518
HMGU	Cog3	heterozygote	male	24.15	20.75	3.339	26.025	24.55	NaN	NaN	-1.475	1.72208	84.1741	72.2039	NaN	NaN	0.104762	NaN	1.46356	0.856725	10.375	-0.0927847	-0.495674
HMGU	Ly6g6d	homozygote	male	21.6	20.6667	3.339	27.3714	26.6571	16.222	8.67666	-0.714286	1.98509	95.5964	88.3379	NaN	NaN	0.157823	NaN	2.20485	0.922509	10.8571	-0.0927849	-0.495675
TCP	Cdc7	heterozygote	male	26.2	22	3.1	26.9913	26.5663	20.9576	6.34779	-0.425	1.71499	83.032	74.7414	994.357	2634.51	NaN	NaN	NaN	0.900057	10.75	-0.0671416	-0.495867
HMGU	Decr2	homozygote	male	22.0333	20.75	3.339	26.6333	25.1667	18.0345	4.96399	-1.46667	1.92381	93.2447	83.4762	NaN	NaN	0.119577	NaN	1.67053	0.896154	10.3333	-0.0928473	-0.496008
TCP	Zfp451	homozygote	male	27.5286	21.3714	3.1	28.1729	27.0014	21.791	5.42809	-1.17143	1.6813	81.4682	73.0323	1211.77	3003.51	NaN	NaN	NaN	0.898743	10.7143	-0.0672279	-0.496505
UC Davis	Ccr6	homozygote	male	24.15	29.325	3.1	26.8938	26.63	NaN	NaN	-0.26375	1.74974	83.5828	80.2878	NaN	NaN	NaN	NaN	NaN	0.960876	10.875	-0.0933036	-0.498446
MRC Harwell	Nsd3	heterozygote	male	17.9125	21.2563	NaN	26.925	25.9025	20.9604	5.6165	-1.0225	2.20068	105.79	98.6033	2787.05	3930.85	NaN	NaN	NaN	0.932353	10.75	-0.0675171	-0.49864
TCP	Fgfr1	heterozygote	male	27.4917	21.2056	3.1	26.4767	26.955	19.9442	5.94602	0.478333	1.65303	78.9269	75.9781	1157.38	3078.14	0.205	NaN	2.65893	0.962513	11	-0.0675336	-0.498762
UC Davis	Vrk3	homozygote	male	24.15	27.0583	3.1	27.11	27.6687	NaN	NaN	0.55875	1.75647	83.5981	81.6865	NaN	NaN	NaN	NaN	NaN	0.977891	10.25	-0.0935932	-0.499993
UC Davis	Apom	heterozygote	male	24.15	27.7667	3.1	30.1	31.03	22.1862	7.52216	0.93	1.85328	87.4676	88.8188	NaN	NaN	NaN	NaN	NaN	1.01545	11	-0.093762	-0.500894
WTSI	Polr3f	heterozygote	male	21.5	20.9365	3.4	26.08	25.44	NaN	NaN	-0.64	1.94784	94.4264	84.4573	1870.79	2699.32	0.166857	0.14	2.37364	0.895754	12	-0.0678534	-0.501124
MRC Harwell	Usp38	homozygote	male	19.4062	20.8417	NaN	26.4625	25.2575	18.0982	7.02915	-1.205	2.11632	103.184	89.6593	2839.92	4038.56	NaN	NaN	NaN	0.86859	10.125	-0.0679673	-0.501965
WTSI	Actn4	heterozygote	male	21.5	20.7528	3.4	29.3667	28.3167	22.9863	6.48632	-1.05	2.00064	98.4589	81.4993	1695.85	2422.6	0.137565	0.111905	1.95694	0.82809	11.1667	-0.0680473	-0.502556
UC Davis	Ick	homozygote	male	24.15	28.2818	3.1	27.1818	27.5109	20.2903	5.93953	0.329091	1.75826	84.4275	79.1182	NaN	NaN	NaN	NaN	NaN	0.937648	11	-0.0941318	-0.50287
ICS	Fpr3	homozygote	male	21	21	3.145	24.5429	25.0714	16.6644	2.77738	0.528571	1.88426	91.4351	81.3766	688.766	1110.08	0.223129	0.120884	2.93609	0.888554	9	-0.0683917	-0.5051
UC Davis	Kcna10	heterozygote	male	24.15	26.775	3.1	25.855	26.3562	17.8938	7.0164	0.50125	1.71451	81.7145	79.3308	NaN	NaN	NaN	NaN	NaN	0.971724	10.625	-0.0948472	-0.506692
TCP	Serpinb3d	homozygote	male	26.5437	21.3583	3.1	25.4812	25.1587	20.2813	4.43234	-0.3225	1.66775	80.3077	74.2406	1099.64	2676.21	NaN	NaN	NaN	0.924264	10.5	-0.0686244	-0.506818
UC Davis	Abhd11	homozygote	male	24.15	26.3905	3.1	26.8986	27.3457	19.2195	6.83815	0.447143	1.74824	83.5045	80.2431	NaN	NaN	NaN	NaN	NaN	0.961194	10	-0.0949578	-0.507283
UC Davis	Sgtb	homozygote	male	24.15	27.0583	3.1	27.5	27.635	20.1138	6.32424	0.135	1.76743	84.1579	82.0613	NaN	NaN	NaN	NaN	NaN	0.975484	10.125	-0.0952776	-0.508991
MRC Harwell	Ap3s2	homozygote	male	19.5643	20.5	NaN	24.2714	23.5471	19.6893	3.03931	-0.724286	2.08675	100.816	91.7083	3335.81	4626.86	NaN	NaN	NaN	0.90876	10.2857	-0.0690442	-0.509919
HMGU	Entpd1	heterozygote	male	24.05	20.75	3.339	26.5429	24.9	NaN	NaN	-1.64286	1.74456	85.1956	73.4218	NaN	NaN	0.0829932	NaN	1.15945	0.861163	11	-0.0957033	-0.511266
UC Davis	Cox15	heterozygote	male	24.15	28.3267	3.1	27.054	28.14	20.4936	5.48052	1.086	1.75234	83.8283	79.9742	NaN	NaN	NaN	NaN	NaN	0.954361	10.8	-0.0959045	-0.51234
WTSI	4930449E01Rik	homozygote	male	21.5	22.3333	3.4	29.4714	28.6714	22.2841	7.46297	-0.8	1.98477	96.7689	84.0924	1317.49	1985.07	0.168299	0.159864	2.39416	0.869117	11.2857	-0.0694616	-0.513001
WTSI	Col4a3bp	heterozygote	male	21.5	20.8	3.4	27.9	27.575	22.8087	4.80912	-0.325	1.96071	95.4943	83.4348	1474.92	2153.74	0.175873	0.141667	2.5019	0.873604	12	-0.0695516	-0.513666
WTSI	Cep250	homozygote	male	21	21	3.4	28.9714	27.8857	21.4365	7.13262	-1.08571	1.94857	95.3812	81.2131	374.39	580.071	0.119683	3.85782	1.70256	0.852381	11.7143	-0.0695756	-0.513843
HMGU	Galk2	homozygote	male	22.3167	20.75	3.339	23.05	22.35	14.2753	5.29637	-0.7	1.77967	86.3909	76.75	NaN	NaN	0.13254	NaN	1.85163	0.890009	10.5	-0.0963932	-0.514951
HMGU	Fam216a	homozygote	male	24.01	20.75	3.339	26.24	25.5	NaN	NaN	-0.74	1.73747	84.6071	73.9857	NaN	NaN	0.119048	NaN	1.66314	0.872939	10.6	-0.0964141	-0.515062
WTSI	Mybphl	homozygote	male	21	20.8571	3.4	29.3429	28.9571	22.1443	6.7064	-0.385714	1.96022	95.1607	84.5174	482.501	704.599	0.177574	4.04422	2.52609	0.888432	11.7143	-0.0697766	-0.515328
TCP	Itpr1	heterozygote	male	26.4643	21.9476	3.1	27.0643	26.4386	21.15	5.43159	-0.625714	1.67951	81.202	73.5953	776.862	2097.51	NaN	NaN	NaN	0.907155	10.2857	-0.0698248	-0.515683
TCP	Poc5	homozygote	male	26.875	21.6333	3.1	27.2013	25.745	21.9392	4.97666	-1.45625	1.66527	80.979	71.3116	855.107	2226.33	NaN	NaN	NaN	0.880088	10.75	-0.0698305	-0.515726
UC Davis	Pou2af1	homozygote	male	24.15	28.1208	3.1	26.83	27.1025	19.6892	6.51999	0.2725	1.74442	83.5532	79.2428	NaN	NaN	NaN	NaN	NaN	0.949534	10.75	-0.0965604	-0.515844
MRC Harwell	Ngfr	homozygote	male	20.55	21.6762	NaN	23.6429	22.9357	18.8729	3.33759	-0.707143	2.00502	97.0263	87.5495	3008.22	4184.94	NaN	NaN	NaN	0.901149	10.8571	-0.0698549	-0.515906
WTSI	Ankrd9	homozygote	male	21.5	20.7643	3.4	29.2857	28.3571	24.1349	4.75741	-0.928571	1.99442	96.8259	85.9744	1615.78	2346.96	0.159116	0.119048	2.26352	0.889795	11.4286	-0.0698553	-0.515909
MRC Harwell	Rbpjl	homozygote	male	20.025	22	NaN	26.95	25.8475	20.0195	6.12552	-1.1025	2.07258	100.067	91.3153	2505.99	3548.4	NaN	NaN	NaN	0.913061	10.25	-0.0699136	-0.51634
MRC Harwell	Mtch2	heterozygote	male	19.45	21.35	NaN	25.7375	24.1675	18.9654	5.54598	-1.57	2.08455	101.901	87.3669	2635.96	3682.02	NaN	NaN	NaN	0.856718	11	-0.0700046	-0.517012
BCM	Flywch2	homozygote	male	22.75	21.2333	3.1	26.88	27.24	19.145	3.98198	0.36	1.86622	89.3773	84.8117	NaN	NaN	NaN	NaN	NaN	0.952191	10.4	-0.0967946	-0.517095
HMGU	Pcsk9	homozygote	male	22.075	20.75	3.339	26.6625	25.675	19.6554	3.75096	-0.9875	1.91706	93.0134	82.8423	NaN	NaN	0.124405	NaN	1.73798	0.890365	11	-0.0969571	-0.517964
UC Davis	Il18r1	homozygote	male	24.15	25.581	3.1	26.8043	27.3557	NaN	NaN	0.551429	1.74284	82.7716	81.6879	NaN	NaN	NaN	NaN	NaN	0.987363	10	-0.0972993	-0.519792
UC Davis	Ankrd1	homozygote	male	24.15	26.5389	3.1	24.3817	24.76	18.9811	4.74607	0.378333	1.66413	79.9373	74.7778	NaN	NaN	NaN	NaN	NaN	0.935804	10.8333	-0.0974342	-0.520512
BCM	Trib1	heterozygote	male	22.75	21.2333	3.1	24.55	24.5	17.5564	3.84268	-0.05	1.7898	85.849	80.8685	NaN	NaN	NaN	NaN	NaN	0.9391	10.5	-0.0976495	-0.521662
UC Davis	Cacna1f	hemizygote	male	24.15	26.0667	3.1	31.7686	31.9357	21.262	9.41602	0.167143	1.90315	91.2242	86.2113	NaN	NaN	NaN	NaN	NaN	0.946448	10.1429	-0.0980035	-0.523554
HMGU	Ldlr	homozygote	male	22.1	20.75	3.339	25.1333	24.8667	15.6334	6.95017	-0.266667	1.86424	89.9524	82.3333	NaN	NaN	0.153175	NaN	2.13991	0.914724	10.8333	-0.0980378	-0.523737
HMGU	Dbn1	heterozygote	male	24.11	20.75	3.339	29.08	26.64	NaN	NaN	-2.44	1.81927	89.3631	74.7167	NaN	NaN	0.067619	NaN	0.944664	0.836336	10.4	-0.0981221	-0.524187
TCP	Chst14	homozygote	male	26.35	21.2667	3.1	23.86	23.03	19.2036	4.07377	-0.83	1.60313	78.0207	68.4246	602.424	1582.27	NaN	NaN	NaN	0.877006	11	-0.0710285	-0.524573
TCP	Lgmn	homozygote	male	26.5625	21.4958	3.1	24.8038	24.7538	20.4352	3.96258	-0.05	1.63155	78.754	71.9534	792.197	2152.46	0.168485	NaN	2.18532	0.912618	10	-0.0710413	-0.524668
TCP	Art1	homozygote	male	26.6875	21.3583	3.1	26.4337	26.12	21.204	4.45891	-0.31375	1.66881	80.3432	74.3419	963.364	2487.09	NaN	NaN	NaN	0.925161	10	-0.0712217	-0.526001
HMGU	Slc13a5	homozygote	male	22.18	20.75	3.339	22.4	21.48	17.0639	2.54553	-0.92	1.76827	85.4845	77.5155	NaN	NaN	0.114286	NaN	1.59661	0.907675	10.2	-0.0984687	-0.526039
HMGU	Pdhx	heterozygote	male	22.3833	20.75	3.339	27.9417	26.7333	19.2708	6.12507	-1.20833	1.93039	93.9514	82.38	NaN	NaN	0.121429	NaN	1.6964	0.876393	11	-0.0985979	-0.526729
UC Davis	Bves	homozygote	male	24.15	26.6333	3.1	24.05	24.3471	19.2427	3.46196	0.297143	1.6519	79.3487	74.2313	NaN	NaN	NaN	NaN	NaN	0.934222	10.5714	-0.0989123	-0.528408
UC Davis	Spata46	homozygote	male	24.15	22.3833	3.1	26.5575	27.6875	18.4751	7.35886	1.13	1.73277	82.3023	81.1827	NaN	NaN	NaN	NaN	NaN	0.987776	10.25	-0.099371	-0.530859
WTSI	Snap47	homozygote	male	21.5	20.5857	3.4	32.1143	31.9143	25.2055	6.83531	-0.2	2.04157	99.0356	88.2898	1477.29	2204.93	0.2022	0.161905	2.87641	0.891924	11	-0.0719363	-0.531278
UC Davis	Lrfn2	homozygote	male	24.15	25.9048	3.1	28.2471	28.6043	20.8772	6.24685	0.357143	1.78733	86.0499	79.6196	NaN	NaN	NaN	NaN	NaN	0.925191	11	-0.0996126	-0.53215
WTSI	Pias2	homozygote	male	21.5	20.6111	3.4	28.3	27.3167	22.6384	5.50211	-0.983333	1.97006	96.1767	83.0234	1531.79	2266.47	0.149987	0.126984	2.13365	0.864397	11.5	-0.0721653	-0.532969
ICS	Atad2b	homozygote	male	21	21	3.145	24.06	24.28	18.9121	2.70825	0.22	1.89294	92.2636	80.3	1107.62	1695.24	0.198667	0.13219	2.61419	0.870483	11.4	-0.0724275	-0.534905
WTSI	Aicda	homozygote	male	21	20.2857	3.4	32.1571	30.9857	22.5159	9.42069	-1.17143	2.00867	97.5481	86.479	407.391	619.959	0.148435	4.05442	2.11158	0.886824	11.2857	-0.0724481	-0.535058
ICS	Dcp2	heterozygote	male	21	21	3.145	24.4667	25.3833	15.26	3.5255	0.916667	1.88887	91.1591	83.3561	876.568	1382.74	0.268016	0.171786	3.52674	0.91512	9.66667	-0.072579	-0.536025
WTSI	Rnasek	heterozygote	male	21	20.4286	3.4	27.9429	26.8857	21.4475	5.91732	-1.05714	1.92629	93.6937	82.4114	388.908	596.073	0.146519	4.00952	2.08432	0.878161	11	-0.0726108	-0.536259
WTSI	Ccdc77	homozygote	male	21.5	20.3762	3.4	30.6143	29.9286	23.7236	6.90461	-0.685714	2.00551	97.7561	85.0552	1381.97	2038.39	0.165442	0.121769	2.35351	0.870435	11.7143	-0.0727885	-0.537571
TCP	Hook3	homozygote	male	26.5375	21.6792	3.1	20.1475	20.4775	16.4881	2.92978	0.33	1.6449	78.961	74.0996	2408.17	4905.87	NaN	NaN	NaN	0.937726	10.5	-0.072849	-0.538018
TCP	Sra1	homozygote	male	26.1286	21.9476	3.1	26.1457	25.2886	20.3301	5.20875	-0.857143	1.66812	81.4109	70.3889	717.803	1880.56	0.115714	NaN	1.50086	0.867619	10.7143	-0.0730885	-0.539788
MRC Harwell	Hectd2	homozygote	male	19.8938	21.75	NaN	27.0125	26.1163	19.564	6.83672	-0.89625	2.06551	99.9801	90.0966	2251.7	3235.34	NaN	NaN	NaN	0.901757	10.5	-0.073352	-0.541733
WTSI	Ropn1l	homozygote	male	21	20.7143	3.4	28.0429	27.6143	23.7861	4.47921	-0.428571	1.9367	94.338	82.3665	579.155	843.277	0.17288	4.08299	2.45932	0.873024	11	-0.0734322	-0.542326
WTSI	Ushbp1	homozygote	male	21.5	21.15	3.4	28.0667	27.2833	23.3127	4.37697	-0.783333	1.94317	94.1734	84.3494	1139.86	1706.25	0.172778	0.124603	2.45787	0.895528	11.8333	-0.0734657	-0.542573
UC Davis	2210408I21Rik	homozygote	male	24.15	25.925	3.1	25.3912	25.4988	17.2649	7.5569	0.1075	1.69269	80.9827	77.2239	NaN	NaN	NaN	NaN	NaN	0.954095	10.375	-0.101624	-0.542892
UC Davis	Zfp111	homozygote	male	24.15	27.2	3.1	26.3043	26.4186	20.1814	5.06216	0.114286	1.72216	82.7816	77.1829	NaN	NaN	NaN	NaN	NaN	0.933158	10.7143	-0.101764	-0.543644
TCP	Laptm4b	heterozygote	male	26.425	21.725	3.1	27.3837	26.8725	21.6666	4.55866	-0.51125	1.68089	80.9713	74.7142	757.591	2019.3	NaN	NaN	NaN	0.922663	10.125	-0.0737494	-0.544668
UC Davis	Fan1	homozygote	male	24.15	26.6333	3.1	28.8	29.0975	20.6664	7.59017	0.2975	1.80291	86.7385	80.5322	NaN	NaN	NaN	NaN	NaN	0.927656	10	-0.101966	-0.544724
HMGU	Knl1	heterozygote	male	22.15	20.75	3.339	28.86	27.69	15.1784	7.47967	-1.17	1.97633	96.4726	83.3226	NaN	NaN	0.105238	NaN	1.47022	0.864444	10	-0.102518	-0.547671
UC Davis	Ankrd1	heterozygote	male	24.15	26.0667	3.1	26.71	28.4	20.3408	5.53479	1.69	1.73456	82.4427	81.0707	NaN	NaN	NaN	NaN	NaN	0.983359	11	-0.102521	-0.547685
UC Davis	Rasd1	homozygote	male	24.15	37.4	3.1	28.46	28.622	20.1375	7.0993	0.162	1.77879	86.5434	76.0158	427.057	884.507	0.0943284	0.0534448	1.22348	0.877896	10.6	-0.0742662	-0.548485
MRC Harwell	Bpifb3	homozygote	male	19.1786	21.5905	NaN	25.9171	24.92	19.1842	6.23336	-0.997143	2.12228	103.425	90.0914	3119.11	4339	NaN	NaN	NaN	0.871867	10.7143	-0.0748426	-0.552742
UC Davis	Fan1	homozygote	male	24.15	28.5333	3.1	28.43	27.8233	21.4031	5.90756	-0.606667	1.77662	84.909	81.3703	418.153	861.698	0.098254	0.0483122	1.27439	0.958604	11	-0.0750015	-0.553916
HMGU	Abcb11	heterozygote	male	24.25	20.75	3.339	26.4	24.8714	NaN	NaN	-1.52857	1.71438	83.8844	71.5714	NaN	NaN	0.0945578	NaN	1.32101	0.84918	10	-0.104051	-0.555859
MRC Harwell	Ecm1	heterozygote	male	18.1687	20.8792	NaN	29.275	27.9112	22.4069	5.55333	-1.36375	2.22204	107.617	96.7091	2730.26	3860.52	NaN	NaN	NaN	0.897669	10.375	-0.075293	-0.556068
WTSI	Tceal5	hemizygote	male	21	21.1429	3.4	30.4357	29.55	22.1783	8.16911	-0.885714	1.97733	96.5061	83.4202	524.789	750.588	0.144898	3.97007	2.06126	0.865571	11.9286	-0.0754872	-0.557502
HMGU	Cilp2	homozygote	male	22.1625	20.75	3.339	26.825	25.575	NaN	NaN	-1.25	1.90685	92.5417	82.3155	NaN	NaN	0.121429	NaN	1.6964	0.890059	10	-0.104918	-0.56049
UC Davis	Nr1d2	homozygote	male	24.15	26.6333	3.1	25.64	26.3271	18.2607	6.67058	0.687143	1.69743	81.0917	77.8595	NaN	NaN	NaN	NaN	NaN	0.95976	11	-0.104952	-0.560675
WTSI	Apol7a	homozygote	male	21.5	21.2667	3.4	33.4167	32.3833	23.9633	9.56315	-1.03333	2.04781	100.192	85.518	1179.96	1809.01	0.141369	0.106349	2.01106	0.853455	11.6667	-0.0759192	-0.560694
MRC Harwell	Fgf9	heterozygote	male	18.3062	21.3188	NaN	28.0625	27.4662	21.9509	4.91806	-0.59625	2.1968	106.495	95.2546	2855.92	4032.4	NaN	NaN	NaN	0.894649	11	-0.0763386	-0.563791
MRC Harwell	Primpol	homozygote	male	19.1375	21.5458	NaN	25.675	24.17	19.1618	5.75486	-1.505	2.09658	102.272	88.6453	2682.73	3768.02	NaN	NaN	NaN	0.867608	10.875	-0.0765471	-0.565331
BCM	Dock2	homozygote	male	22.75	21.2333	3.1	24.8	25.2857	17.6398	3.7009	0.485714	1.78966	85.6174	81.6653	NaN	NaN	NaN	NaN	NaN	0.959306	10.8571	-0.105889	-0.565678
HMGU	Xkr5	homozygote	male	22.46	20.75	3.339	25.57	24.58	18.7417	3.14338	-0.99	1.83954	89.075	80.1226	NaN	NaN	0.12619	NaN	1.76293	0.898534	10.5	-0.105933	-0.565917
WTSI	Herc1	homozygote	male	21	20.5625	3.4	29.675	28.7188	21.4041	7.78052	-0.95625	1.95236	94.4606	85.313	318.217	507.827	0.145982	3.83958	2.07668	0.903522	11.1875	-0.0766385	-0.566005
WTSI	Zfp182	hemizygote	male	21	20.7143	3.4	30.3143	29.0071	22.788	7.56894	-1.30714	1.96967	96.1031	83.1999	428.38	640.202	0.147149	3.80646	2.09328	0.866351	11.2857	-0.0766533	-0.566115
MARC	Phf1	homozygote	male	24	21.75	NaN	25.875	26.425	NaN	NaN	0.55	1.71692	82.8102	75.948	NaN	NaN	NaN	NaN	NaN	0.918029	10.5	-0.105984	-0.566188
MRC Harwell	Slfn4	homozygote	male	19.7125	21.5333	NaN	26.8625	25.9875	NaN	NaN	-0.875	2.07589	100.364	90.974	2360.86	3425	NaN	NaN	NaN	0.906567	10	-0.0768058	-0.567241
WTSI	Dnase1l2	homozygote	male	21	21.4286	3.4	23.7	23.2714	18.093	4.75831	-0.428571	1.84288	88.6726	82.2792	433.175	667.634	0.156939	4.05782	2.23255	0.928165	12	-0.0768425	-0.567512
WTSI	Setd4	homozygote	male	21.5	20.6167	3.4	27.0571	26.6	21.5762	5.22085	-0.457143	1.91387	92.6873	83.3128	987.336	1535.64	0.171701	0.134694	2.44255	0.898989	11.7143	-0.0768639	-0.567671
HMGU	Osbpl11	heterozygote	male	22.2944	20.75	3.339	30.8667	29.0889	21.6434	6.58807	-1.77778	2.0252	99.0992	84.5251	NaN	NaN	0.0915344	NaN	1.27877	0.849925	10.4444	-0.106304	-0.567897
WTSI	Edc4	heterozygote	male	21.5	21.419	3.4	30.1286	28.9571	23.8135	6.09977	-1.17143	1.98967	96.8237	84.9545	1295.35	1976.75	0.156672	0.116327	2.22876	0.877847	11.7143	-0.0769355	-0.568199
UC Davis	Il20rb	homozygote	male	24.15	23.2333	3.1	26.5443	27.1013	18.8244	6.55741	0.557	1.74116	83.5778	78.452	439.306	937.922	0.105034	0.0452279	1.36233	0.940067	10	-0.0769402	-0.568234
WTSI	1700007K13Rik	homozygote	male	21	21.4286	3.4	28.8857	27.8571	22.1435	6.33755	-1.02857	1.93966	93.916	84.5089	389.647	586.433	0.147211	3.7068	2.09416	0.901129	12	-0.0770696	-0.569189
HMGU	Chpf	homozygote	male	21.63	20.7167	3.339	23.85	23.34	14.6516	7.09259	-0.51	1.85449	89.7933	80.7933	NaN	NaN	0.124762	NaN	1.74297	0.900082	10.7	-0.10659	-0.569427
WTSI	Pth2r	homozygote	male	21.5	21.3714	3.4	30	28.9429	23.3577	6.29128	-1.05714	2.00171	98.0655	83.1314	1654.69	2370.44	0.155578	0.112245	2.21319	0.847596	11.2857	-0.0772393	-0.570443
ICS	Dusp11	homozygote	male	21	21	3.145	22.4	23.2429	15.0792	2.65053	0.842857	1.84308	90.8661	74.5063	837.675	1350.16	0.236054	0.159524	3.10616	0.818576	10	-0.077259	-0.570588
MRC Harwell	Ahnak	heterozygote	male	20.6	21.6	NaN	25.4462	24.9325	20.474	4.0455	-0.51375	2.00287	96.8938	87.558	2380.87	3474.03	NaN	NaN	NaN	0.903602	11	-0.0773851	-0.571519
MARC	Usp37	heterozygote	male	24	33.375	NaN	27.0429	27.7286	NaN	NaN	0.685714	1.75374	84.2999	78.5979	NaN	NaN	NaN	NaN	NaN	0.932108	11	-0.107038	-0.571818
WTSI	Lamc3	homozygote	male	21.5	20.725	3.4	30.9333	30.2333	23.5681	7.37758	-0.7	2.00731	98.4891	82.8326	1417.48	2048.06	0.160119	0.122222	2.27779	0.840091	11.8333	-0.0775062	-0.572414
TCP	Shroom4	hemizygote	male	26.0125	21.45	3.1	25.5413	24.4787	19.8129	5.3225	-1.0625	1.68	81.8549	71.3739	964.712	2461.78	NaN	NaN	NaN	0.872164	10.375	-0.0775726	-0.572905
WTSI	Slc5a7	heterozygote	male	21.5	20.7139	3.4	29.6	28.5833	24.1511	5.15828	-1.01667	1.97282	95.4091	86.3538	1177.32	1818.64	0.178968	0.119841	2.54593	0.903738	11.8333	-0.0776336	-0.573354
TCP	Slc23a3	homozygote	male	26.4375	21.725	3.1	26.1062	25.0987	19.6906	5.64351	-1.0075	1.645	79.6804	71.5587	705.131	1842.99	NaN	NaN	NaN	0.897033	10.25	-0.0776872	-0.573751
TCP	Chd1	heterozygote	male	26.7143	21.581	3.1	23.5871	23.3871	18.3263	4.33644	-0.2	1.57302	75.7449	70.0281	583.151	1612.62	0.139737	NaN	1.81245	0.920687	10.7143	-0.0777358	-0.574109
HMGU	Ech1	homozygote	male	22.3143	20.75	3.339	27.7	26.9714	18.7574	6.44911	-0.728571	1.91948	92.7823	84.1871	NaN	NaN	0.130612	NaN	1.8247	0.906932	11	-0.107613	-0.574891
HMGU	Spryd3	homozygote	male	22.2667	20.75	3.339	27.7667	26.1	20.2081	5.0989	-1.66667	1.92549	94.1614	80.5728	NaN	NaN	0.0878307	NaN	1.22703	0.858473	10.3333	-0.107857	-0.576193
MRC Harwell	Fgf8	heterozygote	male	20.6375	21.5333	NaN	26.15	24.1137	19.9383	4.77681	-2.03625	2.04787	99.1104	89.3831	3226.63	4379.5	NaN	NaN	NaN	0.901219	11	-0.078078	-0.576637
WTSI	Alg13	hemizygote	male	21.5	20.819	3.4	30.3286	29.4	23.2374	6.81428	-0.928571	2.00728	98.3902	83.1779	1659.41	2374.93	0.151973	0.12585	2.1619	0.846304	11.5714	-0.078178	-0.577375
TCP	Gpa33	homozygote	male	26.9062	22.1375	3.1	26.9925	26.15	22.0435	4.42975	-0.8425	1.65686	80.2228	72.1896	981.843	2376.98	NaN	NaN	NaN	0.900764	10.625	-0.0782267	-0.577735
WTSI	Art4	homozygote	male	21.5	21.0528	3.4	29.3167	28.5	23.0603	7.2006	-0.816667	1.97152	95.7821	84.7453	1314.84	1947.48	0.159868	0.113492	2.27421	0.88475	11.6667	-0.0783109	-0.578357
UC Davis	Nmral1	homozygote	male	24.15	26.6333	3.1	25.2583	25.5917	NaN	NaN	0.333333	1.68172	79.4236	80.4085	NaN	NaN	NaN	NaN	NaN	1.02181	10.3333	-0.108283	-0.578468
MRC Harwell	Il15	homozygote	male	20.3875	20.6833	NaN	25.4875	NaN	19.4347	4.44229	NaN	2.00862	96.8226	89.0541	2306.68	3335.77	NaN	NaN	NaN	0.920484	10.5	-0.0784696	-0.579529
WTSI	Tram2	homozygote	male	21.5	21.1286	3.4	26.3714	25.8143	20.7569	5.91353	-0.557143	1.93271	94.1032	82.3397	1702.36	2437.26	0.155918	0.144898	2.21803	0.874689	11.4286	-0.0787378	-0.58151
BCM	Gdpd5	homozygote	male	22.75	21.2333	3.1	24.275	23.8125	17.4302	3.27402	-0.4625	1.76953	84.8347	80.1027	NaN	NaN	NaN	NaN	NaN	0.947025	10.625	-0.108998	-0.582286
HMGU	4932438A13Rik	heterozygote	male	22.225	20.75	3.339	23.5125	23.4125	14.4739	5.80567	-0.1	1.78926	86.0878	79.9018	NaN	NaN	0.158333	NaN	2.21198	0.928491	10.5	-0.109691	-0.585991
HMGU	Ggps1	heterozygote	male	24.75	20.75	3.339	25.9125	24.0625	15.454	7.55228	-1.85	1.64987	81.1994	67.1979	NaN	NaN	0.064881	NaN	0.906411	0.827681	10.5	-0.109743	-0.586271
WTSI	Abcb6	homozygote	male	21.5	20.5476	3.4	29.6857	28.9714	23.1922	6.44343	-0.714286	1.98864	97.0883	83.7894	1533.79	2243.42	0.164059	0.116327	2.33384	0.863264	11.1429	-0.07946	-0.586843
UC Davis	Gpbar1	homozygote	male	24.15	27.2	3.1	26.442	26.254	21.6973	3.29855	-0.188	1.7185	82.5607	77.1788	NaN	NaN	NaN	NaN	NaN	0.92453	10.8	-0.109892	-0.587062
UC Davis	Fads1	homozygote	male	24.15	27.0583	3.1	25.42	24.86	NaN	NaN	-0.56	1.68512	81.353	74.2694	NaN	NaN	NaN	NaN	NaN	0.912255	10.875	-0.110122	-0.588293
TCP	Dnal1	heterozygote	male	27.4875	22.275	3.1	27.4925	27.315	21.2217	5.78675	-0.1775	1.61903	78.2086	71.192	753.29	1971.32	NaN	NaN	NaN	0.909698	10.75	-0.0796725	-0.588413
MRC Harwell	Mlh1	homozygote	male	18.1438	21.4	NaN	26.4375	25.92	21.2451	4.90032	-0.5175	2.15583	103.927	95.5511	2483.19	3647.22	NaN	NaN	NaN	0.9188	10.625	-0.0800439	-0.591156
WTSI	Wdtc1	homozygote	male	21.5	21.2262	3.4	27.2714	26.6286	21.612	5.55061	-0.642857	1.92467	92.5425	86.1642	1187.48	1797.74	0.170159	0.128571	2.42061	0.931372	11.4286	-0.0800605	-0.591278
UC Davis	Padi6	homozygote	male	24.15	26.4917	3.1	27.255	27.61	20.5796	5.89839	0.355	1.74403	83.2163	80.3593	NaN	NaN	NaN	NaN	NaN	0.964393	11	-0.110734	-0.59156
WTSI	Oas1g	homozygote	male	21.5	21.0528	3.4	32.7667	31.1167	24.5344	8.7097	-1.65	2.04631	100.407	84.4268	1524.29	2213.53	0.133948	0.104762	1.9055	0.841491	11.5	-0.0801162	-0.59169
UC Davis	Foxn1	heterozygote	male	24.15	27.2	3.1	28.5275	28.8038	19.7985	8.0532	0.27625	1.78459	85.3361	81.5715	NaN	NaN	NaN	NaN	NaN	0.956097	10.875	-0.111443	-0.595352
HMGU	Wars	heterozygote	male	24.4	20.75	3.339	26.5125	25.4625	16.6886	6.69503	-1.05	1.69765	83.006	71.0863	NaN	NaN	0.102381	NaN	1.4303	0.856495	10.25	-0.111527	-0.595797
MRC Harwell	Tnxb	homozygote	male	20.2125	22.0646	NaN	25.5125	24.698	20.497	4.66655	-0.422	2.03535	98.0607	90.4179	2762.85	3845.76	NaN	NaN	NaN	0.92212	10.25	-0.0806891	-0.595921
TCP	Ano6	homozygote	male	26.55	22	3.1	21.64	21.68	18.9266	2.77869	0.04	1.56427	75.1862	70.1267	831.344	2226.36	NaN	NaN	NaN	0.932707	10	-0.0807223	-0.596166
UC Davis	Panx2	homozygote	male	24.15	26.7042	3.1	29.46	29.7675	20.773	7.73541	0.3075	1.81457	85.9569	85.8367	NaN	NaN	NaN	NaN	NaN	1.01481	10.125	-0.111713	-0.596795
TCP	Iqgap1	homozygote	male	27.4375	21.8167	3.1	23.59	23.5862	19.6186	3.8043	-0.00375	1.54604	73.9162	70.7126	734.026	1994.04	NaN	NaN	NaN	0.955548	10	-0.0808693	-0.597251
HMGU	Stx5a	heterozygote	male	22.25	20.75	3.339	26.9	25.26	21.0987	3.44598	-1.64	1.89487	92.5488	79.7012	NaN	NaN	0.103333	NaN	1.44361	0.859921	10.4	-0.111804	-0.597278
WTSI	Dph2	heterozygote	male	21.5	20.8381	3.4	29.1286	28.1714	23.1248	5.76414	-0.957143	1.95732	96.0627	80.6771	1129.66	1734.89	0.139184	0.109524	1.97997	0.839648	11.5714	-0.0808758	-0.5973
WTSI	Ttll11	homozygote	male	21.5	20.9667	3.4	27.6429	26.8143	21.1062	6.60607	-0.828571	1.94317	95.0305	81.2952	1462.24	2122.74	0.143605	0.12517	2.04287	0.856516	11	-0.0809717	-0.598008
WTSI	Def6	homozygote	male	21.5	20.6381	3.4	28.3286	27.6429	21.0282	6.95212	-0.685714	1.94195	94.852	81.6687	1126.03	1743.13	0.148476	0.12585	2.11216	0.861498	11.7143	-0.0811244	-0.599136
WTSI	Zcchc14	homozygote	male	21.5	21	3.4	23.4	23.5	19.4231	3.82859	0.1	1.85608	88.6719	85.1328	1287.33	1989.5	0.191667	0.140476	2.72657	0.961127	12	-0.0811761	-0.599518
WTSI	Fbxl7	homozygote	male	21.5	21.1611	3.4	29.5333	28.95	22.8605	6.48275	-0.583333	1.97295	96.5296	82.3906	1323.12	1955.81	0.1395	0.140476	1.98447	0.851421	11.1667	-0.081375	-0.600986
HMGU	Apoc4	homozygote	male	22.2591	20.75	3.339	24.4273	24.0364	15.0085	5.95912	-0.390909	1.81317	87.7835	79.026	NaN	NaN	0.136364	NaN	1.90505	0.900792	10.1818	-0.11252	-0.601105
ICS	5330417C22Rik	heterozygote	male	21	21	3.145	22.9556	23.5667	15.8717	2.21369	0.611111	1.8614	89.4861	83.3813	1089.77	1662.94	0.235926	0.185893	3.10447	0.929808	9.66667	-0.081441	-0.601474
WTSI	Dusp3	homozygote	male	21	21	3.4	28.7571	27.7857	21.1528	7.48589	-0.971429	1.93677	95.0106	79.9849	485.851	693.396	0.135935	4.00952	1.93376	0.841855	11.5714	-0.0815022	-0.601926
UC Davis	Unc13b	heterozygote	male	24.15	27.2	3.1	27.6343	27.6229	20.3749	6.32532	-0.0114286	1.75423	84.0266	79.676	NaN	NaN	NaN	NaN	NaN	0.947784	11	-0.112836	-0.602794
UC Davis	Papolb	homozygote	male	24.15	30.4381	3.1	29.04	29.3914	21.0215	7.18364	0.351429	1.79958	86.1118	82.0473	NaN	NaN	NaN	NaN	NaN	0.953148	11	-0.113073	-0.604058
HMGU	Cpe	homozygote	male	24.1937	20.75	3.339	36.6375	33.3	NaN	NaN	-3.3375	2.04215	101.106	81.0372	NaN	NaN	0.052381	NaN	0.731782	0.800343	10.875	-0.113168	-0.604565
TCP	Rnase1	homozygote	male	26.7125	21.9083	3.1	27.605	26.9225	22.0218	4.32221	-0.6825	1.6726	80.6788	73.9655	857.541	2305.3	NaN	NaN	NaN	0.917759	10.5	-0.0818624	-0.604586
ICS	Ankrd11	heterozygote	male	21	21	3.145	24.7833	25.5833	15.2421	4.60737	0.8	1.88136	90.553	83.8939	797.227	1268.5	0.248571	0.154048	3.27087	0.925901	11.1667	-0.0818921	-0.604805
HMGU	Fam53b	homozygote	male	23.9167	20.75	3.339	24.5667	23.1222	NaN	NaN	-1.44444	1.6743	81.5648	71.1759	NaN	NaN	0.0984127	NaN	1.37486	0.871386	10.2222	-0.113336	-0.605464
ICS	Iqce	homozygote	male	21	21	3.145	26.7571	26.6714	17.9685	2.98013	-0.0857143	1.93151	93.7468	83.3507	1060.07	1598.31	0.226735	0.13619	2.98353	0.889949	12	-0.0822484	-0.607437
UC Davis	Tmem160	homozygote	male	24.15	35.1333	3.1	27.1543	27.02	20.2847	6.00275	-0.134286	1.73768	82.937	79.9831	NaN	NaN	NaN	NaN	NaN	0.963969	11	-0.113812	-0.608008
UC Davis	Tmem119	homozygote	male	24.15	27.4833	3.1	24.4312	24.9337	18.8074	4.44618	0.5025	1.6492	79.2136	74.1304	NaN	NaN	NaN	NaN	NaN	0.936576	10.375	-0.113972	-0.608863
HMGU	Capn12	homozygote	male	23.4667	20.75	3.339	25.8778	24.6889	15.9484	6.61377	-1.18889	1.75487	85.5875	74.2533	NaN	NaN	0.0989418	NaN	1.38225	0.865314	10.6667	-0.113995	-0.608984
WTSI	Pdzd3	homozygote	male	21.5	20.8762	3.4	29.0714	28.1429	22.9626	5.8154	-0.928571	1.9584	95.544	82.757	1222.58	1835.31	0.162177	0.127211	2.30706	0.866701	11.4286	-0.0824827	-0.609167
UC Davis	Pld1	homozygote	male	24.15	27.4833	3.1	30.7138	31.4262	22.6397	7.19384	0.7125	1.85289	88.5326	84.9397	NaN	NaN	NaN	NaN	NaN	0.959138	10.875	-0.114058	-0.609317
WTSI	1500011B03Rik	homozygote	male	21.5	20.45	3.4	29.7	28.5143	21.6125	8.3671	-1.18571	1.99699	98.7375	79.7185	1742.86	2539.59	0.131088	0.0891156	1.86481	0.807222	12	-0.0825323	-0.609533
WTSI	Hacl1	homozygote	male	21.5	21.0167	3.4	27.5667	27.1667	21.7185	5.71425	-0.4	1.93334	94.3489	81.6015	1276.83	1942.44	0.154821	0.133333	2.20243	0.864754	11.8333	-0.0825346	-0.60955
HMGU	Maea	heterozygote	male	22.2	20.75	3.339	24.2429	23.6	15.4646	5.52712	-0.642857	1.81065	87.7194	78.7109	NaN	NaN	0.134014	NaN	1.87222	0.897903	10	-0.114138	-0.609745
UC Davis	Cdkn1c	heterozygote	male	24.15	27.281	3.1	30.5729	30.0829	NaN	NaN	-0.49	1.84815	88.5109	83.9929	NaN	NaN	NaN	NaN	NaN	0.949882	10.8571	-0.114228	-0.61023
UC Davis	Spata6	homozygote	male	24.15	27.1292	3.1	26.9138	26.8475	20.3525	5.31253	-0.06625	1.729	82.5647	79.4335	NaN	NaN	NaN	NaN	NaN	0.96272	10	-0.114694	-0.612719
MRC Harwell	Adam11	homozygote	male	20.3571	20.9286	NaN	26.8571	25.23	21.2855	5.22654	-1.62714	2.04125	98.9439	88.5468	2507.53	3578.73	NaN	NaN	NaN	0.894567	10.2857	-0.0830209	-0.613142
WTSI	Seh1l	heterozygote	male	21.5	20.5452	3.4	30.3714	29.6714	22.0741	8.58479	-0.7	1.99625	97.5829	83.6722	1532.42	2189.54	0.160068	0.114966	2.27706	0.861111	12	-0.0830489	-0.613349
HMGU	Gfpt2	homozygote	male	24.6714	20.75	3.339	23.3143	22.2429	14.732	5.43629	-1.07143	1.56727	76.3503	66.6276	NaN	NaN	0.0897959	NaN	1.25448	0.871083	10	-0.114827	-0.613425
UC Davis	Tox	homozygote	male	24.15	26.8762	3.1	28.1071	28.1171	20.3386	6.84545	0.01	1.76732	84.4725	80.916	NaN	NaN	NaN	NaN	NaN	0.958795	11	-0.115082	-0.61479
HMGU	Gpatch2l	homozygote	male	22.4167	20.75	3.339	26.2667	24.9333	20.1223	3.66711	-1.33333	1.85637	90.1812	79.8188	NaN	NaN	0.11164	NaN	1.55966	0.884644	10.2222	-0.115422	-0.616607
HMGU	Lpo	homozygote	male	24.175	20.75	3.339	28.25	26.7875	NaN	NaN	-1.4625	1.76929	86.5565	73.9167	NaN	NaN	0.0982143	NaN	1.37209	0.854023	10.375	-0.11559	-0.617506
UC Davis	Vwa1	homozygote	male	24.15	26.8762	3.1	27.5643	28.6571	19.3515	7.52916	1.09286	1.74899	84.1474	78.1133	NaN	NaN	NaN	NaN	NaN	0.928136	10.2857	-0.115805	-0.61865
WTSI	Cyp20a1	homozygote	male	21.5	21.0571	3.4	27.1571	26.2	22.3304	4.75927	-0.957143	1.93048	93.5696	83.7593	1409.75	2113.55	0.150578	0.126531	2.14207	0.897242	11.5714	-0.0839404	-0.619933
UC Davis	Ppp1r32	homozygote	male	24.15	26.2667	3.1	27.7086	27.9314	20.2371	6.68255	0.222857	1.75341	84.5916	77.4859	NaN	NaN	NaN	NaN	NaN	0.917133	10.5714	-0.116064	-0.620034
TCP	Atl3	homozygote	male	26.1438	21.6333	3.1	27.535	25.7662	22.6561	4.60911	-1.76875	1.66903	80.9411	72.2582	515.865	1504.72	NaN	NaN	NaN	0.892066	10.375	-0.084037	-0.620646
WTSI	Sh2d5	homozygote	male	21.5	20.5071	3.4	29.4286	28.7286	22.553	7.22843	-0.7	1.96516	95.8465	83.1403	1236.04	1875.46	0.159615	0.117007	2.27061	0.868323	11.8571	-0.084124	-0.621289
TCP	Aire	homozygote	male	26.5286	21.5286	3.1	28.9643	27.5471	22.1928	5.92855	-1.41714	1.6934	82.0466	73.5862	677.831	1965.86	NaN	NaN	NaN	0.89734	10.7143	-0.0842421	-0.622161
HMGU	Fgfr1op	heterozygote	male	24	20.75	3.339	25.625	24.5875	15.9555	6.33624	-1.0375	1.69825	82.9628	71.3705	NaN	NaN	0.1	NaN	1.39704	0.860119	10.375	-0.116543	-0.622593
UC Davis	Fam72a	homozygote	male	24.15	26.9571	3.1	27.1629	26.5186	NaN	NaN	-0.644286	1.73499	83.2921	78.1352	NaN	NaN	NaN	NaN	NaN	0.938179	10.4286	-0.116787	-0.623897
UC Davis	Dkk4	homozygote	male	24.15	26.6333	3.1	28.68	29.18	NaN	NaN	0.5	1.78399	85.0268	82.544	NaN	NaN	NaN	NaN	NaN	0.967114	11	-0.116989	-0.624978
UC Davis	Nalcn	heterozygote	male	24.15	26.6333	3.1	26.7529	26.9857	20.61	4.86098	0.232857	1.72133	81.9845	79.8423	NaN	NaN	NaN	NaN	NaN	0.973516	10.4286	-0.117149	-0.625835
WTSI	4933402N03Rik	homozygote	male	21.5	20.9524	3.4	27.1143	27.0286	22.6963	4.3496	-0.0857143	1.9208	92.9881	83.7404	1244.92	1901.58	0.190952	0.153741	2.71641	0.901982	11.5714	-0.0848069	-0.626333
UC Davis	Cd5	homozygote	male	24.15	23.2333	3.1	27.81	28.48	19.7165	7.41504	0.67	1.76655	84.8378	79.4489	589.69	1177.33	0.0995238	0.0670476	1.29086	0.93648	10	-0.0849866	-0.62766
WTSI	Slc20a2	heterozygote	male	21.5	20.7333	3.4	29.3167	28.4	24.1249	5.22003	-0.916667	1.94903	94.9083	82.9986	1011.26	1530.48	0.15037	0.130159	2.13911	0.875414	11.6667	-0.0851013	-0.628507
BCM	Psca	homozygote	male	22.75	21.1714	3.1	25.9429	25.9286	18.6875	3.45418	-0.0142857	1.81495	87.6362	79.9354	NaN	NaN	NaN	NaN	NaN	0.912132	10	-0.117674	-0.628639
UC Davis	Asic4	homozygote	male	24.15	28.8528	3.1	27.7608	28.2258	20.0611	6.86766	0.465	1.75322	84.2636	78.6134	NaN	NaN	NaN	NaN	NaN	0.93288	10.3333	-0.11795	-0.630111
WTSI	Gm13547	homozygote	male	21.5	21.2111	3.4	30.2	29.4333	21.9724	8.34132	-0.766667	1.99228	97.9061	81.6613	1553.68	2237.24	0.145972	0.116667	2.07654	0.833621	11.8333	-0.085514	-0.631555
TCP	Chchd1	heterozygote	male	27.7937	21.9542	3.1	25.67	25.4387	20.3224	5.26782	-0.23125	1.57743	76.1325	69.5991	932.627	2386.46	NaN	NaN	NaN	0.916638	11	-0.0855367	-0.631723
UC Davis	9530077C05Rik	homozygote	male	24.15	27.281	3.1	30.1014	30.3157	21.1723	8.11377	0.214286	1.82868	87.6248	82.944	NaN	NaN	NaN	NaN	NaN	0.947145	11	-0.118402	-0.632524
UC Davis	Cst9	homozygote	male	24.15	23.2333	3.1	26.9483	27.325	20.1018	6.06319	0.376667	1.7379	83.4056	78.3602	417.929	875.429	0.103889	0.0573571	1.34748	0.940023	10.6667	-0.0856481	-0.632545
HMGU	Btbd9	homozygote	male	24.1643	20.75	3.339	22.8857	22.0714	NaN	NaN	-0.814286	1.59315	77.5068	68.0986	NaN	NaN	0.108163	NaN	1.51108	0.878744	10.4286	-0.11867	-0.63396
HMGU	Gde1	heterozygote	male	22.25	20.75	3.339	28.8714	27.4714	16.712	9.49883	-1.4	1.95193	95.5748	81.25	NaN	NaN	0.0959184	NaN	1.34002	0.8489	11	-0.118682	-0.634023
MRC Harwell	Fgf10	heterozygote	male	19.95	22.3167	NaN	26.15	25.1513	18.8655	6.84863	-0.99875	2.04054	98.3462	90.5228	2374.04	3426.28	NaN	NaN	NaN	0.919875	10.625	-0.085893	-0.634354
WTSI	Ubxn10	homozygote	male	21	20.8571	3.4	30.1	29.6143	21.0993	8.98339	-0.485714	1.95131	94.8396	83.7354	322.939	513.723	0.148685	4.01701	2.11513	0.882835	11.2857	-0.0861115	-0.635967
UC Davis	Med28	heterozygote	male	24.15	26.9571	3.1	28.6343	28.4857	20.9085	6.31178	-0.148571	1.78034	84.6922	82.9481	NaN	NaN	NaN	NaN	NaN	0.980056	11	-0.119153	-0.636538
TCP	Gtf2b	heterozygote	male	26.3	21.4042	3.1	25.805	24.8775	20.194	4.96814	-0.9275	1.66194	80.813	71.1833	931.368	2482.32	0.12101	NaN	1.56955	0.879735	10	-0.0862843	-0.637243
TCP	Fam49b	heterozygote	male	27.7563	21.4958	3.1	24.9775	24.6663	19.9048	4.25151	-0.31125	1.53867	74.3326	67.6369	580.377	1681.26	0.154853	NaN	2.0085	0.910545	10	-0.086365	-0.637839
MRC Harwell	Prdm4	homozygote	male	19.7	21.2625	NaN	23.8625	22.8962	19.0407	3.54564	-0.96625	2.0757	101.909	85.4245	3866.55	5196.06	NaN	NaN	NaN	0.839066	10.125	-0.0864608	-0.638547
UC Davis	Gc	homozygote	male	24.15	27.0381	3.1	27.35	26.9814	NaN	NaN	-0.368571	1.73811	83.7791	77.0755	NaN	NaN	NaN	NaN	NaN	0.920735	11	-0.11973	-0.639619
HMGU	Mtif3	heterozygote	male	21.45	20.75	3.339	26.7875	25.775	19.0623	4.96379	-1.0125	1.95209	95.3557	82.0655	NaN	NaN	0.104762	NaN	1.46356	0.861606	10.25	-0.119742	-0.639686
MRC Harwell	Atp5l	heterozygote	male	18.3813	21.2167	NaN	27.475	26.1737	21.4333	4.61348	-1.30125	2.13957	103.737	92.7132	2213.47	3197.19	NaN	NaN	NaN	0.893673	11	-0.086815	-0.641163
TCP	Abce1	heterozygote	male	27.6	22.6417	3.1	25.2488	25.3762	17.9548	4.51317	0.1275	1.6002	77.0544	71.2342	1186.15	2976.87	NaN	NaN	NaN	0.924777	10.375	-0.087124	-0.643445
TCP	1700003F12Rik	heterozygote	male	26.9312	21.5417	3.1	28.4625	28.3388	20.4371	7.29129	-0.12375	1.66431	80.7116	72.0582	783.586	2093.62	0.151207	NaN	1.96121	0.89239	10.5	-0.0871482	-0.643624
WTSI	Hsp90aa1	homozygote	male	21.5	20.5056	3.4	30.8167	29.1833	24.6885	6.18661	-1.63333	1.97952	97.808	79.254	1094.87	1629.34	0.114901	0.103968	1.63453	0.810634	11.3333	-0.0872799	-0.644597
UC Davis	Dnm1	heterozygote	male	24.15	26.2286	3.1	27.4443	26.3486	20.3875	6.16219	-1.09571	1.74009	83.7613	77.5653	NaN	NaN	NaN	NaN	NaN	0.924799	10	-0.120815	-0.645419
KMPC	Cxcl5	homozygote	male	22	20	NaN	27.2888	26.9275	21.3728	5.16233	-0.36125	2.09453	100.885	93.1422	3276.73	7201.98	0.180893	0.129405	NaN	0.92668	10.75	-0.0875686	-0.646729
HMGU	Ifi27l2a	homozygote	male	23.3687	20.75	3.339	25.05	24.025	15.3803	6.12027	-1.025	1.72926	84.2024	73.6533	NaN	NaN	0.105952	NaN	1.48019	0.873001	10.25	-0.121186	-0.647396
MARC	Blvrb	homozygote	male	24	29.7685	NaN	26.6333	26.6778	19.9148	5.26466	0.0444444	1.72627	83.1268	76.8397	NaN	NaN	NaN	NaN	NaN	0.924969	11	-0.121235	-0.64766
WTSI	Cldn34b2	hemizygote	male	21.5	20.7857	3.4	29.3571	28.5	22.409	7.28362	-0.857143	1.9652	95.7728	83.4123	1372.69	2010.58	0.140431	0.123129	1.99771	0.871726	12	-0.0877899	-0.648363
HMGU	Jmjd6	heterozygote	male	22.0929	20.75	3.339	24.4286	23.6	15.0265	5.94984	-0.828571	1.81863	88.0884	79.1207	NaN	NaN	0.123129	NaN	1.72016	0.897578	10	-0.121395	-0.648515
UC Davis	Panx3	homozygote	male	24.15	27.4799	3.1	25.322	24.692	NaN	NaN	-0.63	1.67055	80.3724	74.6139	NaN	NaN	NaN	NaN	NaN	0.927574	10.4	-0.121518	-0.649172
HMGU	Ngdn	heterozygote	male	22.45	20.75	3.339	27.51	25.26	20.8271	4.52271	-2.25	1.88756	92.5	78.2952	NaN	NaN	0.0761905	NaN	1.06441	0.845169	10.8	-0.121697	-0.650129
UC Davis	Adcy6	homozygote	male	24.15	26.475	3.1	26.3337	26.6412	20.1223	5.56523	0.3075	1.70306	81.4609	77.7613	NaN	NaN	NaN	NaN	NaN	0.955198	10.5	-0.12182	-0.650788
WTSI	Spns2	homozygote	male	21	20.1429	3.4	26.9	27.1	21.2134	5.87617	0.2	1.89952	92.233	81.8315	580.13	837.484	0.202948	4.23401	2.88705	0.88925	11.7143	-0.0883475	-0.652481
HMGU	Cyp7a1	homozygote	male	22.6687	20.6562	3.339	23.9875	23.45	17.239	2.16298	-0.5375	1.75365	84.7125	77.1073	NaN	NaN	0.133333	NaN	1.86272	0.910224	10.375	-0.122538	-0.654621
TCP	Atp6v1c1	heterozygote	male	27.9187	21.7708	3.1	27.055	26.795	22.7302	3.86808	-0.26	1.58491	76.7976	68.8462	927.1	2136.34	NaN	NaN	NaN	0.895516	10.5	-0.0887457	-0.655422
UC Davis	Castor1	homozygote	male	24.15	28.3333	3.1	27.2213	27.3263	NaN	NaN	0.105	1.73092	82.819	78.9413	NaN	NaN	NaN	NaN	NaN	0.952641	10.5	-0.122751	-0.655757
TCP	Ccdc9b	homozygote	male	26.5437	21.5417	3.1	27.1663	26.5575	21.6598	5.16516	-0.60875	1.68735	81.5808	73.9386	1164.43	2870.02	NaN	NaN	NaN	0.905838	10.625	-0.0888402	-0.65612
WTSI	Lyplal1	homozygote	male	21.5	21.2927	3.4	29.8857	29.1429	23.0066	7.13248	-0.742857	1.98353	96.2027	85.842	1553.05	2269.99	0.164649	0.117007	2.34222	0.892491	11.4286	-0.0894234	-0.660427
UC Davis	B2m	heterozygote	male	24.15	26.9571	3.1	30.1629	29.45	21.4046	7.95333	-0.712857	1.82535	87.6442	82.1558	NaN	NaN	NaN	NaN	NaN	0.939476	11	-0.123721	-0.660944
HMGU	Sirt5	homozygote	male	22.2111	20.75	3.339	26.6778	25.0556	NaN	NaN	-1.62222	1.87868	91.5198	79.8704	NaN	NaN	0.107937	NaN	1.50791	0.874657	10.8889	-0.124125	-0.6631
MRC Harwell	Ntrk2	heterozygote	male	18.1687	21.3917	NaN	28.75	28.07	23.7365	4.80971	-0.68	2.20812	107.079	95.6202	2983.75	4151.08	NaN	NaN	NaN	0.893523	11	-0.0900237	-0.66486
UC Davis	Fam151a	homozygote	male	24.15	37.4	3.1	31.69	31.53	21.5209	9.2057	-0.16	1.81738	88.2916	78.1247	311.985	678.552	0.0913433	0.0446567	1.18476	0.884849	11	-0.0902509	-0.666538
UC Davis	Mfsd2a	heterozygote	male	24.15	23.2333	3.1	28.245	29.02	21.782	5.21335	0.775	1.75677	83.5454	81.9394	403.238	837.524	0.115952	0.0752381	1.50395	0.981278	10	-0.0903715	-0.667429
HMGU	Cstf3	heterozygote	male	22.2833	20.5833	3.339	27.2	26.2333	16.6855	6.83036	-0.966667	1.88839	92.1095	79.8658	NaN	NaN	0.107407	NaN	1.50052	0.866637	10	-0.12515	-0.668575
UC Davis	Fndc7	homozygote	male	24.15	25.7125	3.1	29.1187	29.1812	21.0423	6.77079	0.0625	1.78929	86.0528	80.0341	NaN	NaN	NaN	NaN	NaN	0.931427	11	-0.125916	-0.672669
MRC Harwell	Gpr1	heterozygote	male	19.8286	21.35	NaN	24.0514	23.24	NaN	NaN	-0.811429	2.0101	98.0461	85.0138	2589.66	3662.29	NaN	NaN	NaN	0.867104	10.5714	-0.0911526	-0.673198
UC Davis	Slc39a7	heterozygote	male	24.15	25.0222	3.1	28.2	27.9033	21.0575	5.99071	-0.296667	1.75905	84.4493	79.2128	NaN	NaN	NaN	NaN	NaN	0.938435	10.3333	-0.126358	-0.675028
UC Davis	1700010I14Rik	homozygote	male	24.15	23.2333	3.1	28.9	28.53	NaN	NaN	-0.37	1.76537	84.342	80.9597	329	759.738	0.103095	0.0685	1.33719	0.959898	10	-0.0914789	-0.675608
KMPC	Tmem86a	homozygote	male	22	20	NaN	30.9975	30.0025	NaN	NaN	-0.995	2.08011	99.7825	93.9567	2200.78	5024.58	0.184286	0.117619	NaN	0.940559	11	-0.0915594	-0.676203
UC Davis	Spink2	homozygote	male	24.15	28.2389	3.1	29.405	29.795	NaN	NaN	0.39	1.7979	86.298	81.0202	NaN	NaN	NaN	NaN	NaN	0.939002	10.8333	-0.126594	-0.676288
HMGU	Sec14l4	homozygote	male	21.905	20.75	3.339	24.98	24.32	NaN	NaN	-0.66	1.84747	89.5655	80.0881	NaN	NaN	0.12381	NaN	1.72967	0.893701	10	-0.126607	-0.676357
TCP	Pipox	homozygote	male	27	21.7905	3.1	26.1457	24.0571	20.7616	5.00448	-2.08857	1.58167	77.1182	67.0038	388.318	1301.81	0.0933636	NaN	1.21096	0.866328	10.8571	-0.0916327	-0.676744
UC Davis	1700037C18Rik	homozygote	male	24.15	28.5381	3.1	28.63	28.81	20.3843	7.59303	0.18	1.77228	84.8096	80.7871	NaN	NaN	NaN	NaN	NaN	0.953596	11	-0.127078	-0.678876
HMGU	Entpd1	homozygote	male	24.3071	20.75	3.339	25.3571	23.6	NaN	NaN	-1.75714	1.65248	81.1054	68.0969	NaN	NaN	0.070068	NaN	0.978877	0.840194	10.4286	-0.127211	-0.679588
TCP	Polr3b	heterozygote	male	27.2625	21.3125	3.1	27.8987	26.95	22.2579	4.55481	-0.94875	1.63794	79.2179	71.6818	885.705	2281.53	NaN	NaN	NaN	0.904648	10.5	-0.0921892	-0.680854
UC Davis	Cnga3	homozygote	male	24.15	23.2333	3.1	27.815	27.82	20.4056	6.56233	0.005	1.75303	83.8412	80.078	506.774	1008.94	0.111548	0.0646429	1.44682	0.955183	10	-0.0922646	-0.68141
MRC Harwell	Fabp1	homozygote	male	19.0786	20.9857	NaN	25.5286	24.1686	18.6616	5.64432	-1.36	2.05556	100.136	87.3924	2174.04	3088.63	NaN	NaN	NaN	0.872008	10.2857	-0.0922781	-0.68151
UC Davis	Retsat	homozygote	male	24.15	23.2333	3.1	28.6571	26.6443	20.5183	7.44597	-2.01286	1.76307	84.844	78.674	395.959	844.898	0.100612	0.0719728	1.30498	0.928667	10.7143	-0.0922997	-0.68167
HMGU	Me3	homozygote	male	22.1455	20.75	3.339	26.3091	25.9091	15.8702	6.88097	-0.4	1.86884	90.4892	81.4145	NaN	NaN	0.14026	NaN	1.95948	0.900303	10.6364	-0.127664	-0.682004
UC Davis	Mctp1	homozygote	male	24.15	26.0667	3.1	29.16	29.6867	21.1539	6.71773	0.526667	1.78838	85.5621	81.5847	NaN	NaN	NaN	NaN	NaN	0.952538	10	-0.128169	-0.684706
WTSI	Dcx	hemizygote	male	21.5	20.0024	3.4	28.5714	28.1143	21.9745	6.9564	-0.457143	1.95303	95.0205	83.4627	1565.06	2226	0.162177	0.132653	2.30706	0.879809	11.7143	-0.0929109	-0.686184
MRC Harwell	Clstn3	homozygote	male	19.2429	21	NaN	23.4571	22	17.7217	5.16656	-1.45714	2.0857	100.326	93.2264	3893.98	5200.16	NaN	NaN	NaN	0.928252	10.8571	-0.0929841	-0.686724
UC Davis	Gja10	homozygote	male	24.15	25.5	3.1	27.9614	27.4986	19.3206	7.59553	-0.462857	1.74908	84.0905	78.3369	NaN	NaN	NaN	NaN	NaN	0.928376	11	-0.128589	-0.686949
BCM	Nanos2	homozygote	male	22.75	21.2333	3.1	25.2143	25.1429	18.2188	3.15728	-0.0714286	1.7803	85.9076	78.6085	NaN	NaN	NaN	NaN	NaN	0.914999	10.2857	-0.128686	-0.687468
HMGU	Slc25a15	heterozygote	male	22.1	20.75	3.339	32.3333	30.9222	NaN	NaN	-1.41111	2.06698	100.807	87.4696	NaN	NaN	0.117989	NaN	1.64836	0.867455	10	-0.128816	-0.688158
WTSI	Mtss1l	homozygote	male	21.5	21.1083	3.4	26.6333	26.4167	21.4008	4.81507	-0.216667	1.9085	92.2315	83.7769	1356.89	2051	0.178446	0.163492	2.5385	0.908341	11.5	-0.0934602	-0.690241
TCP	Mgmt	homozygote	male	26.6	21.5875	3.1	28.3263	27.52	22.0553	5.99646	-0.80625	1.69507	82.1676	73.5157	1068.13	2685.46	NaN	NaN	NaN	0.894149	10.75	-0.0935784	-0.691114
WTSI	Map2k7	heterozygote	male	21.5	20.7095	3.4	31.5857	30.9286	22.717	8.96811	-0.657143	1.99504	97.4145	84.0103	1184.86	1814.89	0.159127	0.120408	2.26368	0.865058	11.7143	-0.0935842	-0.691156
UC Davis	Clrn1	homozygote	male	24.15	26.3095	3.1	28.1086	28.4	21.2984	5.55103	0.291429	1.75299	84.0586	79.2946	NaN	NaN	NaN	NaN	NaN	0.942412	10	-0.129456	-0.691578
UC Davis	Prg3	homozygote	male	24.15	30.6708	3.1	27.8225	27.9225	21.3565	5.44445	0.1	1.74368	84.0262	77.3986	NaN	NaN	NaN	NaN	NaN	0.920417	10.75	-0.129486	-0.691741
UC Davis	Apbb2	heterozygote	male	24.15	28.22	3.1	26.948	27.044	20.7931	4.99851	0.096	1.7151	81.7792	79.2291	NaN	NaN	NaN	NaN	NaN	0.968875	11	-0.129701	-0.69289
WTSI	Rala	heterozygote	male	21.5	20.6881	3.4	30.2286	29.0286	NaN	NaN	-1.2	1.97309	96.386	82.9309	1283.91	1936.55	0.150136	0.108163	2.13578	0.860972	11.5714	-0.0939326	-0.693729
UC Davis	Endou	homozygote	male	24.15	27.0381	3.1	29.4443	30.2829	20.8173	7.72075	0.838571	1.79591	85.6848	82.7744	NaN	NaN	NaN	NaN	NaN	0.967462	10.7143	-0.129862	-0.693747
WTSI	B9d2	heterozygote	male	21.5	20.9714	3.4	30.8571	29.7429	22.134	9.02805	-1.11429	1.9789	96.8961	82.3703	1184.1	1770.49	0.138571	0.103401	1.97126	0.849572	11.5714	-0.0939924	-0.694171
WTSI	Aff3	heterozygote	male	21.5	20.9476	3.4	28.1429	27.4857	22.3724	5.86447	-0.657143	1.92898	94.1387	81.4083	1194.75	1836.86	0.164286	0.139456	2.33706	0.865749	12	-0.0940366	-0.694498
HMGU	Bcl2l15	homozygote	male	22.275	20.75	3.339	29.02	27.44	NaN	NaN	-1.58	1.94312	94.7643	82.2333	NaN	NaN	0.0995238	NaN	1.39039	0.867713	11	-0.130166	-0.695369
WTSI	2610318N02Rik	homozygote	male	21	20.4286	3.4	29.1429	28.8143	21.0678	7.83816	-0.328571	1.93361	93.9718	83.0019	508.498	748.064	0.1561	4.25306	2.22061	0.88453	11.8571	-0.0941709	-0.695489
UC Davis	Ifng	heterozygote	male	24.15	26.4714	3.1	27.2257	28.0143	21.3353	5.1311	0.788571	1.72351	81.5392	81.9011	NaN	NaN	NaN	NaN	NaN	1.00363	10.8571	-0.130303	-0.696102
WTSI	Ido2	homozygote	male	21.5	21.1429	3.4	27.8857	27.1429	22.7439	4.74666	-0.742857	1.91546	93.5865	80.4544	1033.36	1617.01	0.148435	0.116327	2.11158	0.860116	11.8571	-0.0943159	-0.69656
TCP	Fblim1	homozygote	male	26.3813	21.9542	3.1	26.8962	26.1863	21.6188	4.58218	-0.71	1.65683	80.0881	72.6618	796.028	2122.36	NaN	NaN	NaN	0.907458	10.375	-0.0945987	-0.698649
WTSI	Kdm7a	homozygote	male	21.5	21.1929	3.4	28.8857	28.4143	22.018	6.9668	-0.471429	1.96389	95.8532	82.8419	1693.13	2400.92	0.177755	0.129252	2.52867	0.864278	11.7143	-0.094705	-0.699434
WTSI	Tepsin	homozygote	male	21	21.5714	3.4	28.6857	27.9	21.4005	7.13161	-0.785714	1.92016	92.4291	85.5924	428.591	639.404	0.164966	4.03946	2.34674	0.926588	11	-0.0947084	-0.699459
TCP	Fam49b	homozygote	male	26.4	21.45	3.1	21.855	21.395	18.0591	3.54264	-0.46	1.56778	75.6064	69.3874	975.955	2370.44	0.151147	NaN	1.96044	0.919071	10.5	-0.0947252	-0.699583
UC Davis	Toporsl	homozygote	male	24.15	27.4429	3.1	28.1329	28.1214	21.2111	5.83972	-0.0114286	1.75227	84.0729	79.088	NaN	NaN	NaN	NaN	NaN	0.940262	10.5714	-0.130963	-0.699632
UC Davis	Adgrl3	homozygote	male	24.15	27.7667	3.1	26.1225	26.7825	19.9772	5.96851	0.66	1.68661	81.1424	75.3409	NaN	NaN	NaN	NaN	NaN	0.929278	10.25	-0.131421	-0.702074
UC Davis	Inf2	homozygote	male	24.15	27.119	3.1	27.6529	27.7629	20.0192	6.35446	0.11	1.73615	82.9278	79.6845	NaN	NaN	NaN	NaN	NaN	0.96413	10.7143	-0.131517	-0.702589
TCP	Mvk	heterozygote	male	26.2688	21.4958	3.1	28.2025	27.535	21.522	5.87077	-0.6675	1.68053	81.4674	72.8693	725.149	1944.9	NaN	NaN	NaN	0.895754	10.625	-0.0953718	-0.704358
TCP	Brwd1	homozygote	male	26.75	21.8625	3.1	26.6212	25.9312	20.2089	6.34192	-0.69	1.63341	78.5364	73.1304	830.516	2184.05	NaN	NaN	NaN	0.931505	10.25	-0.0955207	-0.705458
UC Davis	Il13	homozygote	male	24.15	27.9792	3.1	27.0763	27.2613	20.5664	5.52333	0.185	1.71678	82.4984	77.0285	NaN	NaN	NaN	NaN	NaN	0.932199	10.5	-0.132187	-0.706166
UC Davis	Aqp12	homozygote	male	24.15	28.5458	3.1	28.2662	28.455	20.9135	6.52269	0.18875	1.75525	84.3854	78.6187	NaN	NaN	NaN	NaN	NaN	0.93228	10.75	-0.132309	-0.706819
WTSI	Scn3b	homozygote	male	21.5	20.6905	3.4	29.7	28.9143	23.097	6.85903	-0.785714	1.97	96.9559	80.2326	1496.24	2174.3	0.14483	0.129932	2.06029	0.831694	11.7143	-0.0957748	-0.707335
UC Davis	Smim8	homozygote	male	24.15	27.3417	3.1	27.0063	27.0825	NaN	NaN	0.07625	1.71411	82.055	78.0311	NaN	NaN	NaN	NaN	NaN	0.953305	10.5	-0.132587	-0.708305
WTSI	Tm9sf4	homozygote	male	21.5	20.1476	3.4	30.0429	29.7143	22.1096	8.34328	-0.328571	1.9697	95.9374	83.7984	1380.83	1994.85	0.166916	0.126803	2.37448	0.873694	11.8571	-0.0959274	-0.708462
UC Davis	Bhlha9	homozygote	male	24.15	23.2333	3.1	26.92	27.104	NaN	NaN	0.184	1.73564	82.6012	80.7377	611.762	1109.35	0.113333	0.0622857	1.46998	0.977853	10	-0.0961711	-0.710261
HMGU	Rest	heterozygote	male	24.125	20.75	3.339	25.9	24.5167	NaN	NaN	-1.38333	1.67993	82.4365	69.2857	NaN	NaN	0.0809524	NaN	1.13094	0.841898	10.5	-0.133036	-0.710704
WTSI	Il10rb	homozygote	male	21.5	21.15	3.4	26.56	25.78	21.8158	4.43644	-0.78	1.91742	93.5846	80.8846	1682.9	2399.58	0.157111	0.110476	2.235	0.86648	11.8	-0.0962419	-0.710784
BCM	Zfp142	homozygote	male	22.75	21.2333	3.1	24.9714	25	18.184	2.9902	0.0285714	1.7678	85.6393	76.8628	NaN	NaN	NaN	NaN	NaN	0.897792	10	-0.133312	-0.712179
HMGU	Rfxank	homozygote	male	21.7857	20.75	3.339	26.5	23.3714	17.4871	6.68163	-3.12857	1.90021	92.5714	80.7755	NaN	NaN	0.108844	NaN	1.52059	0.875745	10.4286	-0.13342	-0.712757
UC Davis	Igfals	homozygote	male	24.15	26.3905	3.1	26.3471	26.2943	19.475	6.0281	-0.0528571	1.69122	81.063	76.6192	NaN	NaN	NaN	NaN	NaN	0.945589	10.1429	-0.134101	-0.716391
UC Davis	Mgl2	homozygote	male	24.15	27.7667	3.1	29.0017	29.3867	21.884	6.17684	0.385	1.7773	84.6697	82.3704	NaN	NaN	NaN	NaN	NaN	0.974223	10.6667	-0.134114	-0.716463
MRC Harwell	BC053393	heterozygote	male	17.8375	21.5208	NaN	28.05	25.2625	22.8852	4.9847	-2.7875	2.17912	105.386	95.3838	2434.17	3464.12	NaN	NaN	NaN	0.904191	10.625	-0.0971804	-0.717716
UC Davis	Med1	heterozygote	male	24.15	27.6048	3.1	29.14	29.8357	21.6636	6.43492	0.695714	1.78148	85.4184	80.6056	NaN	NaN	NaN	NaN	NaN	0.944198	11	-0.134421	-0.718103
HMGU	Car14	homozygote	male	21.8786	20.8571	3.339	26.6143	25.7571	16.7774	7.25659	-0.857143	1.89489	92.065	81.4308	NaN	NaN	0.119728	NaN	1.67264	0.881609	10.8571	-0.134458	-0.718303
UC Davis	Dleu7	homozygote	male	24.15	27.9286	3.1	33.0786	32.5343	23.8347	8.44049	-0.544286	1.90891	92.0524	84.5037	NaN	NaN	NaN	NaN	NaN	0.918468	11	-0.134739	-0.719804
MRC Harwell	Pawr	heterozygote	male	20.1562	21.65	NaN	25.5	23.9662	19.2997	6.24404	-1.53375	2.00181	96.8149	87.6099	2360.89	3334.91	NaN	NaN	NaN	0.904548	10.25	-0.0977262	-0.721746
WTSI	Dpm1	heterozygote	male	21	20.5714	3.4	30.1857	29.0714	23.8521	6.17251	-1.11429	1.94227	93.0744	88.0714	351.487	541.771	0.156757	3.61497	2.22997	0.946558	11	-0.0978639	-0.722764
HMGU	Aldh2	homozygote	male	22.25	20.75	3.339	26.3	24.7	19.6579	3.6661	-1.6	1.85191	90.1349	79.0198	NaN	NaN	0.107937	NaN	1.50791	0.877249	11	-0.135299	-0.722795
WTSI	Prrc2b	heterozygote	male	21	23.2857	3.4	29.2143	28.2143	21.6257	7.31875	-1	1.92768	93.2077	84.4439	434.945	654.073	0.147619	3.96395	2.09997	0.906035	11.1429	-0.0979358	-0.723295
MRC Harwell	Mapkapk2	homozygote	male	19.0375	20.7	NaN	23.3625	22.035	18.1024	4.19607	-1.3275	2.03963	99.4	86.5714	2777.75	3874.52	NaN	NaN	NaN	0.870552	10.25	-0.0981771	-0.725077
MRC Harwell	Treml1	homozygote	male	18.1812	21.9229	NaN	29.0125	27.9913	22.5226	6.2847	-1.02125	2.18109	105.612	95.0069	2460.35	3534.34	NaN	NaN	NaN	0.898384	10.375	-0.0982369	-0.725519
WTSI	Phtf2	homozygote	male	21.5	20.8667	3.4	30.05	28.95	22.5426	7.46823	-1.1	1.96294	96.3983	80.6948	1270.15	1880.48	0.138466	0.112698	1.96976	0.838163	11.6667	-0.0985205	-0.727613
UC Davis	Prf1	homozygote	male	24.15	27.0381	3.1	27.1471	27.6557	19.8066	6.27824	0.508571	1.715	81.4682	80.3143	NaN	NaN	NaN	NaN	NaN	0.985424	10.8571	-0.136268	-0.727968
UC Davis	Unc119b	homozygote	male	24.15	27.281	3.1	27.0271	27.7171	19.9475	5.95314	0.69	1.71077	81.5079	79.2599	NaN	NaN	NaN	NaN	NaN	0.973712	10.7143	-0.1366	-0.729742
HMGU	Aspn	homozygote	male	22.3313	20.75	3.339	23.2375	22.1875	14.211	5.77742	-1.05	1.74417	84.7485	74.9301	NaN	NaN	0.115476	NaN	1.61325	0.884945	10	-0.136723	-0.730402
HMGU	Adprm	homozygote	male	22.5	20.75	3.339	24.0833	21.6667	18.9914	2.74124	-2.41667	1.75657	85.9444	73.3492	NaN	NaN	0.0746032	NaN	1.04223	0.853036	10.8333	-0.137238	-0.733152
WTSI	Trim29	homozygote	male	21	21	3.4	28.1714	27.3429	21.3465	6.93485	-0.828571	1.90105	92.8244	80.0545	348.916	524.084	0.136372	4	1.93997	0.863697	11.4286	-0.0995522	-0.735232
MRC Harwell	Rbms1	heterozygote	male	20.5938	21.6958	NaN	25.35	24.5063	18.9518	4.49563	-0.84375	1.97445	95.4599	86.5251	2307.43	3348.71	NaN	NaN	NaN	0.905857	10.25	-0.0995623	-0.735307
MRC Harwell	Poln	homozygote	male	20.1	21.7	NaN	25.56	23.5	19.3199	5.44695	-2.06	2.01167	97.4872	87.3447	2524.87	3542.75	NaN	NaN	NaN	0.895813	11	-0.0998267	-0.73726
UC Davis	Spink2	homozygote	male	24.15	23.2333	3.1	28.38	29.005	NaN	NaN	0.625	1.74588	83.4721	79.8488	309.548	731.702	0.0954762	0.0578571	1.23836	0.956736	10	-0.0998751	-0.737617
TCP	Nobox	heterozygote	male	27.2125	21.3125	3.1	26.4125	26.765	20.4235	5.33274	0.3525	1.65849	79.4121	75.43	1585.75	3722.79	0.161162	NaN	2.09033	0.951241	11	-0.0998762	-0.737625
UC Davis	Gdap1	homozygote	male	24.15	30.0333	3.1	25.8614	24.7986	19.4817	5.60631	-1.06286	1.67144	81.1671	71.976	NaN	NaN	NaN	NaN	NaN	0.884269	11	-0.138118	-0.737852
ICS	Atxn7l3	heterozygote	male	21	21	3.145	23.1667	23.4	16.0331	2.38665	0.233333	1.82896	88.4848	79.9394	745.788	1186.39	0.210317	0.125476	2.7675	0.903577	10	-0.100008	-0.738601
UC Davis	Pax7	heterozygote	male	24.15	26.7952	3.1	27.5371	27.8371	20.552	5.86739	0.3	1.72544	83.0371	76.9807	NaN	NaN	NaN	NaN	NaN	0.927766	11	-0.138474	-0.739757
BCM	Prdm14	heterozygote	male	22.75	21.2333	3.1	27.68	27.8	20.2714	3.82134	0.12	1.85021	88.7545	83.57	NaN	NaN	NaN	NaN	NaN	0.940315	10.4	-0.138758	-0.741274
ICS	Rab19	homozygote	male	21	21	3.145	22.8714	23.6429	16.1593	1.70783	0.771429	1.82282	87.4365	82.3488	732.351	1184.56	0.251905	0.165646	3.31473	0.941574	9.57143	-0.100379	-0.741338
UC Davis	Gprc6a	homozygote	male	24.15	26.35	3.1	28.6288	28.245	20.1765	7.63131	-0.38375	1.76039	84.7471	78.4406	NaN	NaN	NaN	NaN	NaN	0.923894	10.375	-0.138928	-0.742178
UC Davis	5830411N06Rik	homozygote	male	24.15	26.6333	3.1	27.4529	27.6414	19.7054	7.04941	0.188571	1.72194	81.1448	82.968	NaN	NaN	NaN	NaN	NaN	1.06496	10.4286	-0.139235	-0.74382
UC Davis	Gpr50	hemizygote	male	24.15	28.3333	3.1	30.8	31.45	NaN	NaN	0.65	1.83043	87.4744	83.8575	NaN	NaN	NaN	NaN	NaN	0.960157	11	-0.139313	-0.744236
HMGU	Gdi2	heterozygote	male	22.1187	20.6562	3.339	25.3375	24.5875	15.5708	6.31904	-0.75	1.82772	88.7768	78.6321	NaN	NaN	0.11369	NaN	1.5883	0.885475	10.25	-0.139559	-0.74555
WTSI	Tatdn3	homozygote	male	21	21.2857	3.4	30.4714	29.9857	22.0135	8.46663	-0.485714	1.94955	94.7062	83.8299	461.175	680.914	0.174286	3.92381	2.47932	0.885298	11.2857	-0.101337	-0.748411
MRC Harwell	Gpr1	homozygote	male	19.6	21.35	NaN	22.8	21.955	NaN	NaN	-0.845	2.04654	99.4113	88.0242	3839.52	5220.71	NaN	NaN	NaN	0.892453	11	-0.101338	-0.748424
WTSI	Pop4	heterozygote	male	21.5	21.0095	3.4	28.6714	27.6714	21.6972	6.70528	-1	1.94292	94.5408	82.988	1439.96	2130.36	0.164558	0.123129	2.34093	0.878167	11.8571	-0.101347	-0.748488
HMGU	Rnf10	homozygote	male	24.2875	20.75	3.339	21.25	20.525	13.5326	4.85068	-0.725	1.50801	73.503	63.9673	NaN	NaN	0.0988095	NaN	1.38041	0.869763	10	-0.140157	-0.748744
BCM	Nxn	heterozygote	male	22.75	21.2333	3.1	24.9429	24.8381	17.6549	3.49643	-0.104762	1.76	85.0064	77.4328	NaN	NaN	NaN	NaN	NaN	0.914862	10.381	-0.140183	-0.748884
UC Davis	2700054A10Rik	homozygote	male	24.15	26.6333	3.1	26.5688	27.0675	19.4946	6.31108	0.49875	1.69201	80.6704	78.1908	NaN	NaN	NaN	NaN	NaN	0.970432	10.75	-0.140489	-0.750519
TCP	Mamld1	hemizygote	male	22	21.2667	3.1	26.985	24.885	19.2125	6.7986	-2.1	1.89023	93.3893	75.7048	NaN	NaN	NaN	NaN	NaN	0.810747	11	-0.140698	-0.751635
WTSI	Cyp3a11	homozygote	male	21.5	20.881	3.4	28.9286	28.5857	22.6218	6.72554	-0.342857	1.92529	93.4042	83.2281	978.136	1542.26	0.176281	0.129932	2.50771	0.891303	11	-0.101795	-0.751795
HMGU	Miga1	homozygote	male	24.3889	20.75	3.339	23.9333	22.3778	NaN	NaN	-1.55556	1.58546	77.5093	66.4286	NaN	NaN	0.0857143	NaN	1.19746	0.854463	10.7778	-0.141018	-0.753346
WTSI	Stard8	hemizygote	male	21	20.9286	3.4	29.2786	28.7214	21.1114	8.19267	-0.557143	1.92519	94.051	80.9007	440.022	665.21	0.15574	3.95884	2.21549	0.859937	11.5	-0.102087	-0.753949
KMPC	Cav3	homozygote	male	22	20	NaN	28.0971	27.6571	21.1246	6.61214	-0.44	2.05251	99.1922	90.0955	2315.85	6068.8	0.180556	0.132109	NaN	0.907459	10.8571	-0.102514	-0.757106
HMGU	Mybbp1a	heterozygote	male	23.375	20.75	3.339	26.5125	25.3125	NaN	NaN	-1.2	1.75557	85.936	73.1622	NaN	NaN	0.0869048	NaN	1.21409	0.852253	10.375	-0.14177	-0.75736
TCP	Uhrf2	heterozygote	male	25.0333	21.45	3.1	27.465	26.72	21.9702	5.12254	-0.745	1.75325	84.7527	76.8774	1017.23	2710.4	0.153333	NaN	1.98879	0.907987	10.5	-0.102617	-0.75787
UC Davis	Prpf18	heterozygote	male	24.15	27.9905	3.1	29.8443	29.9386	21.9039	6.88471	0.0942857	1.79674	85.8946	82.2071	NaN	NaN	NaN	NaN	NaN	0.956349	10.5714	-0.142001	-0.758598
WTSI	Smpd4	heterozygote	male	21	21	3.4	32.2	31.7	23.142	9.98487	-0.5	1.9719	96.0736	83.7873	293	435	0.153333	3.65714	2.18126	0.872115	11	-0.10308	-0.761289
BCM	Fmc1	homozygote	male	22.75	22	3.1	17.6	17.45	NaN	NaN	-0.15	1.51946	72.7453	69.1415	NaN	NaN	NaN	NaN	NaN	0.950447	10	-0.142565	-0.761612
WTSI	Cmtm6	homozygote	male	21.5	21	3.4	30.0286	29.4714	22.9896	7.184	-0.557143	1.95796	95.1913	83.9191	1260.74	1882.07	0.172653	0.121769	2.45609	0.882054	11.7143	-0.10315	-0.761802
UC Davis	Fndc9	homozygote	male	24.15	26.7952	3.1	29.61	30.2414	19.3738	9.44696	0.631429	1.78851	85.3262	82.454	NaN	NaN	NaN	NaN	NaN	0.965929	10.7143	-0.142632	-0.76197
WTSI	Tcf4	heterozygote	male	21.5	21	3.4	29.3857	29.0571	21.3537	7.83	-0.328571	1.97574	96.2965	83.8238	1951.67	2685.54	0.18093	0.132653	2.57383	0.871769	11.5714	-0.103215	-0.762281
UC Davis	Chst8	homozygote	male	24.15	23.2333	3.1	22.83	24.09	NaN	NaN	1.26	1.64413	78.4141	75.883	408.476	962.905	0.105476	0.074	1.36807	0.967722	11	-0.103245	-0.762505
UC Davis	Fam184b	homozygote	male	24.15	30.7619	3.1	28.5043	28.0514	20.5271	7.06196	-0.452857	1.75238	84.3405	78.1586	NaN	NaN	NaN	NaN	NaN	0.927434	10.5714	-0.1429	-0.763401
HMGU	Ldah	homozygote	male	24.1	20.75	3.339	26.5875	25.225	NaN	NaN	-1.3625	1.69447	82.7693	71.2426	NaN	NaN	0.0952381	NaN	1.33051	0.860275	10.5	-0.142941	-0.763621
UC Davis	Gnaz	heterozygote	male	24.15	25.6619	3.1	29.8257	30.04	20.9771	8.1919	0.214286	1.79506	85.4981	83.2569	NaN	NaN	NaN	NaN	NaN	0.975507	10.2857	-0.14308	-0.764359
UC Davis	Gpsm1	homozygote	male	24.15	28.7854	3.1	27.0957	27.2743	20.2267	5.35289	0.178571	1.70639	82.0519	76.375	NaN	NaN	NaN	NaN	NaN	0.930932	11	-0.143203	-0.765021
MRC Harwell	Col4a3	homozygote	male	19.7	21.68	NaN	26.24	24.414	20.3097	4.90079	-1.826	2.07978	101.886	86.3886	3340.01	4546.97	NaN	NaN	NaN	0.847561	11	-0.103812	-0.766695
MRC Harwell	Frs2	heterozygote	male	19.7	21.4667	NaN	24.825	24.2	18.6115	6.22257	-0.625	2.02878	98.2479	88.3316	2792.07	3922.86	NaN	NaN	NaN	0.898986	10.875	-0.104014	-0.768184
UC Davis	Bbox1	homozygote	male	24.15	26.5625	3.1	27.25	26.635	NaN	NaN	-0.615	1.71037	82.0607	77.2028	NaN	NaN	NaN	NaN	NaN	0.938999	10.75	-0.144232	-0.770517
UC Davis	P3h1	homozygote	male	24.15	26.6333	3.1	22.84	22.0943	18.0949	4.29806	-0.745714	1.5672	75.4711	69.7446	NaN	NaN	NaN	NaN	NaN	0.924036	10	-0.144367	-0.771237
MRC Harwell	Otub1	heterozygote	male	19.7917	21	NaN	25.75	23.5933	18.4459	6.18088	-2.15667	2.07432	101.606	86.2078	3539.15	4799.26	NaN	NaN	NaN	0.848609	11	-0.104467	-0.771533
WTSI	Ralb	homozygote	male	21.5	20.9	3.4	29.6429	28.7429	23.4736	6.06907	-0.9	1.94952	95.0349	82.6536	1288.07	1891.9	0.153827	0.104082	2.18827	0.870622	12	-0.104512	-0.771864
WTSI	Ahcyl1	homozygote	male	21.5	21.1762	3.4	24.1143	23.9429	19.1001	4.71857	-0.171429	1.85477	90.3553	78.8517	1532.54	2209.79	0.156412	0.123129	2.22505	0.873137	11.1429	-0.104561	-0.772221
UC Davis	Ube2e2	homozygote	male	24.15	36.55	3.1	28.57	29.32	21.9625	5.16665	0.75	1.74669	82.8808	82.1308	361.31	784.701	0.110355	0.0559881	1.43135	0.989403	11	-0.104727	-0.773448
UC Davis	Elmo3	homozygote	male	24.15	26.7952	3.1	29.1	29.5529	20.806	7.20346	0.452857	1.76945	84.9061	79.831	NaN	NaN	NaN	NaN	NaN	0.939852	11	-0.145157	-0.775454
UC Davis	Prkcq	homozygote	male	24.15	27.54	3.1	26.17	26.252	20.2679	4.81516	0.082	1.67426	80.4867	75.008	NaN	NaN	NaN	NaN	NaN	0.932833	10.8	-0.145314	-0.776295
UC Davis	Zswim5	homozygote	male	24.15	26.8222	3.1	27.7267	27.9017	21.9513	4.96805	0.175	1.72472	82.7674	77.7855	NaN	NaN	NaN	NaN	NaN	0.939925	10.6667	-0.145343	-0.776451
WTSI	Pth	homozygote	male	21.5	21.1238	3.4	27.7857	27.1857	22.5124	5.07105	-0.6	1.92122	92.9517	83.9599	1441.67	2108.36	0.172874	0.142177	2.45924	0.902841	11.5714	-0.105134	-0.776454
BCM	Rps6kc1	homozygote	male	22.75	21.2333	3.1	25.1	24.3667	18.3152	3.39206	-0.733333	1.75982	84.4795	79.2706	NaN	NaN	NaN	NaN	NaN	0.935507	11	-0.145464	-0.777096
HMGU	Slc2a5	homozygote	male	22.4	20.75	3.339	23.7167	23.4	14.5872	5.82752	-0.316667	1.74488	84.0278	77.6528	NaN	NaN	0.15873	NaN	2.21752	0.924879	10.5	-0.145636	-0.778017
UC Davis	C3ar1	homozygote	male	24.15	26.2556	3.1	29.3767	30.0967	20.8005	7.615	0.72	1.77767	84.4749	83.1455	NaN	NaN	NaN	NaN	NaN	0.983829	11	-0.145902	-0.779436
UC Davis	B4gat1	heterozygote	male	24.15	24.9	3.1	27.295	26.62	21.5206	4.30592	-0.675	1.70424	81.6734	77.2592	115.685	339.714	0.0554167	0.0267857	0.718776	0.945984	11	-0.105822	-0.781535
WTSI	Crb2	heterozygote	male	21.5	20.5095	3.4	28.2571	27.9	22.7735	5.21771	-0.357143	1.93722	94.0014	83.6763	1592.27	2318.65	0.179172	0.140816	2.54883	0.890457	12	-0.106151	-0.783967
HMGU	Etfdh	heterozygote	male	22.3	20.75	3.339	28.3375	27.5375	17.1493	8.84467	-0.8	1.90214	92.8542	80.1845	NaN	NaN	0.119643	NaN	1.67146	0.8631	10	-0.146856	-0.784532
[truncated: 516 more rows]

## Sheet: females
institution	strain	zygosity	sex	room_temp	duration	diet_kcal	total_mass_1	total_mass_2	lean_mass	fat_mass	mass_change	ee	vo2	vco2	amb_act	loc_act	food_intake	water_intake	energy_intake	rer	age_in_weeks	resid	sd
ICS	Ppp6c	heterozygote	female	21	21	3.145	20.6286	21.0143	12.9853	1.45033	0.385714	2.79934	138.665	110.833	1025.92	1562.4	0.234898	0.14517	3.09095	0.800635	11	0.845467	5.81228
BCM	Dgcr2	homozygote	female	22.75	21	3.1	18.6667	19.2667	12.887	2.28558	0.6	2.57006	122.874	117.552	NaN	NaN	NaN	NaN	NaN	0.959957	10	0.850036	3.90009
ICS	Tiam1	homozygote	female	21	21	3.145	19.5833	20.2667	13.5269	1.43692	0.683333	2.44829	116.561	113.734	1442.1	2126.31	0.263651	0.153619	3.4693	0.974883	10	0.531329	3.6527
BCM	Clic5	homozygote	female	22.75	21.2333	3.1	18.88	18.7	13.4196	2.45172	-0.18	2.52128	121.227	112.878	NaN	NaN	NaN	NaN	NaN	0.935856	10.6	0.793799	3.64207
BCM	Ap4e1	homozygote	female	22.75	21.14	3.1	22.24	21.5	15.7501	2.82217	-0.74	2.60537	125.692	115.143	NaN	NaN	NaN	NaN	NaN	0.918722	10	0.760522	3.48939
BCM	Ckap4	homozygote	female	22.75	23	3.1	17.7	17.95	12.5552	2.13014	0.25	2.42475	114.585	115.689	NaN	NaN	NaN	NaN	NaN	1.00684	10	0.738494	3.38832
BCM	Pyroxd1	heterozygote	female	22.75	21	3.1	20.8857	20.6	14.5475	2.70749	-0.285714	2.53384	121.449	114.803	NaN	NaN	NaN	NaN	NaN	0.946093	10.4286	0.736297	3.37824
BCM	Ckap4	heterozygote	female	22.75	22	3.1	20.4	19.6	14.1009	2.57973	-0.8	2.50673	120.144	113.596	NaN	NaN	NaN	NaN	NaN	0.946027	11	0.726157	3.33172
BCM	Dnajc15	homozygote	female	22.75	21	3.1	21.2333	21.0333	14.4793	3.52739	-0.2	2.53031	120.875	116.085	NaN	NaN	NaN	NaN	NaN	0.961789	10.3333	0.720627	3.30635
BCM	Tbx10	homozygote	female	22.75	21.5	3.1	20.45	20.25	14.5244	2.68822	-0.2	2.47456	118.757	111.585	NaN	NaN	NaN	NaN	NaN	0.940924	10.25	0.692237	3.17609
BCM	Nr6a1	heterozygote	female	22.75	22.5	3.1	19.45	20.1	13.4003	2.51084	0.65	2.42285	115.066	113.563	NaN	NaN	NaN	NaN	NaN	0.987337	10.75	0.675459	3.09911
BCM	Abca1	heterozygote	female	22.75	22	3.1	20.5714	20.8714	14.384	2.82507	0.3	2.44603	117.236	110.839	NaN	NaN	NaN	NaN	NaN	0.947543	10	0.659463	3.02571
ICS	Rwdd2b	homozygote	female	21	21	3.145	20.68	21.28	NaN	NaN	0.6	2.39318	114.2	110.236	1301.67	1948.99	0.281143	0.151619	3.69947	0.965363	11	0.433944	2.98321
BCM	Anapc4	heterozygote	female	22.75	21.1429	3.1	21.8857	21.5571	15.2611	3.00625	-0.328571	2.48153	118.54	113.866	NaN	NaN	NaN	NaN	NaN	0.962119	10.2857	0.649056	2.97796
ICS	Rbfox1	heterozygote	female	21	21	3.145	19.22	20.16	12.8946	1.91422	0.94	2.31889	110.327	107.982	1049.6	1603.49	0.273524	0.148571	3.59921	0.979441	10.2	0.420906	2.89358
ICS	Gm12258	homozygote	female	21	20.75	3.145	20.85	21.475	14.3657	1.25072	0.625	2.36967	118.772	88.863	1058.45	1609.78	0.269524	0.127143	3.54658	0.747721	10	0.406542	2.79483
ICS	Nlk	heterozygote	female	21	21	3.145	20.5286	20.5714	NaN	NaN	0.0428571	2.33402	111.688	106.403	1407.38	2054.41	0.24483	0.114921	3.22164	0.952395	10	0.379933	2.6119
ICS	Stradb	homozygote	female	21	21	3.145	20.9714	21.8857	14.5917	2.07693	0.914286	2.34884	111.597	109.929	1241.66	1874.83	0.295714	0.16246	3.89121	0.98466	10.2857	0.378602	2.60276
BCM	Arhgap33	heterozygote	female	22.75	21	3.1	20.3286	19.8857	14.0659	2.72654	-0.442857	2.32884	111.329	106.562	NaN	NaN	NaN	NaN	NaN	0.958066	10.5714	0.550761	2.52698
KMPC	Dnase1l2	homozygote	female	22	20	NaN	18.825	18.9975	15.7398	2.45968	0.1725	2.31163	110.463	105.929	NaN	NaN	0.2025	0.159643	NaN	0.959185	11	0.53061	2.43452
BCM	Tead1	heterozygote	female	22.75	21.4	3.1	22.15	21.56	14.9788	4.3801	-0.59	2.3562	114.247	102.079	NaN	NaN	NaN	NaN	NaN	0.89427	10.4	0.514495	2.36058
ICS	Saxo1	homozygote	female	21	21	3.145	22.0571	22.9571	15.0452	2.00504	0.9	2.35085	111.39	111.104	1100.06	1686.68	0.284694	0.16483	3.7462	0.99789	11.2857	0.33887	2.32961
BCM	Sbk1	homozygote	female	22.75	21.2333	3.1	20.75	19.05	14.7198	2.71319	-1.7	2.29843	102.459	131.6	NaN	NaN	NaN	NaN	NaN	1.29462	11	0.505633	2.31992
BCM	Trim59	homozygote	female	22.75	21.2333	3.1	20.05	20.15	NaN	NaN	0.1	2.2468	100.162	128.623	NaN	NaN	NaN	NaN	NaN	1.3417	10.25	0.478447	2.19519
BCM	Ccdc114	heterozygote	female	22.75	21.0476	3.1	21.1571	20.8571	15.1207	2.56761	-0.3	2.27495	109.643	100.926	NaN	NaN	NaN	NaN	NaN	0.920462	10.4286	0.467929	2.14693
ICS	Pik3ap1	homozygote	female	21	21	3.145	21.01	21.43	16.0362	2.591	0.42	2.27853	109.25	103.1	1194.63	1783.7	0.272143	0.128393	3.58104	0.944521	10	0.307535	2.1142
ICS	Hmgn1	homozygote	female	21	21	3.145	20.7125	21.325	13.9537	2.51239	0.6125	2.2657	107.875	105.226	1240.15	1865.89	0.24375	0.125034	3.20743	0.9752	10	0.305877	2.10279
ICS	Fam207a	homozygote	female	21	21	3.145	20.4333	20.8667	NaN	NaN	0.433333	2.24731	108.447	99.2129	995.371	1522.69	0.265635	0.135048	3.4954	0.914675	10	0.301565	2.07315
BCM	Car13	homozygote	female	22.75	21.2333	3.1	19.4857	19.6286	13.6995	2.55063	0.142857	2.19681	105.835	97.6085	NaN	NaN	NaN	NaN	NaN	0.921819	10.5714	0.448172	2.05628
ICS	Elk3	heterozygote	female	21	20	3.145	20.7833	21.5	NaN	NaN	0.716667	2.25525	106.539	107.729	932.083	1439.59	0.279048	0.155714	3.6719	1.0111	10.8333	0.296244	2.03657
BCM	Pde12	heterozygote	female	22.75	21	3.1	21.1125	20.9875	15.0864	2.79774	-0.125	2.2443	107.558	101.731	NaN	NaN	NaN	NaN	NaN	0.946353	10.125	0.438839	2.01346
BCM	Ntn4	homozygote	female	22.75	21	3.1	20.5833	19.8833	14.8419	2.60613	-0.7	2.22575	107.323	98.561	NaN	NaN	NaN	NaN	NaN	0.919005	10.6667	0.438774	2.01316
BCM	Fastkd2	homozygote	female	22.75	21.2333	3.1	20.74	20.72	14.6537	2.67271	-0.02	2.22649	106.856	100.383	NaN	NaN	NaN	NaN	NaN	0.942427	10.4	0.434043	1.99145
BCM	Hyal4	homozygote	female	22.75	20.4286	3.1	20.8143	21.0143	14.6114	2.59522	0.2	2.22253	105.698	103.652	NaN	NaN	NaN	NaN	NaN	0.982008	10.4286	0.427478	1.96133
BCM	Wdr59	heterozygote	female	22.75	21	3.1	20.8571	20.7571	14.5201	2.82985	-0.1	2.2231	106.836	99.7224	NaN	NaN	NaN	NaN	NaN	0.932376	10	0.426561	1.95712
BCM	Rfx8	homozygote	female	22.75	21.2333	3.1	21.4429	21.2286	15.1291	2.85289	-0.214286	2.23225	107.656	98.7795	NaN	NaN	NaN	NaN	NaN	0.919805	10.2857	0.415246	1.90521
BCM	Prg2	homozygote	female	22.75	21.2333	3.1	20.025	19.45	13.9043	2.72583	-0.575	2.17734	90.5368	147.912	NaN	NaN	NaN	NaN	NaN	1.6337	11	0.409864	1.88052
ICS	Nrp1	heterozygote	female	21	21	3.145	20.0625	20.5	NaN	NaN	0.4375	2.20732	105.176	102.227	1311.28	1938.85	0.239405	0.118027	3.15025	0.971498	10	0.27283	1.87561
ICS	Cdkl5	homozygote	female	21	21	3.145	18.5167	19.4333	NaN	NaN	0.916667	2.13611	102.197	97.4545	840.652	1365.33	0.247937	0.131619	3.26252	0.953428	9.33333	0.268251	1.84413
BCM	Mrpl33	heterozygote	female	22.75	21.2333	3.1	20.6	20.3714	14.5243	2.76822	-0.228571	2.17968	105.611	94.7045	NaN	NaN	NaN	NaN	NaN	0.897293	11	0.392121	1.79911
HMGU	Rora	homozygote	female	24.5	20.75	3.339	22	21.7	NaN	NaN	-0.3	2.09895	102.202	89.4048	NaN	NaN	0.128571	NaN	1.79619	0.874782	10	0.391891	1.79805
BCM	Asb8	homozygote	female	22.75	21.2333	3.1	18.9714	18.8857	13.2373	2.64539	-0.0857143	2.12011	102.629	92.4549	NaN	NaN	NaN	NaN	NaN	0.901148	10	0.389433	1.78678
BCM	Hoxb13	heterozygote	female	22.75	21.2333	3.1	21.4333	20.9	15.3395	2.66632	-0.533333	2.20486	106.803	95.897	NaN	NaN	NaN	NaN	NaN	0.897885	11	0.388188	1.78107
BCM	Wdr1	heterozygote	female	22.75	21.2333	3.1	21.6	21.3429	15.0517	2.96929	-0.257143	2.20725	106.911	96.0278	NaN	NaN	NaN	NaN	NaN	0.900152	10.8571	0.384753	1.7653
BCM	Alg14	heterozygote	female	22.75	21.2333	3.1	21.9571	21.6571	15.6214	2.80215	-0.3	2.21696	106.592	99.2654	NaN	NaN	NaN	NaN	NaN	0.931634	11	0.381991	1.75263
BCM	Bicdl1	heterozygote	female	22.75	21.2333	3.1	19.7	19.475	13.9339	2.65097	-0.225	2.13222	103.156	93.1978	NaN	NaN	NaN	NaN	NaN	0.904745	10.5	0.376098	1.72559
ICS	Dcaf7	heterozygote	female	21	21	3.145	20.5375	20.6125	13.2993	2.40829	0.075	2.2016	105.273	100.648	1121.21	1698.65	0.232024	0.129524	3.05313	0.955059	10	0.2502	1.72004
ICS	Rrp1b	homozygote	female	21	21	3.145	21.8	21.4	16.9757	2.1364	-0.4	2.32789	112.909	100.727	NaN	NaN	0.189524	0.0942857	2.49388	0.892109	11	0.369005	1.69305
BCM	4930451I11Rik	homozygote	female	22.75	21.2333	3.1	20.82	20.74	14.5995	2.60999	-0.08	2.16355	104.212	96.2041	NaN	NaN	NaN	NaN	NaN	0.922868	10.2	0.368299	1.68981
BCM	Smdt1	heterozygote	female	22.75	21	3.1	20.9429	20.6286	14.7931	2.80816	-0.314286	2.16735	104.619	95.5771	NaN	NaN	NaN	NaN	NaN	0.913785	10	0.367815	1.68759
ICS	Lrrc3	homozygote	female	21	21	3.145	20.8286	21.7857	16.8195	1.78082	0.957143	2.20548	104.994	102.481	964.519	1508.91	0.277143	0.152381	3.64683	0.976517	11	0.244077	1.67794
BCM	Rims3	homozygote	female	22.75	21.2333	3.1	22.1286	22.2429	15.231	3.00813	0.114286	2.20346	105.498	100.246	NaN	NaN	NaN	NaN	NaN	0.950305	10	0.362502	1.66321
BCM	Defb47	homozygote	female	22.75	21.2333	3.1	19.9857	20.0571	13.9451	2.86993	0.0714286	2.1258	102.86	92.8632	NaN	NaN	NaN	NaN	NaN	0.905559	10.5714	0.359697	1.65034
BCM	Nme7	homozygote	female	22.75	21.2333	3.1	21	20.9	15.0531	2.50885	-0.1	2.15937	102.866	100.094	NaN	NaN	NaN	NaN	NaN	0.973053	10	0.357832	1.64179
BCM	Rbm34	homozygote	female	22.75	21.2333	3.1	20.7	20.52	14.2526	3.05266	-0.18	2.14874	101.262	103.517	NaN	NaN	NaN	NaN	NaN	1.05582	11	0.357685	1.64111
TCP	Rnf10	homozygote	female	26.3333	21.6333	3.1	19.44	19.73	15.552	3.33858	0.29	1.80946	87.5508	79.0533	2727.77	6173.37	0.139545	NaN	1.80996	0.9021	10.6667	0.238566	1.64006
BCM	Ell3	homozygote	female	22.75	21.2333	3.1	22.14	22.42	15.266	3.4001	0.28	2.19647	105.4	99.0844	NaN	NaN	NaN	NaN	NaN	0.93953	11	0.35511	1.6293
BCM	Ginm1	homozygote	female	22.75	21.2333	3.1	22.28	22.06	15.6966	3.21333	-0.22	2.19726	105.313	99.5627	NaN	NaN	NaN	NaN	NaN	0.947715	10.8	0.35101	1.61049
BCM	Snrnp27	heterozygote	female	22.75	21	3.1	21.025	20.975	14.9309	2.70272	-0.05	2.15321	102.764	99.1276	NaN	NaN	NaN	NaN	NaN	0.964625	10.5	0.350801	1.60953
BCM	Ccdc180	homozygote	female	22.75	21.2333	3.1	22.2	22.0857	15.6518	3.00708	-0.114286	2.19294	105.952	96.3541	NaN	NaN	NaN	NaN	NaN	0.909283	11	0.349484	1.60348
BCM	Cts6	homozygote	female	22.75	21.2857	3.1	20.3571	20.6286	14.3561	2.56913	0.271429	2.12495	101.776	96.5409	NaN	NaN	NaN	NaN	NaN	0.949308	10	0.345871	1.58691
BCM	Tarbp1	homozygote	female	22.75	21.2333	3.1	20.475	20.35	14.4521	2.75824	-0.125	2.12671	102.04	95.9837	NaN	NaN	NaN	NaN	NaN	0.942852	10.75	0.343518	1.57611
ICS	Gpr108	homozygote	female	21	21	3.145	20.6625	20.95	13.8268	2.11343	0.2875	2.18392	103.994	101.381	1095.03	1657.73	0.254405	0.106032	3.34763	0.975282	10	0.22787	1.56653
HMGU	Lsm1	homozygote	female	24.25	20.75	3.339	20.7875	19.4375	NaN	NaN	-1.35	2.02418	99.0699	84.4077	NaN	NaN	0.106548	NaN	1.48851	0.851685	10.75	0.340984	1.56448
KMPC	Rnf10	homozygote	female	22	20	NaN	18.085	19.07	NaN	NaN	0.985	2.07205	97.911	98.883	4761.14	8987.74	0.211131	0.179643	NaN	1.00981	11	0.226556	1.55749
HMGU	Sgip1	homozygote	female	24.1	20.75	3.339	21.9286	20.7429	NaN	NaN	-1.18571	2.07231	100.978	88.0102	NaN	NaN	0.12381	NaN	1.72967	0.87287	10.7143	0.338164	1.55154
BCM	Aph1a	heterozygote	female	22.75	21.2333	3.1	20.3714	20.8429	14.6048	2.50199	0.471429	2.11609	100.51	99.1405	NaN	NaN	NaN	NaN	NaN	0.987127	10.1429	0.336514	1.54398
BCM	Trib1	homozygote	female	22.75	21.2333	3.1	20.075	20.25	14.6441	2.45604	0.175	2.10406	100.499	96.5781	NaN	NaN	NaN	NaN	NaN	0.961836	10.75	0.334832	1.53626
ICS	Icos	homozygote	female	21	21	3.145	19.85	20.5	NaN	NaN	0.65	2.14087	101.609	100.579	793.25	1260.17	0.241825	0.121905	3.1821	0.98976	9.83333	0.22067	1.51703
BCM	Rhoh	homozygote	female	22.75	21.2333	3.1	20.6	21.7	14.6106	2.81322	1.1	2.11743	100.907	98.0148	NaN	NaN	NaN	NaN	NaN	0.971338	11	0.329873	1.5135
BCM	Il3	homozygote	female	22.75	21.2333	3.1	19.5	19.9333	13.7157	2.52898	0.433333	2.07618	99.1634	95.3135	NaN	NaN	NaN	NaN	NaN	0.960936	10.6667	0.327046	1.50054
BCM	Ppara	homozygote	female	22.75	21.2333	3.1	21.48	21.82	15.217	2.92018	0.34	2.14399	102.148	99.3307	NaN	NaN	NaN	NaN	NaN	0.971049	10.6	0.325686	1.4943
BCM	Nup133	heterozygote	female	22.75	21.2333	3.1	20.8857	20.1429	15.0142	2.51831	-0.742857	2.1227	102.235	94.4204	NaN	NaN	NaN	NaN	NaN	0.923627	11	0.325153	1.49185
BCM	Sirpa	homozygote	female	22.75	20.5286	3.1	20.9714	21.4286	14.7502	3.00861	0.457143	2.12529	101.629	97.1393	NaN	NaN	NaN	NaN	NaN	0.952966	10.7143	0.324758	1.49004
RBRC	Ube2g1	homozygote	female	23	19.881	3.339	21.8429	21.3429	NaN	NaN	-0.5	2.0646	100.058	89.623	465.83	466.354	0.158214	0.194095	2.21031	0.896032	11	0.21221	1.45887
BCM	Sbk1	heterozygote	female	22.75	21.2333	3.1	20	20.04	13.905	2.78392	0.04	2.08435	99.645	95.3624	NaN	NaN	NaN	NaN	NaN	0.957317	10	0.317748	1.45787
BCM	Dhx40	homozygote	female	22.75	21	3.1	21.18	20	14.5888	2.70786	-1.18	2.12447	102.713	93.1021	NaN	NaN	NaN	NaN	NaN	0.906383	10.8	0.316653	1.45285
BCM	Gnai1	heterozygote	female	22.75	21.2333	3.1	21.2	21	14.631	3.08545	-0.2	2.12237	103.668	89.2435	NaN	NaN	NaN	NaN	NaN	0.860859	11	0.313851	1.43999
BCM	1700029F12Rik	homozygote	female	22.75	21.2333	3.1	20.64	20.88	14.2012	2.98704	0.24	2.10015	100.865	94.4278	NaN	NaN	NaN	NaN	NaN	0.93819	10.2	0.311189	1.42778
BCM	Qrfpr	homozygote	female	22.75	21.2333	3.1	20.2	20.26	14.1206	2.67285	0.06	2.08291	100.192	93.1019	NaN	NaN	NaN	NaN	NaN	0.928911	11	0.309323	1.41922
HMGU	Paox	homozygote	female	22.3611	20.75	3.339	21.3667	20.3111	13.0986	4.59625	-1.05556	2.15222	105.127	90.4947	NaN	NaN	0.121164	NaN	1.69271	0.863172	10.5556	0.309119	1.41829
BCM	Smarcb1	heterozygote	female	22.75	21.2333	3.1	20.75	20.95	14.1756	3.21095	0.2	2.10154	99.8272	98.4271	NaN	NaN	NaN	NaN	NaN	0.985701	11	0.308735	1.41652
MRC Harwell	Cib2	heterozygote	female	19.2	20	NaN	22.7	23.16	NaN	NaN	0.46	2.41412	115.541	109.984	5402.75	7207.28	NaN	NaN	NaN	0.951901	11	0.202721	1.39364
BCM	Gcdh	homozygote	female	22.75	21.2333	3.1	21.55	21.85	15.4764	2.9791	0.3	2.12329	101.585	96.8637	NaN	NaN	NaN	NaN	NaN	0.953456	11	0.30254	1.3881
ICS	Padi3	homozygote	female	21	21	3.145	21.6875	21.975	14.7394	2.22754	0.2875	2.19611	104.261	103.065	868.347	1340.73	0.243631	0.125476	3.20586	0.988473	11	0.201843	1.3876
BCM	Exoc6	homozygote	female	22.75	21.2333	3.1	16.6	17.15	12.1774	2.25548	0.55	1.94936	92.5336	91.5311	NaN	NaN	NaN	NaN	NaN	0.989111	10.5	0.301523	1.38343
BCM	Nlrp2	homozygote	female	22.75	21.2333	3.1	21.4	21.025	15.2685	2.84578	-0.375	2.11625	100.99	97.4627	NaN	NaN	NaN	NaN	NaN	0.964604	11	0.300741	1.37984
ICS	Casq1	homozygote	female	21	20.8	3.145	18.87	19.23	12.834	1.66966	0.36	2.08368	100.238	93.1048	1136.29	1719.84	0.19181	0.144571	2.52396	0.92837	11	0.198677	1.36583
BCM	Zfp148	heterozygote	female	22.75	21.1	3.1	21.1429	21.6286	14.7474	3.08172	0.485714	2.10316	100.535	96.2563	NaN	NaN	NaN	NaN	NaN	0.955221	10.1429	0.296638	1.36102
BCM	Pmepa1	homozygote	female	22.75	21.2333	3.1	17.14	16.5	11.8016	2.41275	-0.64	1.96333	94.7419	86.6807	NaN	NaN	NaN	NaN	NaN	0.915421	10.6	0.296628	1.36097
BCM	Marcks	homozygote	female	22.75	21.2333	3.1	21.12	21.2	15.2272	3.36864	0.08	2.1019	100.741	95.249	NaN	NaN	NaN	NaN	NaN	0.947135	10.4	0.296169	1.35887
ICS	Rrp1b	homozygote	female	21	21	3.145	21.2429	22.0286	16.1601	2.17001	0.785714	2.18119	104.331	99.5909	1516.69	2229.94	0.264626	0.14246	3.48213	0.954442	11	0.197076	1.35483
BCM	Csk	heterozygote	female	22.75	21.2333	3.1	20.0375	19.6375	14.0769	2.66365	-0.4	2.06204	98.7795	93.6262	NaN	NaN	NaN	NaN	NaN	0.949382	10.5	0.294132	1.34952
BCM	Abca13	homozygote	female	22.75	21.0667	3.1	22.2857	21.8571	14.7982	3.04793	-0.428571	2.13887	102.242	97.8893	NaN	NaN	NaN	NaN	NaN	0.956045	10	0.292423	1.34168
ICS	1500015O10Rik	homozygote	female	21	21	3.145	21.55	22.0125	15.1652	1.79788	0.4625	2.18558	103.666	102.908	999.045	1537.38	0.269107	0.130667	3.54109	0.992884	8	0.195121	1.34139
ICS	Rspo1	homozygote	female	21	21	3.145	20.425	20.6125	15.1682	2.21865	0.1875	2.14106	102.665	96.858	1143.49	1734.17	0.224524	0.130748	2.95444	0.942904	10	0.193849	1.33264
BCM	Bhmt	homozygote	female	22.75	21.2333	3.1	21.15	21	15.3182	2.3748	-0.15	2.09691	100.648	94.5032	NaN	NaN	NaN	NaN	NaN	0.939124	10	0.290141	1.33121
TCP	Rnf10	heterozygote	female	26.3643	21.3714	3.1	22.1843	22.7986	17.1264	3.93087	0.614286	1.87126	90.2769	82.695	2628.95	6117.47	0.164363	NaN	2.13185	0.915269	10.4286	0.193442	1.32984
BCM	Exoc6	heterozygote	female	22.75	21.2333	3.1	20.7333	20.75	14.7068	2.83591	0.0166667	2.08157	99.4523	95.449	NaN	NaN	NaN	NaN	NaN	0.959793	10.1667	0.289355	1.3276
BCM	Yju2	heterozygote	female	22.75	21	3.1	20.4429	20.6286	14.4067	2.64294	0.185714	2.07036	98.8807	95.062	NaN	NaN	NaN	NaN	NaN	0.961497	10	0.288285	1.3227
BCM	Lypla1	homozygote	female	22.75	21.2333	3.1	20.84	20.68	14.7096	2.88341	-0.16	2.08272	99.9928	93.7705	NaN	NaN	NaN	NaN	NaN	0.937445	10.8	0.286773	1.31576
ICS	Gatad2b	heterozygote	female	21	20.6	3.145	21.96	22.08	16.8725	2.40161	0.12	2.20754	106.007	99.3127	1832.02	2631.99	0.24019	0.12019	3.16059	0.934304	10.2	0.191353	1.31548
BCM	Gstm4	homozygote	female	22.75	21.1	3.1	18.8714	18.8286	NaN	NaN	-0.0428571	2.01287	96.5201	91.0494	NaN	NaN	NaN	NaN	NaN	0.940845	10	0.285685	1.31076
ICS	Dync1h1	heterozygote	female	21	21	3.145	19.475	19.9125	12.6141	1.90541	0.4375	2.10019	100.54	95.5955	1202.83	1814.39	0.234524	0.153401	3.08602	0.950139	11	0.190225	1.30773
ICS	Gemin4	heterozygote	female	21	21	3.145	20.325	21.0125	16.396	1.58757	0.6875	2.13228	101.219	100.111	1090.41	1660.05	0.275714	0.149524	3.62804	0.987602	10.625	0.189695	1.30408
TCP	Pstpip2	homozygote	female	27.4375	21.5417	3.1	21.29	21.3925	17.1608	2.99727	0.1025	1.72976	83.0783	77.768	1275.93	3007.37	NaN	NaN	NaN	0.934897	10.625	0.189693	1.30407
BCM	Tmtc3	heterozygote	female	22.75	21.2333	3.1	20.5143	20.2429	14.3007	2.80965	-0.271429	2.06798	99.596	91.9987	NaN	NaN	NaN	NaN	NaN	0.924157	10	0.28341	1.30033
BCM	Ddx39	heterozygote	female	22.75	21.2333	3.1	19.3167	19.35	13.5364	2.79245	0.0333333	2.02614	97.0067	92.1835	NaN	NaN	NaN	NaN	NaN	0.950586	10	0.283404	1.3003
ICS	Morc3	heterozygote	female	21	21	3.145	19.0714	19.0714	12.9382	1.60177	-2.53758e-16	2.07847	99.4286	94.8636	851.396	1335.92	0.244626	0.146857	3.21895	0.952535	9.28571	0.188712	1.29733
BCM	Cep19	homozygote	female	22.75	21.2333	3.1	23.1714	23.3286	15.4791	4.45318	0.157143	2.15647	103.174	98.3699	NaN	NaN	NaN	NaN	NaN	0.955304	10.5714	0.27908	1.28046
BCM	Pak6	homozygote	female	22.75	21.2333	3.1	19.9429	20.3714	14.0959	2.89805	0.428571	2.04126	96.7895	96.2253	NaN	NaN	NaN	NaN	NaN	0.995221	11	0.276652	1.26932
BCM	Has3	homozygote	female	22.75	21.0889	3.1	20.25	19.9	14.4875	2.72842	-0.35	2.05177	98.3542	92.9219	NaN	NaN	NaN	NaN	NaN	0.944998	10.1667	0.276437	1.26833
BCM	Dhx16	heterozygote	female	22.75	21.2333	3.1	21.6714	21.1429	15.1475	2.90707	-0.528571	2.10131	101.225	93.3988	NaN	NaN	NaN	NaN	NaN	0.92245	11	0.276326	1.26782
TCP	Rhbdl1	heterozygote	female	26.2937	21.6792	3.1	22.1975	21.9688	17.4521	3.85365	-0.22875	1.85157	89.5562	81.0076	1895.38	4275.61	0.176277	NaN	2.28638	0.904115	10.375	0.184011	1.26501
ICS	Rcan1	homozygote	female	21	20.5714	3.145	19.9286	20.1571	15.581	2.04598	0.228571	2.11431	101.558	95.0182	1466.52	2136.78	0.234048	0.124524	3.07976	0.935411	10.7143	0.183473	1.26131
BCM	Kyat1	homozygote	female	22.75	21.2333	3.1	19	19	13.5174	2.45771	0	2.00503	95.19	94.0956	NaN	NaN	NaN	NaN	NaN	0.988503	10	0.273358	1.25421
TCP	Lypd3	homozygote	female	26.5	21.2667	3.1	24.27	24.3	18.1119	5.97295	0.03	1.91136	92.2184	84.4425	NaN	NaN	0.190952	NaN	2.47673	0.91568	11	0.272899	1.2521
RBRC	Ap4e1	homozygote	female	23	19.9762	3.339	21.9286	21.9857	16.0486	3.22656	0.0571429	2.04045	99.3645	86.8752	786.619	788.333	0.161825	0.182789	2.26076	0.874436	10.8571	0.181889	1.25042
BCM	Pdx1	heterozygote	female	22.75	21.2333	3.1	20.5667	19.3	14.2781	2.74569	-1.26667	2.05295	99.206	90.1415	NaN	NaN	NaN	NaN	NaN	0.908827	11	0.266555	1.22299
BCM	Ccdc180	heterozygote	female	22.75	21.2333	3.1	21.1	21.1429	14.6782	2.93477	0.0428571	2.07119	99.4672	93.1516	NaN	NaN	NaN	NaN	NaN	0.936846	10.2857	0.266161	1.22119
BCM	Gpr39	homozygote	female	22.75	21.0714	3.1	21.6571	21.6286	14.8605	3.19548	-0.0285714	2.09033	100.815	92.4846	NaN	NaN	NaN	NaN	NaN	0.917123	10	0.265844	1.21973
BCM	Dsg2	homozygote	female	22.75	21.2333	3.1	20.6286	20.3571	14.4559	2.89185	-0.271429	2.05205	98.515	92.4093	NaN	NaN	NaN	NaN	NaN	0.93796	10.5714	0.263492	1.20894
TCP	Gng13	homozygote	female	26.3167	21.3889	3.1	20.6733	20.0667	15.1769	4.19793	-0.606667	1.83386	89.0146	79.1114	4773.16	10507.5	0.128059	NaN	1.66098	0.890614	10.6667	0.175495	1.20646
BCM	Gnai1	homozygote	female	22.75	21.2333	3.1	20.2333	20.2167	14.0084	2.6046	-0.0166667	2.03537	98.1003	90.2816	NaN	NaN	NaN	NaN	NaN	0.920405	10.5	0.260616	1.19574
BCM	Erc1	heterozygote	female	22.75	21.2333	3.1	20.85	21.2667	14.3972	2.881	0.416667	2.05652	98.1343	94.7314	NaN	NaN	NaN	NaN	NaN	0.965148	10.6667	0.260225	1.19395
BCM	Rps19bp1	heterozygote	female	22.75	21.0667	3.1	21.4	20.8714	14.8898	2.90397	-0.528571	2.07567	99.7557	93.0921	NaN	NaN	NaN	NaN	NaN	0.933149	10	0.260163	1.19367
RBRC	Prkab1	homozygote	female	23	20.0476	3.339	21.7429	21.9857	15.8383	3.30169	0.242857	2.02153	97.9936	87.6718	556.769	558.367	0.166111	0.189524	2.32063	0.896344	11.2857	0.172352	1.18486
BCM	Scarb1	homozygote	female	22.75	21.2333	3.1	22.04	22.28	15.3719	2.85768	0.24	2.0947	100.756	93.6387	NaN	NaN	NaN	NaN	NaN	0.931102	10.4	0.256834	1.17839
BCM	G3bp1	homozygote	female	22.75	21.2333	3.1	20.7	20.4	15.0288	2.45753	-0.3	2.04756	98.739	90.6412	NaN	NaN	NaN	NaN	NaN	0.917987	11	0.256509	1.1769
BCM	Akap7	homozygote	female	22.75	21.2333	3.1	20.7286	20.8143	14.945	2.79365	0.0857143	2.04712	98.2967	92.1206	NaN	NaN	NaN	NaN	NaN	0.937676	10.4286	0.255063	1.17027
BCM	Trim59	heterozygote	female	22.75	21.2333	3.1	22.3429	21.9857	NaN	NaN	-0.357143	2.10158	101.503	92.4638	NaN	NaN	NaN	NaN	NaN	0.91222	11	0.253138	1.16144
TCP	Ptpmt1	heterozygote	female	26.7	21.1292	3.1	21.9488	22.4638	17.0924	3.69701	0.515	1.80316	86.8845	80.0672	2362.43	5100.15	0.164922	NaN	2.1391	0.921615	11	0.167048	1.14839
BCM	Wbp1l	homozygote	female	22.75	21.2333	3.1	21.5833	21.5667	15.5265	2.62872	-0.0166667	2.07216	100.274	90.4862	NaN	NaN	NaN	NaN	NaN	0.904149	10.5	0.250254	1.1482
ICS	Cstb	homozygote	female	21	21	3.145	18.15	18.2875	14.7388	1.41157	0.1375	2.01936	96.1705	93.6989	824.165	1299.62	0.212976	0.0964286	2.80249	0.973963	9.875	0.166702	1.14602
BCM	Ift172	heterozygote	female	22.75	21.2333	3.1	22.1429	21.8857	15.3961	3.30477	-0.257143	2.08861	100.912	91.7685	NaN	NaN	NaN	NaN	NaN	0.909791	10	0.24715	1.13396
BCM	Ces1a	homozygote	female	22.75	21.2333	3.1	21.25	21.5167	13.9921	4.64647	0.266667	2.05554	98.0389	94.8586	NaN	NaN	NaN	NaN	NaN	0.968302	10	0.245269	1.12533
ICS	Nox1	homozygote	female	21	21	3.145	21.48	24.06	16.3349	2.6491	2.58	2.14835	102.123	100.363	930.382	1433.43	0.276571	0.133214	3.63931	0.982633	10.2	0.161577	1.11078
BCM	Nadk	heterozygote	female	22.75	21.2333	3.1	20.7714	20.6429	14.5083	2.89311	-0.128571	2.03455	98.882	87.3191	NaN	NaN	NaN	NaN	NaN	0.883958	10	0.240999	1.10574
BCM	Hibadh	homozygote	female	22.75	21.2333	3.1	20.2	19.96	14.303	2.46472	-0.24	2.01375	96.648	90.7839	NaN	NaN	NaN	NaN	NaN	0.939538	10.8	0.240157	1.10187
TCP	Nxn	heterozygote	female	27.1786	21.6333	3.1	20.3229	20.5	15.3872	3.63369	0.177143	1.70039	82.3678	73.9527	2451.45	5443.41	0.136948	NaN	1.77627	0.899937	11	0.159909	1.09932
RBRC	Adcyap1r1	heterozygote	female	23	19.9	3.339	23.5714	23.7429	16.9435	3.75125	0.171429	2.0819	100.842	90.5666	549.619	551.422	0.151667	0.186463	2.11884	0.896756	11.4286	0.159759	1.09829
BCM	Bbox1	homozygote	female	22.75	21	3.1	21.5167	20.8167	NaN	NaN	-0.7	2.058	99.3092	90.8657	NaN	NaN	NaN	NaN	NaN	0.914853	10	0.238423	1.09392
TCP	Gtpbp2	heterozygote	female	25.9312	21.3583	3.1	21.9638	22.035	16.3984	4.53926	0.07125	1.85257	89.9906	79.6764	2379.03	5555.49	0.113425	NaN	1.47117	0.885457	10.875	0.157918	1.08563
BCM	Cfap97d1	homozygote	female	22.75	21	3.1	21.3125	21.075	14.8016	3.35644	-0.2375	2.04858	98.5389	91.5748	NaN	NaN	NaN	NaN	NaN	0.928326	10.75	0.236134	1.08342
HMGU	Gria1	homozygote	female	21.95	20.6667	3.339	19.8	19.4	11.5004	6.08804	-0.4	2.05411	98.8651	91.6071	NaN	NaN	0.166667	NaN	2.3284	0.927944	10.75	0.235339	1.07977
BCM	Rnf10	homozygote	female	22.75	21.2333	3.1	19.5	19.05	13.0013	2.35147	-0.45	1.98435	96.0219	86.6619	NaN	NaN	NaN	NaN	NaN	0.901866	10	0.23521	1.07918
BCM	Nr1d1	heterozygote	female	22.75	21	3.1	21.62	21.56	15.7004	3.1749	-0.06	2.05675	98.7186	92.6983	NaN	NaN	NaN	NaN	NaN	0.940531	10	0.233555	1.07159
BCM	Ap1ar	homozygote	female	22.75	21.2333	3.1	19.1	20.2	13.3035	2.75572	1.1	1.96775	93.3302	92.6656	NaN	NaN	NaN	NaN	NaN	0.992878	11	0.232581	1.06712
TCP	Ubox5	homozygote	female	26.65	21.9542	3.1	22.6062	21.8475	17.3204	4.72905	-0.75875	1.81598	88.7726	76.1088	1988.25	4525.86	0.119886	NaN	1.55497	0.858169	10	0.155005	1.0656
BCM	Slc35d1	heterozygote	female	22.75	21.2333	3.1	20	20.16	13.8961	2.97921	0.16	1.99842	95.3498	92.0973	NaN	NaN	NaN	NaN	NaN	0.965839	10.8	0.231814	1.0636
BCM	Tek	heterozygote	female	22.75	21.2333	3.1	20.2429	20.5143	14.2801	2.60762	0.271429	2.00557	96.7458	88.6687	NaN	NaN	NaN	NaN	NaN	0.91712	10.5714	0.230484	1.0575
BCM	Esyt2	homozygote	female	22.75	21.2333	3.1	21.4571	21.1429	15.0903	2.67612	-0.314286	2.04615	99.3648	88.1052	NaN	NaN	NaN	NaN	NaN	0.888652	10.2857	0.228645	1.04906
BCM	Fgf12	homozygote	female	22.75	21.2333	3.1	20.18	19.82	14.4792	2.59807	-0.36	1.99901	95.6994	90.9797	NaN	NaN	NaN	NaN	NaN	0.950773	11	0.226119	1.03747
TCP	Cln6	homozygote	female	27.2937	21.725	3.1	20.8925	20.6387	16.9224	3.1496	-0.25375	1.70599	82.4462	74.8836	2403.54	5463.45	0.144771	NaN	1.87774	0.908489	10.625	0.15069	1.03594
BCM	Gstcd	homozygote	female	22.75	21.2333	3.1	22.8	21.9429	15.4373	3.27015	-0.857143	2.0893	101.709	89.0774	NaN	NaN	NaN	NaN	NaN	0.87564	10.4286	0.224889	1.03183
BCM	Gyg	heterozygote	female	22.75	21.1429	3.1	21.6286	21.3143	15.0976	3.19906	-0.314286	2.04817	98.7681	90.6679	NaN	NaN	NaN	NaN	NaN	0.919152	10	0.224676	1.03085
HMGU	Lss	heterozygote	female	24.9	20.75	3.339	26.05	25.25	NaN	NaN	-0.8	2.04343	98.8988	89.1786	NaN	NaN	0.15	NaN	2.09556	0.901036	10	0.224478	1.02994
BCM	Ash2l	heterozygote	female	22.75	21.2333	3.1	19.65	19.675	14.1876	2.37271	0.025	1.97817	96.5558	83.4252	NaN	NaN	NaN	NaN	NaN	0.866701	10	0.223795	1.02681
BCM	Fgf3	heterozygote	female	22.75	21.2333	3.1	20.0375	20.05	14.0268	2.60899	0.0125	1.99087	96.1022	87.7861	NaN	NaN	NaN	NaN	NaN	0.913382	10	0.222961	1.02298
TCP	Skida1	heterozygote	female	26.9625	21.4042	3.1	22.5463	22.4325	16.9525	4.16089	-0.11375	1.78538	86.6066	77.2152	2016.46	4671.97	0.133781	NaN	1.73519	0.891222	10.5	0.147525	1.01418
TCP	Skida1	homozygote	female	27.45	20.9	3.1	18.88	18.38	13.9263	4.11248	-0.5	1.59019	77.9058	66.0381	1369.78	3014.57	NaN	NaN	NaN	0.847666	11	0.147175	1.01178
HMGU	Ywhab	homozygote	female	21.5833	20.6667	3.339	22.4667	21.2	NaN	NaN	-1.26667	2.15946	105.368	91.2011	NaN	NaN	0.101587	NaN	1.41921	0.86504	10.1667	0.22042	1.01132
HMGU	Fut1	homozygote	female	21.8833	20.6667	3.339	21.7333	21.5333	13.5784	5.97774	-0.2	2.11121	102.333	91.5873	NaN	NaN	0.130159	NaN	1.81837	0.894989	10.6667	0.219972	1.00927
BCM	Adsl	heterozygote	female	22.75	21.5714	3.1	20.3429	20.1286	14.2841	2.72509	-0.214286	1.99819	96.0895	89.4121	NaN	NaN	NaN	NaN	NaN	0.929383	10.5714	0.219609	1.0076
BCM	1700086L19Rik	homozygote	female	22.75	21.2333	3.1	17.9	18.04	12.8316	2.19001	0.14	1.9118	92.4374	83.7576	NaN	NaN	NaN	NaN	NaN	0.913949	10.4	0.218554	1.00276
ICS	Scaper	homozygote	female	21	21	3.145	19.7	20.175	15.0399	2.31812	0.475	2.06779	99.2565	93.168	1506.35	2235.02	0.242619	0.128869	3.19255	0.938198	11.25	0.145241	0.998482
BCM	Tatdn2	heterozygote	female	22.75	21.2333	3.1	19.7	19.675	14.0397	2.74812	-0.025	1.97353	95.2963	86.9089	NaN	NaN	NaN	NaN	NaN	0.912534	11	0.217402	0.997471
BCM	Kyat1	heterozygote	female	22.75	21.2333	3.1	19.9333	20.5	13.9521	2.75247	0.566667	1.98103	94.5779	91.0913	NaN	NaN	NaN	NaN	NaN	0.964966	10.8333	0.21676	0.994528
BCM	G3bp1	heterozygote	female	22.75	21.2333	3.1	21.1167	21.1167	14.9827	2.81747	-5.9211e-16	2.02208	96.8626	91.82	NaN	NaN	NaN	NaN	NaN	0.948127	11	0.21647	0.993196
BCM	Bbox1	heterozygote	female	22.75	21	3.1	21.45	21	NaN	NaN	-0.45	2.03326	97.5979	91.6166	NaN	NaN	NaN	NaN	NaN	0.937305	10	0.216009	0.991082
BCM	Ccdc181	homozygote	female	22.75	21.2333	3.1	20.6667	20.5667	16.3163	2.8625	-0.1	2.00477	96.6463	88.8512	NaN	NaN	NaN	NaN	NaN	0.920476	10	0.214883	0.985917
ICS	Taf2	heterozygote	female	21	21	3.145	20.5	21.1625	16.7747	1.56066	0.6625	2.09438	99.9659	96.3864	1337.1	1987.25	0.267202	0.158175	3.51603	0.962928	10.75	0.142006	0.976238
BCM	Prdm14	heterozygote	female	22.75	21.2333	3.1	26.2	24.2	16.7972	3.74286	-2	2.19455	107.556	90.9874	NaN	NaN	NaN	NaN	NaN	0.845952	11	0.211378	0.969834
ICS	Prrt2	homozygote	female	21	21	3.145	19.9	20.825	16.0703	1.59227	0.925	2.07042	98.5795	96.1477	1541.68	2246.11	0.267857	0.133095	3.52465	0.975099	10	0.139787	0.960983
TCP	Slc52a2	heterozygote	female	27.3562	21.7708	3.1	21.6762	21.6375	16.6204	4.43328	-0.03875	1.71126	82.9593	74.1944	1923.62	4307.75	0.144034	NaN	1.86818	0.89424	10.5	0.138941	0.955169
TCP	Cbx4	heterozygote	female	26.0875	21.3125	3.1	20.8712	21.1788	16.1847	3.95728	0.3075	1.7944	86.9867	77.8099	3496.36	7431.82	0.131082	NaN	1.70019	0.894996	10.75	0.138317	0.950881
BCM	Thada	homozygote	female	22.75	21.8571	3.1	20.8	21	14.9803	2.8338	0.2	2.00139	93.9218	97.8272	NaN	NaN	NaN	NaN	NaN	1.04455	10.5714	0.206839	0.949006
HMGU	Pla2g2e	homozygote	female	24.25	20.75	3.339	22.5	21.95	NaN	NaN	-0.55	1.94927	94.6131	84.1012	NaN	NaN	0.147619	NaN	2.06229	0.888538	11	0.206256	0.946332
HMGU	Syde1	heterozygote	female	21.95	20.6667	3.339	21.5667	21.4333	13.1463	6.12909	-0.133333	2.08562	100.892	91.1958	NaN	NaN	0.128571	NaN	1.79619	0.903946	10.5	0.205138	0.941205
BCM	Btbd16	homozygote	female	22.75	21.2333	3.1	21.1	21.0167	14.663	2.87415	-0.0833333	2.00998	96.8053	89.4086	NaN	NaN	NaN	NaN	NaN	0.925474	10	0.204948	0.940334
TCP	Aktip	homozygote	female	26.0875	21.4958	3.1	20.365	21.0225	15.6155	3.51994	0.6575	1.75684	84.0955	79.994	2362.93	5656.79	NaN	NaN	NaN	0.951605	10.625	0.136142	0.935928
ICS	Sh3tc1	homozygote	female	21	21	3.145	19.8125	20.1375	15.9465	1.47979	0.325	2.05802	98.858	92.4773	1111.31	1675.61	0.219405	0.112976	2.88708	0.936238	10	0.135764	0.93333
BCM	Flywch1	heterozygote	female	22.75	21.2333	3.1	20.66	20.66	14.0762	2.81715	0	1.99272	95.5571	90.1285	NaN	NaN	NaN	NaN	NaN	0.939926	10.8	0.203066	0.931698
BCM	Mmp15	homozygote	female	22.75	21.2333	3.1	20.4375	20.2875	14.5661	2.65109	-0.15	1.98287	95.3926	88.5842	NaN	NaN	NaN	NaN	NaN	0.928089	10.5	0.200981	0.92213
ICS	Cdc27	heterozygote	female	21	21	3.145	22.4	23.0625	16.6767	3.27822	0.6625	2.16005	102.534	101.426	1161.06	1760.48	0.272679	0.140952	3.58809	0.990087	11	0.133744	0.919446
TCP	Ampd1	heterozygote	female	26.2437	21.8167	3.1	24.8487	24.6575	17.8461	5.8837	-0.19125	1.91491	92.9527	82.5924	2083.21	4787.2	0.113636	NaN	1.47391	0.891018	10.75	0.133594	0.91841
HMGU	Oscp1	homozygote	female	23.6	20.75	3.339	21.4	21.3	NaN	NaN	-0.1	1.95265	94.3452	85.7857	NaN	NaN	0.142857	NaN	1.99577	0.909274	11	0.199993	0.9176
TCP	Gpc2	homozygote	female	26.7	21.5875	3.1	20.1088	20.5813	15.6853	3.28238	0.4725	1.68271	81.3673	73.6972	1518.75	3561.01	0.139088	NaN	1.80403	0.906145	10.5	0.13323	0.915907
BCM	Ldlrad1	homozygote	female	22.75	21.2333	3.1	21.4	20.8	14.908	2.65236	-0.6	2.01506	96.2265	92.569	NaN	NaN	NaN	NaN	NaN	0.962192	10.6667	0.199549	0.915562
BCM	Mboat4	homozygote	female	22.75	21.2333	3.1	21.0571	20.9714	14.7398	2.72498	-0.0857143	2.00296	96.8067	87.8867	NaN	NaN	NaN	NaN	NaN	0.909735	10.7143	0.199425	0.914993
BCM	Trim31	homozygote	female	22.75	21.2333	3.1	21.1429	20.2571	14.0797	4.30038	-0.885714	2.0048	96.7334	88.5456	NaN	NaN	NaN	NaN	NaN	0.916082	11	0.198272	0.909703
BCM	Dnase1l2	homozygote	female	22.75	21.4694	3.1	19.2917	19.3083	14.7959	2.94998	0.0166667	1.93724	93.0342	87.1287	NaN	NaN	NaN	NaN	NaN	0.936716	10.4167	0.195383	0.896448
BCM	Tmem86b	homozygote	female	22.75	21.2333	3.1	19.9857	20.5714	14.1957	2.59806	0.585714	1.96126	93.7331	89.828	NaN	NaN	NaN	NaN	NaN	0.960491	10.7143	0.195154	0.895396
RBRC	Dbn1	heterozygote	female	23	19.9714	3.339	23.6714	23.6286	17.1392	3.84796	-0.0428571	2.05325	99.1437	90.428	462.238	463.667	0.161565	0.207143	2.25712	0.912667	11.4286	0.12787	0.879059
HMGU	Mphosph9	homozygote	female	22.2	20.6667	3.339	23.1125	22.4	14.0864	6.75799	-0.7125	2.10574	101.925	91.8611	NaN	NaN	0.147619	NaN	2.06229	0.89747	10	0.18974	0.870556
TCP	Ywhaz	homozygote	female	26.15	21.2667	3.1	21.37	20.68	16.5523	4.0603	-0.69	1.78185	85.7551	79.4864	2400.07	5567.71	NaN	NaN	NaN	0.926901	11	0.126183	0.867462
BCM	Paqr6	homozygote	female	22.75	21.3333	3.1	20.3333	19.9667	14.6346	2.73215	-0.366667	1.96102	93.6837	89.9516	NaN	NaN	NaN	NaN	NaN	0.96043	11	0.182769	0.838569
BCM	Ankrd7	homozygote	female	22.75	21.125	3.1	20.45	20.125	14.8791	2.68658	-0.325	1.96477	93.8292	90.2452	NaN	NaN	NaN	NaN	NaN	0.961766	11	0.182451	0.837111
BCM	Nr1d1	homozygote	female	22.75	22.3333	3.1	18.85	18.9833	13.7296	2.14412	0.133333	1.90766	91.4032	86.5468	NaN	NaN	NaN	NaN	NaN	0.948121	10.5	0.181225	0.831486
TCP	Nhs	homozygote	female	26.3571	21.8952	3.1	23.27	22.9071	18.4452	3.96486	-0.362857	1.81951	88.2866	78.6044	1394.73	3425.6	NaN	NaN	NaN	0.891533	10.4286	0.120854	0.830827
BCM	Pla2g4e	homozygote	female	22.75	21.2333	3.1	20.6286	20.8286	14.5549	2.85645	0.2	1.96932	93.5745	92.1362	NaN	NaN	NaN	NaN	NaN	0.985055	10.8571	0.180765	0.829376
BCM	Zfp831	homozygote	female	22.75	21.2333	3.1	20.8429	21.1	14.7467	2.94701	0.257143	1.97536	94.2969	90.8655	NaN	NaN	NaN	NaN	NaN	0.965899	10.5714	0.179311	0.822706
HMGU	Cyp4b1	homozygote	female	22.4833	20.75	3.339	21.1833	20.6167	NaN	NaN	-0.566667	2.00685	97.8016	85.1825	NaN	NaN	0.131746	NaN	1.84054	0.872161	11	0.17919	0.822149
TCP	Ifi44	homozygote	female	26.5571	21.4762	3.1	21.9129	21.9986	16.8166	3.6013	0.0857143	1.75738	85.1219	76.4547	1754.21	4290.33	0.149344	NaN	1.93706	0.897964	10.5714	0.119581	0.822078
HMGU	Ubac2	homozygote	female	21.77	20.6667	3.339	22.22	21.96	NaN	NaN	-0.26	2.0956	101.21	92.219	NaN	NaN	0.152857	NaN	2.13547	0.912012	10.5	0.178985	0.821209
BCM	Spo11	homozygote	female	22.75	21.2333	3.1	22.1	21.4	15.0934	3.07377	-0.7	2.01749	98.3008	85.7031	NaN	NaN	NaN	NaN	NaN	0.872282	10.75	0.177528	0.814526
TCP	Plekhm1	homozygote	female	27.6143	21.5286	3.1	19.9029	19.9186	15.48	2.77504	0.0157143	1.59987	77.0923	71.0275	1823.18	4206.59	0.118211	NaN	1.53324	0.920594	10.7143	0.117363	0.806828
ICS	Klf12	heterozygote	female	21	21	3.145	20.425	20.05	16.3048	1.97542	-0.375	2.06299	99.1307	92.5795	1340.54	1965.23	0.223155	0.122143	2.93642	0.933648	11	0.1138	0.782337
BCM	Gdpd5	heterozygote	female	22.75	21.2333	3.1	20.22	20.26	14.1798	2.62454	0.04	1.94451	94.2449	84.3843	NaN	NaN	NaN	NaN	NaN	0.895002	10.6	0.170218	0.780987
BCM	Rnft2	homozygote	female	22.75	21.2333	3.1	18.4167	18.6833	12.9019	2.7089	0.266667	1.88018	89.6289	86.9324	NaN	NaN	NaN	NaN	NaN	0.970779	11	0.168889	0.774888
BCM	Ndufs7	heterozygote	female	22.75	21.2333	3.1	20.3429	20.0286	14.1099	2.73485	-0.314286	1.9473	94.2647	84.9166	NaN	NaN	NaN	NaN	NaN	0.901012	10	0.168717	0.7741
TCP	Hook3	homozygote	female	26.2143	21.8429	3.1	19.29	19.1314	15.6429	2.6497	-0.158571	1.67969	80.8963	74.7224	2496.63	5551.51	NaN	NaN	NaN	0.923681	10.8571	0.111735	0.76814
TCP	Dnase1l2	homozygote	female	26.8438	21.8167	3.1	17.6137	17.8863	13.6645	2.53809	0.2725	1.55141	75.0691	67.7651	1596.27	3612.25	0.126299	NaN	1.63814	0.902078	10.25	0.111223	0.764616
KMPC	Krt26	homozygote	female	22	20	NaN	23.92	22.9512	NaN	NaN	-0.96875	2.21097	106.995	96.5343	6126.98	11685.5	0.137262	0.104524	NaN	0.904041	11	0.109411	0.752164
TCP	Atp6v1b2	heterozygote	female	27.1929	22.3143	3.1	22.0343	21.5614	17.1412	3.97804	-0.472857	1.70766	82.9386	73.4896	1960.54	4366.14	0.133464	NaN	1.73108	0.885596	10.7143	0.109056	0.74972
BCM	1700012B09Rik	homozygote	female	22.75	21.2333	3.1	20.4	21.075	14.5611	2.94329	0.675	1.94168	92.0162	91.7139	NaN	NaN	NaN	NaN	NaN	0.997732	10.5	0.1611	0.739149
TCP	Idh1	homozygote	female	26.9688	21.3125	3.1	18.9563	19.1925	14.4428	3.15925	0.23625	1.59998	77.342	70.1616	2099.86	4508.63	0.153041	NaN	1.985	0.909715	10.375	0.107307	0.737697
BCM	Oasl1	homozygote	female	22.75	21.2333	3.1	22.1667	21.9	15.9186	2.81915	-0.266667	2.0029	96.0344	90.6267	NaN	NaN	NaN	NaN	NaN	0.944147	11	0.160613	0.736917
BCM	Spo11	heterozygote	female	22.75	21.2333	3.1	21.1333	20.1	14.574	2.76439	-1.03333	1.9664	95.9103	83.1819	NaN	NaN	NaN	NaN	NaN	0.867113	10.6667	0.160211	0.735074
TCP	Wee1	heterozygote	female	26.6438	21.175	3.1	20.8225	21.2225	16.1653	3.3923	0.4	1.69462	81.4986	75.8029	1804.8	4323.41	0.151379	NaN	1.96345	0.931009	10.125	0.106165	0.729845
BCM	Ces1a	heterozygote	female	22.75	21.2333	3.1	20.1	21.5	12.8025	4.90113	1.4	1.92845	91.7042	89.9676	NaN	NaN	NaN	NaN	NaN	0.981063	10	0.158354	0.726551
HMGU	Plekhh1	homozygote	female	22.55	20.6667	3.339	21.84	20.92	12.9514	6.91243	-0.92	2.00103	97.0635	86.5556	NaN	NaN	0.137143	NaN	1.91594	0.891571	10.6	0.155364	0.712835
BCM	Kctd7	homozygote	female	22.75	21.2333	3.1	20.4	20.4143	13.3656	4.48959	0.0142857	1.93507	92.3011	89.2711	NaN	NaN	NaN	NaN	NaN	0.967048	10.7143	0.154494	0.70884
BCM	Podn	homozygote	female	22.75	21.1944	3.1	21.7833	21.6833	15.5117	2.77782	-0.1	1.98328	95.58	88.0066	NaN	NaN	NaN	NaN	NaN	0.919475	10.3333	0.154387	0.708351
BCM	Tbccd1	homozygote	female	22.75	21.2333	3.1	20.9143	20.7	14.4958	2.71401	-0.214286	1.95129	95.074	82.897	NaN	NaN	NaN	NaN	NaN	0.873288	10.2857	0.152755	0.700862
TCP	Cox19	heterozygote	female	26.6714	21.7381	3.1	23.04	22.9171	17.5745	4.31393	-0.122857	1.78603	86.7295	76.9167	2306.74	5416.85	0.136742	NaN	1.7736	0.888223	11	0.101622	0.698616
BCM	Pptc7	homozygote	female	22.75	21.2333	3.1	20.4	21.6	14.7436	2.96727	1.2	1.93283	91.188	92.7547	NaN	NaN	NaN	NaN	NaN	1.01718	11	0.152259	0.698588
HMGU	Thg1l	heterozygote	female	22.35	20.6667	3.339	22.7125	22.15	13.9805	6.56588	-0.5625	2.04216	99.5337	86.6409	NaN	NaN	0.11131	NaN	1.55504	0.8708	10.125	0.151225	0.693841
TCP	Plod1	homozygote	female	27.0214	21.3714	3.1	20.0929	20.2843	15.7265	3.40923	0.191429	1.62916	78.1502	73.5891	1626.97	3804.79	0.137273	NaN	1.78048	0.941816	10.4286	0.10083	0.69317
TCP	Crispld2	heterozygote	female	26.4	21.2667	3.1	21.4575	21.44	16.0242	4.5342	-0.0175	1.72997	83.609	75.9214	1841.83	4341.09	0.198755	NaN	2.57794	0.90808	10.5	0.0988676	0.67968
BCM	Anapc13	heterozygote	female	22.75	21.1	3.1	20.5143	20.5143	14.126	2.94472	0	1.93241	91.9212	90.0503	NaN	NaN	NaN	NaN	NaN	0.976723	10	0.147843	0.678326
BCM	Ly6e	heterozygote	female	22.75	21.2333	3.1	22.2571	22.8286	NaN	NaN	0.571429	1.99282	95.8679	89.0418	NaN	NaN	NaN	NaN	NaN	0.929646	11	0.147373	0.676171
BCM	Fmnl3	heterozygote	female	22.75	21.2333	3.1	21.8	21.6	15.0923	2.60855	-0.2	1.97633	96.4519	83.3981	NaN	NaN	NaN	NaN	NaN	0.86466	10	0.146856	0.673795
BCM	Eif2s2	heterozygote	female	22.75	21.0714	3.1	19.7857	19.4429	13.8146	2.62672	-0.342857	1.90584	91.3836	86.2238	NaN	NaN	NaN	NaN	NaN	0.941516	10	0.146721	0.673179
TCP	Casq2	heterozygote	female	27.6	21.581	3.1	24.0214	24.0943	17.6776	5.1348	0.0728571	1.74303	84.2112	76.598	1576.18	3898.42	0.160833	NaN	2.08607	0.909997	11	0.0976981	0.671639
TCP	Fus	heterozygote	female	26.2875	21.3583	3.1	22.8813	23.2875	17.6468	4.85726	0.40625	1.79754	86.4868	80.2692	2181.87	4813.77	0.140363	NaN	1.82056	0.928168	10.75	0.0976375	0.671223
BCM	Arhgap23	homozygote	female	22.75	21.2333	3.1	19.4143	19.6714	NaN	NaN	0.257143	1.89177	90.6964	85.6326	NaN	NaN	NaN	NaN	NaN	0.945438	10	0.145627	0.66816
HMGU	Usp12	homozygote	female	24.4	20.75	3.339	19.9714	19.5571	NaN	NaN	-0.414286	1.78854	86.8571	77.0051	NaN	NaN	0.12585	NaN	1.75818	0.886297	11	0.144948	0.665042
HMGU	Ppp4r3b	homozygote	female	21.675	20.7083	3.339	21.7375	21.6625	12.9042	6.76525	-0.075	2.05164	99.2108	89.8413	NaN	NaN	0.150595	NaN	2.10387	0.904421	10.625	0.144854	0.664612
RBRC	Atp6v0a4	heterozygote	female	23	20.0476	3.339	23.0714	23.0714	16.5194	3.5793	5.07546e-16	1.99961	96.3733	88.7078	699.381	699.476	0.181048	0.216825	2.5293	0.921505	11	0.0961711	0.661142
TCP	Rsad1	homozygote	female	26.59	21.9267	3.1	21.264	20.502	16.7471	3.97958	-0.762	1.702	82.8298	72.6534	1807.29	3906.13	0.126909	NaN	1.64606	0.875798	10.4	0.0957001	0.657904
TCP	Cox4i1	heterozygote	female	26.2625	21.4042	3.1	20.1675	20.2037	15.5729	3.70108	0.03625	1.69286	81.9677	73.7512	2426.3	5266.04	0.128296	NaN	1.66405	0.900946	10.25	0.0956984	0.657893
ICS	Parp1	homozygote	female	21	21	3.145	19.875	20.35	13.2187	1.4025	0.475	2.0226	97.2841	90.4318	1278.7	1928.66	0.221548	0.156667	2.91527	0.928825	11.75	0.0956878	0.657819
TCP	Vps13d	heterozygote	female	26.3714	21.7905	3.1	22.3043	22.6014	16.6401	4.23758	0.297143	1.76096	85.1185	77.24	1775.66	4162.36	0.159675	NaN	2.07105	0.907968	10.4286	0.0955664	0.656985
HMGU	Pdgfc	heterozygote	female	22.1	20.6667	3.339	22.1	21.7	13.9545	5.91433	-0.4	2.03035	98.546	87.6079	NaN	NaN	0.126667	NaN	1.76958	0.889043	10.3	0.142322	0.652995
HMGU	Zfp445	heterozygote	female	23.6	20.75	3.339	23.625	22.85	NaN	NaN	-0.775	1.97214	95.4613	86.0208	NaN	NaN	0.133333	NaN	1.86272	0.901356	11	0.141763	0.650428
HMGU	Ddx43	homozygote	female	21.75	20.6667	3.339	22.5	22.3	13.0014	7.57846	-0.2	2.06918	99.8889	91.2143	NaN	NaN	0.146429	NaN	2.04566	0.912492	10.25	0.141299	0.648303
BCM	Cubn	heterozygote	female	22.75	21.2333	3.1	20.8	20.75	14.4838	2.91942	-0.05	1.93494	92.423	88.8099	NaN	NaN	NaN	NaN	NaN	0.959849	10.8333	0.140396	0.644157
TCP	Atp6v1d	heterozygote	female	26.5125	21.45	3.1	21.24	21.2987	16.6642	3.35059	0.05875	1.70709	82.4256	75.1943	1854.99	4339.06	0.0672727	NaN	0.872554	0.913415	10.375	0.0926009	0.636598
TCP	Gpc2	heterozygote	female	26.7125	21.5875	3.1	21.9675	22.0987	16.6274	3.96457	0.13125	1.7165	83.2832	74.1715	1580.42	3766.56	0.144716	NaN	1.87702	0.891724	10.25	0.0919154	0.631885
HMGU	Ndufs1	heterozygote	female	24.7	20.75	3.339	23.3	22.8	14.1386	5.9459	-0.5	1.87533	90.3254	83.4008	NaN	NaN	0.133333	NaN	1.86272	0.923359	11	0.137645	0.631536
BCM	Mogs	heterozygote	female	22.75	21.9633	3.1	20.51	20.36	14.3432	2.60177	-0.15	1.92173	93.0535	83.7073	NaN	NaN	NaN	NaN	NaN	0.90121	10.4	0.13731	0.629998
KMPC	Prkab1	homozygote	female	22	20	NaN	21.3012	21.5975	17.0921	3.49998	0.29625	2.04887	97.9583	93.7052	3202.67	7083.6	0.204354	0.174558	NaN	0.957544	10.75	0.0912285	0.627164
BCM	Foxj3	heterozygote	female	22.75	21.2333	3.1	20.9286	20.4857	15.0416	2.41489	-0.442857	1.935	93.7845	83.971	NaN	NaN	NaN	NaN	NaN	0.897583	10.1429	0.135964	0.623821
ICS	Ptpra	homozygote	female	21	21	3.145	21.3143	21.8	17.0977	2.01228	0.485714	2.07005	99	94.5714	868.831	1353.7	0.240136	0.118299	3.15987	0.954338	11	0.0905817	0.622717
TCP	Acvr2a	heterozygote	female	27.9062	21.3125	3.1	23.2013	23.6812	17.6497	4.56937	0.48	1.68499	81.4377	73.9389	1929.29	4352.83	0.149318	NaN	1.93672	0.907714	10.375	0.0900544	0.619092
KMPC	Hdac11	homozygote	female	22	20	NaN	25.3143	24.3786	20.0225	4.40275	-0.935714	2.22545	107.851	96.6149	4657.4	9143.67	0.165873	0.118231	NaN	0.897565	11.4286	0.0899505	0.618377
TCP	Lmbrd1	heterozygote	female	27.5375	21.725	3.1	19.9712	20.1575	15.4809	3.28866	0.18625	1.57878	75.9086	70.6888	1798.38	4022.22	0.153393	NaN	1.98957	0.930959	10.75	0.0897241	0.616821
BCM	Bicdl1	homozygote	female	22.75	21.2333	3.1	19.3143	19.3143	13.4703	2.49939	1.01506e-15	1.87543	90.2464	83.7039	NaN	NaN	NaN	NaN	NaN	0.927549	10.4286	0.132777	0.609199
HMGU	Cckar	homozygote	female	21.825	20.6667	3.339	21.74	21.19	13.2515	6.54734	-0.55	2.02757	98.3619	87.6635	NaN	NaN	0.131429	NaN	1.83611	0.892574	10.6	0.131783	0.604641
TCP	Gart	heterozygote	female	26.4643	21.2667	3.1	20.2686	20.5229	15.4237	3.18529	0.254286	1.67398	80.8503	73.6524	2536.94	5160.56	0.152443	NaN	1.97724	0.910672	10.2857	0.0878677	0.604059
BCM	Igfbp7	homozygote	female	22.75	21.2333	3.1	21.5857	21.3571	14.9682	2.80277	-0.228571	1.9526	94.1963	86.306	NaN	NaN	NaN	NaN	NaN	0.918009	10.4286	0.130605	0.599233
HMGU	Gm4951	homozygote	female	22.4929	20.6667	3.339	22.0143	21.5	12.9943	7.62104	-0.514286	1.98609	95.6984	88.1905	NaN	NaN	0.145578	NaN	2.03378	0.92145	11	0.130107	0.596952
HMGU	Ica1l	homozygote	female	22	20.6667	3.339	23.675	23.175	13.4946	8.1537	-0.5	2.07964	100.97	89.623	NaN	NaN	0.129762	NaN	1.81282	0.888247	10.75	0.129209	0.592829
TCP	Atp5b	heterozygote	female	26.9786	21.319	3.1	20.51	20.4086	15.798	3.37568	-0.101429	1.63591	79.2021	71.2989	1637.48	4006.68	0.174593	NaN	2.26454	0.900885	10.5714	0.0861801	0.592457
KMPC	Romo1	heterozygote	female	22	20	NaN	23.6911	22.9411	19.1391	3.24554	-0.75	2.17077	105.007	94.9306	5613.18	10789.8	0.154286	0.125714	NaN	0.904958	10.7778	0.0860086	0.591278
ICS	Tm7sf2	homozygote	female	21	21	3.145	19.5375	19.7875	16.036	1.4627	0.25	1.99834	95.1868	92.6608	1378.86	2035.74	0.241667	0.129524	3.18001	0.972462	9.5	0.0839812	0.577341
KMPC	Dbn1	heterozygote	female	22	20	NaN	23.8113	24.5375	NaN	NaN	0.72625	2.15631	101.909	102.844	4401.97	8887.83	0.22244	0.175119	NaN	1.00903	11.75	0.0830148	0.570697
HMGU	Nutf2	heterozygote	female	23.55	20.75	3.339	22.225	21.15	13.5467	5.63436	-1.075	1.90926	93.6161	79.0074	NaN	NaN	0.104762	NaN	1.46356	0.843859	10.75	0.124088	0.569335
TCP	Atp6v0a1	heterozygote	female	26.6625	21.3583	3.1	22.1837	22.095	17.0936	4.1647	-0.08875	1.71867	83.5626	73.6444	1674.93	3697.22	0.126065	NaN	1.63511	0.882018	10.625	0.0825267	0.567342
TCP	Slc29a1	homozygote	female	26.25	21.3583	3.1	17.1025	17.5275	13.3892	2.40049	0.425	1.53957	73.9313	69.2617	1359.99	3113.34	0.100952	NaN	1.30939	0.93706	10.375	0.0823241	0.565949
HMGU	Bccip	heterozygote	female	22.25	20.75	3.339	20.725	20.125	16.2025	2.13181	-0.6	1.95203	94.5476	84.9315	NaN	NaN	0.134524	NaN	1.87935	0.898753	11	0.123129	0.564935
ICS	Enpp4	homozygote	female	21	20.875	3.145	19.75	20.1375	15.6323	1.83385	0.3875	2.00135	94.6286	95.3011	1091.26	1658.95	0.233333	0.156463	3.07036	1.00762	10.5	0.0817302	0.561866
HMGU	Cap2	heterozygote	female	24.3714	20.75	3.339	22.9714	22.1	NaN	NaN	-0.871429	1.87126	91.1905	79.4388	NaN	NaN	0.115646	NaN	1.61562	0.872314	10.4286	0.120756	0.554046
BCM	Adamts13	homozygote	female	22.75	21	3.1	21.6	21.0286	15.3699	2.72209	-0.571429	1.94302	93.3615	87.2117	NaN	NaN	NaN	NaN	NaN	0.934628	10.5714	0.12053	0.553009
HMGU	Slc22a4	homozygote	female	22.1	20.6667	3.339	21.8222	21.3667	12.9275	6.53811	-0.455556	1.99812	96.9753	86.2416	NaN	NaN	0.124339	NaN	1.73706	0.889061	10.2222	0.119803	0.549673
BCM	Lamtor5	heterozygote	female	22.75	21.1667	3.1	20.4714	20.8	14.3138	2.83035	0.328571	1.90222	91.2288	85.9934	NaN	NaN	NaN	NaN	NaN	0.94156	10.7143	0.119149	0.546673
BCM	Cyp7b1	homozygote	female	22.75	21.2333	3.1	19.9	19.8333	13.9878	2.56285	-0.0666667	1.88142	91.3964	80.9018	NaN	NaN	NaN	NaN	NaN	0.886658	10	0.118312	0.542835
BCM	Tbc1d24	homozygote	female	22.75	21.2333	3.1	21.34	21.28	15.0762	2.9779	-0.06	1.93155	92.3454	88.3521	NaN	NaN	NaN	NaN	NaN	0.959287	11	0.118135	0.54202
ICS	Ogfr	heterozygote	female	21	21	3.145	20.3625	20.8	15.6377	2.27481	0.4375	2.02367	96.9545	91.8352	1161.6	1760.25	0.239226	0.127976	3.1479	0.945878	10	0.0787218	0.541184
TCP	Dtnbp1	homozygote	female	26.65	22.1375	3.1	19.9275	20.0637	15.4664	3.3476	0.13625	1.62939	78.9174	70.9033	1810.88	4157.93	0.131816	NaN	1.7097	0.897774	10.75	0.0785231	0.539818
HMGU	Akr7a5	heterozygote	female	22.1	20.75	3.339	21.7143	22.0143	12.9497	6.41793	0.3	1.99198	96.0323	88.2738	NaN	NaN	0.153741	NaN	2.14783	0.918021	11	0.117428	0.538777
BCM	Cilp	homozygote	female	22.75	21.2333	3.1	20.2	19.9	14.1241	2.56266	-0.3	1.89069	91.5655	82.3021	NaN	NaN	NaN	NaN	NaN	0.89983	10	0.1171	0.537272
HMGU	Zdhhc5	homozygote	female	21.845	20.6667	3.339	21.14	21.16	13.2756	5.76139	0.02	1.98935	95.3381	90.1794	NaN	NaN	0.158095	NaN	2.20865	0.945624	10.2	0.116003	0.532239
TCP	Lrrc2	homozygote	female	26.725	21.3583	3.1	21.6562	21.2138	16.7535	4.05212	-0.4425	1.68413	81.8406	72.3172	1409.89	3282.1	0.0871501	NaN	1.13037	0.883815	10.375	0.0769971	0.529328
TCP	Ahcy	heterozygote	female	26.9375	21.6333	3.1	22.485	22.12	17.519	3.98057	-0.365	1.71824	83.1631	74.9749	2212.77	5163.04	0.155909	NaN	2.0222	0.902367	10.25	0.076867	0.528433
TCP	Fcmr	homozygote	female	27.0312	21.5417	3.1	20.8675	21.3925	16.4211	3.10906	0.525	1.63749	78.5617	73.9213	1809.66	4150.58	0.161209	NaN	2.09095	0.941162	10.625	0.0759533	0.522152
ICS	Kansl1	heterozygote	female	21	21	3.145	20.4125	20.2875	15.501	2.42508	-0.125	2.01877	97.2045	89.8864	816.017	1323.57	0.207262	0.107211	2.72729	0.923748	11	0.0755628	0.519467
BCM	Zscan21	homozygote	female	22.75	21.2333	3.1	21.3	20	14.929	2.94777	-1.3	1.92477	96.1567	73.3061	NaN	NaN	NaN	NaN	NaN	0.76236	10	0.112752	0.517325
ICS	Csf2rb	heterozygote	female	21	21	3.145	20.9429	20.7429	16.0898	2.48766	-0.2	2.04319	98.0999	91.9728	1234.16	1839.16	0.234286	0.128952	3.08289	0.936839	10	0.074395	0.511439
HMGU	Zmym6	homozygote	female	21.7	20.6667	3.339	21.3857	20.6571	13.1078	5.97553	-0.728571	2.00375	96.8322	87.9683	NaN	NaN	0.123129	NaN	1.72016	0.907659	10.7143	0.111102	0.509754
BCM	Rps6kc1	homozygote	female	22.75	21.2333	3.1	18.275	18.4	12.6098	2.80786	0.125	1.8167	86.8914	82.969	NaN	NaN	NaN	NaN	NaN	0.954134	11	0.110357	0.506334
BCM	Spata5	heterozygote	female	22.75	21.2333	3.1	20.7714	20.7143	14.452	2.78965	-0.0571429	1.90375	91.8274	84.1916	NaN	NaN	NaN	NaN	NaN	0.917547	10.8571	0.110201	0.50562
BCM	Scarb1	heterozygote	female	22.75	21	3.1	20.1667	19.7333	14.1056	3.04077	-0.433333	1.88258	90.4945	84.3655	NaN	NaN	NaN	NaN	NaN	0.932207	10	0.110154	0.505403
HMGU	Pef1	homozygote	female	24.4062	20.75	3.339	20.2625	19.1	NaN	NaN	-1.1625	1.76248	85.9524	74.5967	NaN	NaN	0.0940476	NaN	1.31388	0.864152	11	0.109179	0.500929
TCP	Eprs	heterozygote	female	26.775	21.0375	3.1	19.8263	19.9213	15.4472	3.51328	0.095	1.60978	77.7977	70.6572	1841.89	4208.08	0.170952	NaN	2.21732	0.909997	10.375	0.0713227	0.490318
TCP	Gtpbp2	homozygote	female	26.175	21.45	3.1	21.4325	21.385	16.2248	4.20778	-0.0475	1.71173	83.479	72.4446	1620.53	3747.57	0.11645	NaN	1.51041	0.867266	11	0.0708902	0.487345
TCP	Fbxo9	homozygote	female	26.4	21.2667	3.1	20.7188	20.9275	15.9515	3.55234	0.20875	1.66531	80.4004	73.3831	1540.41	3624.34	0.156531	NaN	2.03027	0.912674	11	0.0698425	0.480142
TCP	Lpin2	homozygote	female	26.6786	21.0571	3.1	18.4786	18.3986	14.262	3.08942	-0.08	1.55264	75.1625	67.6978	1345.71	3359.75	0.141429	NaN	1.83439	0.898926	11	0.0684642	0.470667
BCM	Zfp111	homozygote	female	22.75	21.1667	3.1	19.7143	19.4286	13.4709	2.98241	-0.285714	1.85696	89.7152	81.6059	NaN	NaN	NaN	NaN	NaN	0.909145	10	0.100335	0.460352
HMGU	Il4i1	homozygote	female	22.27	20.6833	3.339	23.42	22.38	NaN	NaN	-1.04	2.02077	98.7492	84.8151	NaN	NaN	0.0980952	NaN	1.37043	0.8603	10.8	0.0992099	0.45519
ICS	Cbr3	homozygote	female	21	21	3.145	21.5857	22.2714	16.3264	2.71935	0.685714	2.05765	98.1494	94.9221	968.221	1506.03	0.257415	0.104841	3.38724	0.968762	11	0.0660371	0.453981
HMGU	Napb	heterozygote	female	21.8	20.6667	3.339	20.075	19.725	NaN	NaN	-0.35	1.93831	94.0734	83.6567	NaN	NaN	0.123214	NaN	1.72135	0.888489	11	0.0988402	0.453494
TCP	Yars	heterozygote	female	26.6643	21.4238	3.1	21.0586	21.1843	16.0058	4.01147	0.125714	1.65827	80.3873	71.9087	1611.33	3876.61	0.136546	NaN	1.77106	0.89601	10.7143	0.0656565	0.451365
TCP	Pex26	heterozygote	female	27.7786	20.6381	3.1	22.0171	22.4543	16.3874	4.11382	0.437143	1.61854	78.0096	71.7943	1758.71	3969.44	0.15034	NaN	1.94997	0.921009	11	0.0651885	0.448148
TCP	Tep1	homozygote	female	26.6687	21.725	3.1	20.8738	20.77	16.6377	3.63307	-0.10375	1.65453	80.1772	71.8481	1952.54	4488.9	0.187186	NaN	2.42788	0.897392	10.25	0.0643714	0.44253
KMPC	Npas3	heterozygote	female	22	20	NaN	21.5143	20.84	16.8074	3.97024	-0.674286	2.05781	98.6107	93.3129	5544.5	10282.3	0.157279	0.117687	NaN	0.946197	11.5714	0.0643139	0.442135
RBRC	Hbq1a	homozygote	female	23	19.9048	3.339	22.7143	23.0571	16.2612	3.74682	0.342857	1.94865	93.9966	86.1649	488.714	488.925	0.172571	0.19966	2.41089	0.91641	11	0.0612755	0.421247
TCP	Kctd15	heterozygote	female	26.3062	21.4042	3.1	22.6525	21.48	16.7069	4.87461	-1.1725	1.74463	85.4178	72.6451	1857.28	4130.1	0.0865179	NaN	1.12217	0.850712	11	0.0610277	0.419544
HMGU	Tyk2	homozygote	female	22.2	20.6667	3.339	21.45	21.425	13.3711	5.76741	-0.025	1.94852	93.996	86.1389	NaN	NaN	0.142857	NaN	1.99577	0.916575	11	0.0905984	0.415679
RBRC	Trpc3	heterozygote	female	23	19.8333	3.339	22.6286	22.8143	16.4552	3.60537	0.185714	1.94564	94.0662	85.2652	687.939	689.129	0.164841	0.201111	2.30289	0.906276	11	0.0599703	0.412274
MRC Harwell	Cib2	homozygote	female	19.4333	20	NaN	20.6	20.9189	16.2994	3.12815	0.318889	2.16652	104.117	97.1858	4994.69	6759.21	NaN	NaN	NaN	0.93375	10.4444	0.0592108	0.407053
BCM	Dppa1	heterozygote	female	22.75	21.2333	3.1	21.56	21.02	14.4628	3.58673	-0.54	1.90837	92.9748	81.1	NaN	NaN	NaN	NaN	NaN	0.872368	10	0.0872701	0.400408
HMGU	Ttll12	homozygote	female	22.2	20.6667	3.339	21.8778	21.3889	12.9237	6.70872	-0.488889	1.96006	95.3157	83.9295	NaN	NaN	0.118519	NaN	1.65575	0.879616	10.4444	0.0871916	0.400048
BCM	Rundc3a	homozygote	female	22.75	21.125	3.1	16.7	17.4	11.9027	2.39822	0.7	1.73814	82.7066	80.9037	NaN	NaN	NaN	NaN	NaN	0.978996	10.75	0.0868139	0.398315
TCP	Gnpda1	heterozygote	female	26.6714	21.6333	3.1	22.1086	22.17	16.587	3.97908	0.0614286	1.69085	81.7216	74.1943	1546.09	3745.93	0.150974	NaN	1.95819	0.908146	10.7143	0.0579283	0.398236
TCP	Sh3bp2	homozygote	female	26.5857	21.1095	3.1	21.39	20.4429	16.8348	3.55042	-0.947143	1.67208	81.5203	70.8554	1721.84	4203.79	0.102976	NaN	1.33564	0.87123	10.1429	0.0579104	0.398113
HMGU	Dpp9	heterozygote	female	24.5	20.75	3.339	21.2714	20.2	NaN	NaN	-1.07143	1.76834	86.3197	74.5544	NaN	NaN	0.0979592	NaN	1.36853	0.863045	10.2857	0.0867296	0.397928
[truncated: 673 more rows]
